# Supplementary material for: TMEDA-catalyzed synthesis of pentasubstituted 2-aminopyrroles from ynehydrazides and dialkyl acetylenedicarboxylates
Source: Royal Society of Chemistry journal article supplement (doi:10.1039/d5ob01825k), 2026-01-01

## Supporting Information

# TMEDA-Catalyzed Synthesis of Pentasubstituted 2-Aminopyrroles from Ynehydrazides and Dialkyl Acetylenedicarboxylates

Zhiwei Zeng,<sup>a</sup> Jingwei Lin,<sup>b</sup> Yongchao Xie,<sup>d</sup> Jiangbin Guo,<sup>b</sup> Nan Ma,<sup>d</sup> Jian Lei,<sup>\*b,c</sup> Jinguo Lin<sup>\*a</sup> and Xiaolan Xie<sup>\*b</sup>

<sup>a</sup>College of Materials Engineering, Fujian Agriculture and Forestry University, Fuzhou 350002, PR China.

<sup>b</sup>College of Chemical Engineering and Materials Science, Quanzhou Normal University, Quanzhou 362000, PR China.

<sup>c</sup>Key Laboratory of Chemical Materials and Green Nanotechnology, College of Chemical Engineering and Materials Science, Quanzhou Normal University, Quanzhou 362000, PR China.

<sup>d</sup> College of Pharmacy, Jinan University, Guangzhou 510632, PR China.

E-mail: leijian0902@hotmail.com; fjlinjg@126.com; xxl\_qztc@163.com

### Table of Contents

|                                                                                   |      |
|-----------------------------------------------------------------------------------|------|
| I. General considerations .....                                                   | S-2  |
| II. Optimization of reaction conditions .....                                     | S-3  |
| III. General procedure for the synthesis of pentasubstituted 2-aminopyrroles..... | S-5  |
| IV. Characterization data for the products .....                                  | S-15 |
| V. Synthetic applications.....                                                    | S-19 |
| VI. Mechanism studies .....                                                       | S-26 |
| VII. References.....                                                              | S-28 |
| VIII. Copies of NMR spectra .....                                                 | S-28 |

## I. General considerations

**Reagents.** Unless otherwise indicated, all reactions were carried out in Schlenk tube under an argon atmosphere with dry solvents. Anhydrous MeCN was purchased from Alfa Aesar and used as received. Ether/THF was dried and purified by distillation from sodium/benzophenone. CH<sub>2</sub>Cl<sub>2</sub> were distilled from CaH<sub>2</sub>. CuCl<sub>2</sub> was purchased from Aladdin. Other copper catalysts were purchased from Alfa Aesar, Strem, Aladdin or JK Chemical and used as received. All other reagents were purchased from commercial sources and used as received. For reactions that require heating, oil bath was used as the heat source. All ynehydrazides were synthesized according to our previously reported procedure and Batey's conditions, the NMR data were consistent with the related literature.<sup>[1],[2]</sup>

**Analytical Methods.** All new compounds were characterized by <sup>1</sup>H NMR, <sup>13</sup>C NMR, and HRMS. NMR spectra were recorded on a Bruker AV-400 instrument in CDCl<sub>3</sub>. All <sup>1</sup>H NMR spectra are reported in ppm downfield from tetramethylsilane (0 ppm). All <sup>13</sup>C NMR spectra are reported in ppm relative to residual CHCl<sub>3</sub> (77.0 ppm). Coupling constants are reported in Hz with multiplicities denoted as s (singlet), d (doublet), t (triplet), q (quartet), m (multiplet) and br (broad). Flash column chromatography was performed over silica gel (200-300 mesh) using petroleum ether and ethyl acetate as the eluent. Reactions were monitored by thin-layer chromatography (TLC) carried out on commercial silica gel plates (GF254) using UV light as a visualizing agent. Flash chromatography was performed on silica gel 60 (200-300 mesh). High-resolution mass spectra (HRMS; (ESI)) were acquired with quadrupole and time-of-flight (TOF) mass spectrometers.

## II. Optimization of reaction conditions

**Table S1. Catalyst screening**

| Entry | Catalyst                       | Reaction time (h) | Yield of <b>3a(4a)</b> <sup>a</sup> |
|-------|--------------------------------|-------------------|-------------------------------------|
| 1     | DABCO                          | 1                 | 47%(10%)                            |
| 2     | <b>TMEDA</b>                   | <b>1</b>          | <b>85%(7%)</b>                      |
| 3     | NEt <sub>3</sub>               | 3                 | trace                               |
| 4     | DMAP                           | 3                 | 26%(28%)                            |
| 5     | K <sub>2</sub> CO <sub>3</sub> | 3                 | trace                               |
| 6     | NaOAc                          | 3                 | 16%(10%)                            |
| 7     | -                              | 1                 | 0                                   |

<sup>a</sup>0.2 mmol scale experiment, yields were determined by <sup>1</sup>H NMR using 4-nitroacetophenone as internal standard, the yield of **4a** in parentheses.

**Table S2. Solvent screening**

| Entry | Solvent        | Reaction time (h) | Yield of <b>3a(4a)</b> <sup>a</sup> |
|-------|----------------|-------------------|-------------------------------------|
| 1     | DCM            | 1                 | 79%(7%)                             |
| 2     | Xylene         | 1                 | 83%(7%)                             |
| 3     | MeCN           | 1                 | 38%(32%)                            |
| 4     | <b>Toluene</b> | <b>1</b>          | <b>85%(7%)</b>                      |
| 5     | THF            | 2.5               | 70%(8%)                             |

<sup>a</sup>0.2 mmol scale experiment, yields were determined by <sup>1</sup>H NMR using 4-nitroacetophenone as internal standard, the yield of **4a** in parentheses.

**Table S3. Reaction concentration**

| Entry | X   | Reaction time (h) | Yield of <b>3a(4a)</b> <sup>a</sup> |
|-------|-----|-------------------|-------------------------------------|
| 1     | 0.4 | 1                 | 84%(7%)                             |

|          |            |          |                |
|----------|------------|----------|----------------|
| <b>2</b> | <b>0.2</b> | <b>1</b> | <b>85%(7%)</b> |
| 3        | 0.1        | 2.5      | 83%(10%)       |

<sup>a</sup>0.2 mmol scale experiment, yields were determined by <sup>1</sup>H NMR using 4-nitroacetophenone as internal standard, the yield of **4a** in parentheses.

**Table S4.** Equivalent of dimethyl acetylenedicarboxylate

| 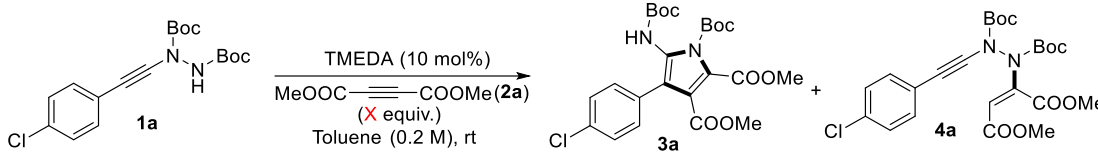 |            |                   |                                     |
|------------------------------------------------------------------------------------|------------|-------------------|-------------------------------------|
| Entry                                                                              | X          | Reaction time (h) | Yield of <b>3a(4a)</b> <sup>a</sup> |
| 1                                                                                  | 0.8        | 1                 | 56%(6%)                             |
| 2                                                                                  | 1.4        | 1                 | 81%(7%)                             |
| <b>3</b>                                                                           | <b>1.6</b> | <b>1</b>          | <b>85%(7%)</b>                      |
| 4                                                                                  | 2.0        | 1                 | 82%(10%)                            |

<sup>a</sup>0.2 mmol scale experiment, yields were determined by <sup>1</sup>H NMR using 4-nitroacetophenone as internal standard, the yield of **4a** in parentheses.

**Table S5.** Reaction temperature

| 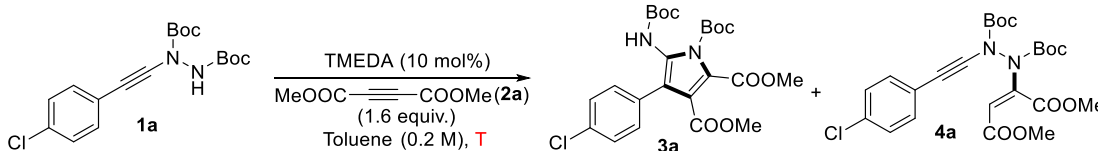 |           |                   |                                     |
|--------------------------------------------------------------------------------------|-----------|-------------------|-------------------------------------|
| Entry                                                                                | T (°C)    | Reaction time (h) | Yield of <b>3a(4a)</b> <sup>a</sup> |
| 1                                                                                    | 50        | 1                 | 80%(12%)                            |
| <b>2</b>                                                                             | <b>rt</b> | <b>1</b>          | <b>85%(7%)</b>                      |
| 3                                                                                    | 0         | 5                 | 84%(7%)                             |

<sup>a</sup>0.2 mmol scale experiment, yields were determined by <sup>1</sup>H NMR using 4-nitroacetophenone as internal standard, the yield of **4a** in parentheses.

### III. General procedure for the synthesis of pentasubstituted 2-aminopyrroles

**General Procedure:** In a 15 mL resealable screw-cap test tube, ynehydrazide (0.2 mmol, 1.0 equiv.), toluene (1.0 mL), dimethyl acetylenedicarboxylate (45.5 mg, 0.32 mmol, 1.6 equiv.), *N,N,N',N'*-tetramethylethylenediamine (TMEDA, 2.3 mg, 0.02 mmol, 10 mol%) were added successively. The reaction mixture is stirred rapidly at room temperature until completion, subsequently diluted with ethyl acetate (4.0 mL), followed by the addition of saturated aqueous water (4.0 mL). The aqueous layer was extracted with ethyl acetate (3 × 6 mL). The combined organic layer was washed with brine (5.0 mL), dried over Na<sub>2</sub>SO<sub>4</sub>, filtered, and concentrated. The crude product was purified by flash chromatography (silica gel, 200~300 mesh) or preparative TLC to afford the related pentasubstituted 2-aminopyrroles.

### IV. Characterization data for the products

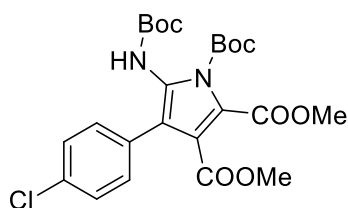

**1-((*tert*-Butyl) 2,3-dimethyl 5-((*tert*-butoxycarbonyl)amino)-4-(4-chlorophenyl)-1H-pyrrole-1,2,3-tricarboxylate (3a):** The representative procedure was followed using di-*tert*-butyl 1-((4-chlorophenyl)ethynyl)hydrazine-1,2-dicarboxylate (73.4 mg, 0.2 mmol). Upon stirring at room temperature for 1 h, the reaction mixture was worked up and purified by flash chromatography (silica gel, eluted with 10:1 petroleum ether:ethyl acetate) to afford **3a** (84.6 mg, 83% yield) as a white solid, m.p. 146.4-148.2 °C. <sup>1</sup>H NMR (400 MHz, CDCl<sub>3</sub>) δ 7.33 (d, *J* = 8.4 Hz, 2H), 7.28 (d, *J* = 8.4 Hz, 2H), 6.28 (s, 1H, -NH), 3.92 (s, 3H), 3.68 (s, 3H), 1.58 (s, 9H), 1.33 (br s, 9H); <sup>13</sup>C{<sup>1</sup>H} NMR (100 MHz, CDCl<sub>3</sub>) δ 163.4, 162.0, 153.0, 147.2, 133.4, 131.0, 130.4, 128.0, 125.7, 125.3, 121.0, 116.9, 86.9, 81.4, 52.8, 51.9, 27.9, 27.5; HRMS (ESI) *m/z*: [M + H]<sup>+</sup> Calcd for C<sub>24</sub>H<sub>30</sub>ClN<sub>2</sub>O<sub>8</sub> 509.1685, found 509.1688.

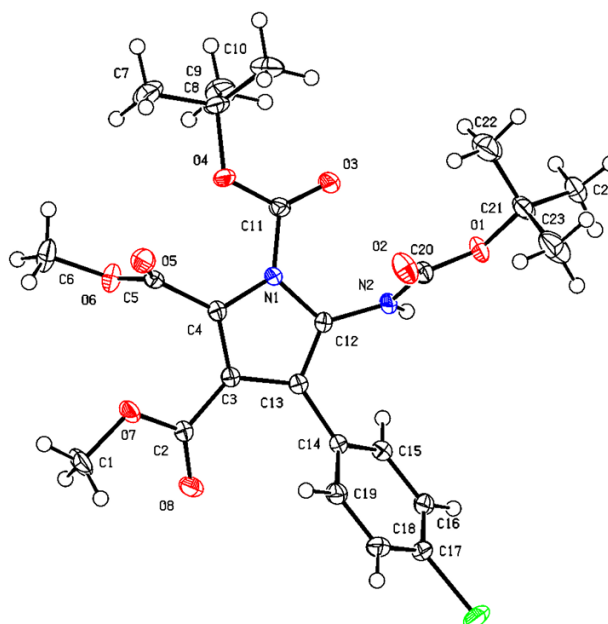

**X-Ray structure of 4a (CCDC 2502084)**

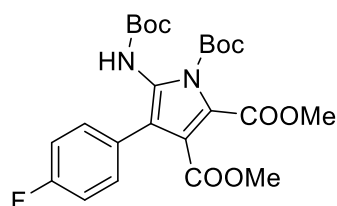

**1-(*tert*-Butyl 2,3-dimethyl 5-((*tert*-butoxycarbonyl)amino)-4-(4-fluorophenyl)-1*H*-pyrrole-1,2,3-tricarboxylate (3b):** The representative procedure was followed using di-*tert*-butyl 1-((4-fluorophenyl)ethynyl)hydrazine-1,2-dicarboxylate (70.1 mg, 0.2 mmol). Upon stirring at room temperature for 1 h, the reaction mixture was worked up and purified by flash chromatography (silica gel, eluted with 10:1 petroleum ether:ethyl acetate) to afford **3b** (74.2 mg, 75% yield) as a white solid, m.p. 156.2–157.6 °C. <sup>1</sup>H NMR (400 MHz, CDCl<sub>3</sub>) δ 7.34–7.27 (m, 2H), 7.03 (dd, *J* = 8.4, 8.4 Hz, 2H), 6.30 (s, 1H, -*NH*), 3.91 (s, 3H), 3.67 (s, 3H), 1.57 (s, 9H), 1.32 (s, 9H); <sup>13</sup>C{<sup>1</sup>H} NMR (100 MHz, CDCl<sub>3</sub>) δ 163.5, 162.2 (d, *J* = 244.8 Hz), 162.1, 153.1, 147.2, 131.4 (d, *J* = 8.1 Hz), 127.8 (d, *J* = 3.3 Hz), 125.6, 125.3, 121.2, 117.1, 114.8 (d, *J* = 21.3 Hz), 86.9, 81.3, 52.8, 51.9, 28.0, 27.6; <sup>19</sup>F NMR (376 MHz, CDCl<sub>3</sub>) δ -114.83 (s); HRMS (ESI) *m/z*: [*M* + *H*]<sup>+</sup> Calcd for C<sub>24</sub>H<sub>30</sub>FN<sub>2</sub>O<sub>8</sub> 493.1981, found 493.1982.

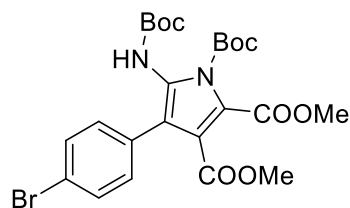

**2,3-Dibenzyl 1-(*tert*-butyl) 4-(4-bromophenyl)-5-((*tert*-butoxycarbonyl)amino)-1*H*-pyrrole-1,2,3-tricarboxylate (3c):** The representative procedure was followed using di-*tert*-butyl 1-((4-bromophenyl)ethynyl)hydrazine-1,2-dicarboxylate (82.3 mg, 0.2 mmol). Upon stirring at room temperature for 1 h, the reaction mixture was worked up and purified by flash chromatography (silica gel, eluted with 10:1 petroleum ether:ethyl acetate) to afford **3c** (90.7 mg, 82% yield) as a white solid, m.p. 140.6-141.8 °C. <sup>1</sup>H NMR (400 MHz, CDCl<sub>3</sub>) δ 7.47 (d, *J* = 8.8 Hz, 2H), 7.21 (d, *J* = 8.8 Hz, 2H), 6.32 (s, 1H, -NH), 3.91 (s, 3H), 3.67 (s, 3H), 1.56 (s, 9H), 1.32 (s, 9H); <sup>13</sup>C {<sup>1</sup>H} NMR (100 MHz, CDCl<sub>3</sub>) δ 163.4, 162.0, 153.0, 147.1, 131.3, 130.93, 130.86, 125.7, 125.2, 121.6, 120.9, 116.8, 86.9, 81.4, 52.8, 51.9, 27.9, 27.5; HRMS (ESI) *m/z*: [M + H]<sup>+</sup> Calcd for C<sub>24</sub>H<sub>30</sub>BrN<sub>2</sub>O<sub>8</sub> 553.1180, found 553.1184.

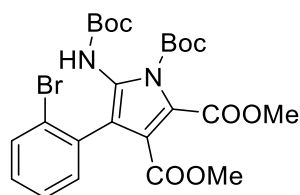

**1-(*tert*-Butyl) 2,3-dimethyl 4-(2-bromophenyl)-5-((*tert*-butoxycarbonyl)amino)-1*H*-pyrrole-1,2,3-tricarboxylate (3d):** The representative procedure was followed using di-*tert*-butyl 1-((2-bromophenyl)ethynyl)hydrazine-1,2-dicarboxylate (82.3 mg, 0.2 mmol). Upon stirring at room temperature for 2 h, the reaction mixture was worked up and purified by flash chromatography (silica gel, eluted with 8:1 petroleum ether:ethyl acetate) to afford **3d** (90.3 mg, 81% yield) as a white solid, m.p. 132.7-134.5 °C. <sup>1</sup>H NMR (400 MHz, CDCl<sub>3</sub>) δ 7.59 (d, *J* = 8.0 Hz, 1H), 7.33-7.27 (m, 2H), 7.22-7.13 (m, 1H), 6.16 (s, 1H, -NH), 3.93 (s, 3H), 3.60 (s, 3H), 1.57 (s, 9H), 1.33 (s, 9H); <sup>13</sup>C {<sup>1</sup>H} NMR (100 MHz, CDCl<sub>3</sub>) δ 162.9, 162.4, 153.2, 147.0, 133.3, 132.1, 132.0, 129.1, 126.8, 126.7, 125.0, 124.6, 121.6, 115.9, 86.7, 81.1, 52.9, 51.7, 28.0, 27.5; HRMS (ESI) *m/z*: [M + H]<sup>+</sup> Calcd for C<sub>24</sub>H<sub>30</sub>BrN<sub>2</sub>O<sub>8</sub> 553.1180, found 553.1183.

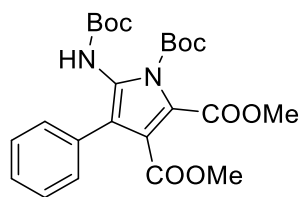

**1-(*tert*-Butyl) 2,3-dimethyl 5-((*tert*-butoxycarbonyl)amino)-4-phenyl-1*H*-pyrrole-1,2,3-tricarboxylate (3e):** The representative procedure was followed using di-*tert*-butyl 1-(phenylethynyl)hydrazine-1,2-dicarboxylate (66.5 mg, 0.2 mmol). Upon stirring at room temperature for 1 h, the reaction mixture was worked up and purified by flash chromatography (silica gel, eluted with 12:1 petroleum ether:ethyl acetate) to afford **3e** (70.0 mg, 74% yield) as a white solid. m.p. 147.6-149.2 °C. <sup>1</sup>H NMR (400 MHz, CDCl<sub>3</sub>) δ 7.39-7.27 (m, 5H), 6.25 (s, 1H, -NH), 3.91 (s, 3H), 3.66 (s, 3H), 1.57 (s, 9H), 1.31 (br s, 9H); <sup>13</sup>C{<sup>1</sup>H} NMR (100 MHz, CDCl<sub>3</sub>) δ 163.7, 162.1, 153.2, 147.3, 131.8, 129.6, 127.9, 127.4, 125.2, 122.0, 117.6, 86.7, 81.2, 52.8, 51.9, 28.0, 27.6; HRMS (ESI) m/z: [M + H]<sup>+</sup> Calcd for C<sub>24</sub>H<sub>31</sub>N<sub>2</sub>O<sub>8</sub> 475.2075, found 475.2074.

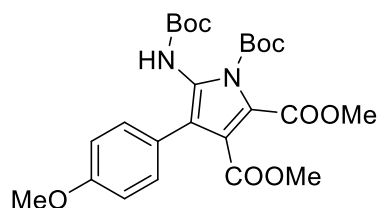

**1-(*tert*-Butyl) 2,3-dimethyl 5-((*tert*-butoxycarbonyl)amino)-4-(4-methoxyphenyl)-1*H*-pyrrole-1,2,3-tricarboxylate (3f):** The representative procedure was followed using di-*tert*-butyl 1-((4-methoxyphenyl)ethynyl)hydrazine-1,2-dicarboxylate (72.5 mg, 0.2 mmol). Upon stirring at room temperature for 1.5 h, the reaction mixture was worked up and purified by flash chromatography (silica gel, eluted with 8:1 petroleum ether:ethyl acetate) to afford **3f** (81.1 mg, 80% yield) as a white solid, m.p. 141.5-143.0 °C. <sup>1</sup>H NMR (400 MHz, CDCl<sub>3</sub>) δ 7.27 (d, *J* = 8.0 Hz, 2H), 6.89 (d, *J* = 8.0 Hz, 2H), 6.23 (s, 1H, -NH), 3.91 (s, 3H), 3.81 (s, 3H), 3.68 (s, 3H), 1.57 (s, 9H), 1.34 (br s, 9H); <sup>13</sup>C{<sup>1</sup>H} NMR (100 MHz, CDCl<sub>3</sub>) δ 163.8, 162.1, 158.9, 153.3, 147.2, 130.8, 125.2, 125.0, 124.0, 121.8, 117.5, 113.3, 86.5, 81.1, 55.2, 52.7, 51.8, 27.9, 27.5; HRMS (ESI) m/z: [M + H]<sup>+</sup> Calcd for C<sub>25</sub>H<sub>32</sub>N<sub>2</sub>O<sub>9</sub> 505.2181, found 505.2179.



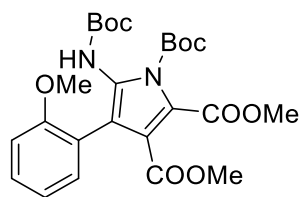

**1-(*tert*-Butyl) 2,3-dimethyl 5-((*tert*-butoxycarbonyl)amino)-4-(2-methoxyphenyl)-1*H*-pyrrole-1,2,3-tricarboxylate (3g):** The representative procedure was followed using di-*tert*-butyl 1-((2-methoxyphenyl)ethynyl)hydrazine-1,2-dicarboxylate (72.5 mg, 0.2 mmol). Upon stirring at room temperature for 1 h, the reaction mixture was worked up and purified by flash chromatography (silica gel, eluted with 4:1 petroleum ether:ethyl acetate) to afford **3g** (80.3 mg, 79% yield) as a yellow foam.  $^1\text{H}$  NMR (400 MHz,  $\text{CDCl}_3$ )  $\delta$  7.23 (ddd,  $J = 8.4, 8.4, 2.0$  Hz, 1H), 7.20 (d,  $J = 8.4$  Hz, 1H), 6.89 (dd,  $J = 8.4, 8.4, 2.0$  Hz, 1H), 6.84 (d,  $J = 8.4$  Hz, 1H), 6.16 (s, 1H,  $-\text{NH}$ ), 3.83 (s, 3H), 3.68 (s, 3H), 3.56 (s, 3H), 1.49 (s, 9H), 1.28 (br s, 9H);  $^{13}\text{C}\{^1\text{H}\}$  NMR (100 MHz,  $\text{CDCl}_3$ )  $\delta$  163.6, 162.2, 156.8, 153.5, 147.1, 131.3, 129.0, 125.4, 125.3, 120.7, 120.2, 117.7, 110.6, 86.1, 80.9, 55.4, 52.6, 51.5, 28.0, 27.5; HRMS (ESI)  $m/z$ :  $[\text{M} + \text{H}]^+$  Calcd for  $\text{C}_{25}\text{H}_{33}\text{N}_2\text{O}_9$  505.2181, found 505.2183.

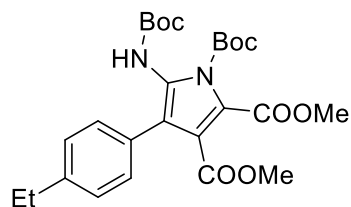

**1-(*tert*-Butyl) 2,3-dimethyl 5-((*tert*-butoxycarbonyl)amino)-4-(4-ethylphenyl)-1*H*-pyrrole-1,2,3-tricarboxylate (3h):** The representative procedure was followed using di-*tert*-butyl 1-((4-ethylphenyl)ethynyl)hydrazine-1,2-dicarboxylate (72.1 mg, 0.2 mmol). Upon stirring at room temperature for 1 h, the reaction mixture was worked up and purified by flash chromatography (silica gel, eluted with 9:1 petroleum ether:ethyl acetate) to afford **3h** (82.7 mg, 82% yield) as a yellow liquid.  $^1\text{H}$  NMR (400 MHz,  $\text{CDCl}_3$ )  $\delta$  7.25 (d,  $J = 8.0$  Hz, 2H), 7.18 (d,  $J = 8.0$  Hz, 2H), 6.26 (s, 1H), 3.91 (s, 3H), 3.68 (s, 3H), 2.65 (q,  $J = 7.6$  Hz, 2H), 1.57 (s, 9H), 1.36-1.28 (m, 9H), 1.24 (t,  $J = 7.6$  Hz, 3H);  $^{13}\text{C}\{^1\text{H}\}$  NMR (100 MHz,  $\text{CDCl}_3$ )  $\delta$  163.8, 162.0, 153.3, 147.2, 143.3, 129.4, 128.9, 127.3, 125.1, 125.0, 121.9, 117.6, 86.5, 81.1, 52.7, 51.8, 28.6, 27.9, 27.5, 15.4; HRMS (ESI)  $m/z$ :  $[\text{M} + \text{H}]^+$  Calcd for  $\text{C}_{26}\text{H}_{35}\text{N}_2\text{O}_8$  503.2388, found 503.2396.

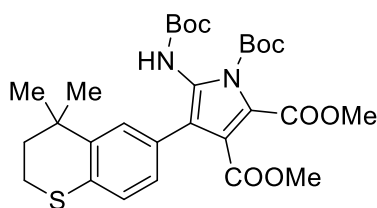

**1-(*tert*-Butyl) 2,3-dimethyl 5-((*tert*-butoxycarbonyl)amino)-4-(4,4-dimethylthiochroman-6-yl)-1*H*-pyrrole-1,2,3-tricarboxylate (3i):** The representative procedure was followed using di-*tert*-butyl 1-((4,4-dimethylthiochroman-6-yl)ethynyl)hydrazine-1,2-dicarboxylate (86.5 mg, 0.2 mmol). Upon stirring at room temperature for 40 min, the reaction mixture was worked up and purified by flash chromatography (silica gel, eluted with 10:1 petroleum ether:ethyl acetate) to afford **3i** (86.8 mg, 75% yield) as a yellow liquid.  $^1\text{H}$  NMR (400 MHz,  $\text{CDCl}_3$ )  $\delta$  7.34 (d,  $J$  = 1.6 Hz, 1H), 7.04 (d,  $J$  = 8.0 Hz, 1H), 6.99 (dd,  $J$  = 8.0, 1.6 Hz, 1H), 6.16 (s, 1H, -NH), 3.89 (s, 3H), 3.68 (s, 3H), 3.06-2.97 (m, 2H), 1.99-1.92 (m, 2H), 1.56 (s, 9H), 1.39-1.25 (m, 15H);  $^{13}\text{C}\{^1\text{H}\}$  NMR (100 MHz,  $\text{CDCl}_3$ )  $\delta$  164.0, 161.9, 153.5, 147.2, 141.3, 131.0, 128.1, 127.3, 127.1, 126.0, 125.1, 121.9, 117.9, 86.5, 81.3, 52.7, 51.9, 37.7, 33.0, 30.3, 29.7, 28.0, 27.5, 23.1; HRMS (ESI)  $m/z$ :  $[\text{M} + \text{H}]^+$  Calcd for  $\text{C}_{29}\text{H}_{39}\text{N}_2\text{O}_8\text{S}$  575.2422, found 575.2424.

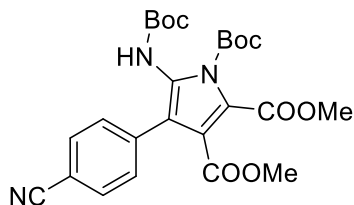

**1-(*tert*-Butyl) 2,3-dimethyl 5-((*tert*-butoxycarbonyl)amino)-4-(4-cyanophenyl)-1*H*-pyrrole-1,2,3-tricarboxylate (3j):** The representative procedure was followed using di-*tert*-butyl 1-((4-cyanophenyl)ethynyl)hydrazine-1,2-dicarboxylate (71.5 mg, 0.2 mmol). Upon stirring at room temperature for 50 min, the reaction mixture was worked up and purified by flash chromatography (silica gel, eluted with 4:1 petroleum ether:ethyl acetate) to afford **3j** (33.2 mg, 33% yield) as a white solid, m.p. 178.8-179.6 °C.  $^1\text{H}$  NMR (400 MHz,  $\text{CDCl}_3$ )  $\delta$  7.63 (d,  $J$  = 8.4 Hz, 2H), 7.45 (d,  $J$  = 8.4 Hz, 2H), 6.53 (s, 1H, -NH), 3.91 (s, 3H), 3.67 (s, 3H), 1.57 (s, 9H), 1.29 (s, 9H);  $^{13}\text{C}\{^1\text{H}\}$  NMR (100 MHz,  $\text{CDCl}_3$ )  $\delta$  163.1, 162.0, 152.5, 147.1, 137.3,

131.5, 130.5, 126.1, 125.8, 119.9, 119.0, 116.4, 110.9, 87.5, 81.6, 52.9, 52.0, 27.9, 27.5; HRMS (ESI)  $m/z$ :  $[M + H]^+$  Calcd for  $C_{25}H_{30}N_3O_8$  500.2027, found 500.2029.

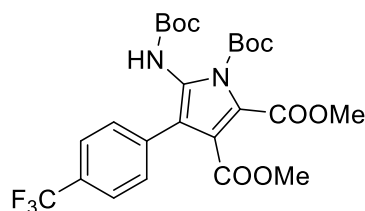

**1-(*tert*-Butyl) 2,3-dimethyl 5-((*tert*-butoxycarbonyl)amino)-4-(4-(trifluoromethyl)phenyl)-1*H*-pyrrole-1,2,3-tricarboxylate (3k):** The representative procedure was followed using di-*tert*-butyl 1-((4-(trifluoromethyl)phenyl)ethynyl)hydrazine-1,2-dicarboxylate (80.1 mg, 0.2 mmol). Upon stirring at room temperature for 50 min, the reaction mixture was worked up and purified by preparative TLC (silica gel, eluted with 3:1 petroleum ether:ethyl acetate) to afford **3k** (64.0 mg, 59% yield) as a white solid, m.p. 142.3-144.0 °C.  $^1H$  NMR (400 MHz,  $CDCl_3$ )  $\delta$  7.60 (d,  $J$  = 8.0 Hz, 2H), 7.47 (d,  $J$  = 8.0 Hz, 2H), 6.47 (s, 1H, -NH), 3.93 (s, 3H), 3.68 (s, 3H), 1.58 (s, 9H), 1.30 (s, 9H);  $^{13}C$   $\{^1H\}$  NMR (100 MHz,  $CDCl_3$ )  $\delta$  163.3, 162.0, 152.8, 147.1, 135.9, 130.1, 129.3 (q,  $J$  = 32.3 Hz), 125.9, 125.6, 124.7 (q,  $J$  = 3.7 Hz), 124.2 (q,  $J$  = 270.3 Hz), 120.6, 116.7, 87.2, 81.4, 52.8, 51.9, 27.8, 27.5;  $^{19}F$  NMR (376 MHz,  $CDCl_3$ )  $\delta$  -62.56 (s); HRMS (ESI)  $m/z$ :  $[M + H]^+$  Calcd for  $C_{25}H_{30}F_3N_2O_8$  543.1949, found 543.1951.

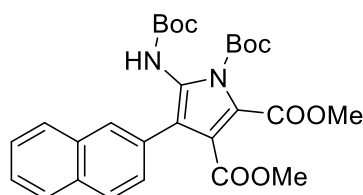

**1-(*tert*-Butyl) 2,3-dimethyl 5-((*tert*-butoxycarbonyl)amino)-4-(naphthalen-2-yl)-1*H*-pyrrole-1,2,3-tricarboxylate (3l):** The representative procedure was followed using di-*tert*-butyl 1-(naphthalen-2-ylethynyl)hydrazine-1,2-dicarboxylate (76.5 mg, 0.2 mmol). Upon stirring at room temperature for 1 h, the reaction mixture was worked up and purified by flash chromatography (silica gel, eluted with 8:1 petroleum ether:ethyl acetate) to afford **3l** (82.0 mg, 78% yield) as a white solid, m.p. 155.6-156.8 °C.  $^1H$  NMR (400 MHz,  $CDCl_3$ )  $\delta$  7.87-7.77 (m, 4H), 7.53-7.37 (m, 3H), 6.27 (s, 1H, -NH), 3.93 (s, 3H), 3.65 (s, 3H), 1.59 (s, 9H), 1.29 (br s,

9H);  $^{13}\text{C}\{^1\text{H}\}$  NMR (100 MHz,  $\text{CDCl}_3$ )  $\delta$  163.7, 162.1, 153.4, 147.3, 133.1, 132.6, 129.4, 128.4, 128.1, 127.9, 127.6, 127.2, 126.0, 125.9, 125.6, 125.4, 122.2, 117.5, 86.8, 81.3, 52.8, 51.9, 28.0, 27.6; HRMS (ESI)  $m/z$ :  $[\text{M} + \text{H}]^+$  Calcd for  $\text{C}_{28}\text{H}_{33}\text{N}_2\text{O}_8$  525.2231, found 525.2232.

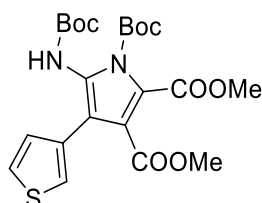

**1-(*tert*-Butyl) 2,3-dimethyl 5-((*tert*-butoxycarbonyl)amino)-4-(thiophen-3-yl)-1*H*-pyrrole-1,2,3-tricarboxylate (3m):** The representative procedure was followed using di-*tert*-butyl 1-(thiophen-2-ylethynyl)hydrazine-1,2-dicarboxylate (67.7 mg, 0.2 mmol). Upon stirring at room temperature for 1 h, the reaction mixture was worked up and purified by flash chromatography (silica gel, eluted with 12:1 petroleum ether:ethyl acetate) to afford **3m** (66.4 mg, 69% yield) as a white solid, m.p. 138.0-139.3 °C.  $^1\text{H}$  NMR (400 MHz,  $\text{CDCl}_3$ )  $\delta$  7.35 (s, 1H), 7.32-7.24 (m, 1H), 7.14 (d,  $J$  = 4.8 Hz, 1H), 6.37 (s, 1H, -NH), 3.90 (s, 3H), 3.73 (s, 3H), 1.57 (s, 9H), 1.35 (br s, 9H);  $^{13}\text{C}\{^1\text{H}\}$  NMR (100 MHz,  $\text{CDCl}_3$ )  $\delta$  163.8, 161.8, 153.1, 147.2, 131.3, 128.8, 125.4, 124.8, 124.3, 123.9, 117.8, 116.8, 86.7, 81.3, 52.7, 52.0, 28.0, 27.5; HRMS (ESI)  $m/z$ :  $[\text{M} + \text{H}]^+$  Calcd for  $\text{C}_{22}\text{H}_{29}\text{N}_2\text{O}_8\text{S}$  481.1639, found 481.1642.

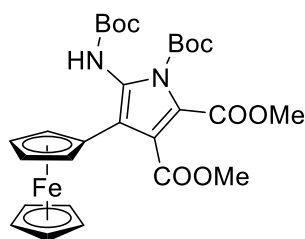

**1-(*tert*-Butyl) 2,3-dimethyl 5-((*tert*-butoxycarbonyl)amino)-4-ferrocenyl-1*H*-pyrrole-1,2,3-tricarboxylate (3n):** The representative procedure was followed using di-*tert*-butyl 1-(ferrocenylethynyl)hydrazine-1,2-dicarboxylate (88.1 mg, 0.2 mmol). Upon stirring at room temperature for 1 h, the reaction mixture was worked up and purified by flash chromatography (silica gel, eluted with 10:1 petroleum ether:ethyl acetate) to afford **3n** (96.7 mg, 83% yield) as a brown solid, m.p. 167.7-169.0 °C.  $^1\text{H}$  NMR (400 MHz,  $\text{CDCl}_3$ )  $\delta$  6.52 (br s, 1H, -NH), 4.55 (s, 2H), 4.23 (s, 2H), 4.08 (s, 5H), 3.89 (s, 3H), 3.86 (s, 3H), 1.71-1.09 (m, 18H);  $^{13}\text{C}\{^1\text{H}\}$  NMR

(100 MHz, CDCl<sub>3</sub>)  $\delta$  165.1, 161.0, 152.8, 147.3, 125.3, 122.2, 120.7, 116.7, 86.2, 81.4, 76.4, 70.4, 69.1, 68.2, 52.4, 52.2, 28.1, 27.4; HRMS (ESI)  $m/z$ : [M + H]<sup>+</sup> Calcd for C<sub>28</sub>H<sub>35</sub>FeN<sub>2</sub>O<sub>8</sub> 583.1737, found 583.1734.

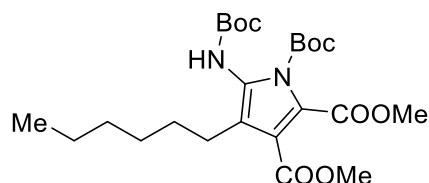

**1-(*tert*-Butyl) 2,3-dimethyl 5-((*tert*-butoxycarbonyl)amino)-4-hexyl-1*H*-pyrrole-1,2,3-tricarboxylate (3o):** The representative procedure was followed using di-*tert*-butyl 1-(oct-1-yn-1-yl)hydrazine-1,2-dicarboxylate (102.1 mg, 0.3 mmol). Upon stirring at room temperature for 1.5 h, the reaction mixture was worked up and purified by flash chromatography (silica gel, eluted with 10:1 petroleum ether:ethyl acetate) to afford **3o** (118.2 mg, 82% yield) as a colorless liquid. <sup>1</sup>H NMR (400 MHz, CDCl<sub>3</sub>)  $\delta$  6.19 (br s, 1H, -NH), 3.88 (s, 3H), 3.78 (s, 3H), 2.54 (t,  $J$  = 7.6 Hz, 2H), 1.54 (s, 9H), 1.50-1.38 (m, 11H), 1.33-1.21 (m, 6H), 0.86 (t,  $J$  = 7.6 Hz, 3H); <sup>13</sup>C{<sup>1</sup>H} NMR (100 MHz, CDCl<sub>3</sub>)  $\delta$  163.6, 163.0, 153.7, 147.2, 127.2, 124.1, 123.4, 115.5, 86.2, 81.0, 52.7, 51.6, 31.6, 29.7, 29.2, 28.1, 27.6, 24.2, 22.6, 14.1; HRMS (ESI)  $m/z$ : [M + H]<sup>+</sup> Calcd for C<sub>24</sub>H<sub>39</sub>N<sub>2</sub>O<sub>8</sub> 483.2701, found 483.2711.

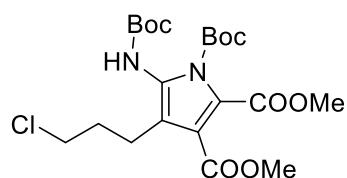

**2,3-Dibenzyl 1-(*tert*-butyl) 5-((*tert*-butoxycarbonyl)amino)-4-(3-chloropropyl)-1*H*-pyrrole-1,2,3-tricarboxylate (3p):** The representative procedure was followed using di-*tert*-butyl 1-(5-chloropent-1-yn-1-yl)hydrazine-1,2-dicarboxylate (66.6 mg, 0.2 mmol). Upon stirring at room temperature for 1 h, the reaction mixture was worked up and purified by flash chromatography (silica gel, eluted with 8:1 petroleum ether:ethyl acetate) to afford **3p** (78.8mg, 83% yield) as a colorless liquid. <sup>1</sup>H NMR (400 MHz, CDCl<sub>3</sub>)  $\delta$  6.31 (br s, 1H, -NH), 3.88 (s, 3H), 3.78 (s, 3H), 3.50 (t,  $J$  = 6.4 Hz, 2H), 2.71 (t,  $J$  = 6.4 Hz, 2H), 1.99 (tt,  $J$  = 6.4, 6.4 Hz, 2H), 1.53 (s, 9H), 1.45 (s, 9H); <sup>13</sup>C{<sup>1</sup>H} NMR (100 MHz, CDCl<sub>3</sub>)  $\delta$  163.4, 162.8, 153.7, 147.0,

127.6, 124.7, 121.3, 115.0, 86.5, 81.2, 52.8, 51.7, 44.8, 32.0, 28.1, 27.5, 21.6; HRMS (ESI)  $m/z$ :  $[M + H]^+$  Calcd for  $C_{21}H_{32}ClN_2O_8$  475.1842, found 475.1845.

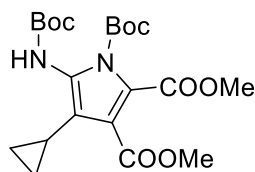

**1-(*tert*-Butyl) 2,3-dimethyl 5-((*tert*-butoxycarbonyl)amino)-4-cyclopropyl-1*H*-pyrrole-1,2,3-tricarboxylate (3q):** The representative procedure was followed using di-*tert*-butyl 1-(cyclopropylethynyl)hydrazine-1,2-dicarboxylate (88.9 mg, 0.3 mmol). Upon stirring at room temperature for 1.5 h, the reaction mixture was worked up and purified by flash chromatography (silica gel, eluted with 8:1 petroleum ether:ethyl acetate) to afford **3q** (114.1 mg, 87% yield) as a white solid, m.p. 119.4-121.0 °C.  $^1H$  NMR (400 MHz,  $CDCl_3$ )  $\delta$  6.80 (br s, 1H, -NH), 3.88 (s, 3H), 3.83 (s, 3H), 1.84-1.75 (m, 1H), 1.55 (s, 9H), 1.49 (s, 9H), 0.81-0.72 (m, 2H), 0.52-0.48 (m, 2H);  $^{13}C\{^1H\}$  NMR (100 MHz,  $CDCl_3$ )  $\delta$  163.8, 162.5, 152.7, 147.5, 126.2, 124.5, 120.3, 119.0, 86.5, 81.0, 52.6, 51.7, 28.1, 27.5, 6.9, 5.8; HRMS (ESI)  $m/z$ :  $[M + H]^+$  Calcd for  $C_{21}H_{31}N_2O_8$  439.2075, found 439.2076.

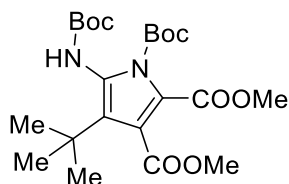

**1-(*tert*-Butyl) 2,3-dimethyl 5-((*tert*-butoxycarbonyl)amino)-4-(*tert*-butyl)-1*H*-pyrrole-1,2,3-tricarboxylate (3r):** The representative procedure was followed using 1-(3,3-dimethylbut-1-yn-1-yl)hydrazine-1,2-dicarboxylate (62.5 mg, 0.2 mmol) and dimethyl acetylenedicarboxylate (71.0 mg, 0.5 mmol, 2.5 equiv.). Upon stirring at room temperature for 1 h, the reaction mixture was worked up and purified by flash chromatography (silica gel, eluted with 10:1 petroleum ether:ethyl acetate) to afford **3r** (75.8 mg, 83% yield) as a white solid, m.p. 176.1-177.4 °C.  $^1H$  NMR (400 MHz,  $CDCl_3$ )  $\delta$  6.09 (br s, 1H, -NH), 3.84 (s, 3H), 3.81 (s, 3H), 1.54 (s, 9H), 1.45 (s, 9H), 1.31 (s, 9H);  $^{13}C\{^1H\}$  NMR (100 MHz,  $CDCl_3$ )  $\delta$  167.3, 160.1, 153.9,

147.6, 128.1, 124.5, 122.4, 120.3, 85.6, 81.1, 52.4, 52.1, 32.4, 30.4, 28.1, 27.3; HRMS (ESI)  $m/z$ :  $[M + H]^+$  Calcd for  $C_{22}H_{35}N_2O_8$  455.2388, found 455.2390.

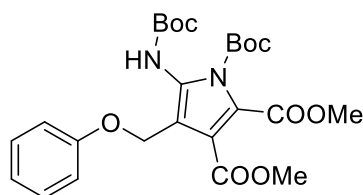

**1-((tert-Butyl) 2,3-dimethyl 5-((tert-butoxycarbonyl)amino)-4-(phenoxymethyl)-1H-pyrrole-1,2,3-tricarboxylate (3s):** The representative procedure was followed using di-*tert*-butyl 1-(3-phenoxyprop-1-yn-1-yl)hydrazine-1,2-dicarboxylate (72.5 mg, 0.2 mmol). Upon stirring at room temperature for 40 min, the reaction mixture was worked up and purified by preparative TLC (silica gel, eluted with 3:1 petroleum ether:ethyl acetate) to afford **3s** (49.4 mg, 49% yield) as a colorless liquid.  $^1H$  NMR (400 MHz,  $CDCl_3$ )  $\delta$  7.24 (dd,  $J = 7.2, 7.2$  Hz, 2H), 7.02-6.75 (m, 4H), 5.07 (s, 2H), 3.87 (s, 3H), 3.71 (s, 3H), 1.54 (s, 9H), 1.42 (s, 9H);  $^{13}C\{^1H\}$  NMR (100 MHz,  $CDCl_3$ )  $\delta$  163.2, 162.2, 158.7, 152.9, 147.3, 129.3, 127.0, 126.3, 120.7, 116.2, 114.8, 114.6, 87.0, 81.5, 60.7, 52.8, 51.9, 28.1, 27.5; HRMS (ESI)  $m/z$ :  $[M + H]^+$  Calcd for  $C_{25}H_{33}N_2O_9$  505.2181, found 505.2179.

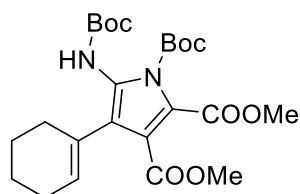

**1-((tert-Butyl) 2,3-dimethyl 5-((tert-butoxycarbonyl)amino)-4-(cyclohex-1-en-1-yl)-1H-pyrrole-1,2,3-tricarboxylate (3t):** The representative procedure was followed using di-*tert*-butyl 1-(cyclohex-1-en-1-ylethynyl)hydrazine-1,2-dicarboxylate (67.3 mg, 0.2 mmol). Upon stirring at room temperature for 1.5 h, the reaction mixture was worked up and purified by flash chromatography (silica gel, eluted with 10:1 petroleum ether:ethyl acetate) to afford **3t** (86.7 mg, 91% yield) as a colorless liquid.  $^1H$  NMR (400 MHz,  $CDCl_3$ )  $\delta$  6.30 (s, 1H, -NH), 5.57 (s, 1H), 3.86 (s, 3H), 3.75 (s, 3H), 2.21-2.12 (m, 2H), 2.12-2.03 (m, 2H), 1.73-1.56 (m, 4H), 1.52 (s, 9H), 1.42 (s, 9H);  $^{13}C\{^1H\}$  NMR (100 MHz,  $CDCl_3$ )  $\delta$  163.6, 162.5, 153.3, 147.3,

129.9, 127.2, 125.5, 124.6, 124.0, 116.7, 86.3, 80.8, 52.7, 51.8, 28.6, 28.1, 27.5, 25.5, 22.9, 22.0; HRMS (ESI)  $m/z$ :  $[M + H]^+$  Calcd for  $C_{24}H_{35}N_2O_8$  479.2388, found 479.2385.

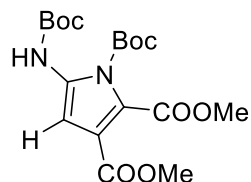

**1-((*tert*-Butyl) 2,3-dimethyl 5-((*tert*-butoxycarbonyl)amino)-1*H*-pyrrole-1,2,3-tricarboxylate (3u):** The representative procedure was followed using di-*tert*-butyl 1-ethynylhydrazine-1,2-dicarboxylate (76.9 mg, 0.3 mmol). Upon stirring at room temperature for 40 min, the reaction mixture was worked up and purified by preparative TLC (silica gel, 12:1 petroleum ether:ethyl acetate) to afford **3u** (61.2 mg, 51% yield) as a colorless liquid.  $^1H$  NMR (400 MHz,  $CDCl_3$ )  $\delta$  8.81 (s, 1H, -NH), 6.65 (s, 1H), 3.88 (s, 3H), 3.77 (s, 3H), 1.55 (s, 9H), 1.49 (s, 9H);  $^{13}C\{^1H\}$  NMR (100 MHz,  $CDCl_3$ )  $\delta$  163.2, 162.7, 151.2, 149.2, 131.8, 122.4, 118.5, 96.7, 87.8, 81.3, 52.7, 51.7, 28.1, 27.5; HRMS (ESI)  $m/z$ :  $[M + H]^+$  Calcd for  $C_{18}H_{27}N_2O_8$  399.1762, found 399.1765.

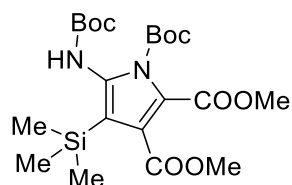

**1-((*tert*-Butyl) 2,3-dimethyl 5-((*tert*-butoxycarbonyl)amino)-4-(trimethylsilyl)-1*H*-pyrrole-1,2,3-tricarboxylate (3v):** The representative procedure was followed using di-*tert*-butyl 1-((trimethylsilyl)ethynyl)hydrazine-1,2-dicarboxylate (65.7 mg, 0.2 mmol). Upon stirring at room temperature for 2 h, the reaction mixture was worked up and purified by flash chromatography (silica gel, eluted with 10:1 petroleum ether:ethyl acetate) to afford **3v** (75.2 mg, 80% yield) as a white solid, m.p. 133.2-134.4 °C.  $^1H$  NMR (400 MHz,  $CDCl_3$ )  $\delta$  6.82 (s, 1H, -NH), 3.87 (s, 3H), 3.80 (s, 3H), 1.55 (s, 9H), 1.47 (s, 9H), 0.24 (s, 9H);  $^{13}C\{^1H\}$  NMR (100 MHz,  $CDCl_3$ )  $\delta$  164.6, 162.4, 153.7, 147.5, 132.4, 126.7, 122.5, 115.3, 86.4, 81.1, 52.6, 51.6, 28.2, 27.5, -0.4; HRMS (ESI)  $m/z$ :  $[M + H]^+$  Calcd for  $C_{21}H_{35}N_2O_8Si$  471.2157, found 471.2156.



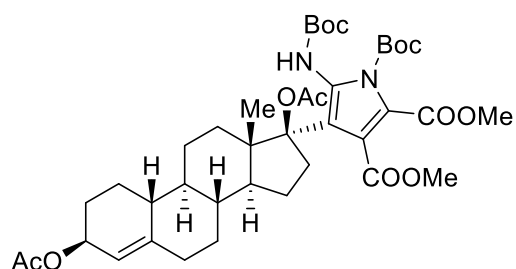

**Ethynodiol diacetate derivative (3w):** The representative procedure was followed using ethynodiol diacetate derivatived ynehydrazide (123 mg, 0.2 mmol). Upon stirring at room temperature for 4 h, the reaction mixture was worked up and purified by flash chromatography (silica gel, eluted with 2:1 petroleum ether:ethyl acetate) to afford **3w** (103.6 mg, 68% yield) as a white solid, m.p. 148.2-149.6 °C.  $^1\text{H}$  NMR (400 MHz,  $\text{CDCl}_3$ )  $\delta$  6.32-5.85 (m, 1H, -NH), 5.35-5.23 (m, 1H), 5.23-5.12 (m, 1H), 3.79 (br s, 6H), 3.05-2.73 (m, 1H), 2.33-2.13 (m, 1H), 2.11-0.82 (m, 44H), 0.71-0.46 (m, 1H);  $^{13}\text{C}\{^1\text{H}\}$  NMR (100 MHz,  $\text{CDCl}_3$ )  $\delta$  170.8, 169.9, 165.9, 159.9, 154.3, 147.1, 144.9, 125.4, 122.3, 121.9, 121.7, 119.6, 90.2, 85.7, 81.0, 70.4, 52.2, 52.1, 49.3, 48.1, 45.6, 41.7, 41.3, 35.7, 35.0, 33.2, 31.2, 28.3, 27.7, 27.5, 27.2, 25.7, 24.8, 24.3, 21.5, 21.4, 14.7; HRMS (ESI)  $m/z$ :  $[\text{M} + \text{H}]^+$  Calcd for  $\text{C}_{40}\text{H}_{56}\text{N}_2\text{O}_{12}$  757.3906, found 757.3908.

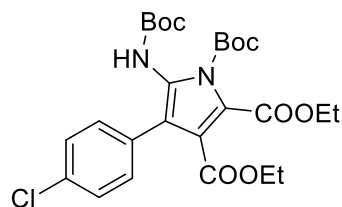

**1-(*tert*-Butyl) 2,3-diethyl 5-((*tert*-butoxycarbonyl)amino)-4-(4-chlorophenyl)-1H-pyrrole-1,2,3-tricarboxylate (5a):** The representative procedure was followed using di-*tert*-butyl 1-((4-chlorophenyl)ethynyl)hydrazine-1,2-dicarboxylate (73.4 mg, 0.2 mmol) and diethyl acetylenedicarboxylate (54.5 mg, 0.32 mmol, 1.6 equiv.). Upon stirring at room temperature for 1.5 h, the reaction mixture was worked up and purified by flash chromatography (silica gel, eluted with 10:1 petroleum ether:ethyl acetate) to afford **5a** (88.3 mg, 82% yield) as a white solid, m.p. 136.5-137.7 °C.  $^1\text{H}$  NMR (400 MHz,  $\text{CDCl}_3$ )  $\delta$  7.31 (d,  $J$  = 8.4 Hz, 2H), 7.27 (d,  $J$  = 8.4 Hz, 2H), 6.28 (s, 1H), 4.36 (q,  $J$  = 7.2 Hz, 2H), 4.13 (q,  $J$  = 7.2 Hz, 2H), 1.57 (s, 9H), 1.37 (d,  $J$  = 7.2 Hz, 3H), 1.32 (s, 9H), 1.13 (t,  $J$  = 7.2 Hz, 3H);  $^{13}\text{C}\{^1\text{H}\}$  NMR (100 MHz,  $\text{CDCl}_3$ )

$\delta$  163.0, 161.5, 153.1, 147.2, 133.3, 131.1, 130.6, 128.0, 125.8, 125.0, 121.0, 117.2, 86.8, 81.3, 61.9, 60.8, 27.9, 27.5, 13.9, 13.8; HRMS (ESI)  $m/z$ :  $[M + H]^+$  Calcd for  $C_{26}H_{34}ClN_2O_8$  537.1998, found 537.1996.

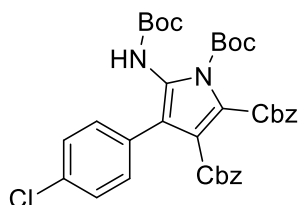

**2,3-Dibenzyl 1-(tert-butyl) 5-((tert-butoxycarbonyl)amino)-4-(4-chlorophenyl)-1H-pyrrole-1,2,3-tricarboxylate (5b):** The representative procedure was followed using di-*tert*-butyl 1-((4-chlorophenyl)ethynyl)hydrazine-1,2-dicarboxylate (73.4 mg, 0.2 mmol), TMEDA (4.6 mg, 0.04 mmol, 0.2 equiv.) and dibenzyl acetylenedicarboxylate (94.2 mg, 0.32 mmol, 1.6 equiv.). Upon stirring at room temperature for 30 min, the reaction mixture was worked up and purified by flash chromatography (silica gel, eluted with 15:1 petroleum ether:ethyl acetate) to afford **5b** (97.2mg, 73% yield) as a brown liquid.  $^1H$  NMR (400 MHz,  $CDCl_3$ )  $\delta$  7.29-7.12 (m, 12H), 7.02-6.97 (m, 2H), 6.23 (s, 1H, -NH), 5.04 (s, 2H), 4.92 (s, 2H), 1.45 (s, 9H), 1.24 (br s, 9H);  $^{13}C\{^1H\}$  NMR (100 MHz,  $CDCl_3$ )  $\delta$  162.7, 161.2, 153.0, 147.2, 135.1, 134.9, 133.3, 131.0, 130.3, 128.4, 128.34, 128.31, 128.2, 128.1, 128.0, 125.4, 125.2, 121.1, 117.3, 86.9, 81.3, 67.8, 66.7, 27.9, 27.5; HRMS (ESI)  $m/z$ :  $[M + H]^+$  Calcd for  $C_{36}H_{38}ClN_2O_8$  661.2311, found 661.2310.

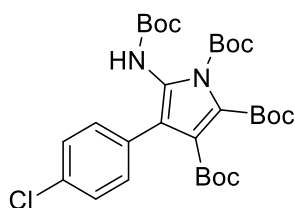

**Tri-*tert*-butyl 5-((tert-butoxycarbonyl)amino)-4-(4-chlorophenyl)-1H-pyrrole-1,2,3-tricarboxylate (5c):** The representative procedure was followed using di-*tert*-butyl 1-((4-chlorophenyl)ethynyl)hydrazine-1,2-dicarboxylate (73.4 mg, 0.2 mmol), TMEDA (6.9 mg, 0.06 mmol, 0.3 equiv.) and di-*tert*-butyl acetylenedicarboxylate (72.4 mg, 0.32 mmol, 1.6 equiv.). Upon stirring at room temperature for 24 h, the reaction mixture was worked up and

purified by flash chromatography (silica gel, eluted with 15:1 petroleum ether:ethyl acetate) to afford **5c** (47.5 mg, 40% yield) as a white solid, m.p. 172.6-173.4 °C. <sup>1</sup>H NMR (400 MHz, CDCl<sub>3</sub>) δ 7.33 (d, *J* = 8.4 Hz, 2H), 7.27 (d, *J* = 8.4 Hz, 2H), 6.20 (s, 1H, -NH), 1.59 (s, 9H), 1.58 (s, 9H), 1.35 (br s, 9H), 1.30 (s, 9H); <sup>13</sup>C{<sup>1</sup>H} NMR (100 MHz, CDCl<sub>3</sub>) δ 162.6, 159.4, 153.3, 147.7, 133.1, 131.1, 131.0, 127.9, 124.7, 124.5, 121.0, 120.3, 86.1, 82.7, 81.5, 81.2, 28.0, 27.8, 27.5; HRMS (ESI) *m/z*: [M + H]<sup>+</sup> Calcd for C<sub>30</sub>H<sub>42</sub>ClN<sub>2</sub>O<sub>8</sub> 593.2624, found 593.2623.

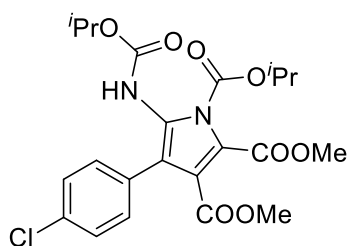

**2,3-Dimethyl 1-propyl 4-(4-chlorophenyl)-5-((propoxycarbonyl)amino)-1H-pyrrole-1,2,3-tricarboxylate (5d):** The representative procedure was followed using dipropyl 1-((4-chlorophenyl)ethynyl)hydrazine-1,2-dicarboxylate (67.8 mg, 0.2 mmol) and TMEDA (2.3 mg, 0.02 mmol, 0.1 equiv.). Upon stirring at room temperature for 1 h, the reaction mixture was worked up and purified by flash chromatography (silica gel, eluted with 8:1 petroleum ether:ethyl acetate) to afford **5d** (70.4 mg, 73% yield) as a yellow liquid. <sup>1</sup>H NMR (400 MHz, CDCl<sub>3</sub>) δ 7.31 (d, *J* = 8.8 Hz, 2H), 7.24 (d, *J* = 8.8 Hz, 2H), 6.48 (s, 1H, -NH), 5.15 (hept, *J* = 6.4 Hz, 1H), 4.81 (hept, *J* = 6.4 Hz, 1H), 3.91 (s, 3H), 3.66 (s, 3H), 1.35 (d, *J* = 6.4 Hz, 6H), 1.20-1.05 (m, 6H); <sup>13</sup>C{<sup>1</sup>H} NMR (100 MHz, CDCl<sub>3</sub>) δ 163.1, 162.0, 153.9, 148.2, 133.5, 131.0, 130.0, 128.0, 126.4, 124.7, 121.8, 116.8, 74.2, 69.8, 52.9, 51.8, 21.7, 21.3; HRMS (ESI) *m/z*: [M + H]<sup>+</sup> Calcd for C<sub>22</sub>H<sub>26</sub>ClN<sub>2</sub>O<sub>8</sub> 481.1372, found 481.1381.

## V. Synthetic applications

### a. Gram-scale experiment:

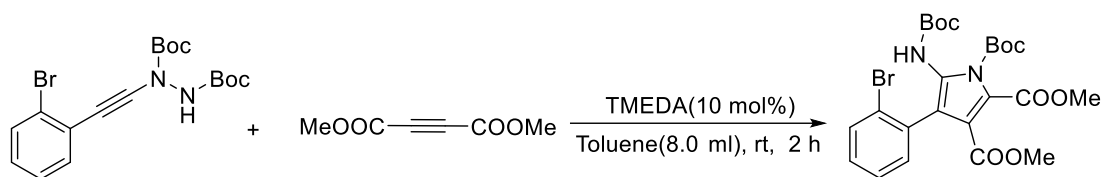

In a 25 mL round-bottomed flask, di-*tert*-butyl 1-((2-bromophenyl)ethynyl)hydrazine-1,2-dicarboxylate (658.1 mg, 1.6 mmol, 1.0 equiv.), toluene (8.0 ml), dimethyl acetylenedicarboxylate (363.8 mg, 2.56 mmol, 1.6 equiv.), TMEDA (18.5 mg, 0.16 mmol, 10 mol%) were added successively. The reaction mixture is stirred rapidly at room temperature for 2 h and diluted with ethyl acetate (15.0 mL), then saturated aq. water (20.0 mL) was added. The aqueous layer was extracted with ethyl acetate (3 × 15 mL). The combined organic layer was washed with brine (15.0 mL), dried over Na<sub>2</sub>SO<sub>4</sub>, filtered, and concentrated. The crude product was purified by flash chromatography (eluted with 8:1 petroleum ether:ethyl acetate) to afford the **3d** (669 mg, 75%) as a white solid.

#### b. Synthetic applications:

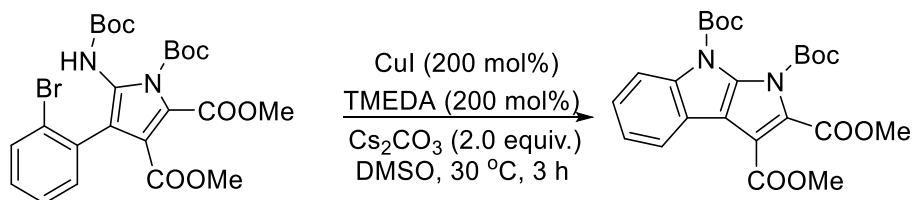

**1,8-Di-*tert*-butyl 2,3-dimethyl pyrrolo[2,3-*b*]indole-1,2,3,8-tetracarboxylate (6):** In a 15 mL oven-dried resealable screw-cap test tube, **3d** (110.7 mg, 0.2 mmol), cuprous iodide (76.2 mg, 0.4 mmol, 200 mol%) and cesium carbonate (130.4 mg, 0.4 mmol, 2.0 equiv.) were added. The tube was evacuated and backfilled with argon. Dimethyl sulfoxide (2.0 mL), TMEDA (46.4 mg, 0.4 mmol, 200 mol%) were added via syringe. The reaction mixture was stirred at 30 °C for 3 h, then quenched with water (6.0 mL) and extracted with ethyl acetate (3×10 mL). The combined organic phases were washed with brine (3×10 mL), dried over Na<sub>2</sub>SO<sub>4</sub>, filtered, and concentrated in vacuo. The crude product was purified by flash chromatography (silica gel, eluted with 15:1 petroleum ether:ethyl acetate) to afford **6** (79.5 mg, 84% yield) as a yellow liquid. <sup>1</sup>H NMR (400 MHz, CDCl<sub>3</sub>) δ 8.00-7.95 (m, 1H), 7.92-7.85 (m, 1H), 7.28-7.19 (m, 2H),

3.90 (s, 6H), 1.58 (s, 9H), 1.54 (s, 9H);  $^{13}\text{C}\{^1\text{H}\}$  NMR (100 MHz,  $\text{CDCl}_3$ )  $\delta$  163.5, 162.1, 149.5, 147.0, 139.8, 134.7, 128.5, 124.4, 123.6, 122.6, 121.2, 115.5, 111.4, 110.4, 86.7, 84.8, 52.9, 51.9, 28.1, 27.5; HRMS (ESI)  $m/z$ :  $[\text{M} + \text{H}]^+$  Calcd for  $\text{C}_{24}\text{H}_{29}\text{N}_2\text{O}_8$  473.1918, found 473.1924.

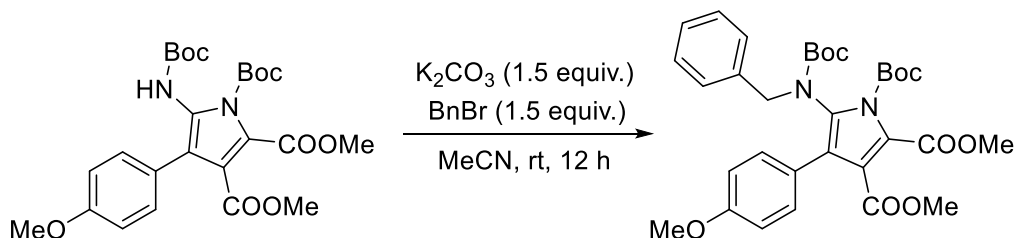

**1-(tert-butyl) 2,3-dimethyl 5-(benzyl(tert-butoxycarbonyl)amino)-4-(4-methoxyphenyl)-1H-pyrrole-1,2,3-tricarboxylate (7a):** In a 15 mL oven-dried resealable screw-cap test tube, a mixture of **3f** (100.9 mg, 0.2 mmol) and benzyl bromide (51.3 mg, 0.3 mmol, 1.5 equiv.), potassium carbonate (41.5 mg, 0.3 mmol, 1.5 equiv.) in acetonitrile (1.0 mL) was prepared. The reaction was stirred at room temperature for 12 h. The reaction was diluted with water (5.0 mL) and extracted with ethyl acetate ( $3 \times 10$  mL). The combined organic phases were washed with brine ( $3 \times 10$  mL), dried over  $\text{Na}_2\text{SO}_4$ , filtered, and concentrated in vacuo. The crude product was purified by flash chromatography (silica gel, eluted with 6:1 petroleum ether:ethyl acetate) to afford **7a** (105.4 mg, 88% yield) as a white solid, m.p. 144.5-146.2 °C.  $^1\text{H}$  NMR (400 MHz,  $\text{CDCl}_3$ )  $\delta$  7.13-6.67 (m, 9H), 4.62-4.50 (m, 1H), 4.23-4.09 (m, 1H), 3.93-3.88 (m, 3H), 3.83-3.78 (m, 3H), 3.63 (s, 3H), 1.52 (s, 9H), 1.50-1.43 (m, 9H);  $^{13}\text{C}\{^1\text{H}\}$  NMR (100 MHz,  $\text{CDCl}_3$ )  $\delta$  163.6, 162.4, 158.8, 155.1, 146.6, 136.0, 130.8, 130.5, 129.0, 128.3, 127.9, 127.8, 127.1, 126.9, 126.5, 123.6, 122.6, 116.6, 133.1, 86.3, 81.2, 55.1, 53.2, 52.7, 51.7, 28.3, 27.6; HRMS (ESI)  $m/z$ :  $[\text{M} + \text{H}]^+$  Calcd for  $\text{C}_{32}\text{H}_{39}\text{N}_2\text{O}_9$  595.2650, found 595.2649.

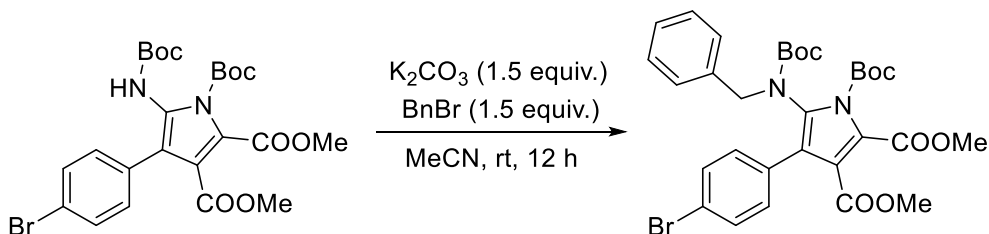

**1-(tert-butyl) 2,3-dimethyl 5-(benzyl(tert-butoxycarbonyl)amino)-4-(4-bromophenyl)-1H-pyrrole-1,2,3-tricarboxylate (7b):** In a 15 mL oven-dried resealable screw-cap test tube, a mixture of **3c** (442.7 mg, 0.8 mmol) and benzyl bromide (205.2 mg, 1.2 mmol, 1.5 equiv.),

potassium carbonate (165.9 mg, 1.2 mmol, 1.5 equiv.) in acetonitrile (4.0 mL) was prepared. The reaction was stirred at room temperature for 12 h. The reaction was diluted with water (10.0 mL) and extracted with ethyl acetate (3 × 15 mL). The combined organic phases were washed with brine (3 × 10 mL), dried over Na<sub>2</sub>SO<sub>4</sub>, filtered, and concentrated in vacuo. The crude product was purified by flash chromatography (silica gel, eluted with 9:1 petroleum ether:ethyl acetate) to afford **7b** (459.9 mg, 89% yield) as a white foam. <sup>1</sup>H NMR (400 MHz, CDCl<sub>3</sub>) δ 7.28-7.19 (m, 2H), 7.16-7.06 (m, 1H), 7.06-6.97 (m, 2H), 6.87-6.79 (m, 2H), 6.71 (d, *J* = 8.4 Hz, 2H), 4.88-4.68 (m, 1H), 4.07-3.99 (m, 1H), 3.96-3.89 (m, 3H), 3.62 (s, 3H), 1.60-1.54 (m, 9H), 1.52-1.44 (m, 9H); <sup>13</sup>C {<sup>1</sup>H} NMR (100 MHz, CDCl<sub>3</sub>) δ 163.2, 162.3, 154.9, 146.6, 135.8, 131.3, 130.9, 130.6, 128.9, 128.3, 128.0, 127.9, 127.2, 122.2, 121.5, 115.8, 86.8, 81.4, 53.3, 52.9, 51.7, 28.3, 27.6; HRMS (ESI) *m/z*: [M + Na]<sup>+</sup> Calcd for C<sub>31</sub>H<sub>35</sub>BrN<sub>2</sub>NaO<sub>8</sub> 665.1469, found 665.1463.

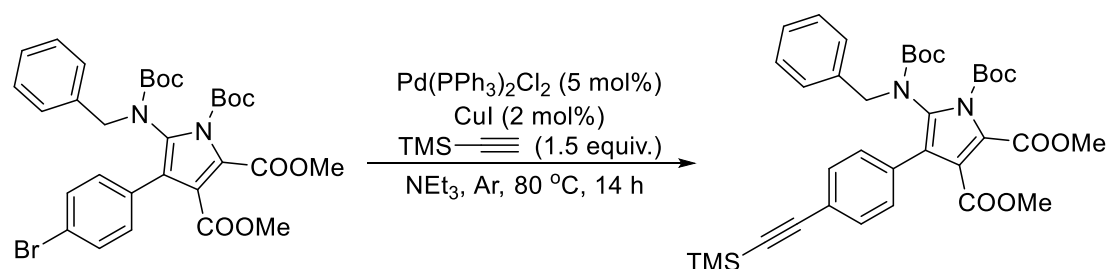

**1-(*tert*-butyl) 2,3-dimethyl 5-(benzyl(*tert*-butoxycarbonyl)amino)-4-(4-((trimethylsilyl)ethynyl)phenyl)-1*H*-pyrrole-1,2,3-tricarboxylate (8):** In a 15 mL oven-dried resealable screw-cap test tube, **7b** (64.4 mg, 0.1 mmol), cuprous iodide (0.38 mg, 0.002 mmol, 2 mol%) and bis(triphenylphosphine)palladium(II) dichloride (3.5 mg, 0.005 mmol, 5 mol%) were added. The tube was evacuated and backfilled with argon. Triethylamine (1.0 mL) and ethynyltrimethylsilane (14.7 mg, 0.15 mmol, 1.5 equiv.) were added via syringe. The reaction mixture was stirred at 80 °C for 14 h, The reaction mixture was carefully filtered through the Celite, and washed with ethyl acetate (30 mL). The combined filtrates were concentrated under reduced pressure to obtain a crude product. The crude product was purified by flash chromatography (silica gel, eluted with 40:1 petroleum ether:ethyl acetate) to afford **8** (50.3 mg, 76% yield) as a yellow foam. <sup>1</sup>H NMR (400 MHz, CDCl<sub>3</sub>) δ 7.30-7.21 (m, 2H), 7.16-7.08 (m, 1H), 7.07-6.98 (m, 2H), 6.97-6.69 (m, 4H), 4.73-4.54 (m, 1H), 4.12 (d, *J* = 14.4 Hz,

1H), 3.97-3.87 (m, 3H), 3.59 (s, 3H), 1.57-1.52 (m, 9H), 1.52-1.42 (m, 9H), 0.31-0.22 (m, 9H);  $^{13}\text{C}\{^1\text{H}\}$  NMR (100 MHz,  $\text{CDCl}_3$ )  $\delta$  163.3, 162.2, 155.3, 154.9, 146.6, 135.7, 131.8, 131.1, 129.5, 129.2, 129.1, 128.1, 127.3, 122.4, 121.9, 116.2, 105.1, 94.3, 86.6, 81.4, 53.2, 52.8, 51.7, 28.3, 27.6, 0.0; HRMS (ESI)  $m/z$ :  $[\text{M} + \text{Na}]^+$  Calcd for  $\text{C}_{36}\text{H}_{44}\text{N}_2\text{NaO}_8\text{Si}$  683.2759, found 683.2758.

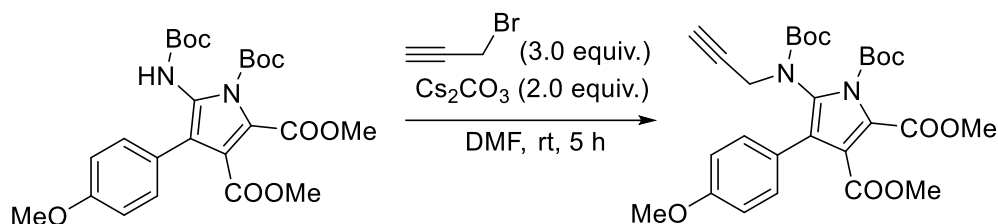

**1-(*tert*-butyl) 2,3-dimethyl 5-((*tert*-butoxycarbonyl)(prop-2-yn-1-yl)amino)-4-(4-methoxyphenyl)-1H-pyrrole-1,2,3-tricarboxylate (9):** In a 15 mL oven-dried resealable screw-cap test tube, a mixture of **3f** (201.8 mg, 0.4 mmol) and propargyl bromide (142.7 mg, 1.2 mmol, 3.0 equiv.), cesium carbonate (260.6 mg, 0.8 mmol, 2.0 equiv.) in N,N-dimethylformamide (2.0 mL) was prepared. The reaction was stirred at room temperature for 5 h. The reaction was diluted with water (10 mL) and extracted with EtOAc (3  $\times$  10 mL). The combined organic phases were washed with brine (3  $\times$  10 mL), dried over  $\text{Na}_2\text{SO}_4$ , filtered, and concentrated in vacuo. The crude product was purified by flash chromatography (silica gel, eluted with 8:1 petroleum ether:ethyl acetate) to afford **9** (181.7 mg, 83% yield) as a white solid, m.p. 110.3-111.5  $^\circ\text{C}$ .  $^1\text{H}$  NMR (400 MHz,  $\text{CDCl}_3$ )  $\delta$  7.26-7.19 (m, 2H), 6.91-6.83 (m, 2H), 4.28-4.00 (m, 1H), 3.97-3.85 (m, 4H), 3.82 (s, 3H), 3.71-3.65 (m, 3H), 2.07-1.95 (m, 1H,  $-\text{C}\equiv\text{CH}$ ), 1.62-1.53 (m, 9H), 1.52-1.36 (m, 9H);  $^{13}\text{C}\{^1\text{H}\}$  NMR (100 MHz,  $\text{CDCl}_3$ )  $\delta$  163.5, 162.5, 159.1, 153.9, 146.8, 130.7, 127.8, 127.1, 123.6, 123.4, 116.0, 113.3, 86.4, 81.6, 77.6, 73.2, 55.1, 52.8, 51.7, 38.5, 28.2, 27.6; HRMS (ESI)  $m/z$ :  $[\text{M} + \text{Na}]^+$  Calcd for  $\text{C}_{28}\text{H}_{34}\text{N}_2\text{NaO}_9$  565.2157, found 565.2157.

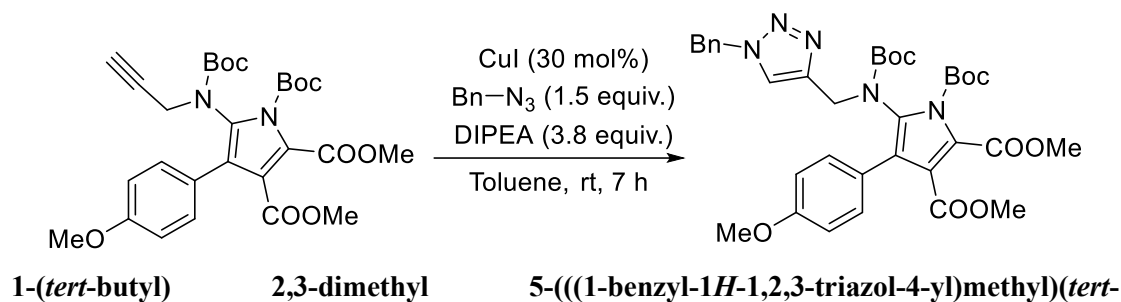

In a 15 mL oven-dried resealable screw-cap test tube, a mixture of **9** (54.3 mg, 0.1 mmol) and benzyl azide (20.0 mg, 0.15 mmol, 1.5 equiv.), *N,N*-diisopropylethylamine (DIPEA, 49.1 mg, 0.38 mmol, 3.8 equiv.), cuprous iodide (5.7 mg, 0.03 mmol, 30 mol%) in toluene (1.0 mL) was prepared. The reaction was stirred at room temperature for 7 h. The reaction mixture was diluted with aqueous sodium bicarbonate solution (10 mL) and extracted with ethyl acetate (3 × 10 mL). The combined organic phases were washed with brine (3 × 10 mL), dried over Na<sub>2</sub>SO<sub>4</sub>, filtered, and concentrated in vacuo. The crude product was purified by flash chromatography (silica gel, eluted with 2:1 petroleum ether:ethyl acetate) to afford **10** (57.9 mg, 85% yield) as a white foam. <sup>1</sup>H NMR (400 MHz, CDCl<sub>3</sub>) δ 7.38-7.29 (m, 3H), 7.19-6.93 (m, 4H), 6.84-6.73 (m, 2H), 6.72-6.15 (m, 1H), 5.45-5.37 (m, 1H), 5.15-5.05 (m, 1H), 4.85-4.69 (m, 1H), 4.35-4.19 (m, 1H), 3.97-3.89 (m, 3H), 3.86-3.81 (m, 3H), 3.64 (s, 3H), 1.55 (s, 9H), 1.48-1.29 (m, 9H); <sup>13</sup>C{<sup>1</sup>H} NMR (100 MHz, CDCl<sub>3</sub>) δ 163.2, 162.3, 158.7, 154.9, 146.7, 143.8, 134.8, 134.6, 130.7, 128.9, 128.5, 127.8, 127.2, 124.0, 122.9, 122.8, 116.0, 112.9, 86.5, 81.5, 55.1, 53.7, 52.8, 51.7, 45.2, 28.3, 27.6; HRMS (ESI) *m/z*: [M + Na]<sup>+</sup> Calcd for C<sub>35</sub>H<sub>41</sub>N<sub>5</sub>NaO<sub>9</sub> 698.2796, found 698.2788.

### c. Direct synthesis of pyrrole from terminal alkynes:

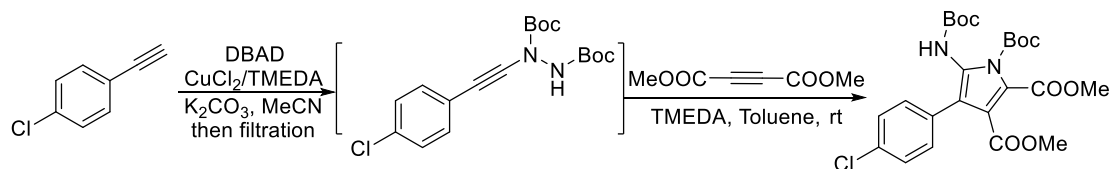

In a 15 mL resealable screw-cap test tube, potassium carbonate (11.0 mg, 0.08 mmol, 0.2 equiv.), di-*tert*-butyl azodicarboxylate (138.4 mg, 0.6 mmol, 1.5 equiv.), 1-chloro-4-ethynylbenzene (54.6 mg, 0.4 mmol), cupric chloride anhydrous (10.8 mg, 0.08 mmol, 20 mol%) were added successively. The tube was evacuated and backfilled with argon (this



process was repeated for 3 times). Anhydrous MeCN (1.0 mL), TMEDA (9.3 mg, 0.08 mmol, 20 mol%) were added under argon atmosphere. The reaction mixture was stirred vigorously at 30 °C for 6 h. The reaction mixture was carefully filtered through the silica gel under vacuum conditions, and washed with ethyl acetate (20 mL). The combined filtrates were concentrated under reduced pressure to obtain a crude product. The crude product was placed in a new tube, toluene (1.0 mL), dimethyl acetylenedicarboxylate (79.6 mg, 0.56 mmol, 1.4 equiv.), TMEDA (4.6 mg, 0.04 mmol, 10 mol%) were added successively. The reaction mixture is stirred rapidly at room temperature until the end of the reaction and diluted with ethyl acetate (4 mL), then saturated aq. water (4.0 mL) was added. The aqueous layer was extracted with ethyl acetate (3 × 6 mL). The combined organic layer was washed with brine (15.0 mL), dried over Na<sub>2</sub>SO<sub>4</sub>, filtered, and concentrated. The crude product was purified by flash chromatography (eluted with 8:1 petroleum ether:ethyl acetate) to afford the **3a** (101.7 mg, 49%) as a white solid.

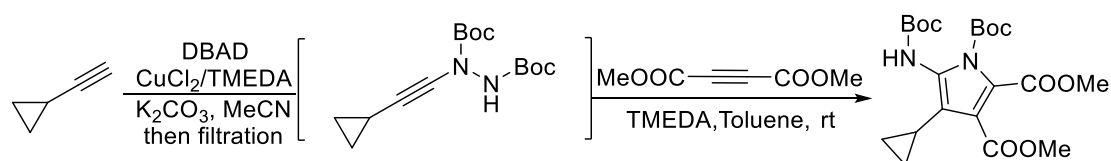

In a 15 mL resealable screw-cap test tube, potassium carbonate (11.0 mg, 0.08 mmol, 0.2 equiv.), di-*tert*-butyl azodicarboxylate (138.4 mg, 0.6 mmol, 1.5 equiv.), ethynylcyclopropane (26.4 mg, 0.4 mmol), cupric chloride anhydrous (10.8 mg, 0.08 mmol, 0.2 equiv.) were added successively. The tube was evacuated and backfilled with argon (this process was repeated for 3 times). Anhydrous MeCN (1.0 mL), TMEDA (9.3 mg 0.08 mmol, 20 mol%) were added under argon atmosphere. The reaction mixture was stirred vigorously at 30 °C for 6 h. The reaction mixture was carefully filtered through the silica gel under vacuum conditions, and washed with ethyl acetate (20 mL). The combined filtrates were concentrated under reduced pressure to obtain a crude product. The crude product was placed in a new tube, toluene (1.0 mL), dimethyl acetylenedicarboxylate (79.6 mg, 0.56 mmol, 1.4 equiv.), TMEDA (4.6 mg, 0.04 mmol, 10 mol%) were added successively. The reaction mixture is stirred rapidly at room temperature until the end of the reaction and diluted with ethyl acetate (4.0 mL), then saturated aq. water (4.0 mL) was added. The aqueous layer was extracted with ethyl acetate (3 × 6 mL). The combined organic layer was washed with brine (15 mL), dried over Na<sub>2</sub>SO<sub>4</sub>, filtered, and

concentrated. The crude product was purified by flash chromatography (eluted with 8:1 petroleum ether:ethyl acetate) to afford the **3q** (84.9 mg, 48%) as a white solid.

## VI. Mechanism studies

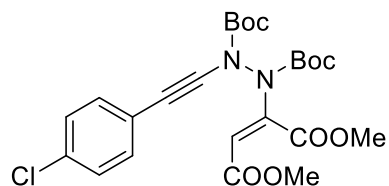

**Di-tert-butyl (E)-1-((4-chlorophenyl)ethynyl)-2-(1,4-dimethoxy-1,4-dioxobut-2-en-2-yl)hydrazine-1,2-dicarboxylate (4a):** The representative procedure was followed with the following modifications: di-*tert*-butyl 1-((4-chlorophenyl)ethynyl)hydrazine-1,2-dicarboxylate (73.4 mg, 0.2 mmol), cesium carbonate (6.5 mg, 0.02 mmol, 0.1 equiv.), ethyl acetate (1.0 mL) and dimethyl acetylenedicarboxylate (45.5 mg, 0.32 mmol, 1.6 equiv.). Upon stirring at room temperature for 3 h, the reaction mixture was worked up and purified by flash chromatography (silica gel, eluted with 10:1 petroleum ether:ethyl acetate) to afford **4a** (59 mg, 58% yield) as a yellow liquid.  $^1\text{H}$  NMR (400 MHz,  $\text{CDCl}_3$ )  $\delta$  7.32-7.18 (m, 4H), 5.69-5.53 (m, 1H), 3.85 (s, 3H), 3.65 (s, 3H), 1.56-1.35 (m, 18H);  $^{13}\text{C}\{^1\text{H}\}$  NMR (100 MHz,  $\text{CDCl}_3$ )  $\delta$  165.4, 162.4, 150.5, 148.8, 144.0, 134.2, 132.8, 128.6, 120.4, 102.3, 85.7, 85.6, 80.3, 72.4, 53.0, 51.8, 27.8, 27.7; HRMS (ESI)  $m/z$ :  $[\text{M} + \text{H}]^+$  Calcd for  $\text{C}_{24}\text{H}_{30}\text{ClN}_2\text{O}_8$  509.1685, found 509.1692.

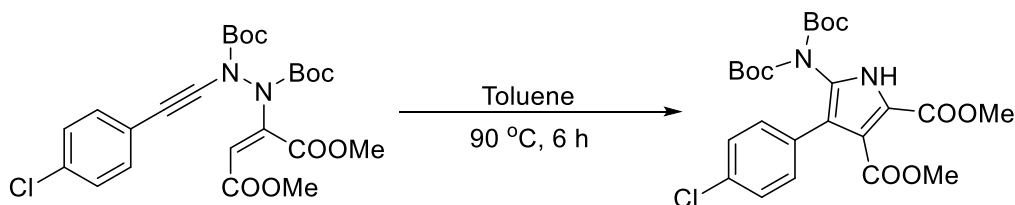

**1,2-Bis(*tert*-butoxycarbonyl)-5-(4-chlorophenyl)-3,4-bis(methoxycarbonyl)-1H-pyrrole (11):** In a 15 mL oven-dried resealable screw-cap test tube, **4a** (50.9 mg, 0.1 mmol) and toluene (1.0 mL) were mixed. The reaction was stirred at 90 °C for 6 h. After the reaction mixture was cooled to room temperature, the crude product was concentrated in vacuo and purified by flash

chromatography (silica gel, eluted with 4:1 petroleum ether:ethyl acetate) to afford **11** (33 mg, 65% yield) as a colorless liquid.  $^1\text{H}$  NMR (400 MHz,  $\text{CDCl}_3$ )  $\delta$  10.18 (s, 1H, -NH), 7.33 (d,  $J$  = 8.5 Hz, 2H), 7.21 (d,  $J$  = 8.5 Hz, 2H), 3.91 (s, 3H), 3.76 (s, 3H), 1.32 (s, 18H);  $^{13}\text{C}\{^1\text{H}\}$  NMR (100 MHz,  $\text{CDCl}_3$ )  $\delta$  165.5, 160.8, 150.0, 133.4, 130.5, 129.7, 128.7, 126.5, 120.4, 120.2, 117.9, 83.9, 52.5, 52.2, 27.6; HRMS (ESI)  $m/z$ :  $[\text{M} + \text{H}]^+$  Calcd for  $\text{C}_{24}\text{H}_{30}\text{ClN}_2\text{O}_8$  509.1685, found 509.1695.

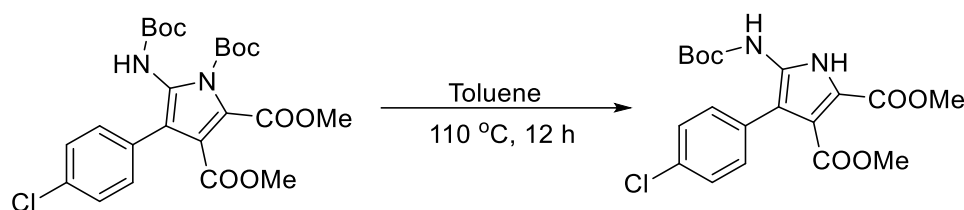

**Dimethyl 5-((tert-butoxycarbonyl)amino)-4-(4-chlorophenyl)-1H-pyrrole-2,3-dicarboxylate (12):** In a 15 mL oven-dried resealable screw-cap test tube, **3a** (50.9 mg, 0.1 mmol) and toluene (1.0 mL) were mixed. The reaction was stirred at 110 °C for 12 h. After the reaction mixture was cooled to room temperature, the crude product was concentrated in vacuo and purified by flash chromatography (silica gel, eluted with 6:1 petroleum ether:ethyl acetate) to afford **12** (33 mg, 81% yield) as a white solid, m.p. 147.5-149.0 °C.  $^1\text{H}$  NMR (400 MHz,  $\text{CDCl}_3$ )  $\delta$  10.68 (s, 1H, -NH), 7.39 (d,  $J$  = 8.4 Hz, 2H), 7.24 (d,  $J$  = 8.4 Hz, 2H), 6.84 (s, 1H, -NH<sub>Boc</sub>), 3.85 (s, 3H), 3.76 (s, 3H), 1.51 (s, 9H);  $^{13}\text{C}\{^1\text{H}\}$  NMR (100 MHz,  $\text{CDCl}_3$ )  $\delta$  165.7, 159.7, 152.5, 133.4, 130.4, 130.1, 129.3, 128.8, 120.8, 114.3, 108.1, 82.9, 52.3, 51.8, 28.1; HRMS (ESI)  $m/z$ :  $[\text{M} + \text{H}]^+$  Calcd for  $\text{C}_{19}\text{H}_{22}\text{ClN}_2\text{O}_6$  409.1161, found 409.1156.

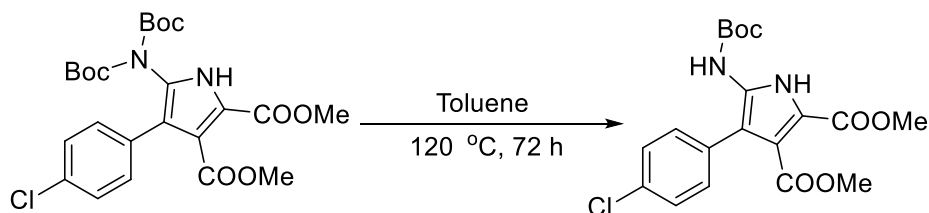

**Dimethyl 5-((tert-butoxycarbonyl)amino)-4-(4-chlorophenyl)-1H-pyrrole-2,3-dicarboxylate (12):** In a 15 mL oven-dried resealable screw-cap test tube, **11** (10.2 mg, 0.02 mmol) and toluene (0.5 mL) were mixed. The reaction was stirred at 120 °C for 72 h. After the

reaction mixture was cooled to room temperature, the mixture was diluted with ethyl acetate (15 mL) and 4-nitroacetophenone (3.3 mg, 0.02 mmol) was added. Crude  $^1\text{H}$  NMR analysis indicated the formation of **9** in 74% yield.

## VII. References

- [1] Lei, J.; Sha, W.; Xie, X.; Weng, W.-T. *Org. Lett.* **2023**, *25*, 320.
- [2] Beveridge, E. R.; Batey, R. A. *Org. Lett.* **2012**, *14*, 540.

## VIII. Copies of NMR spectra

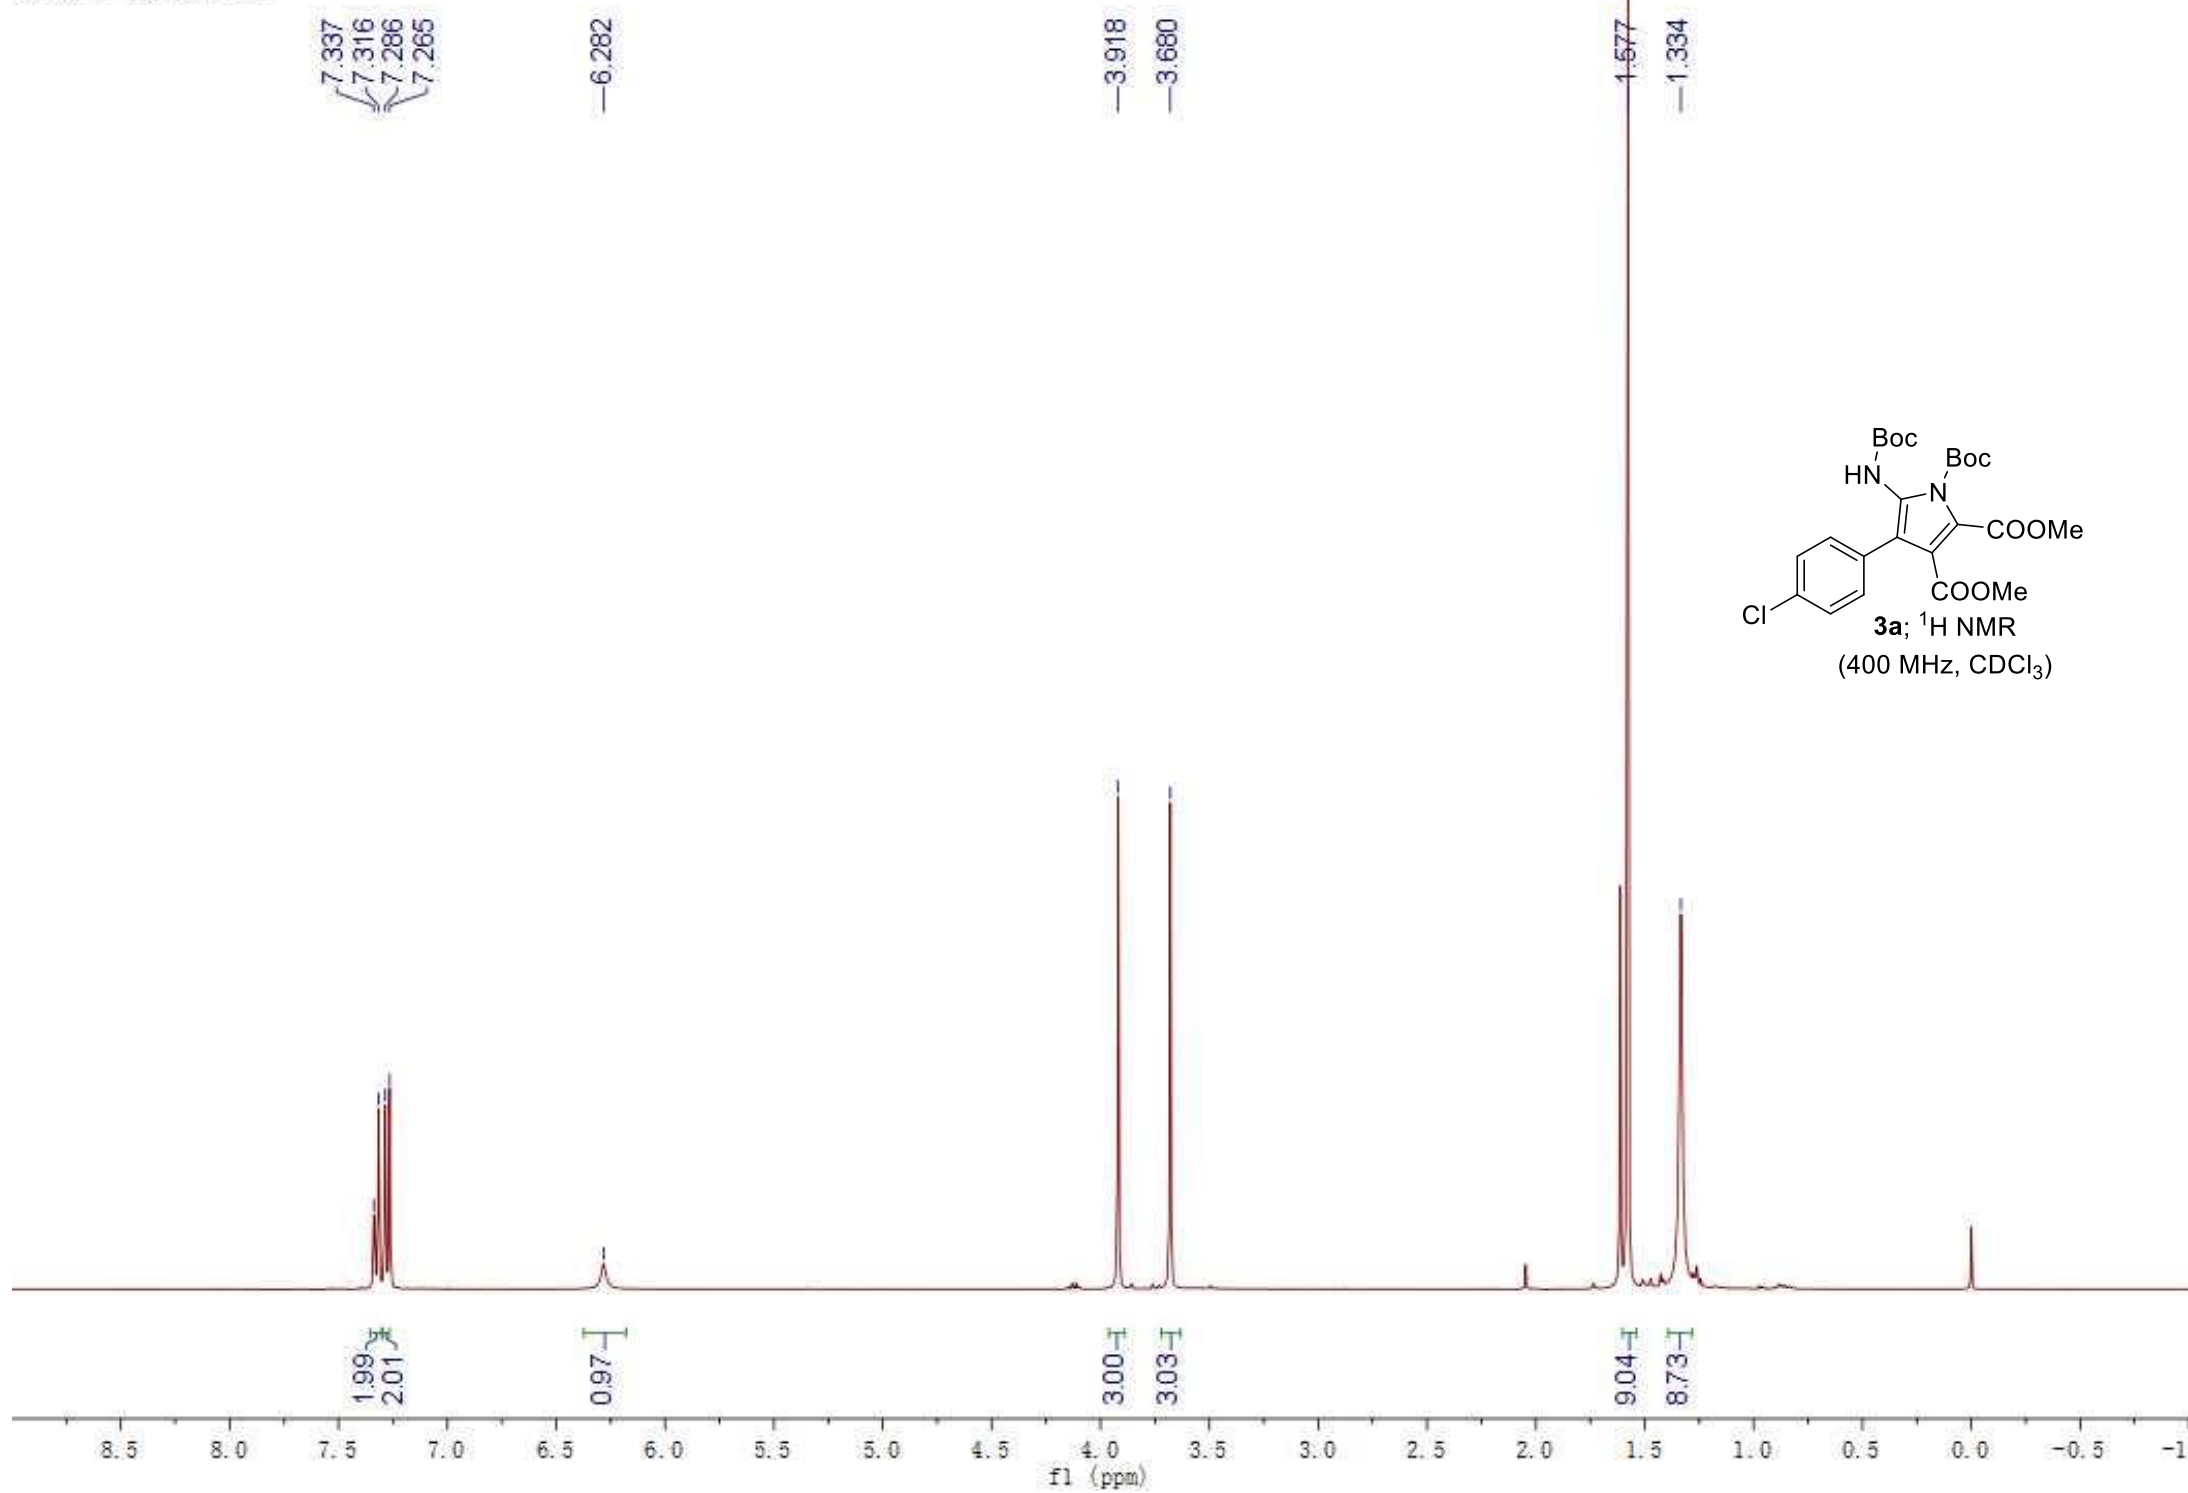

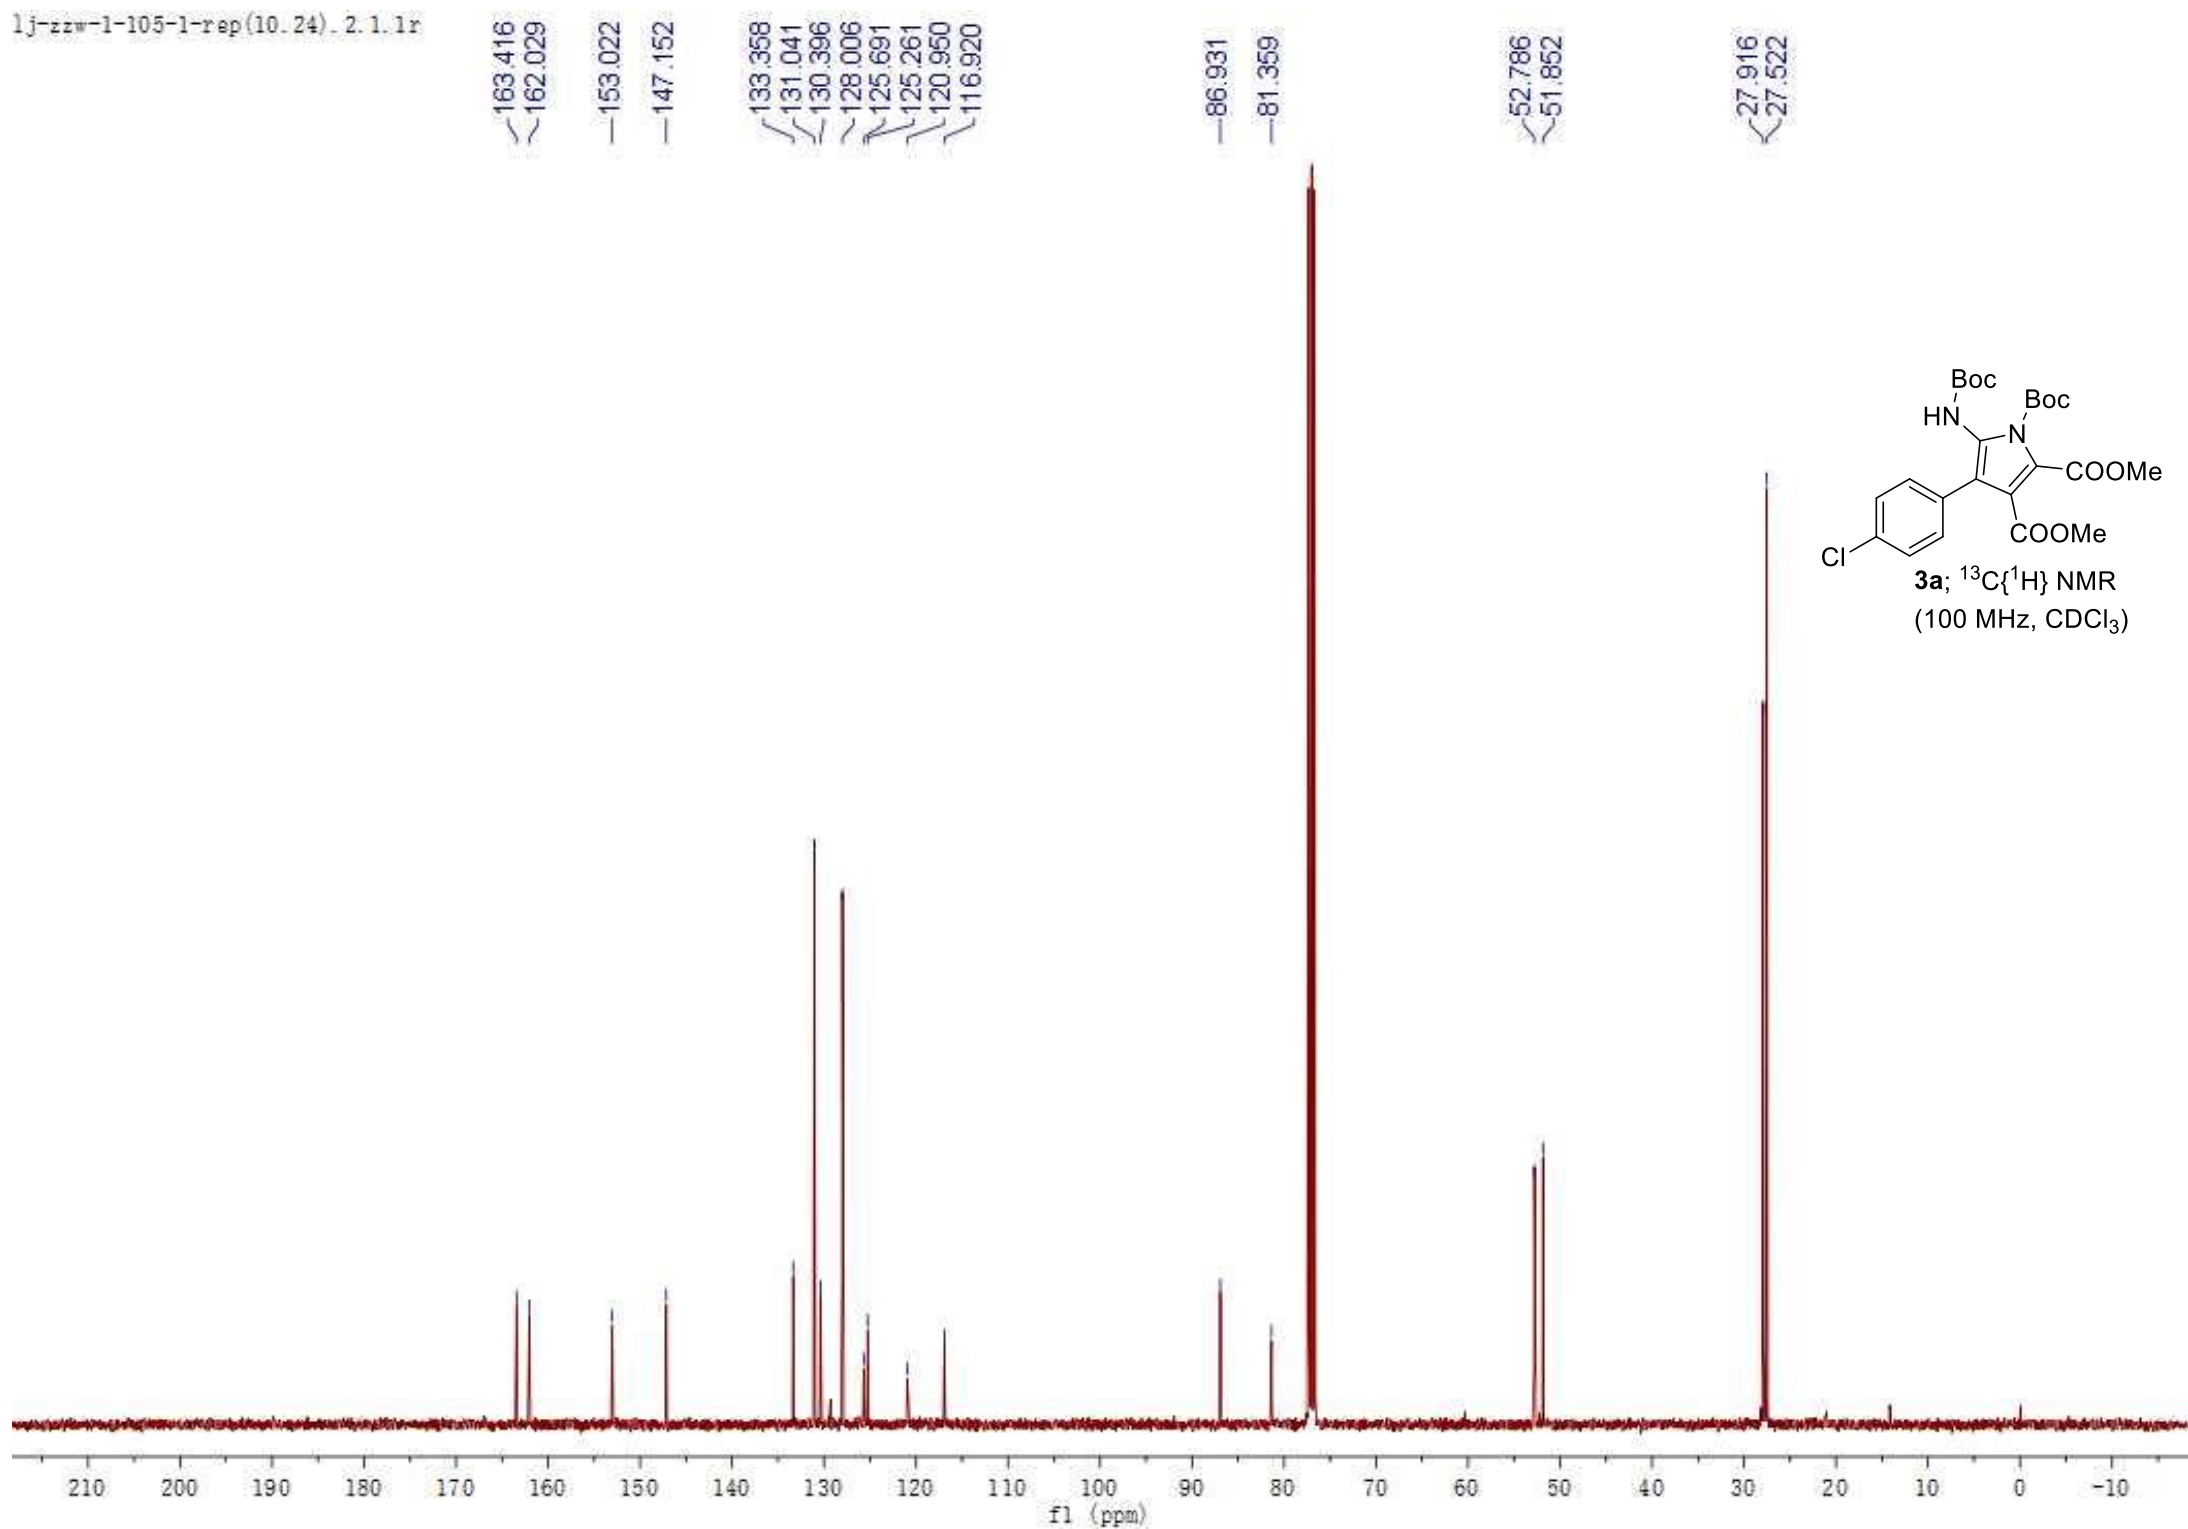

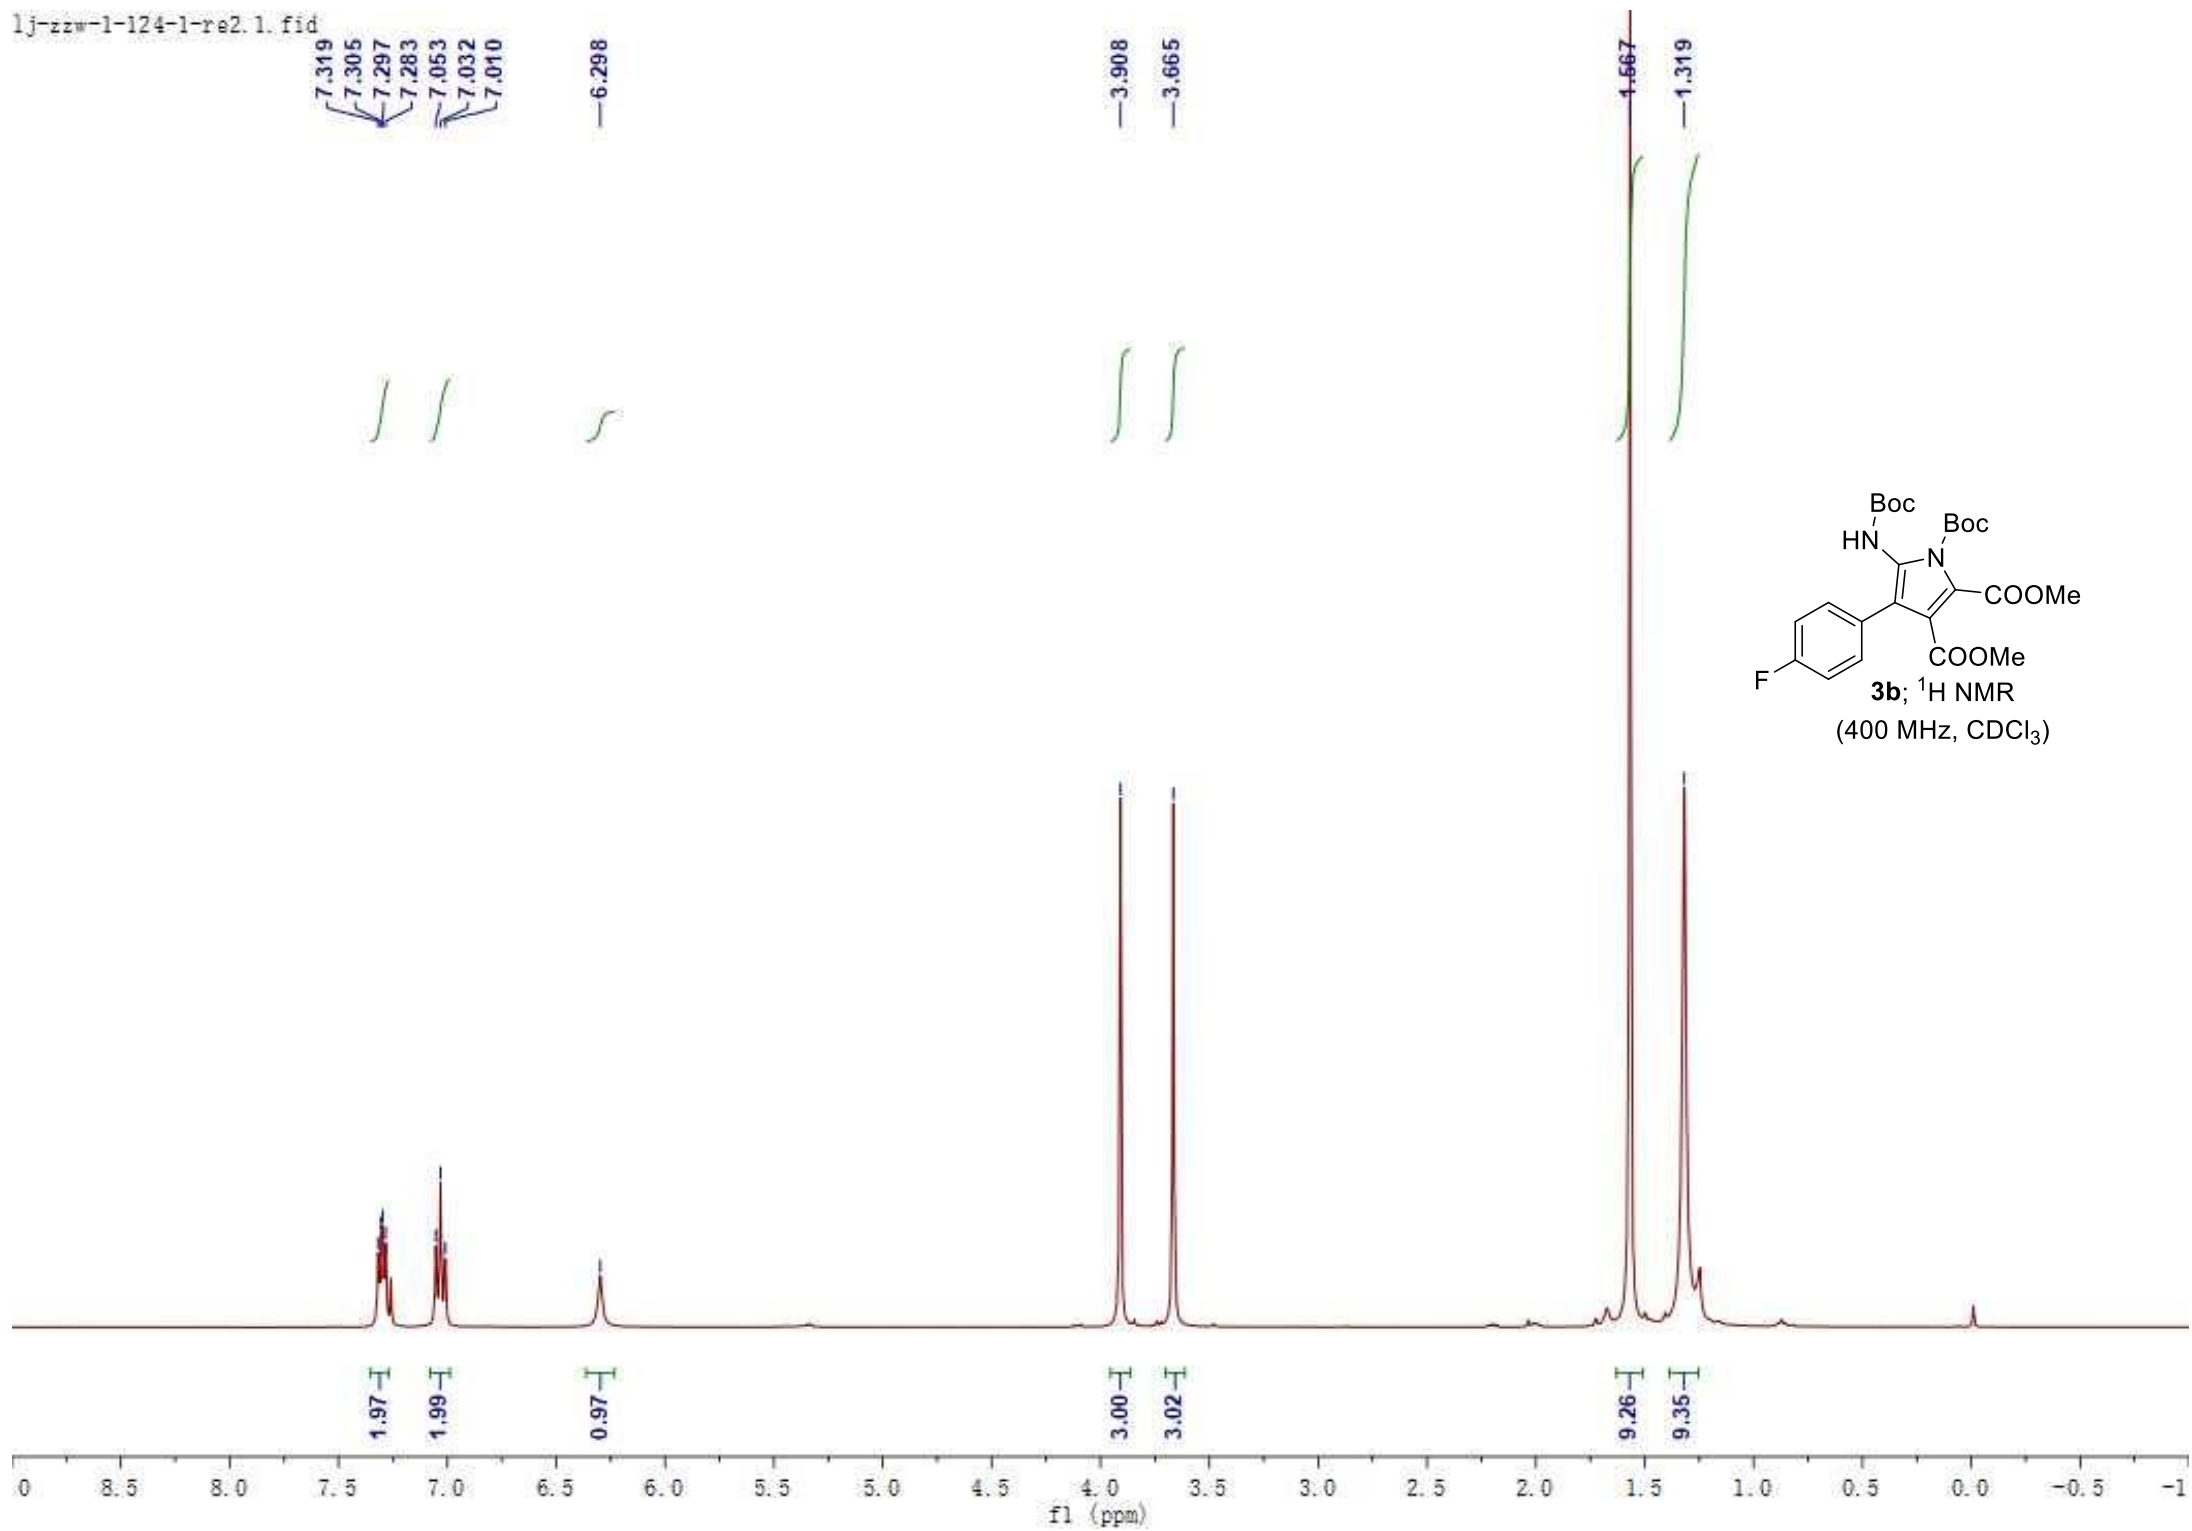

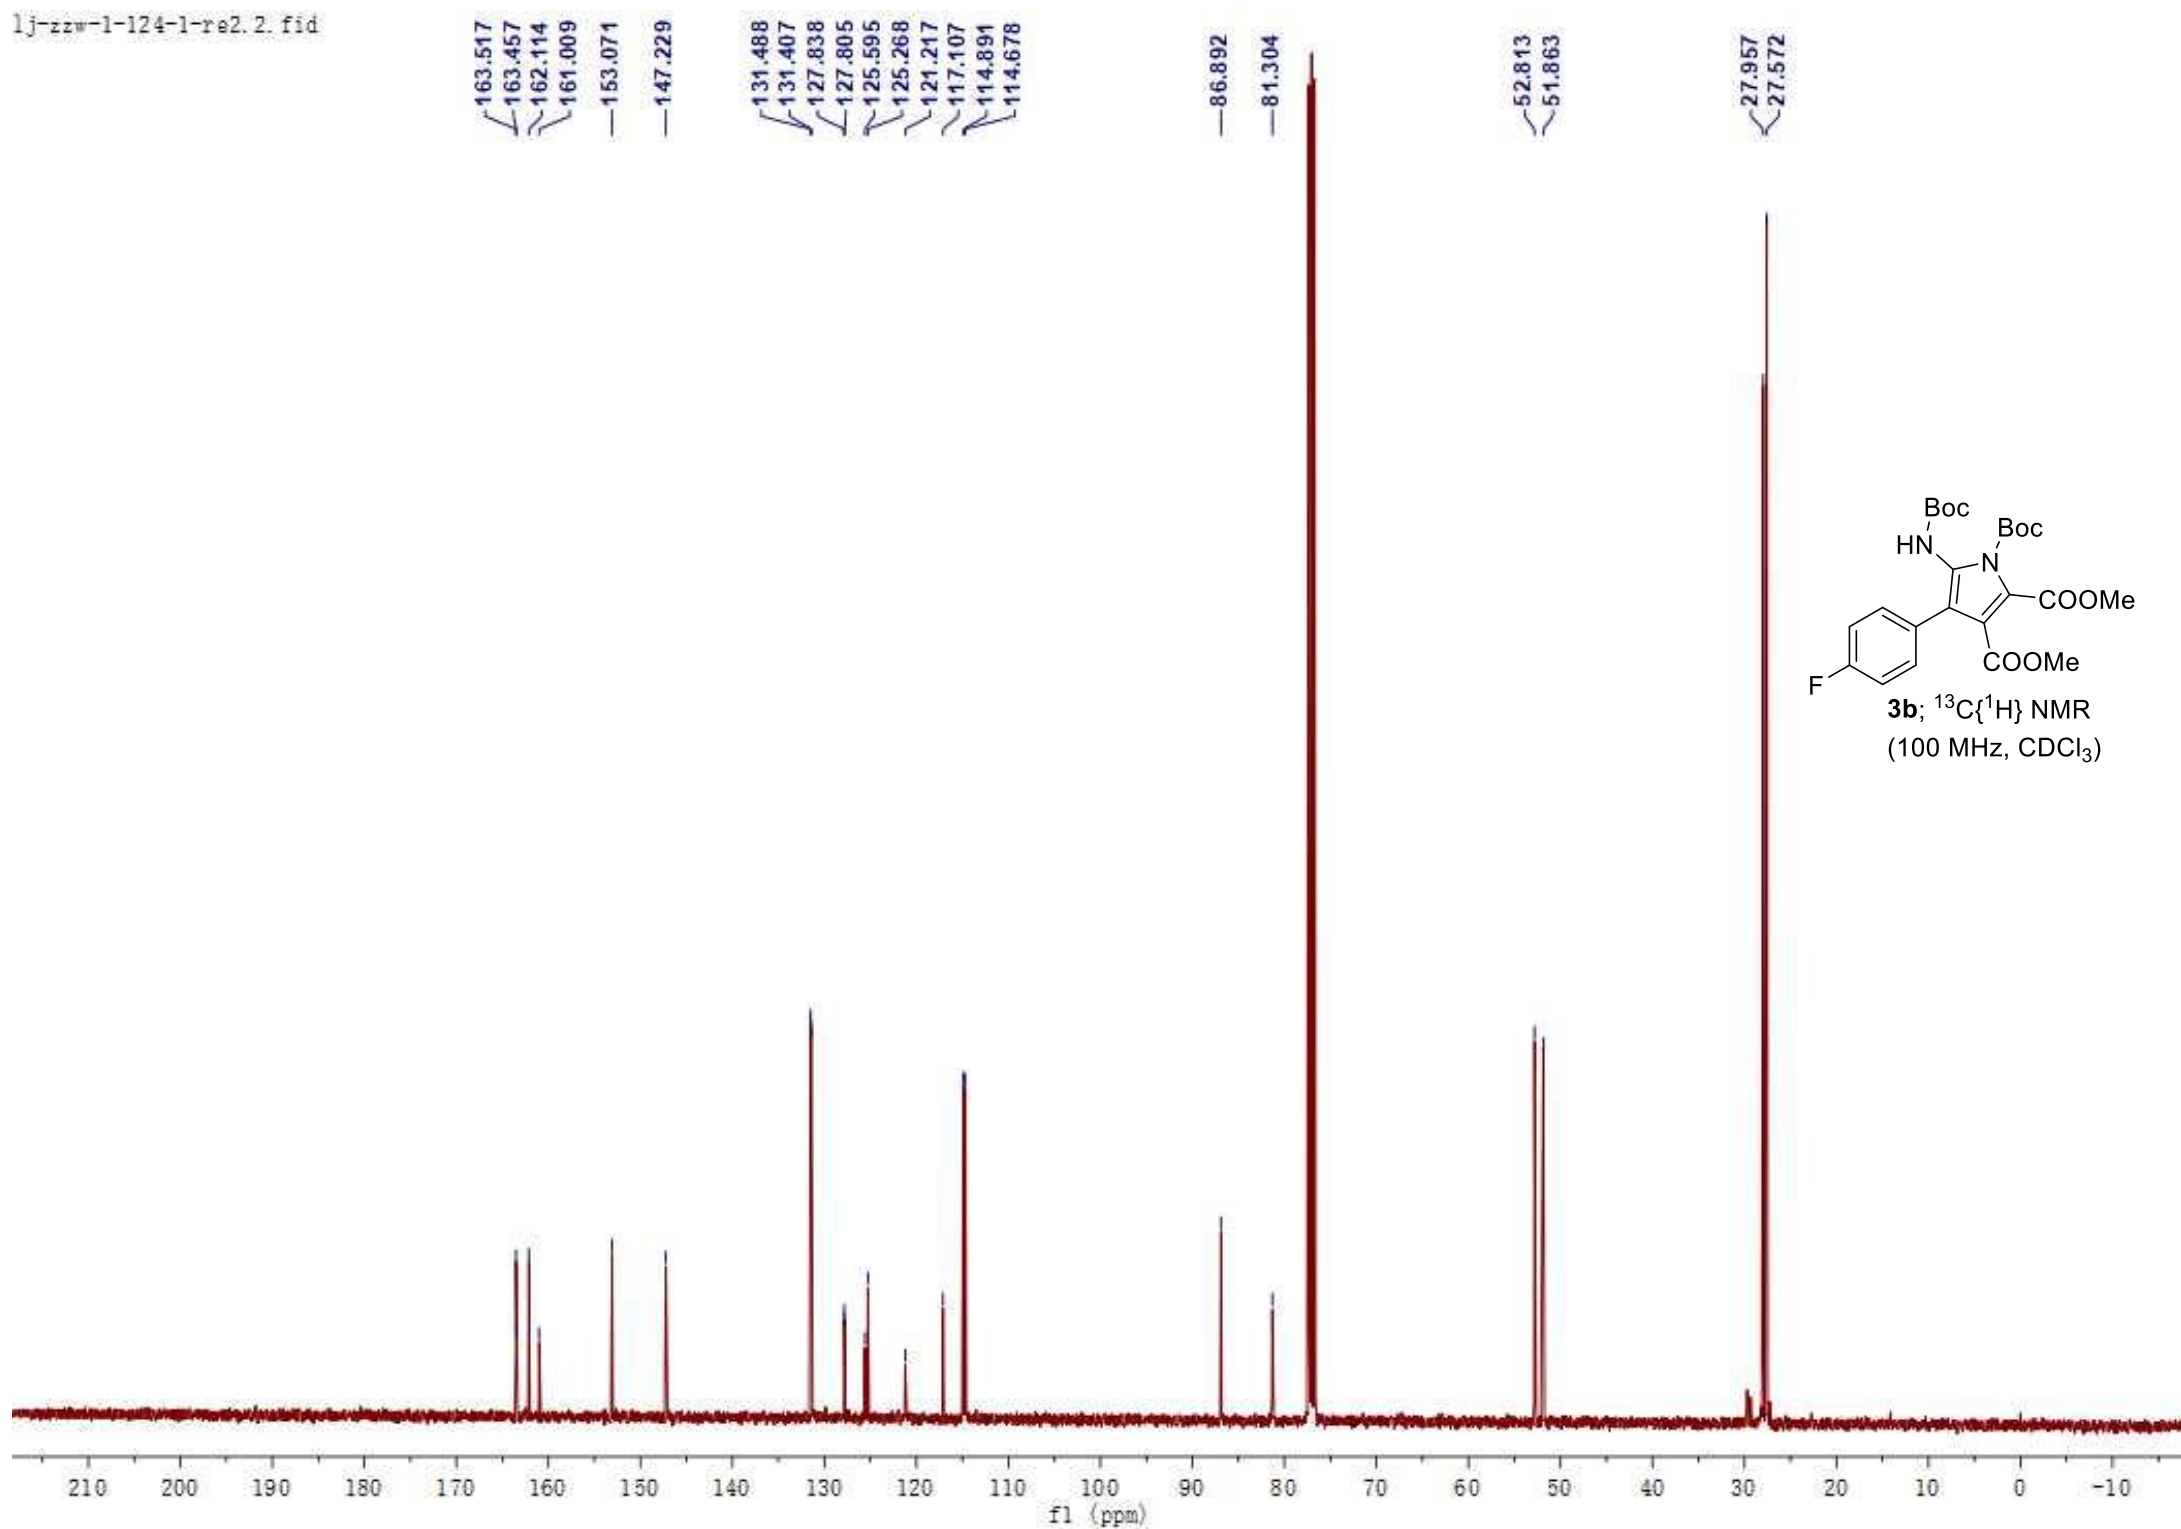



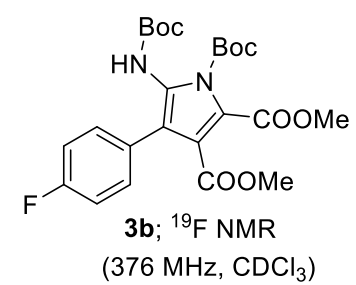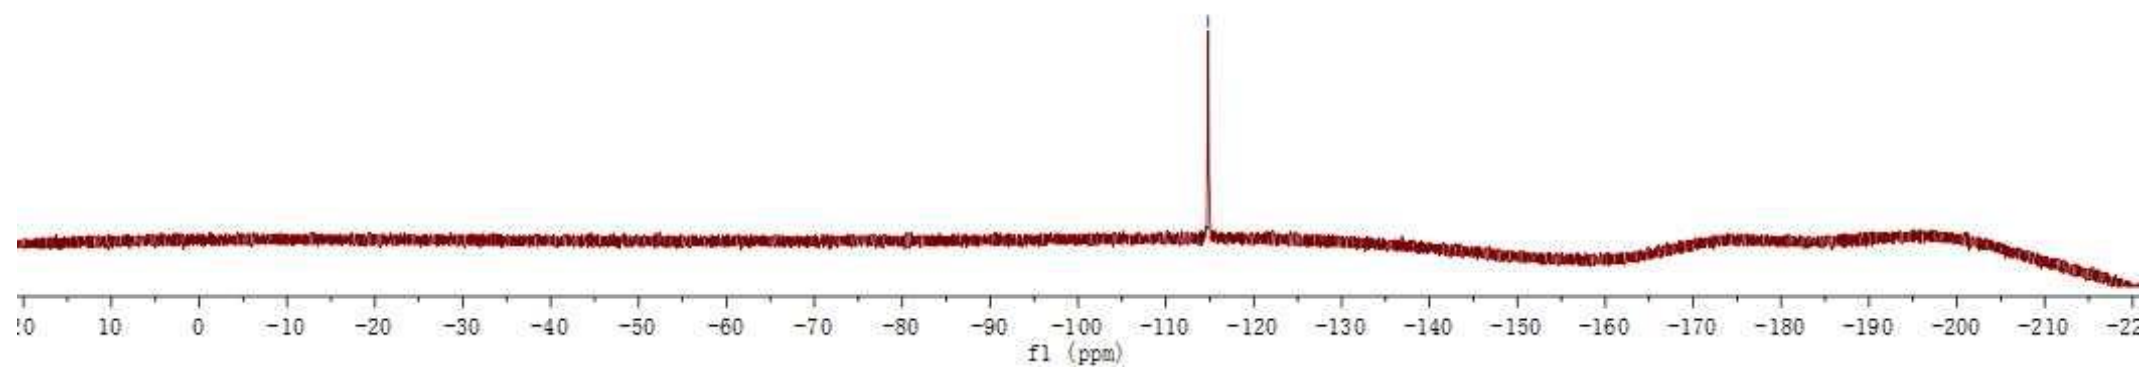

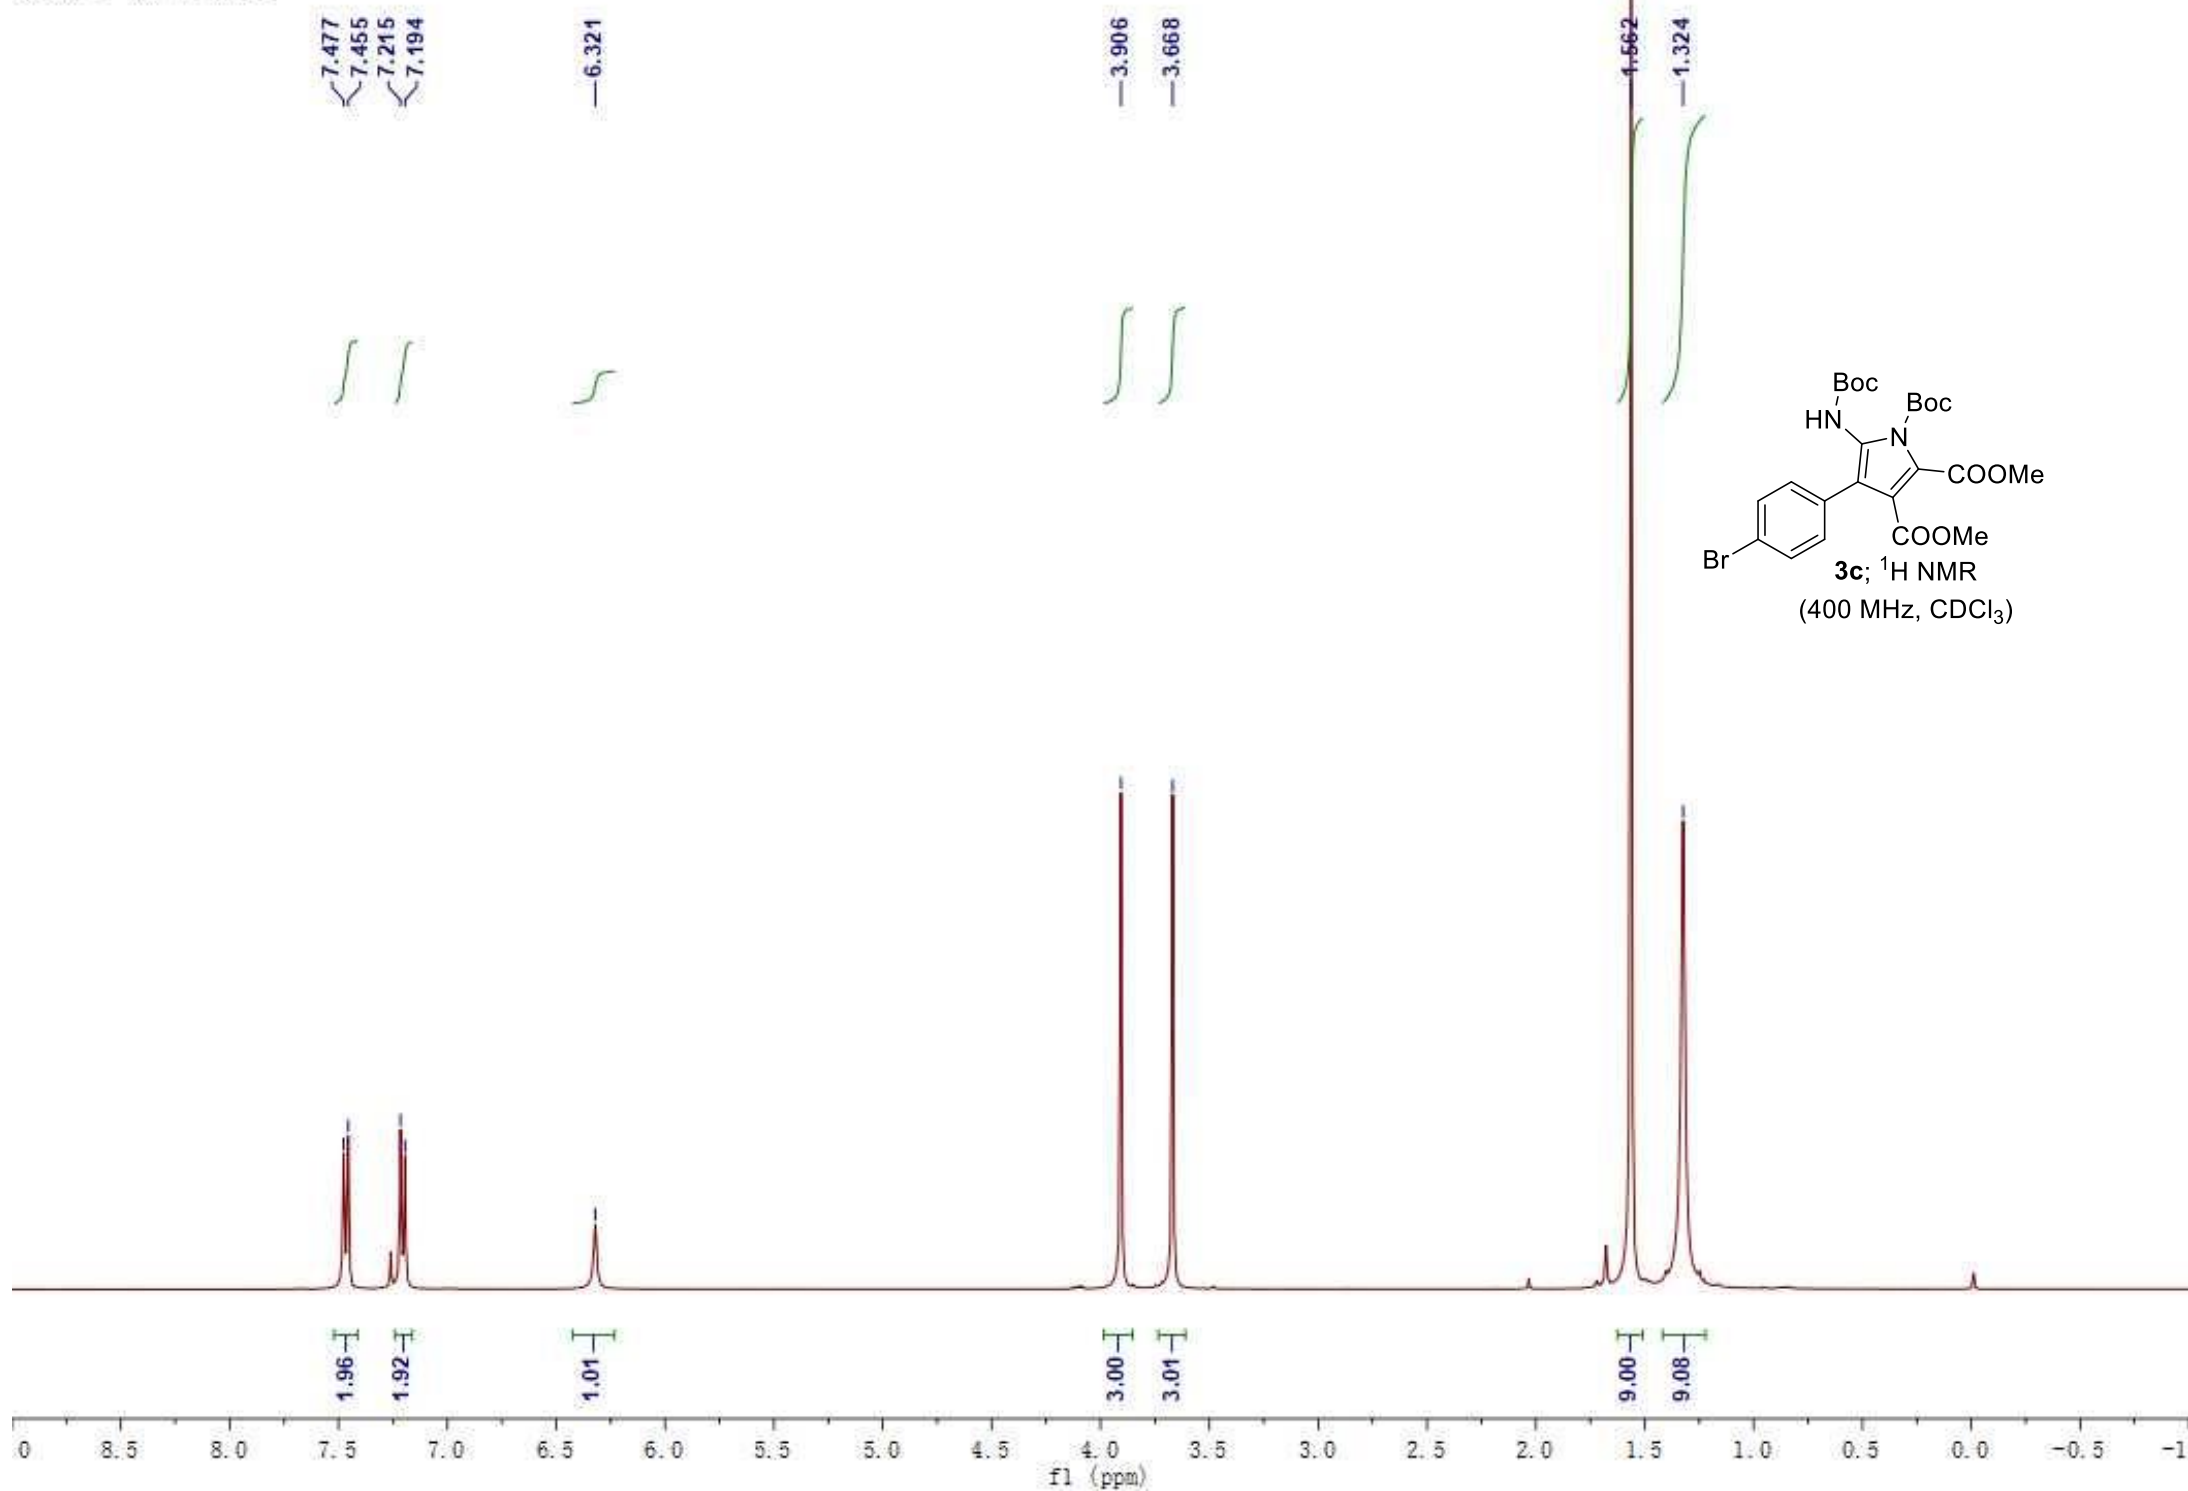

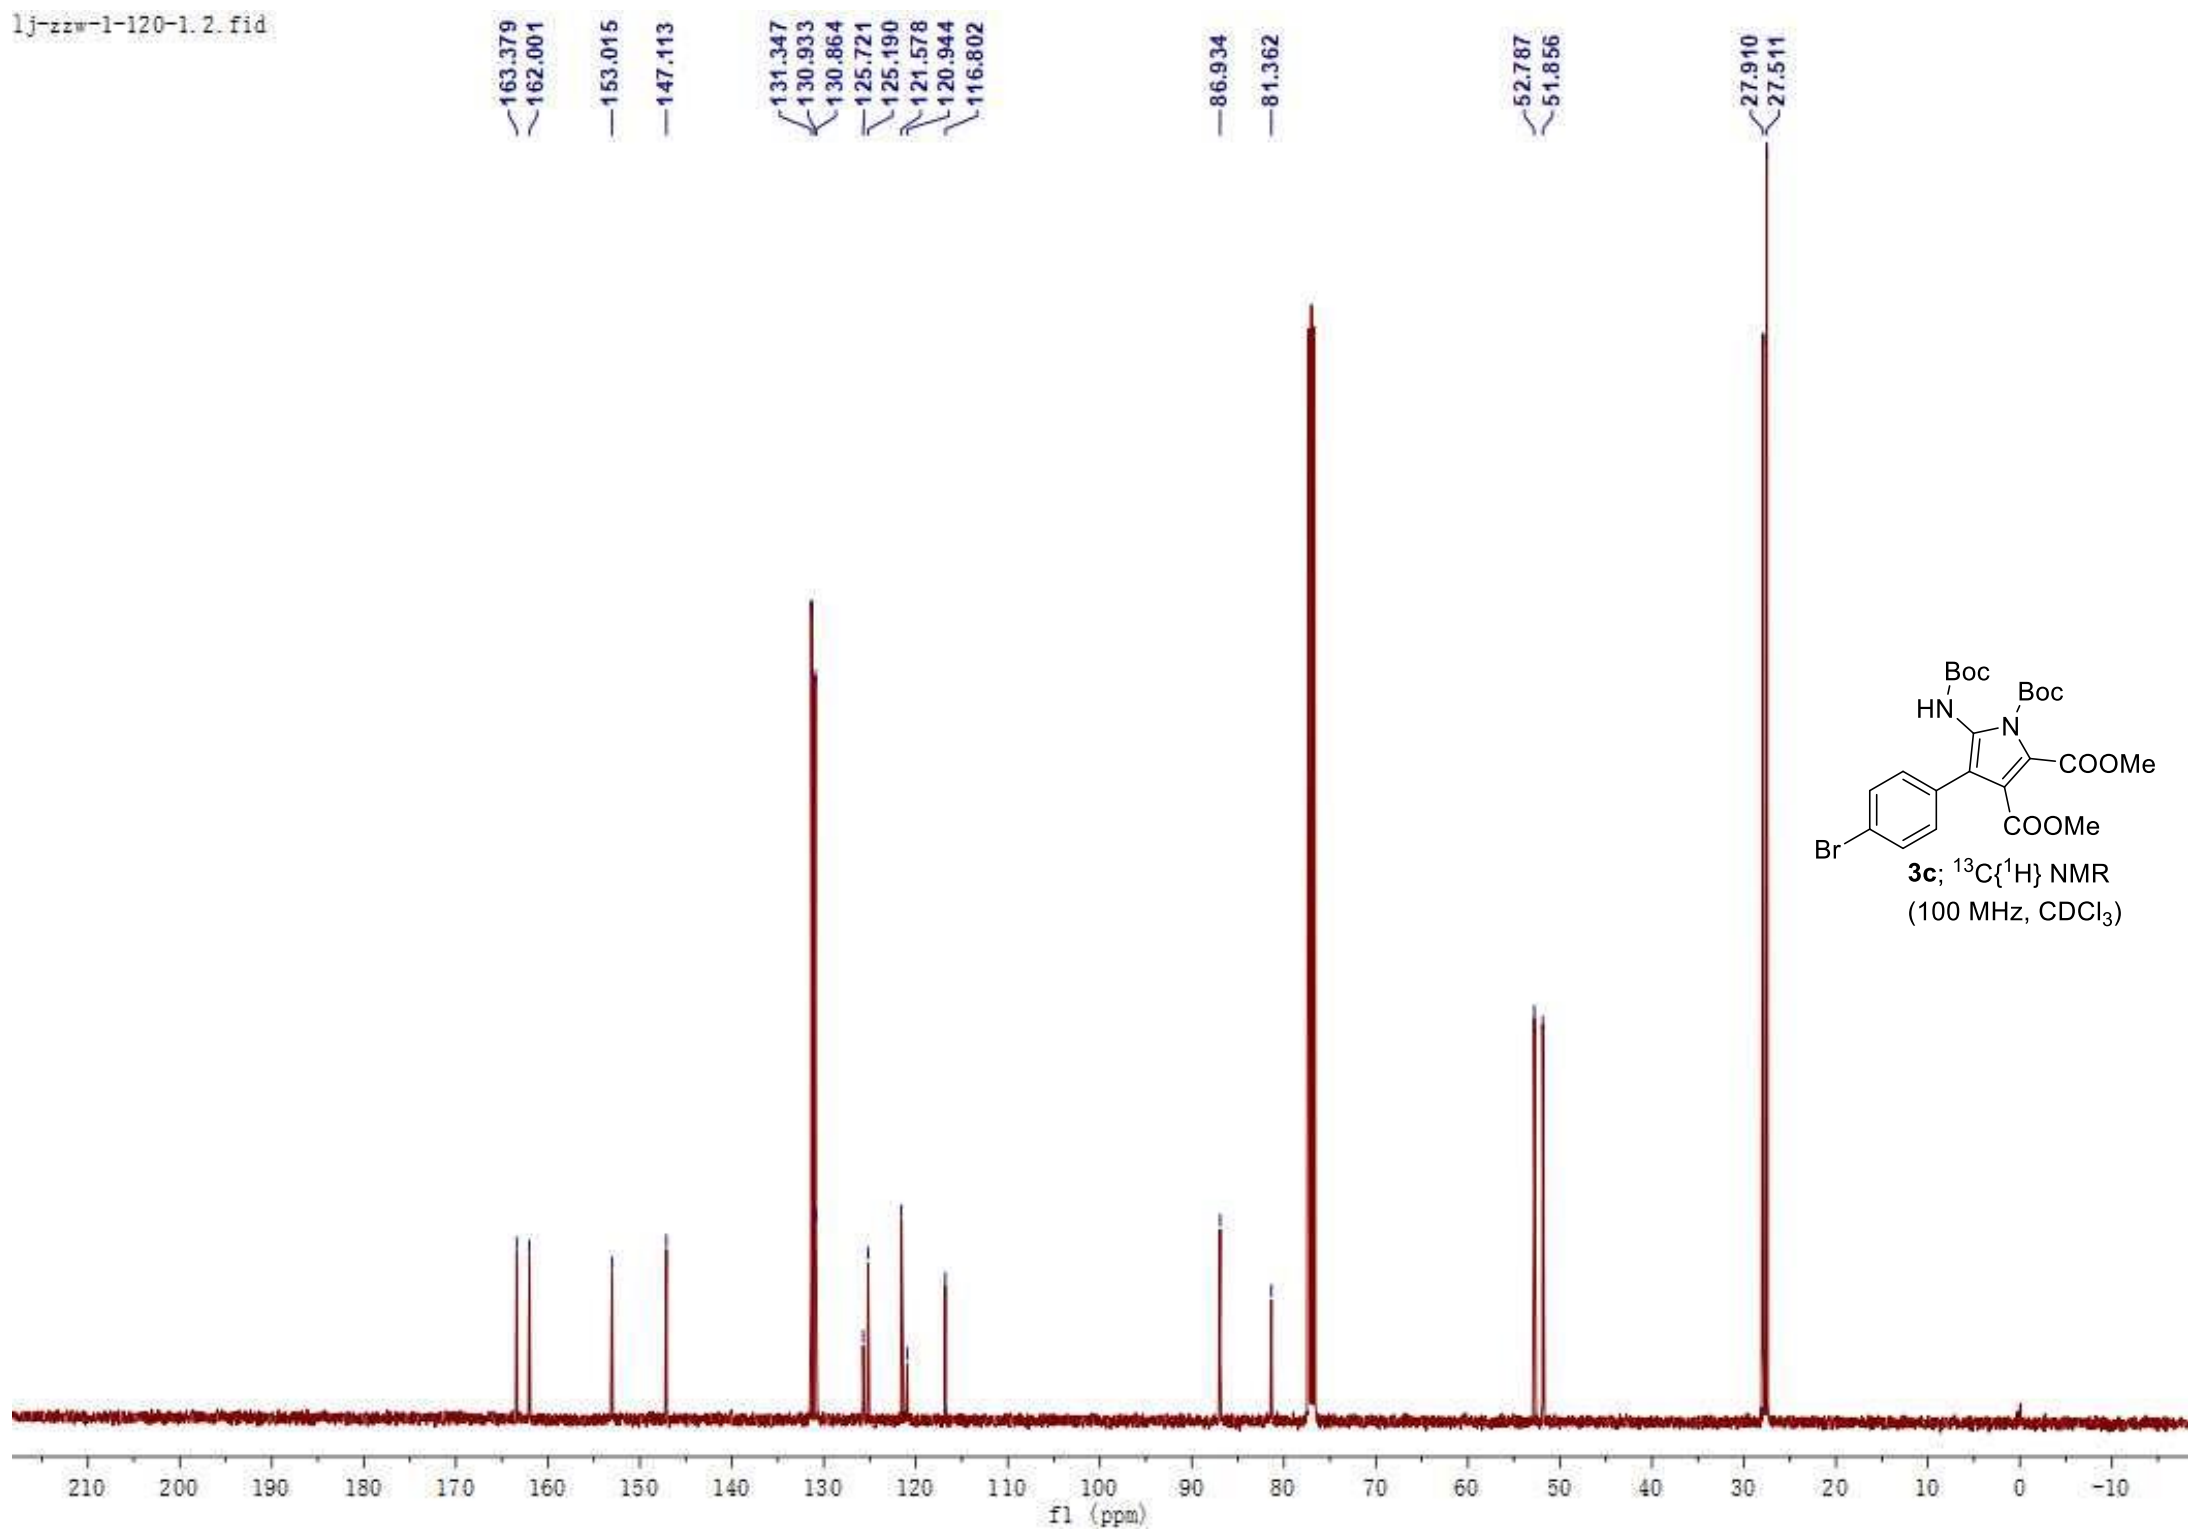

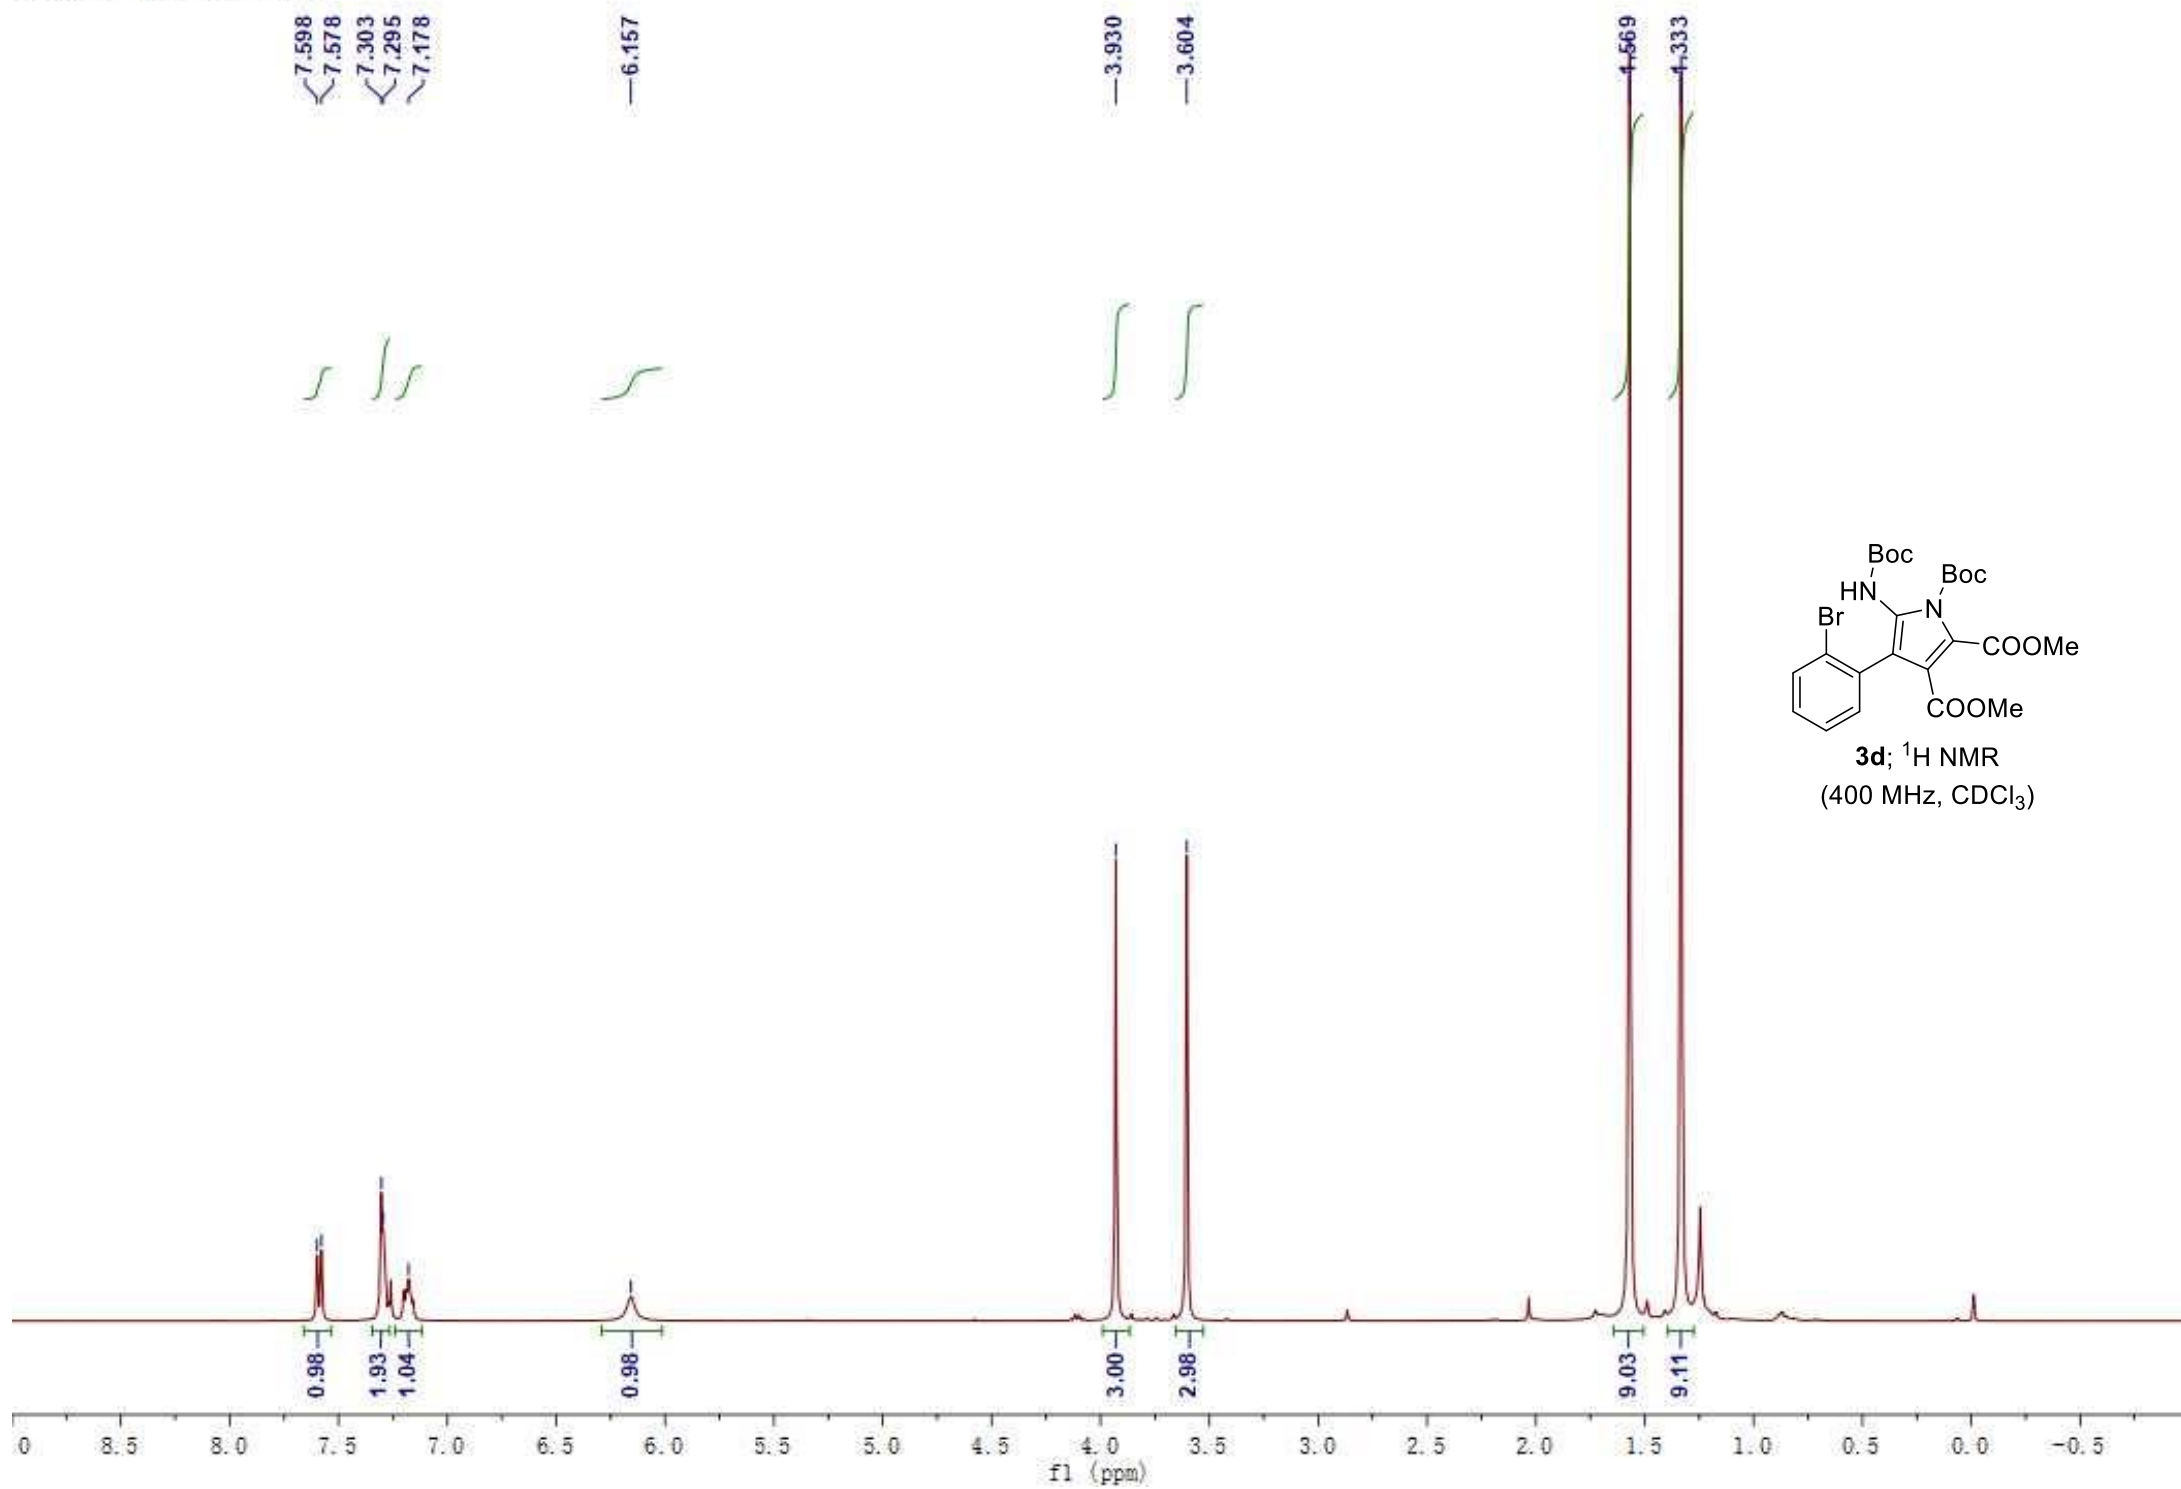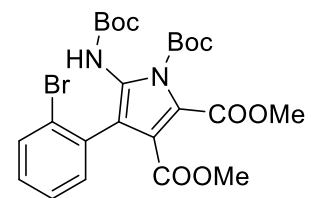

**3d**; <sup>1</sup>H NMR  
(400 MHz, CDCl<sub>3</sub>)

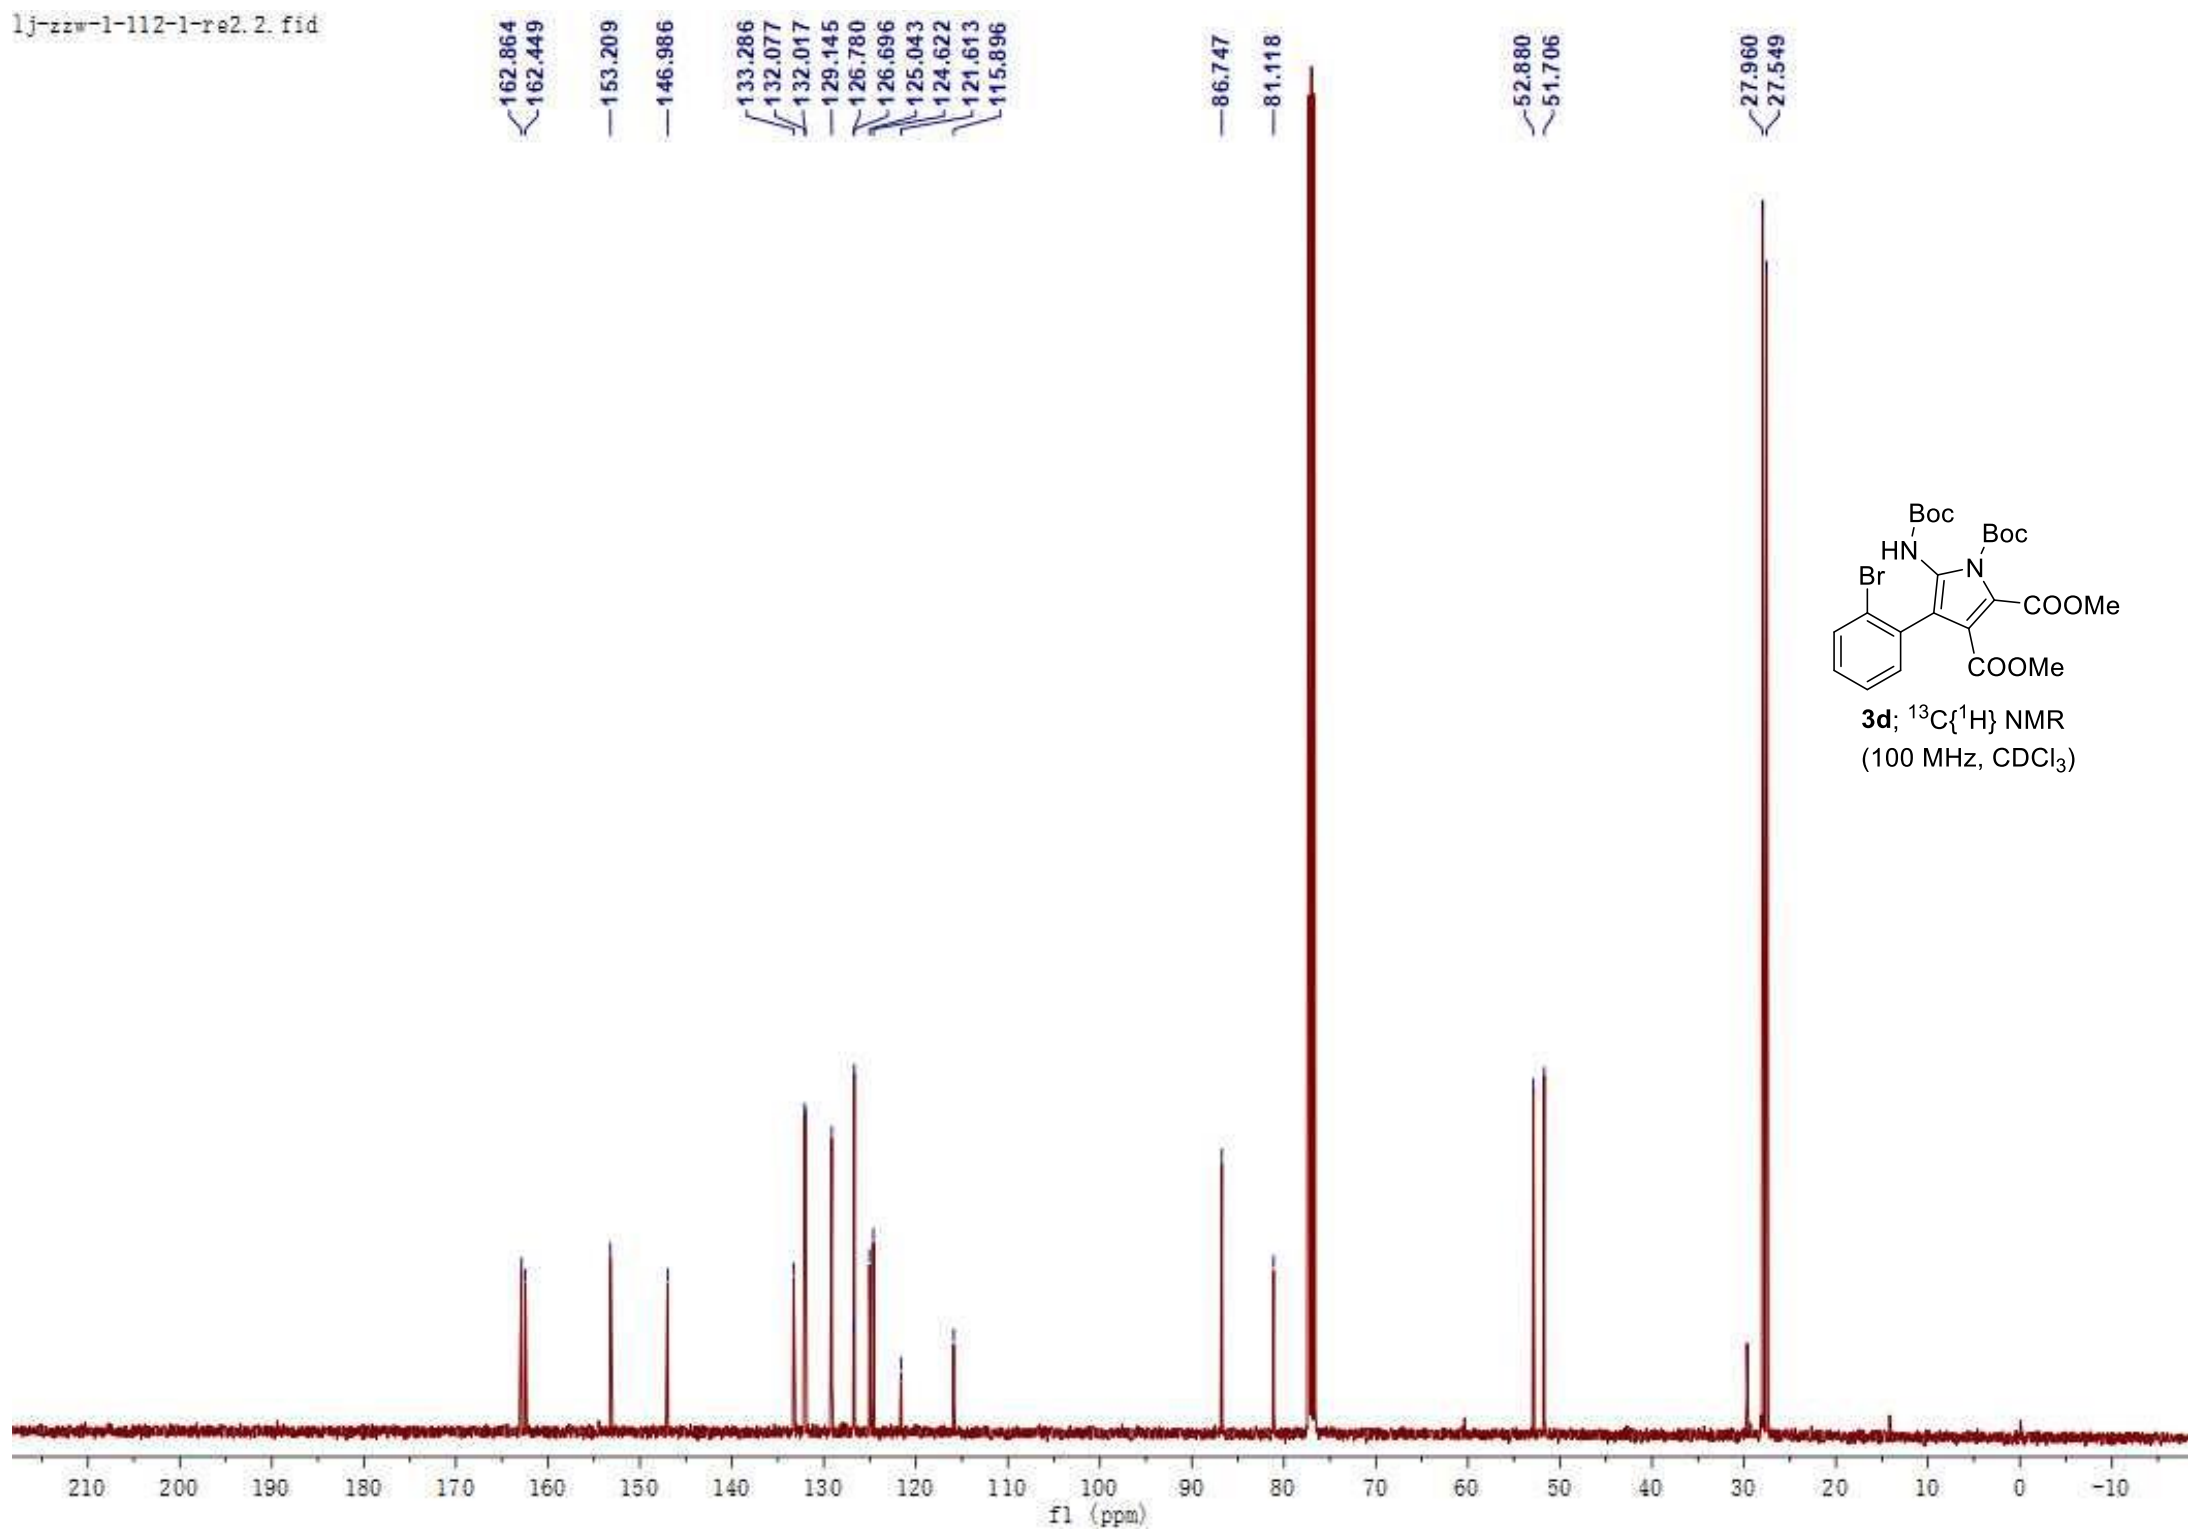

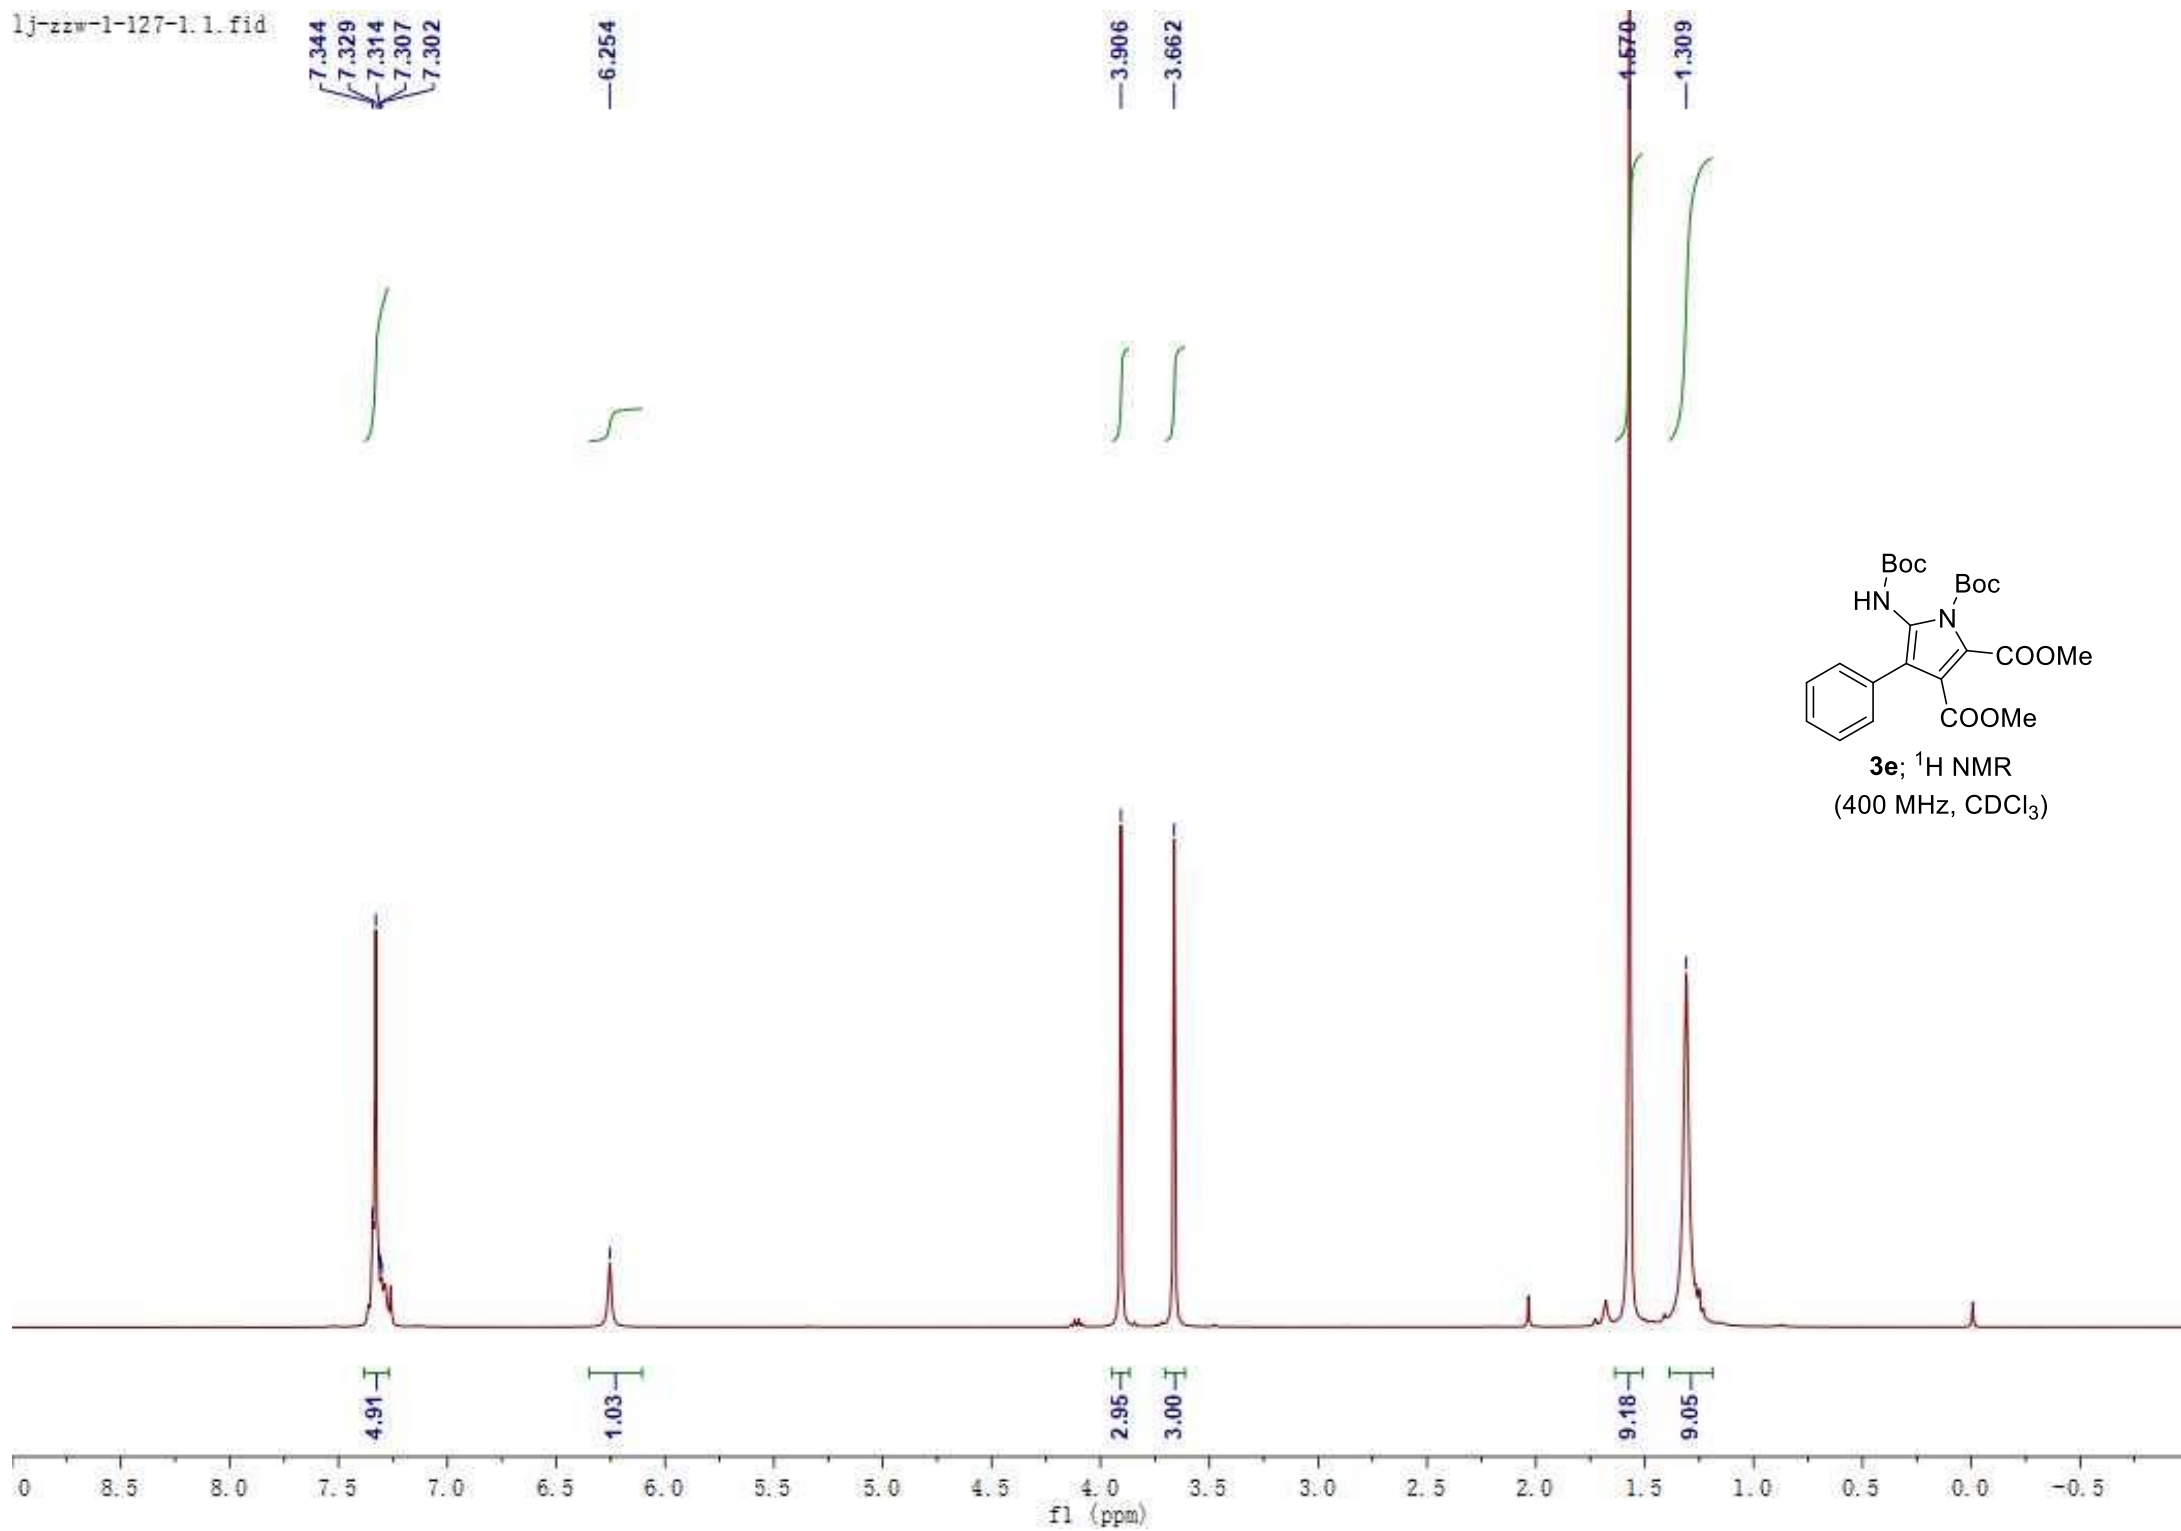

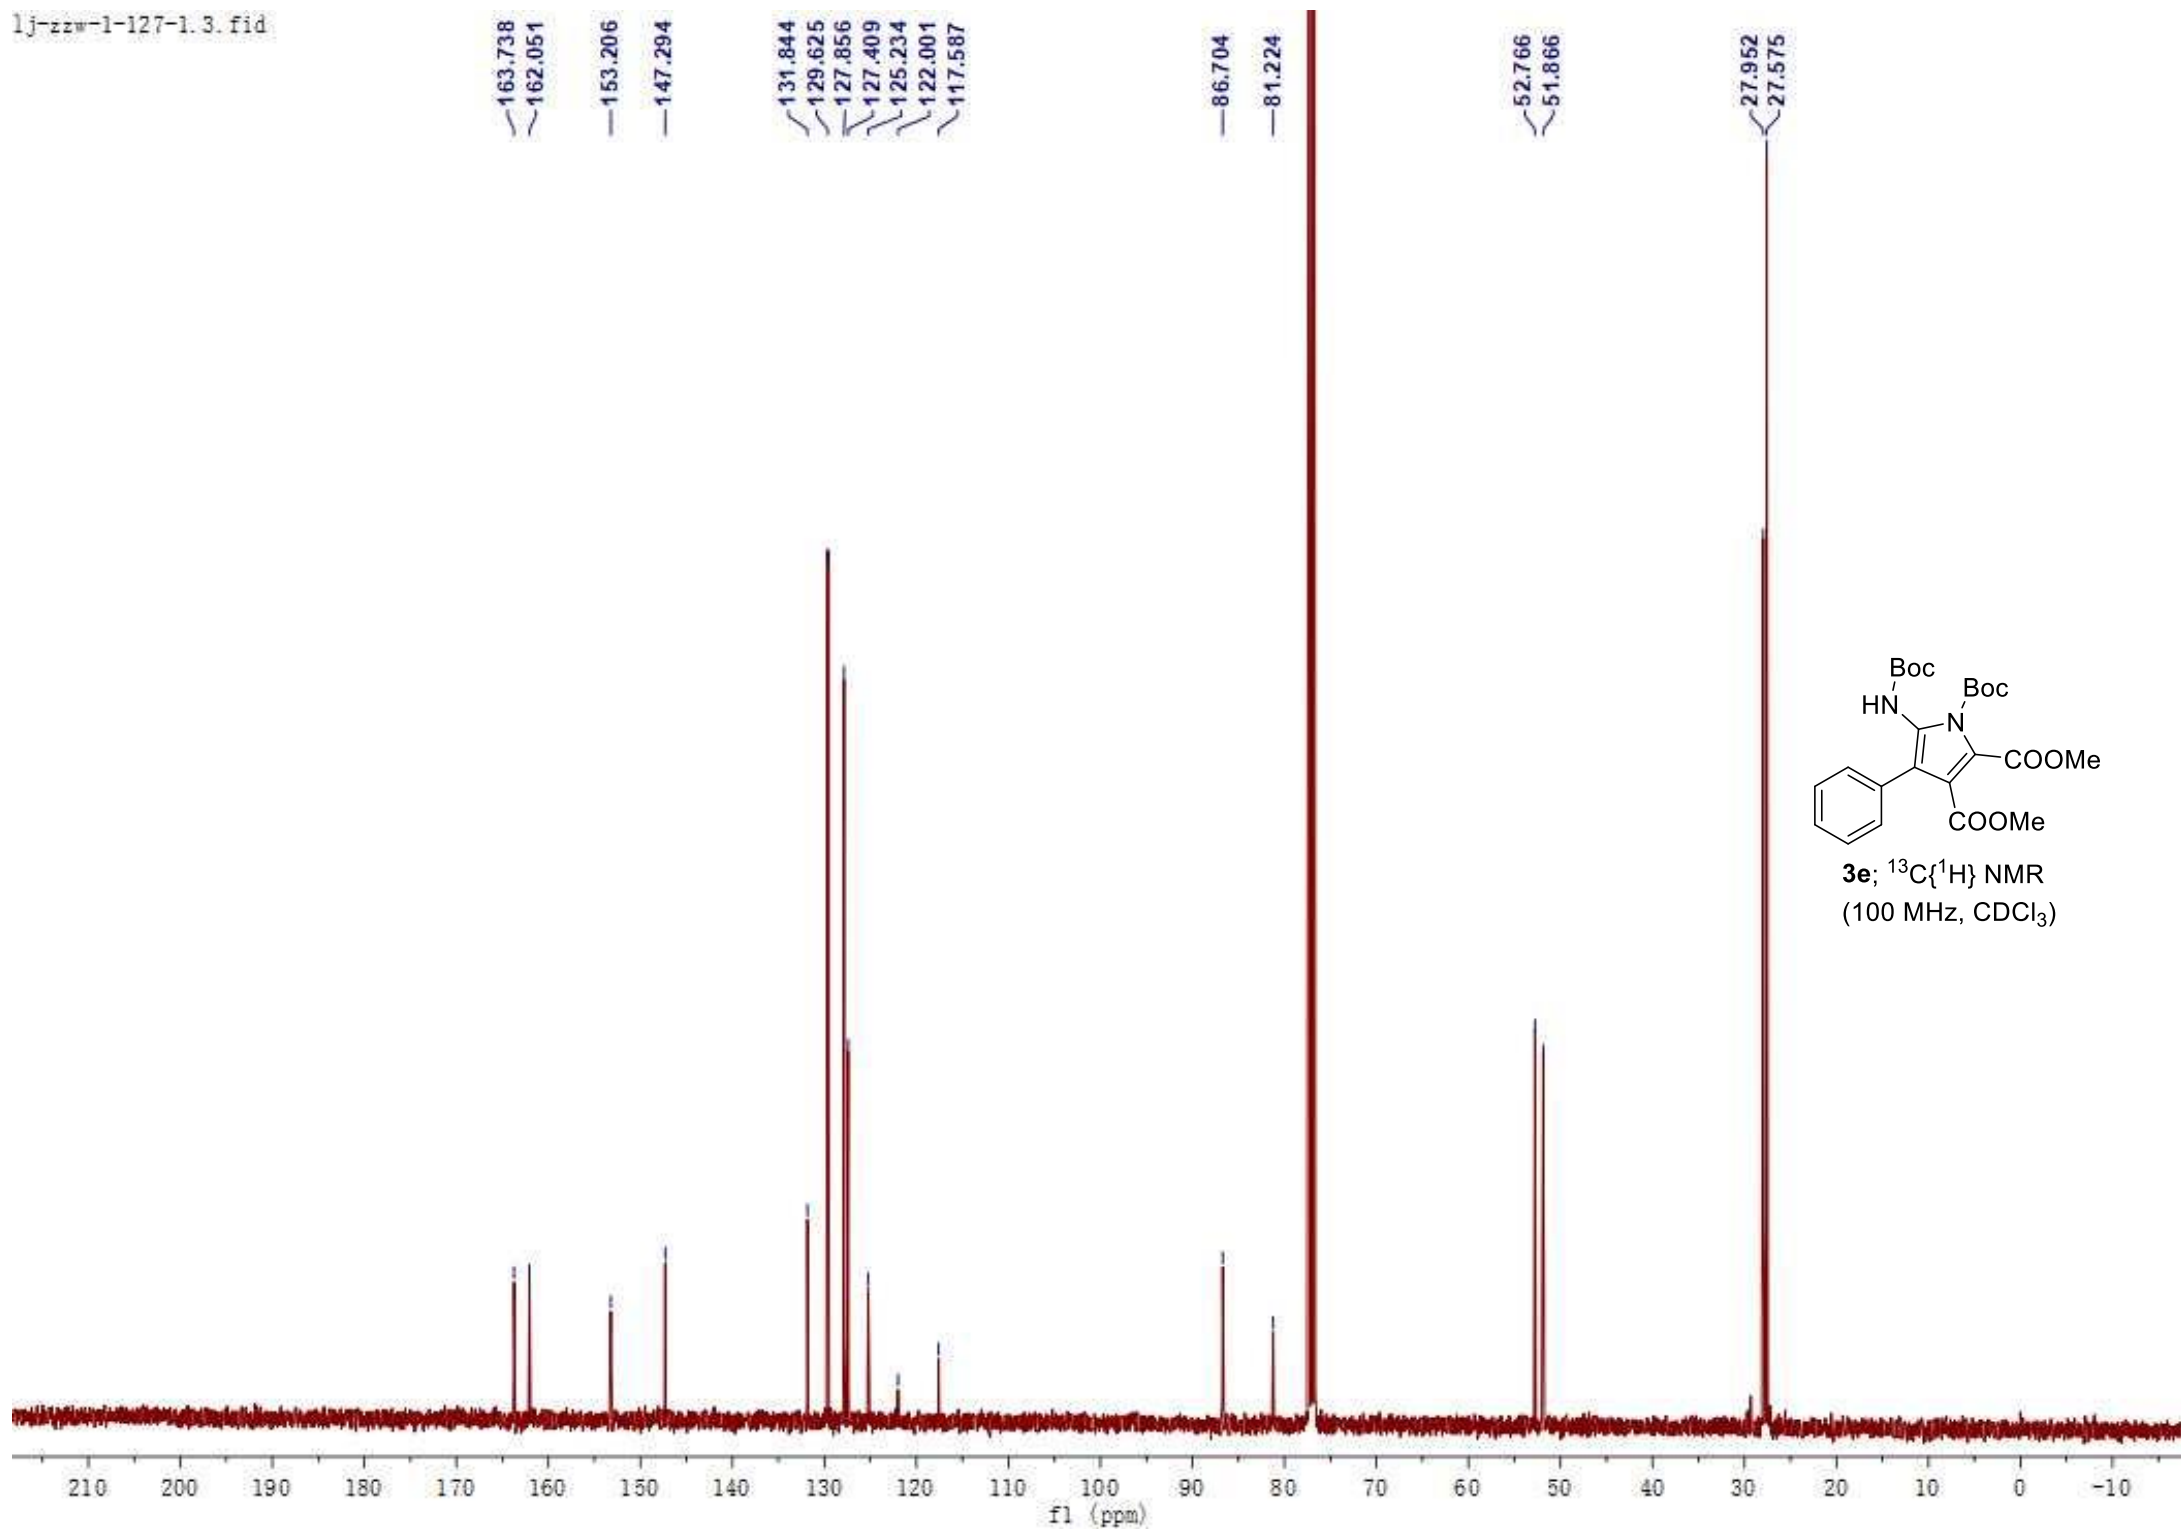

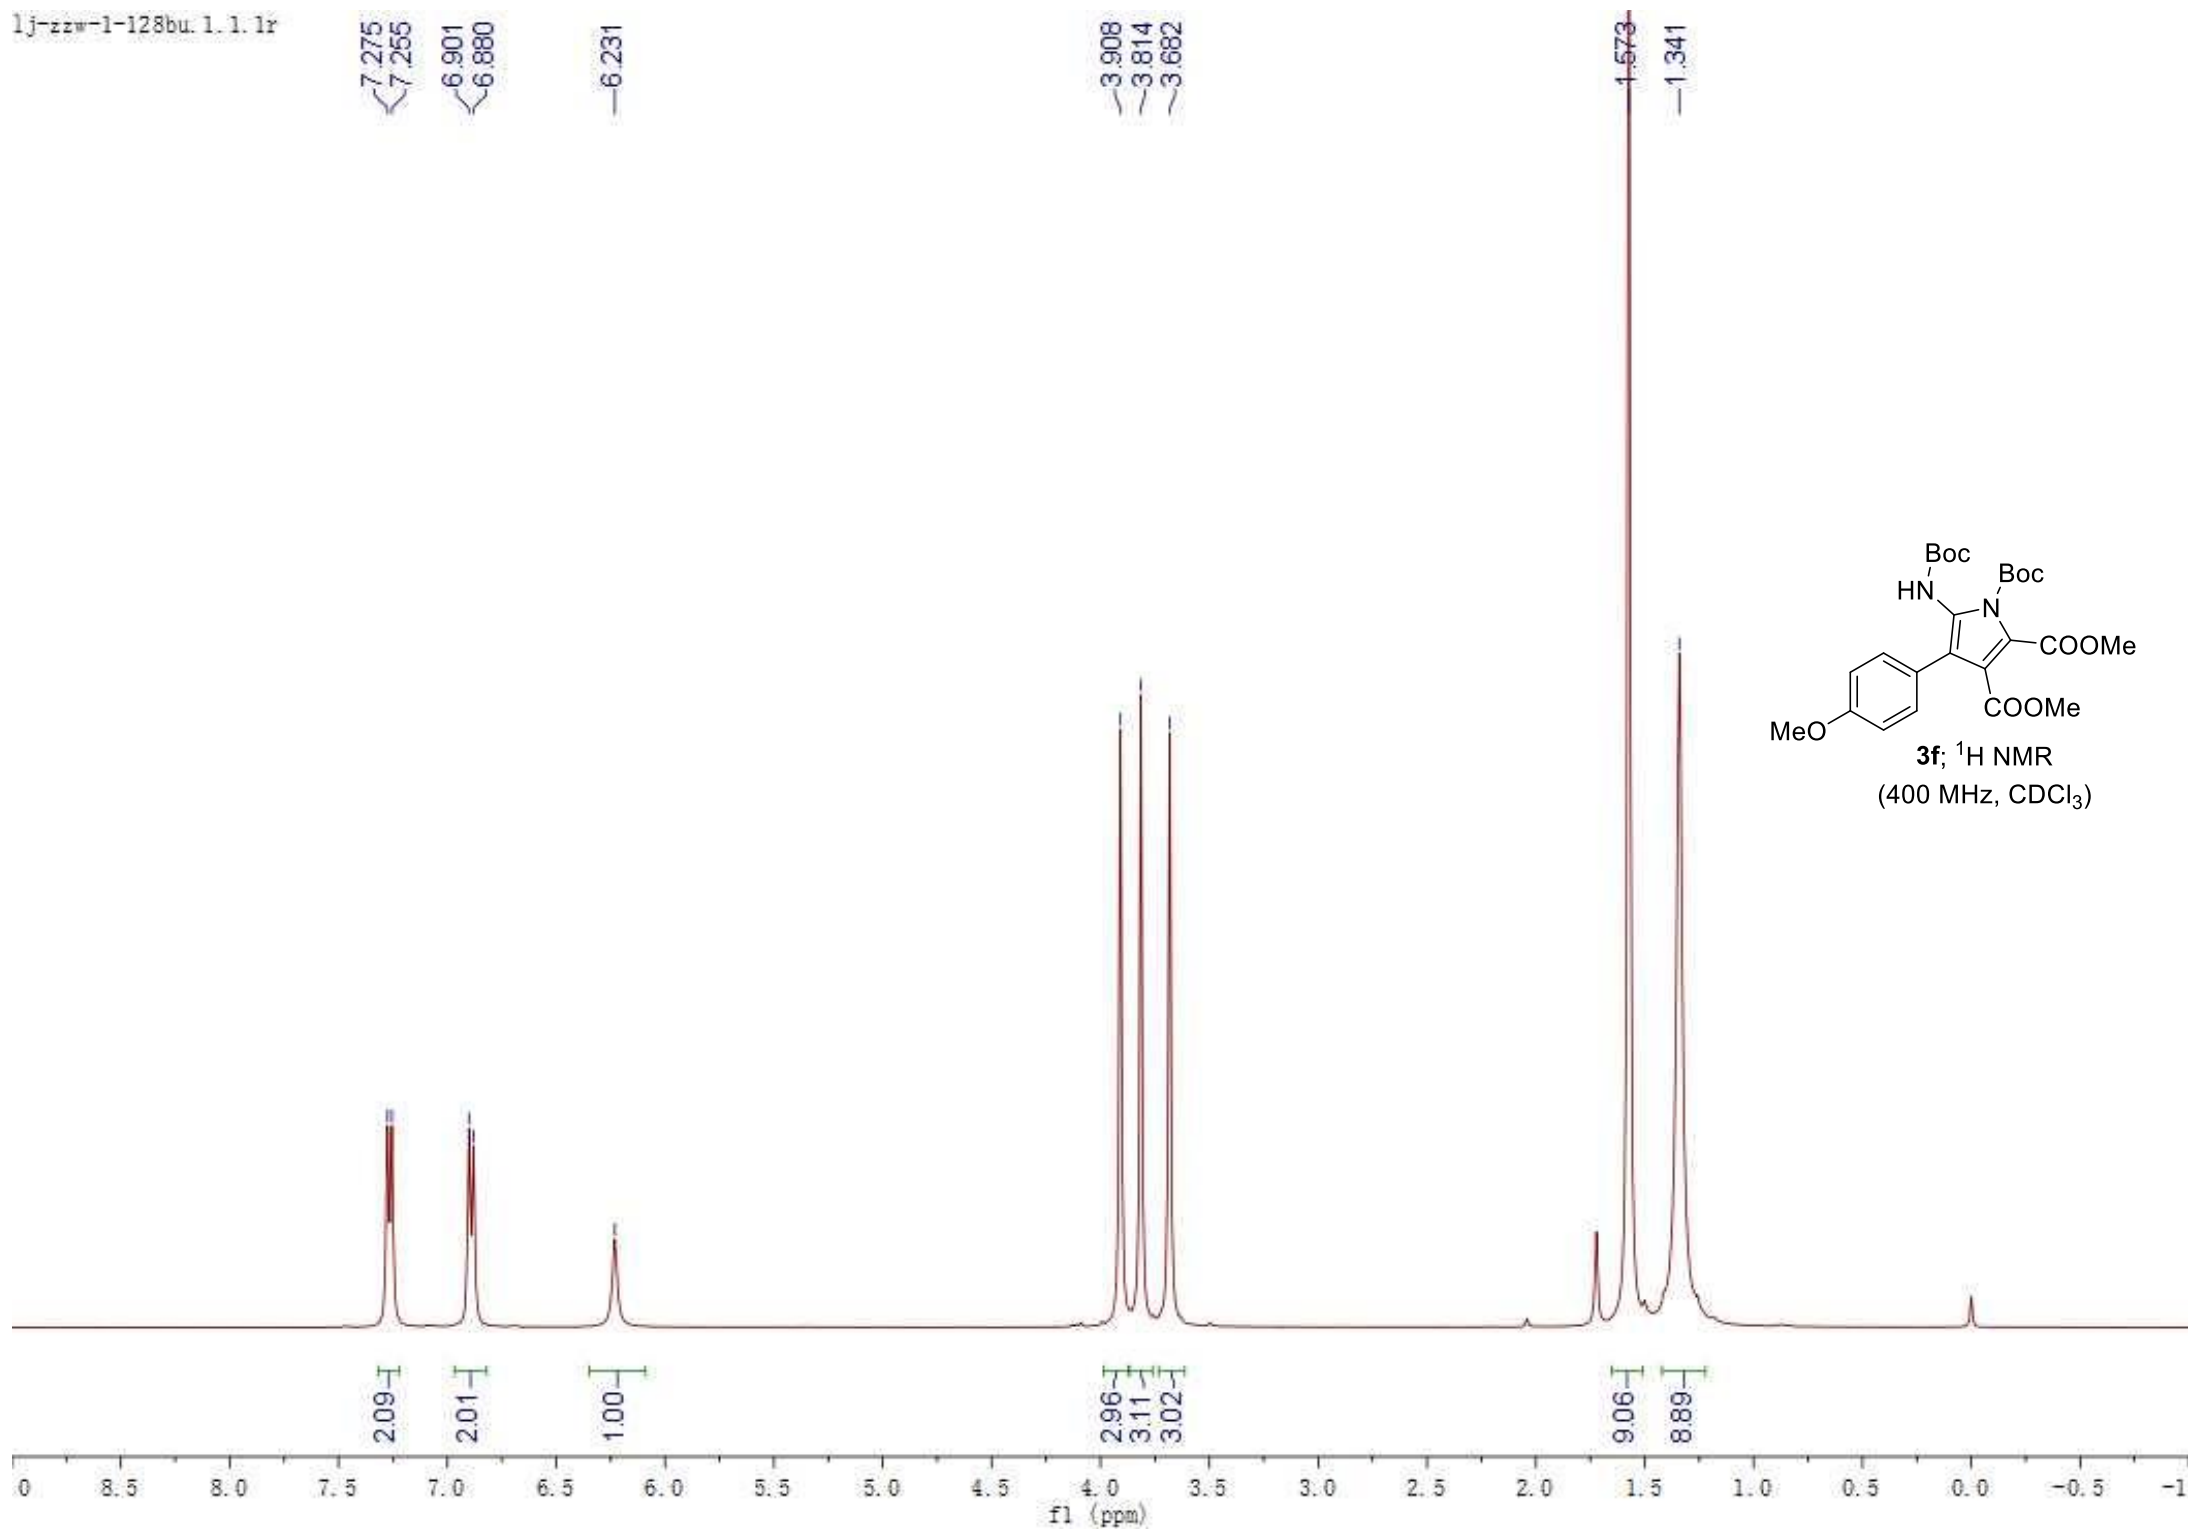



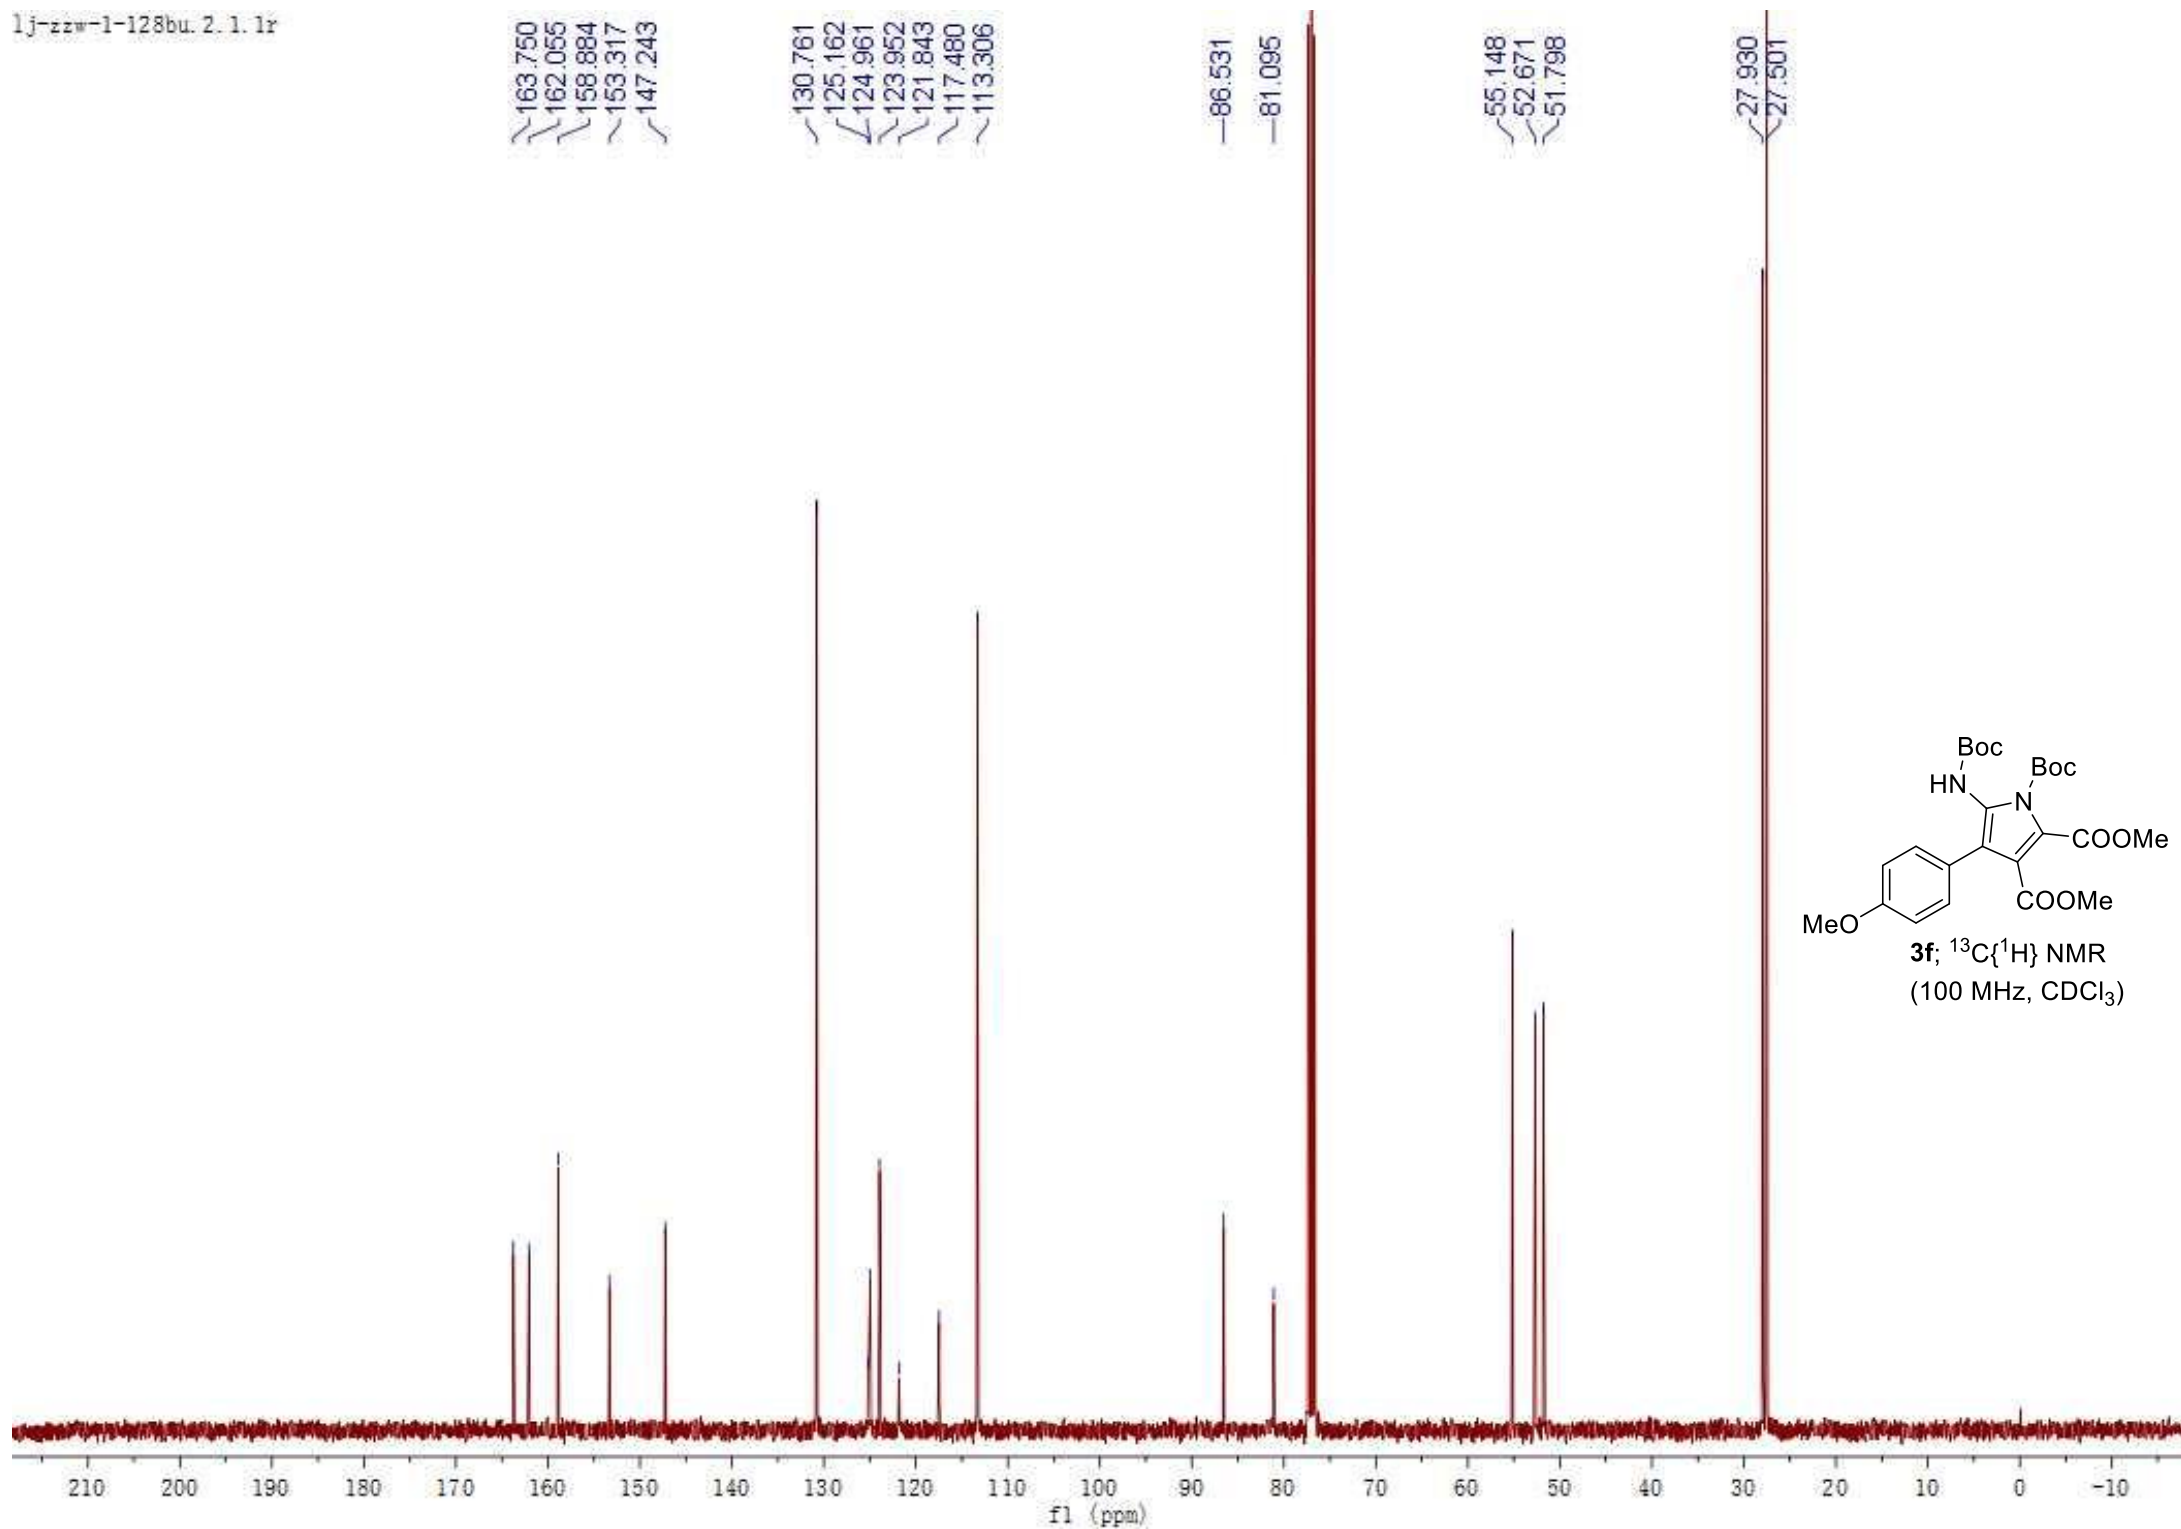

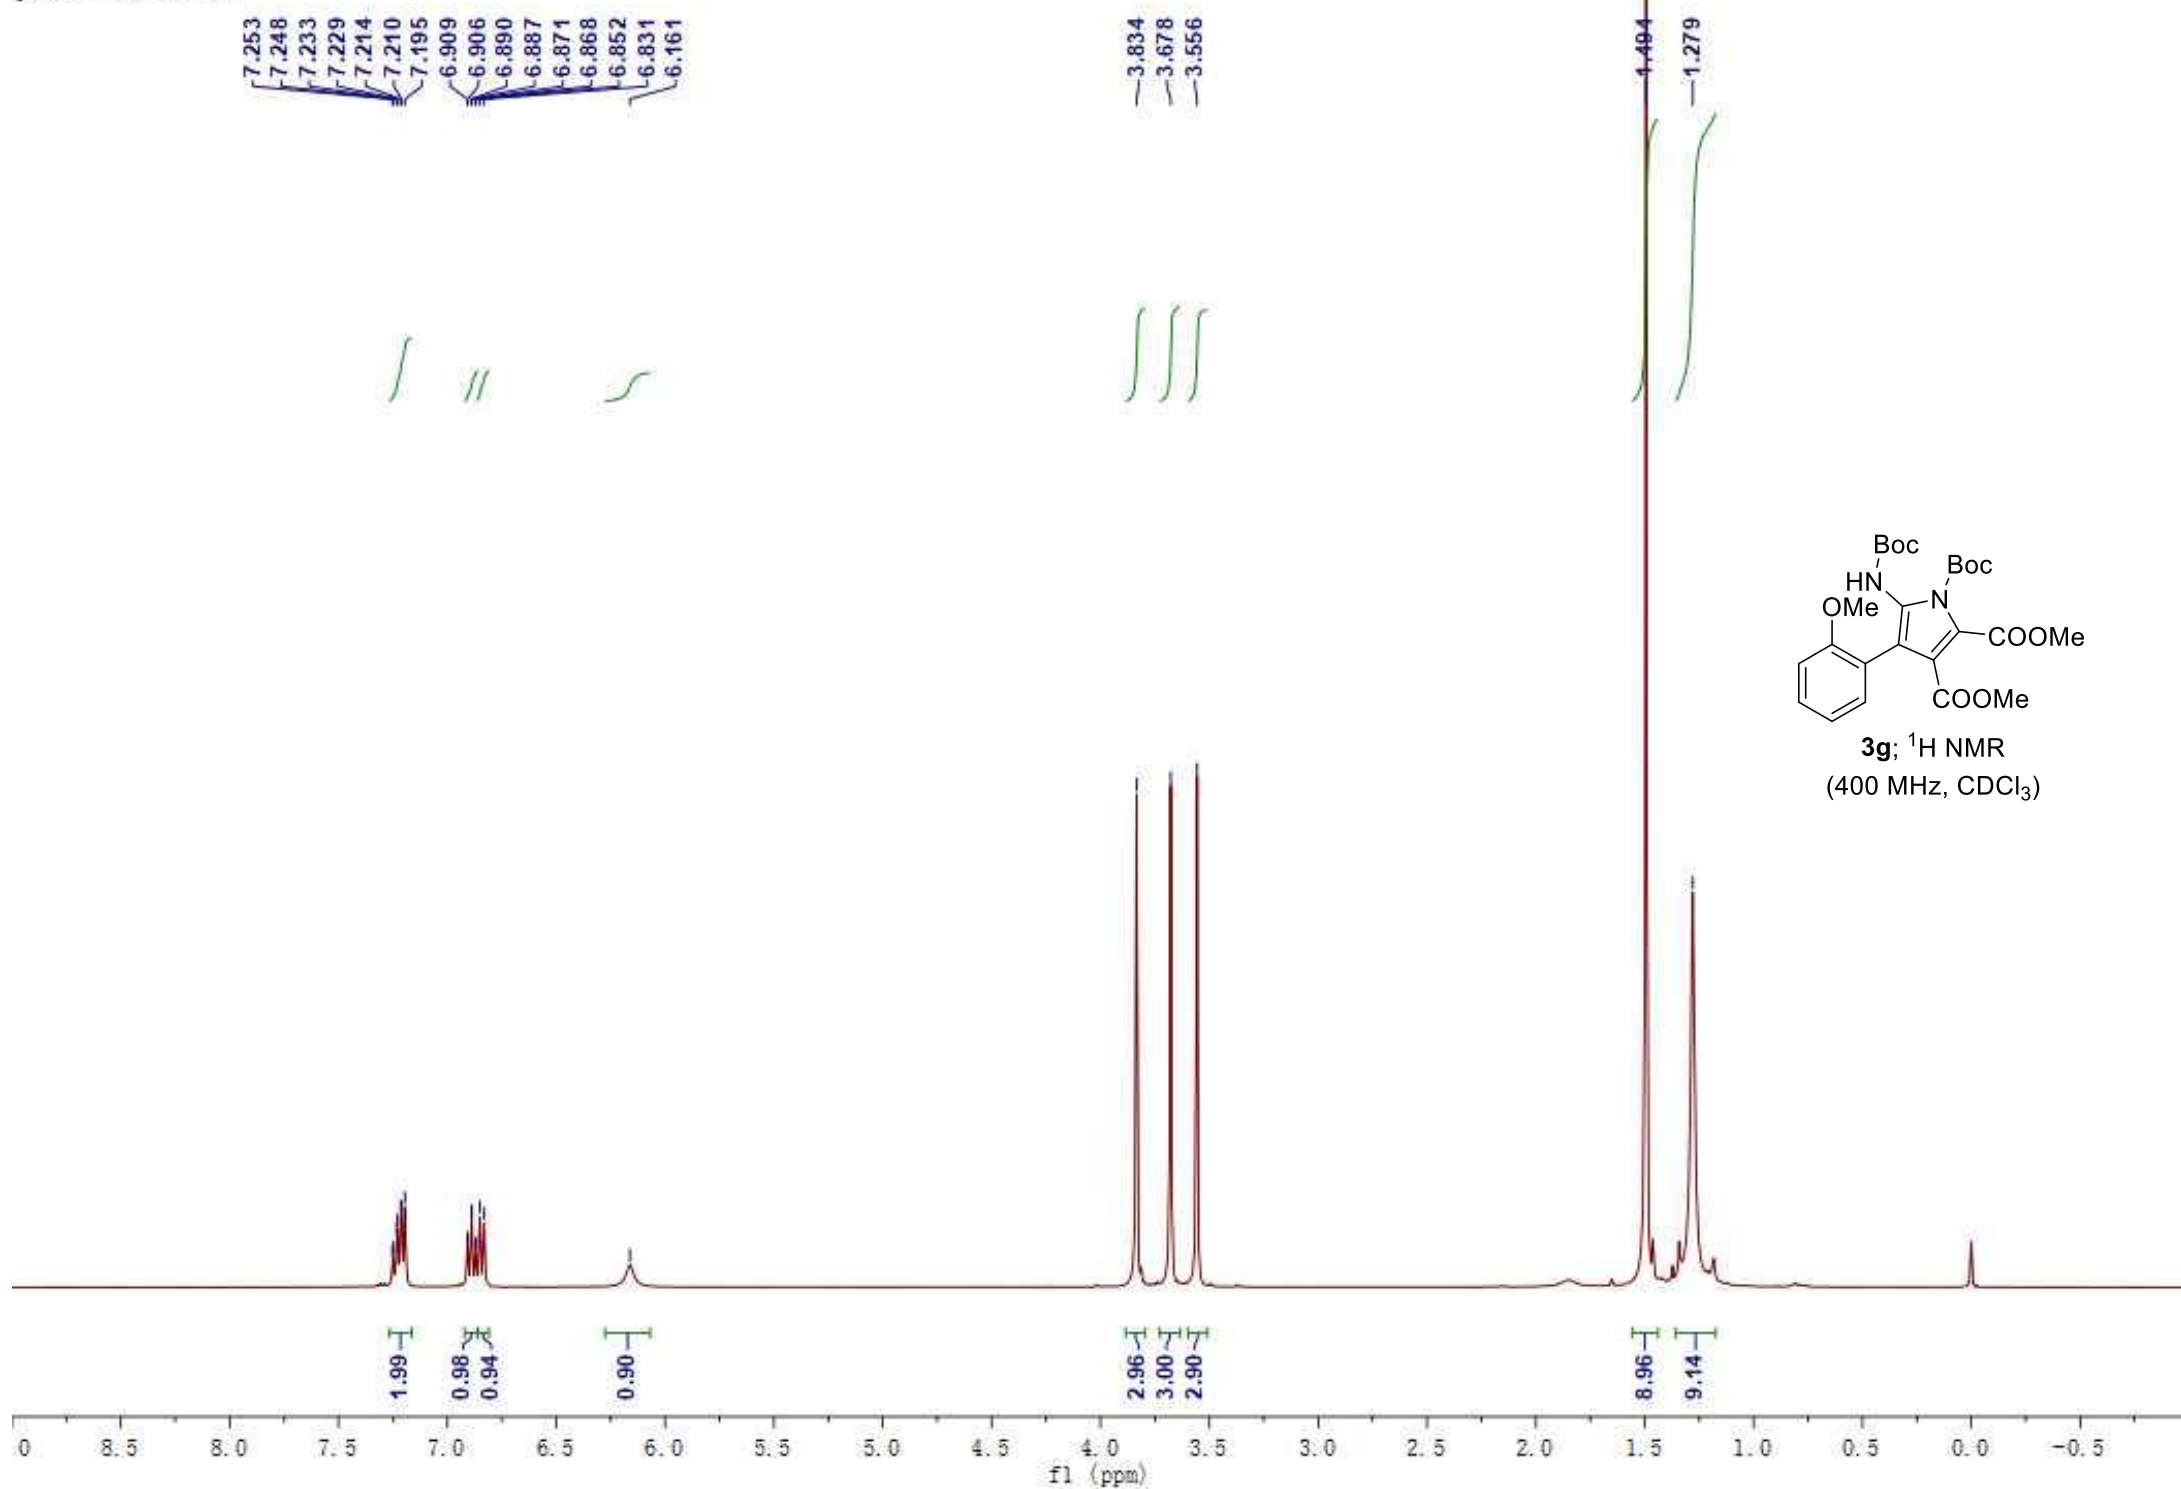

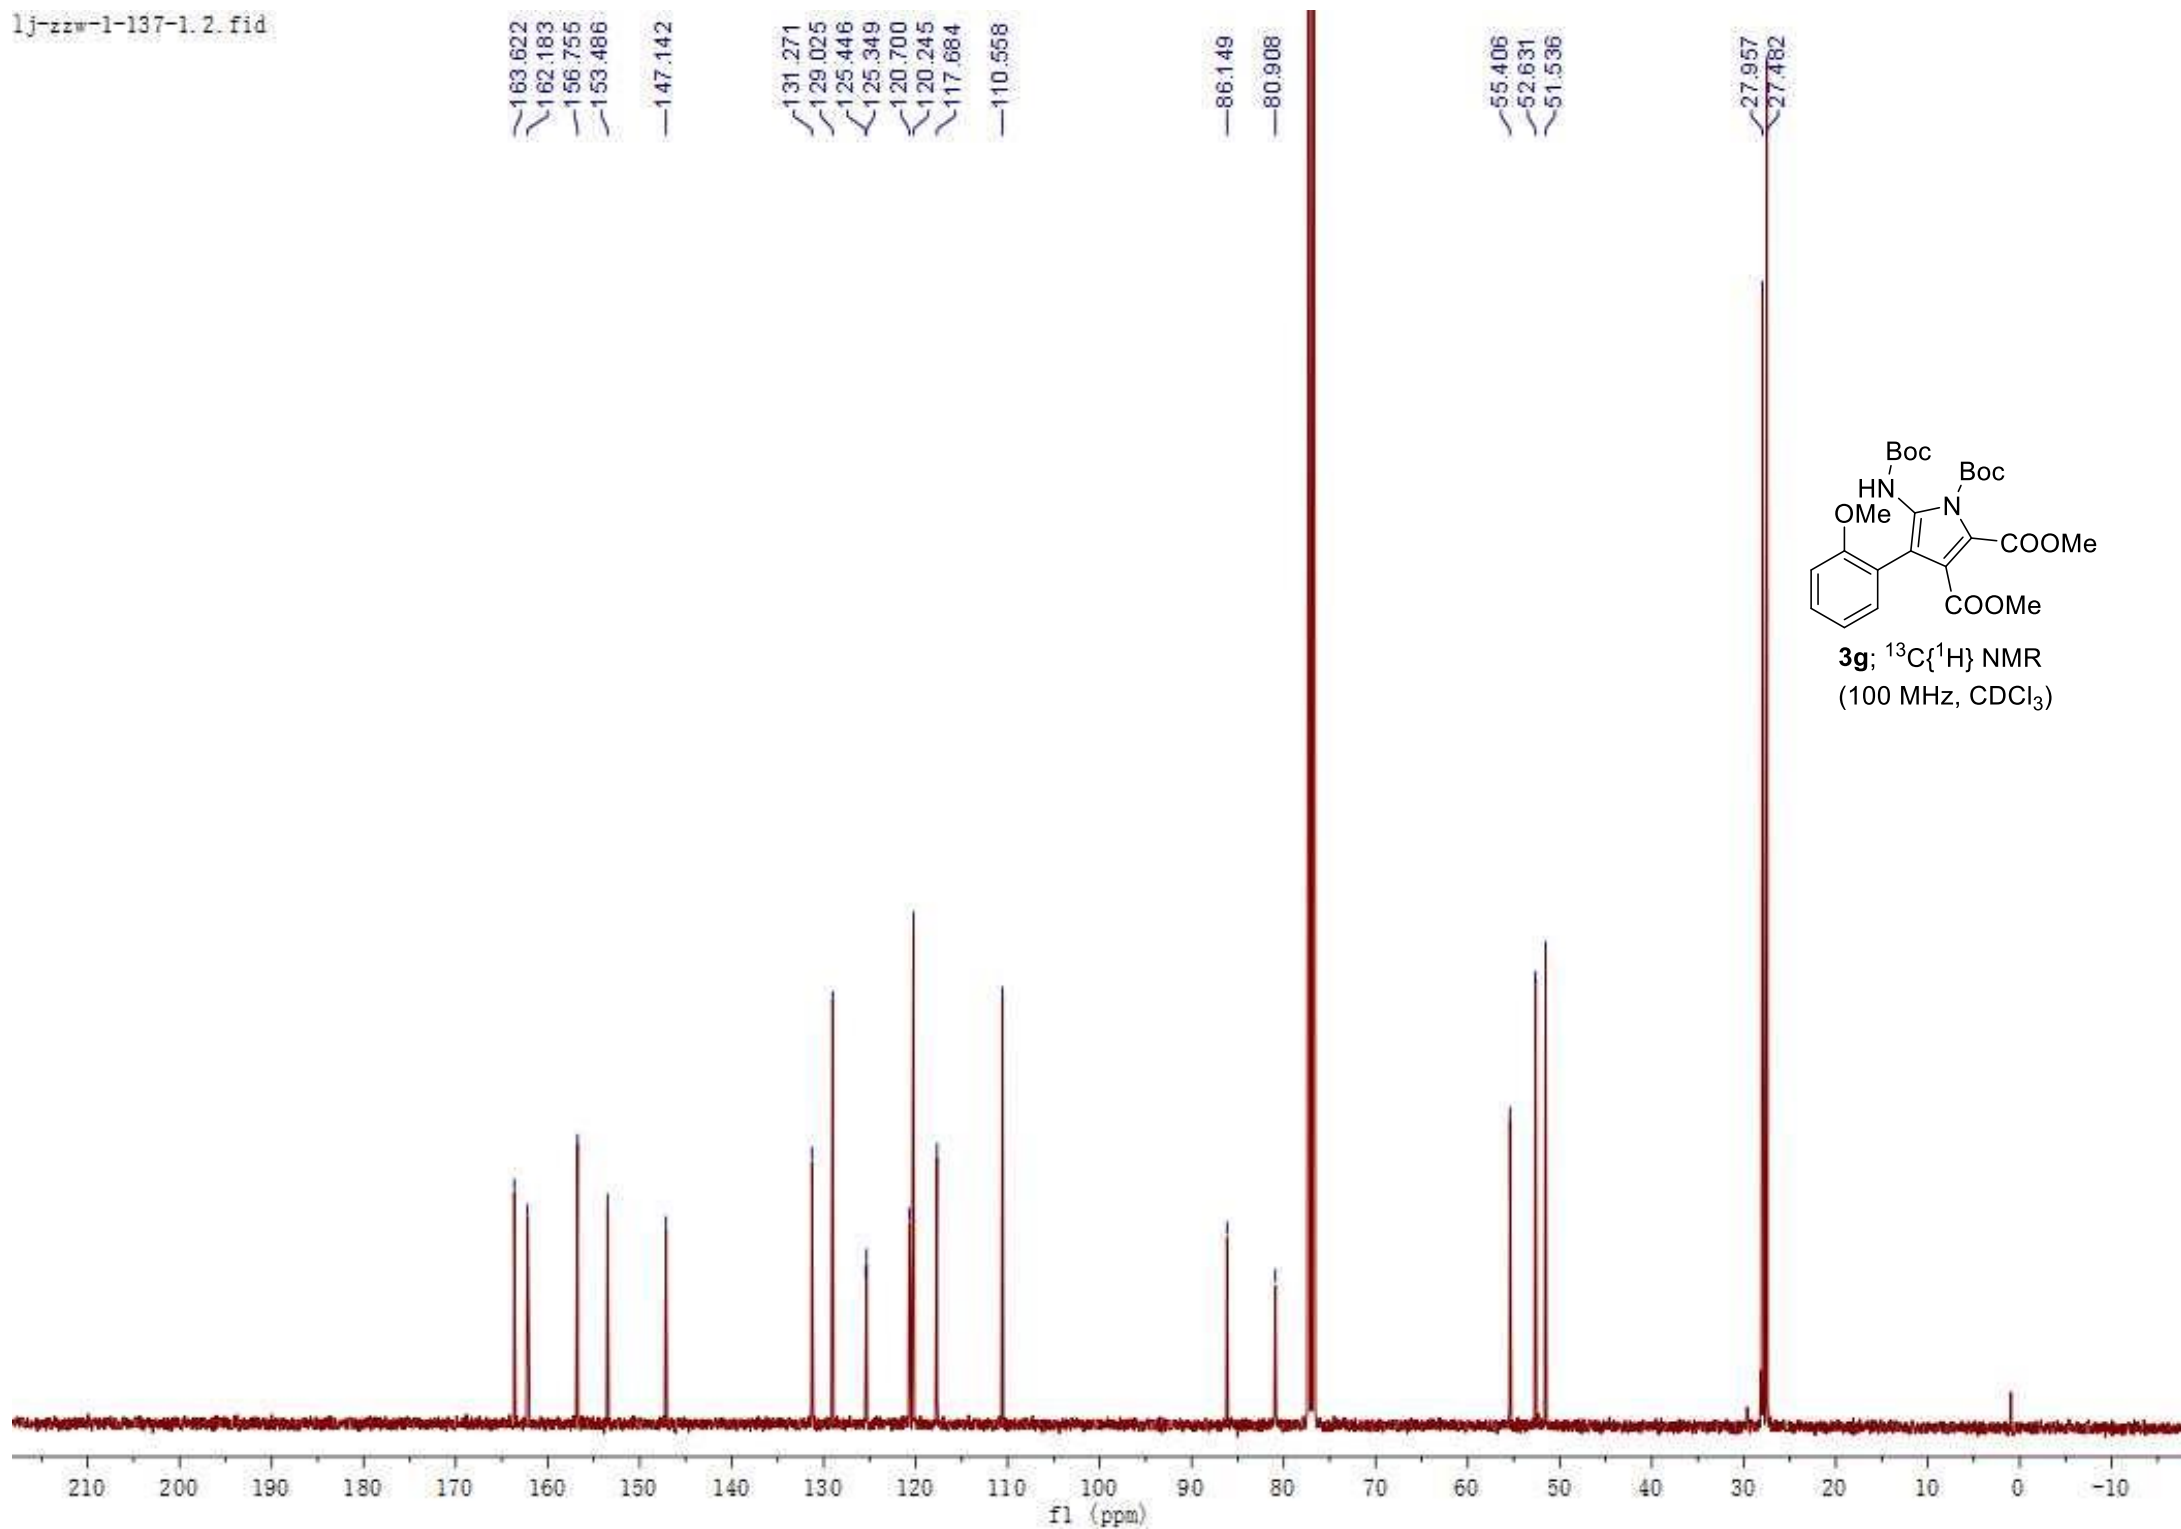

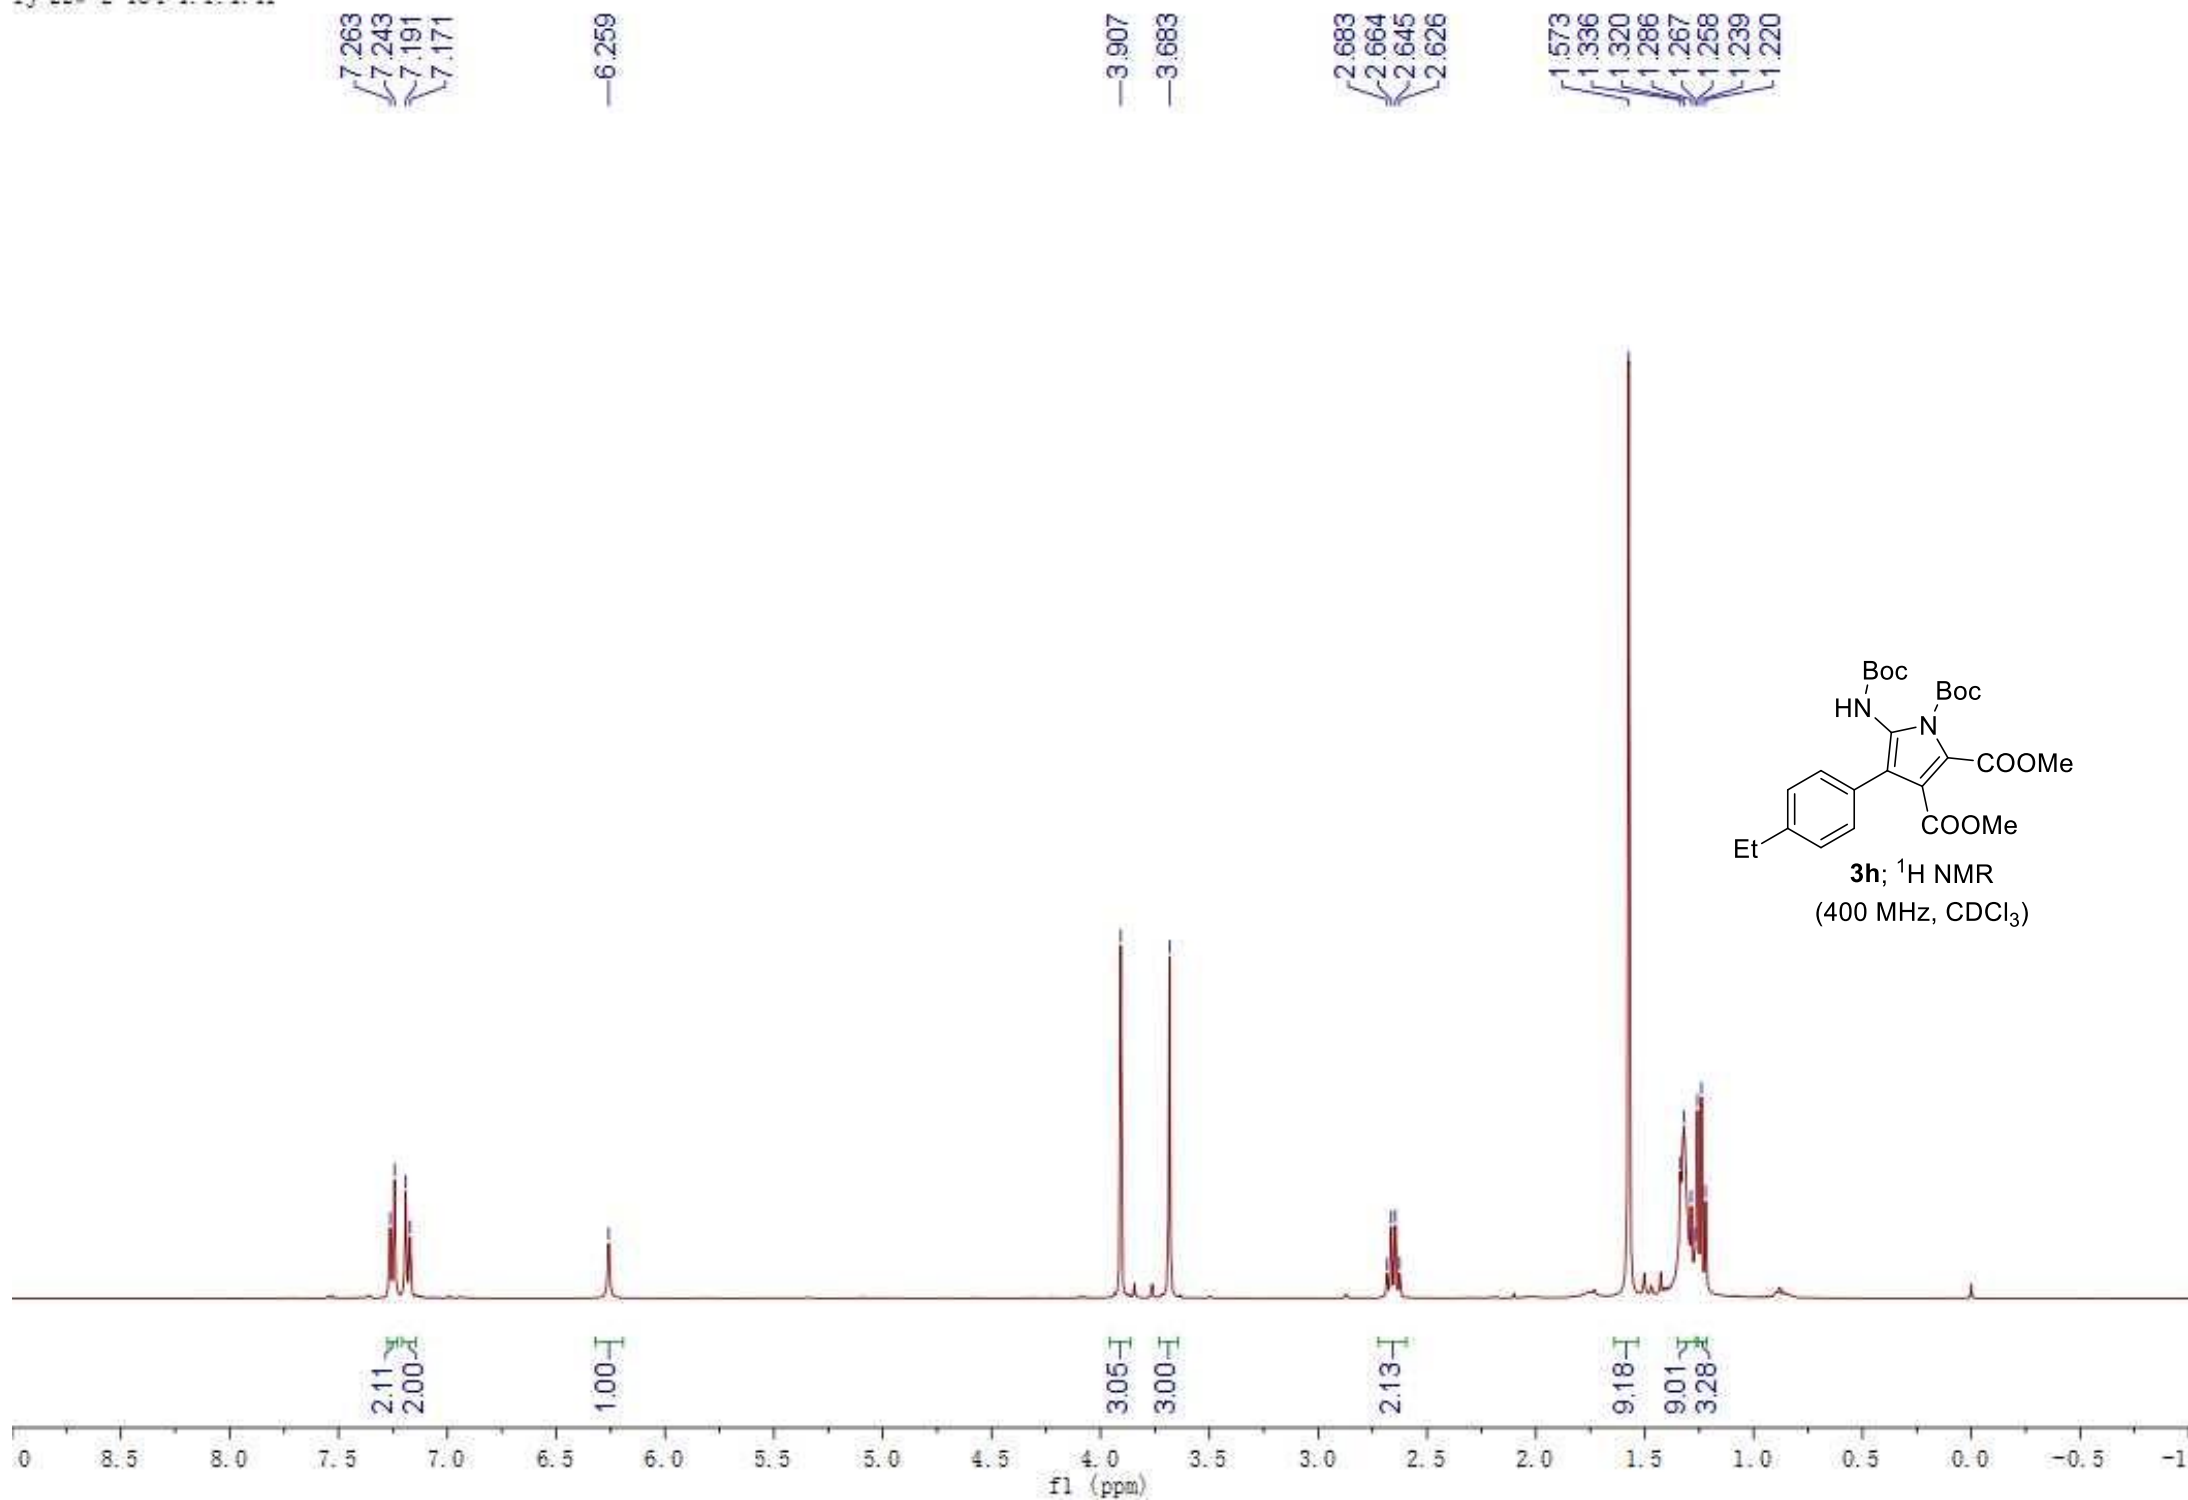

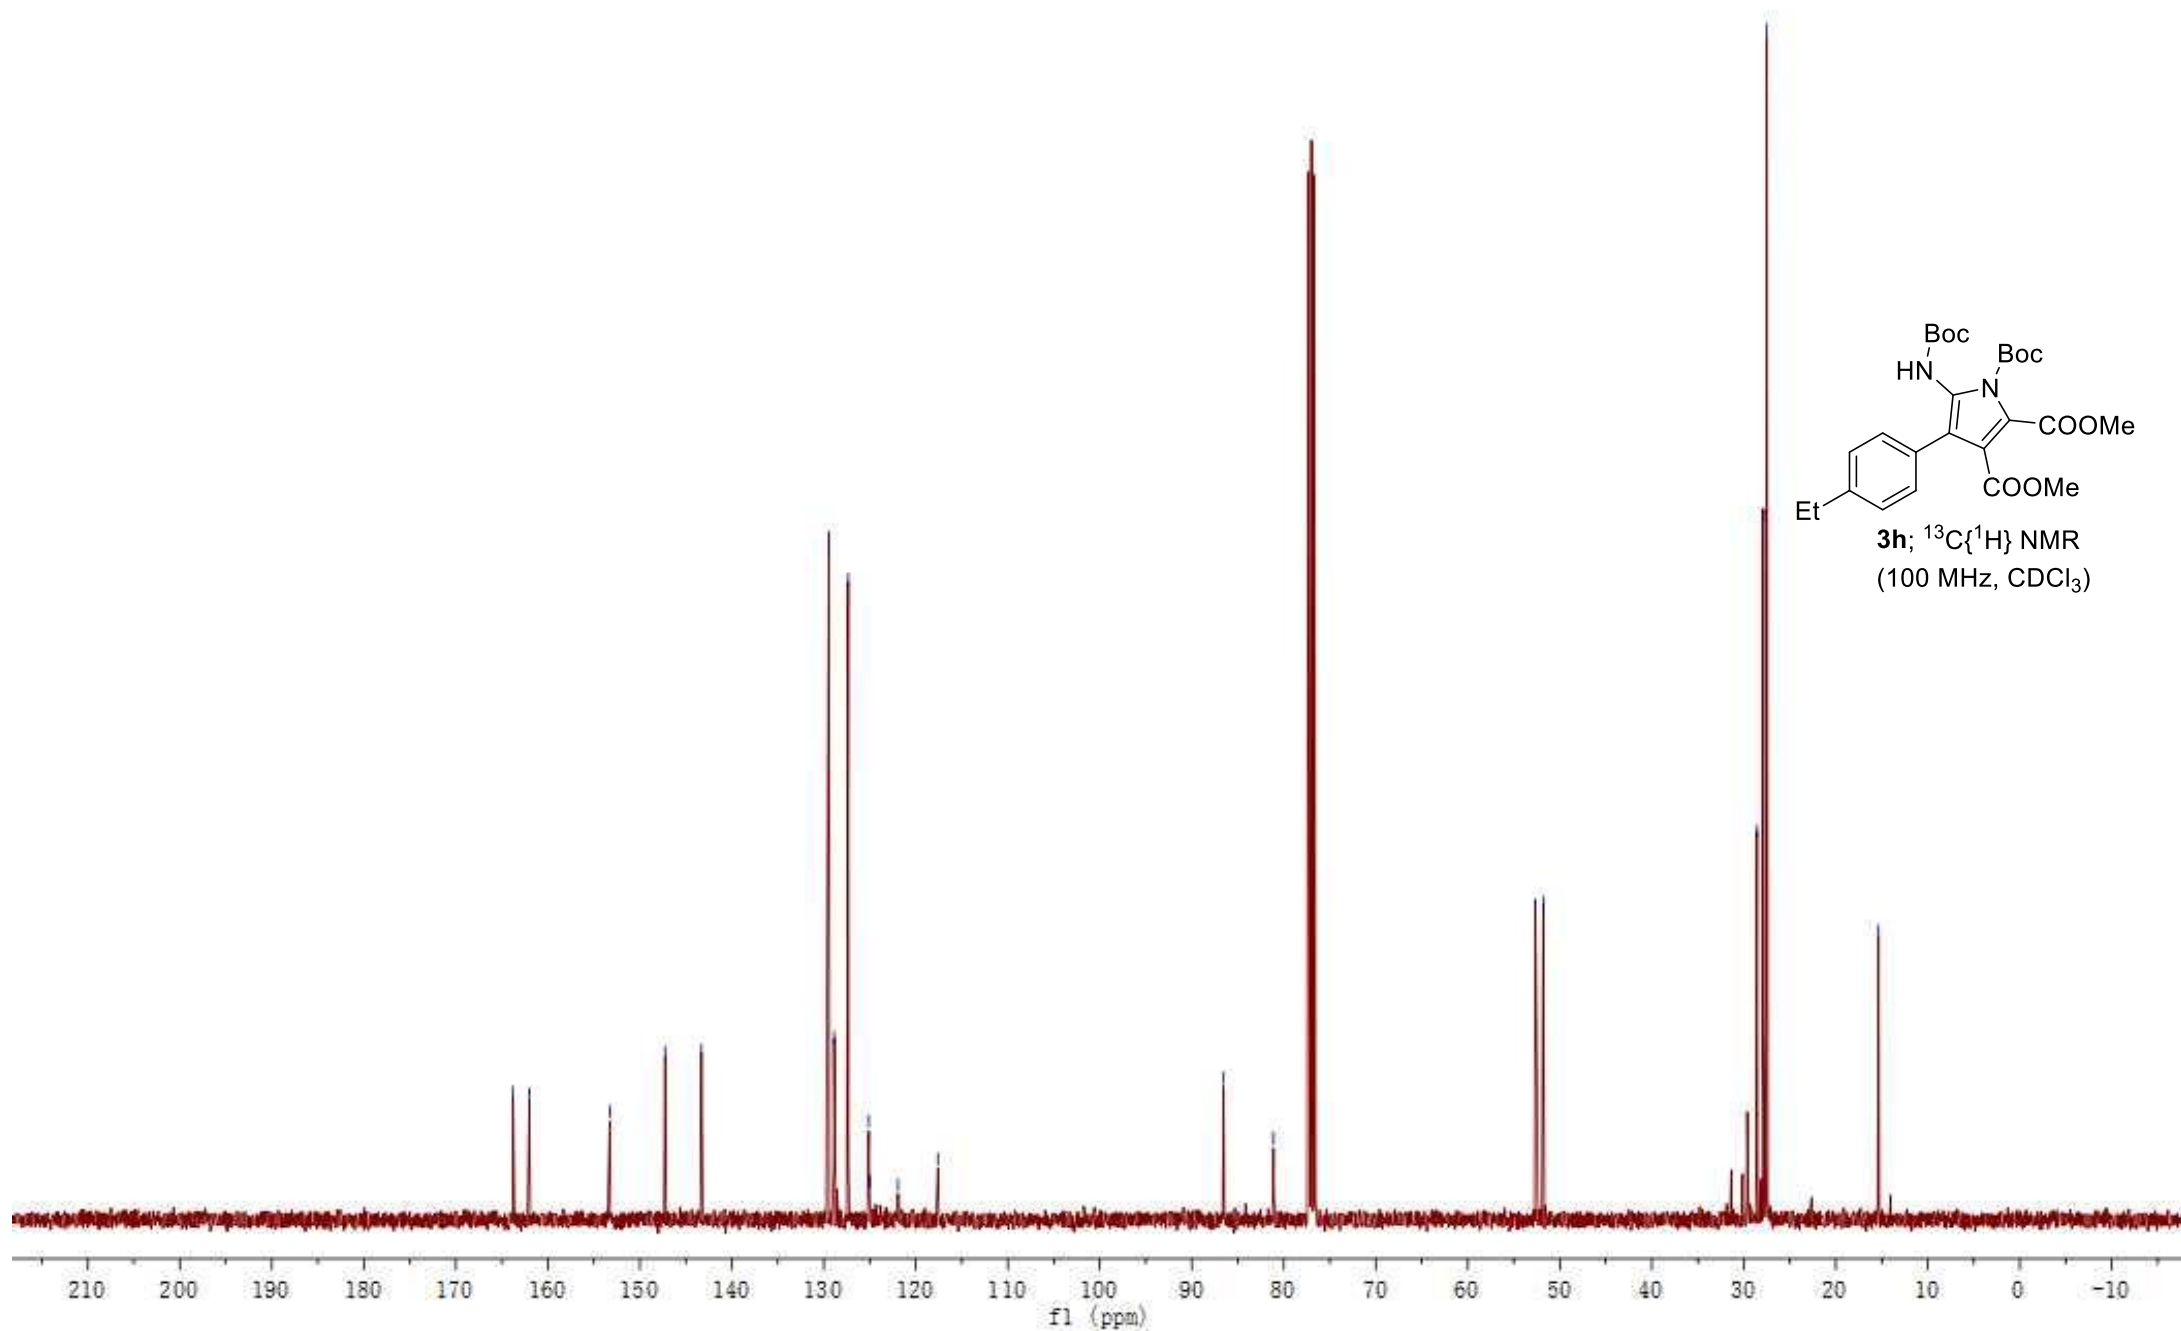

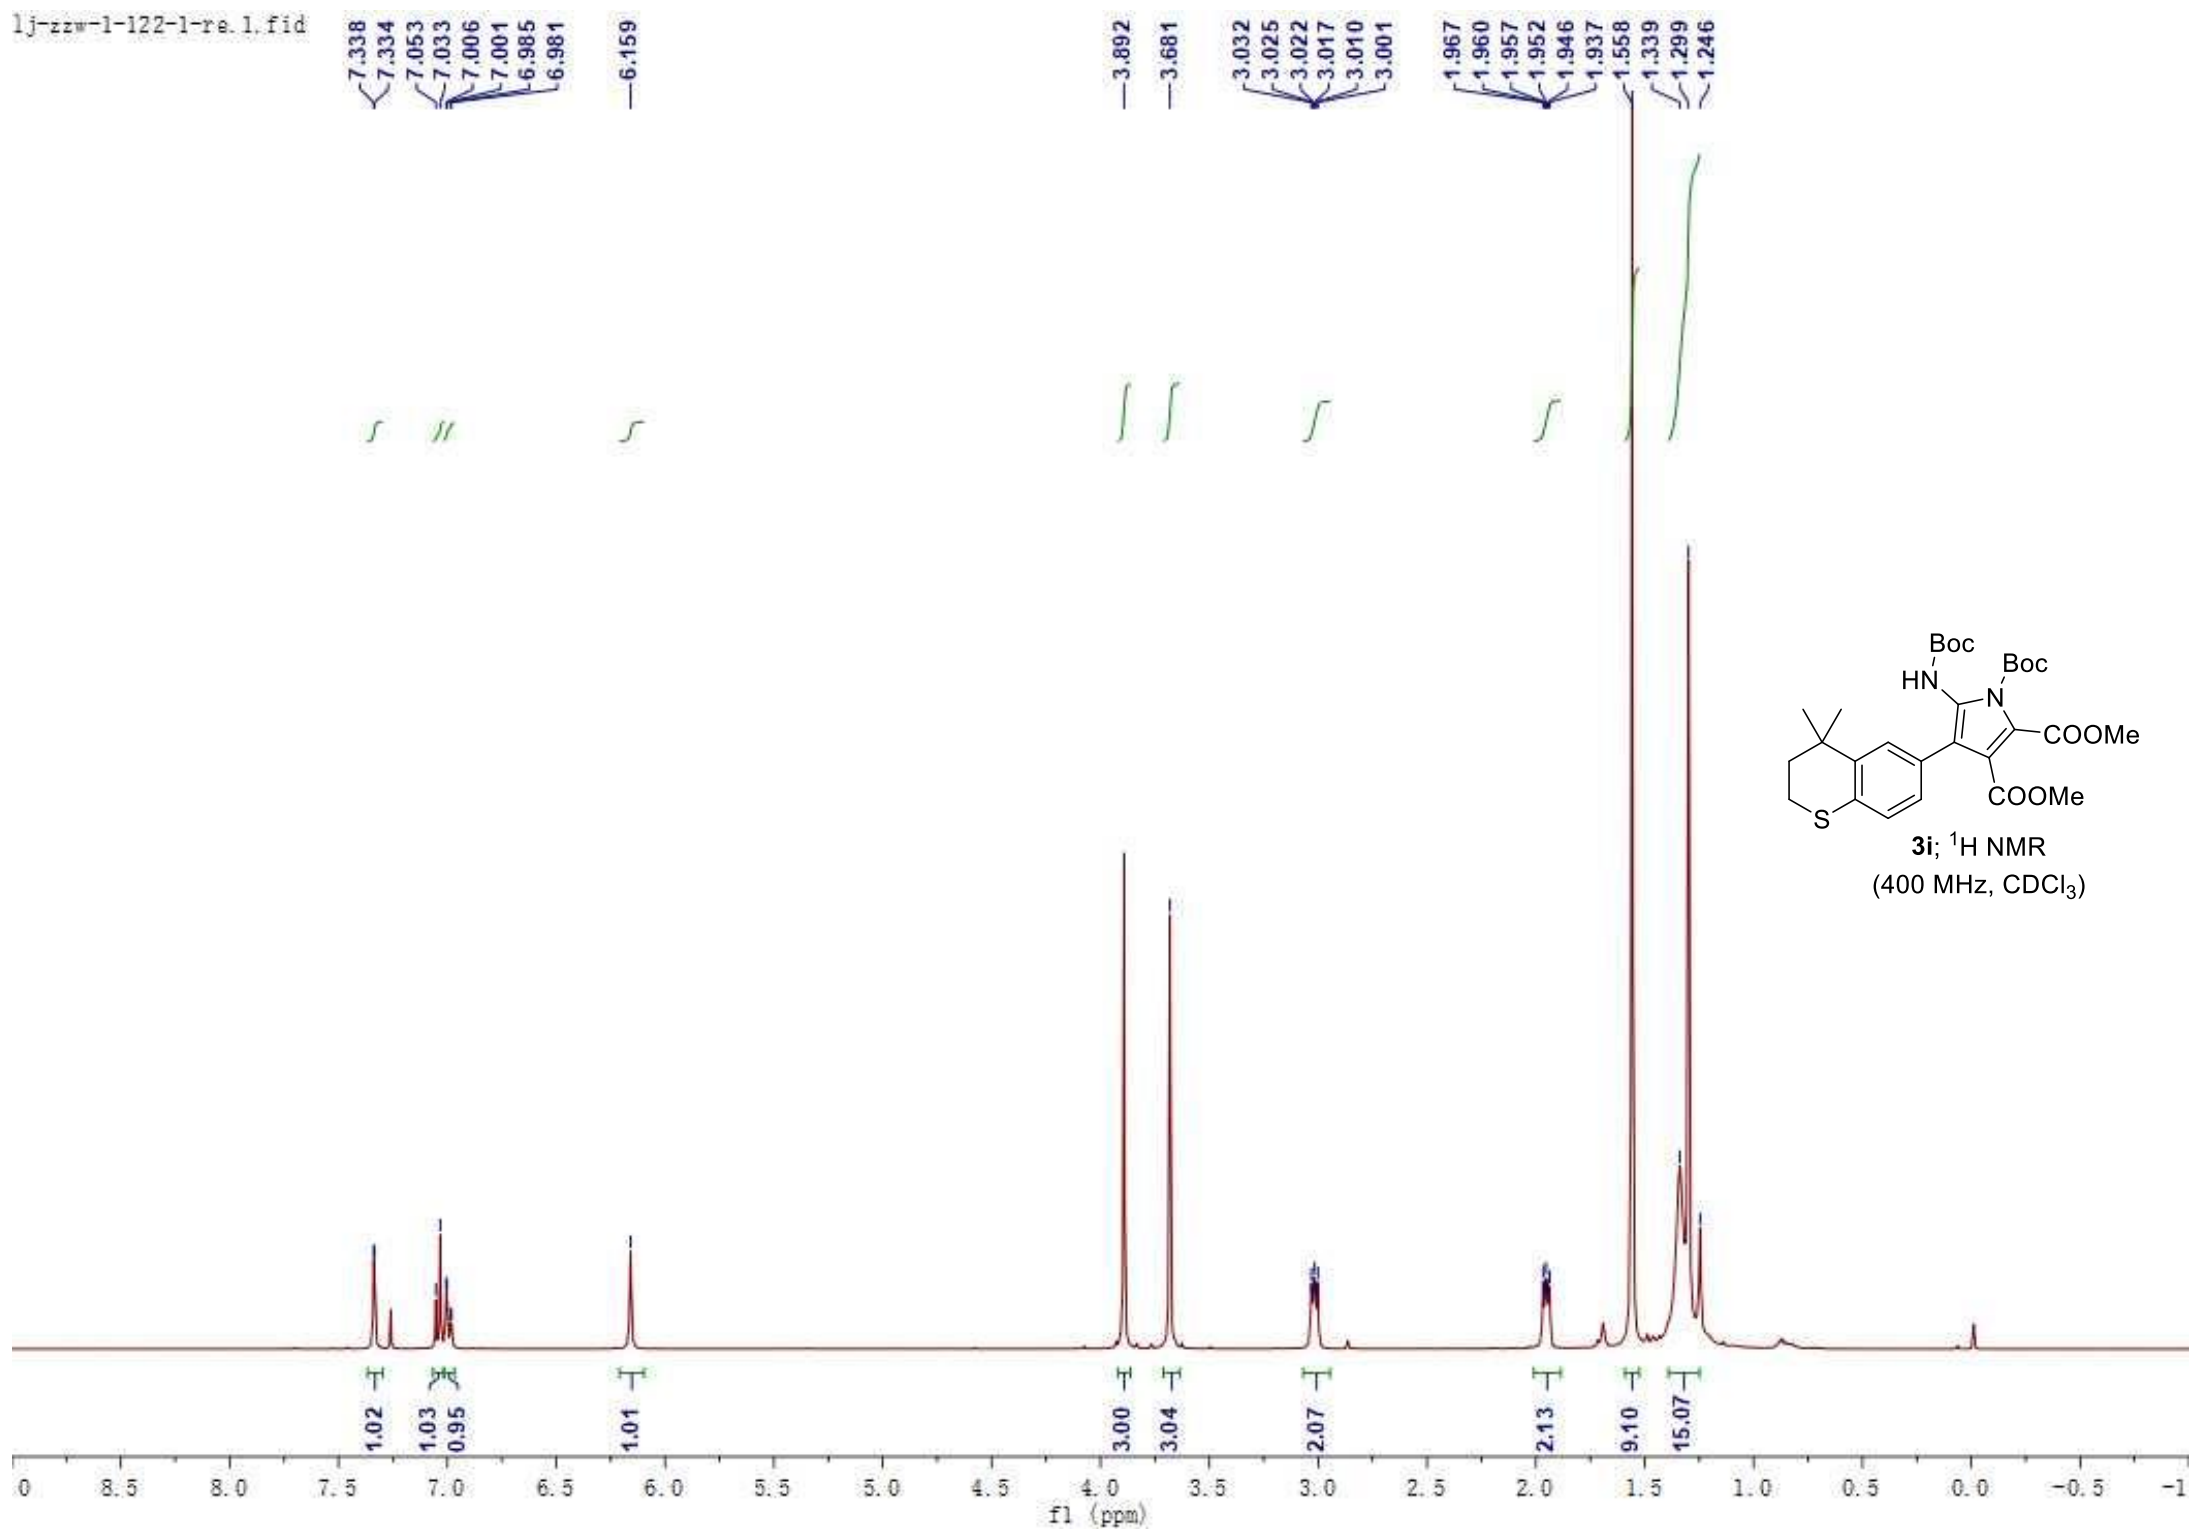

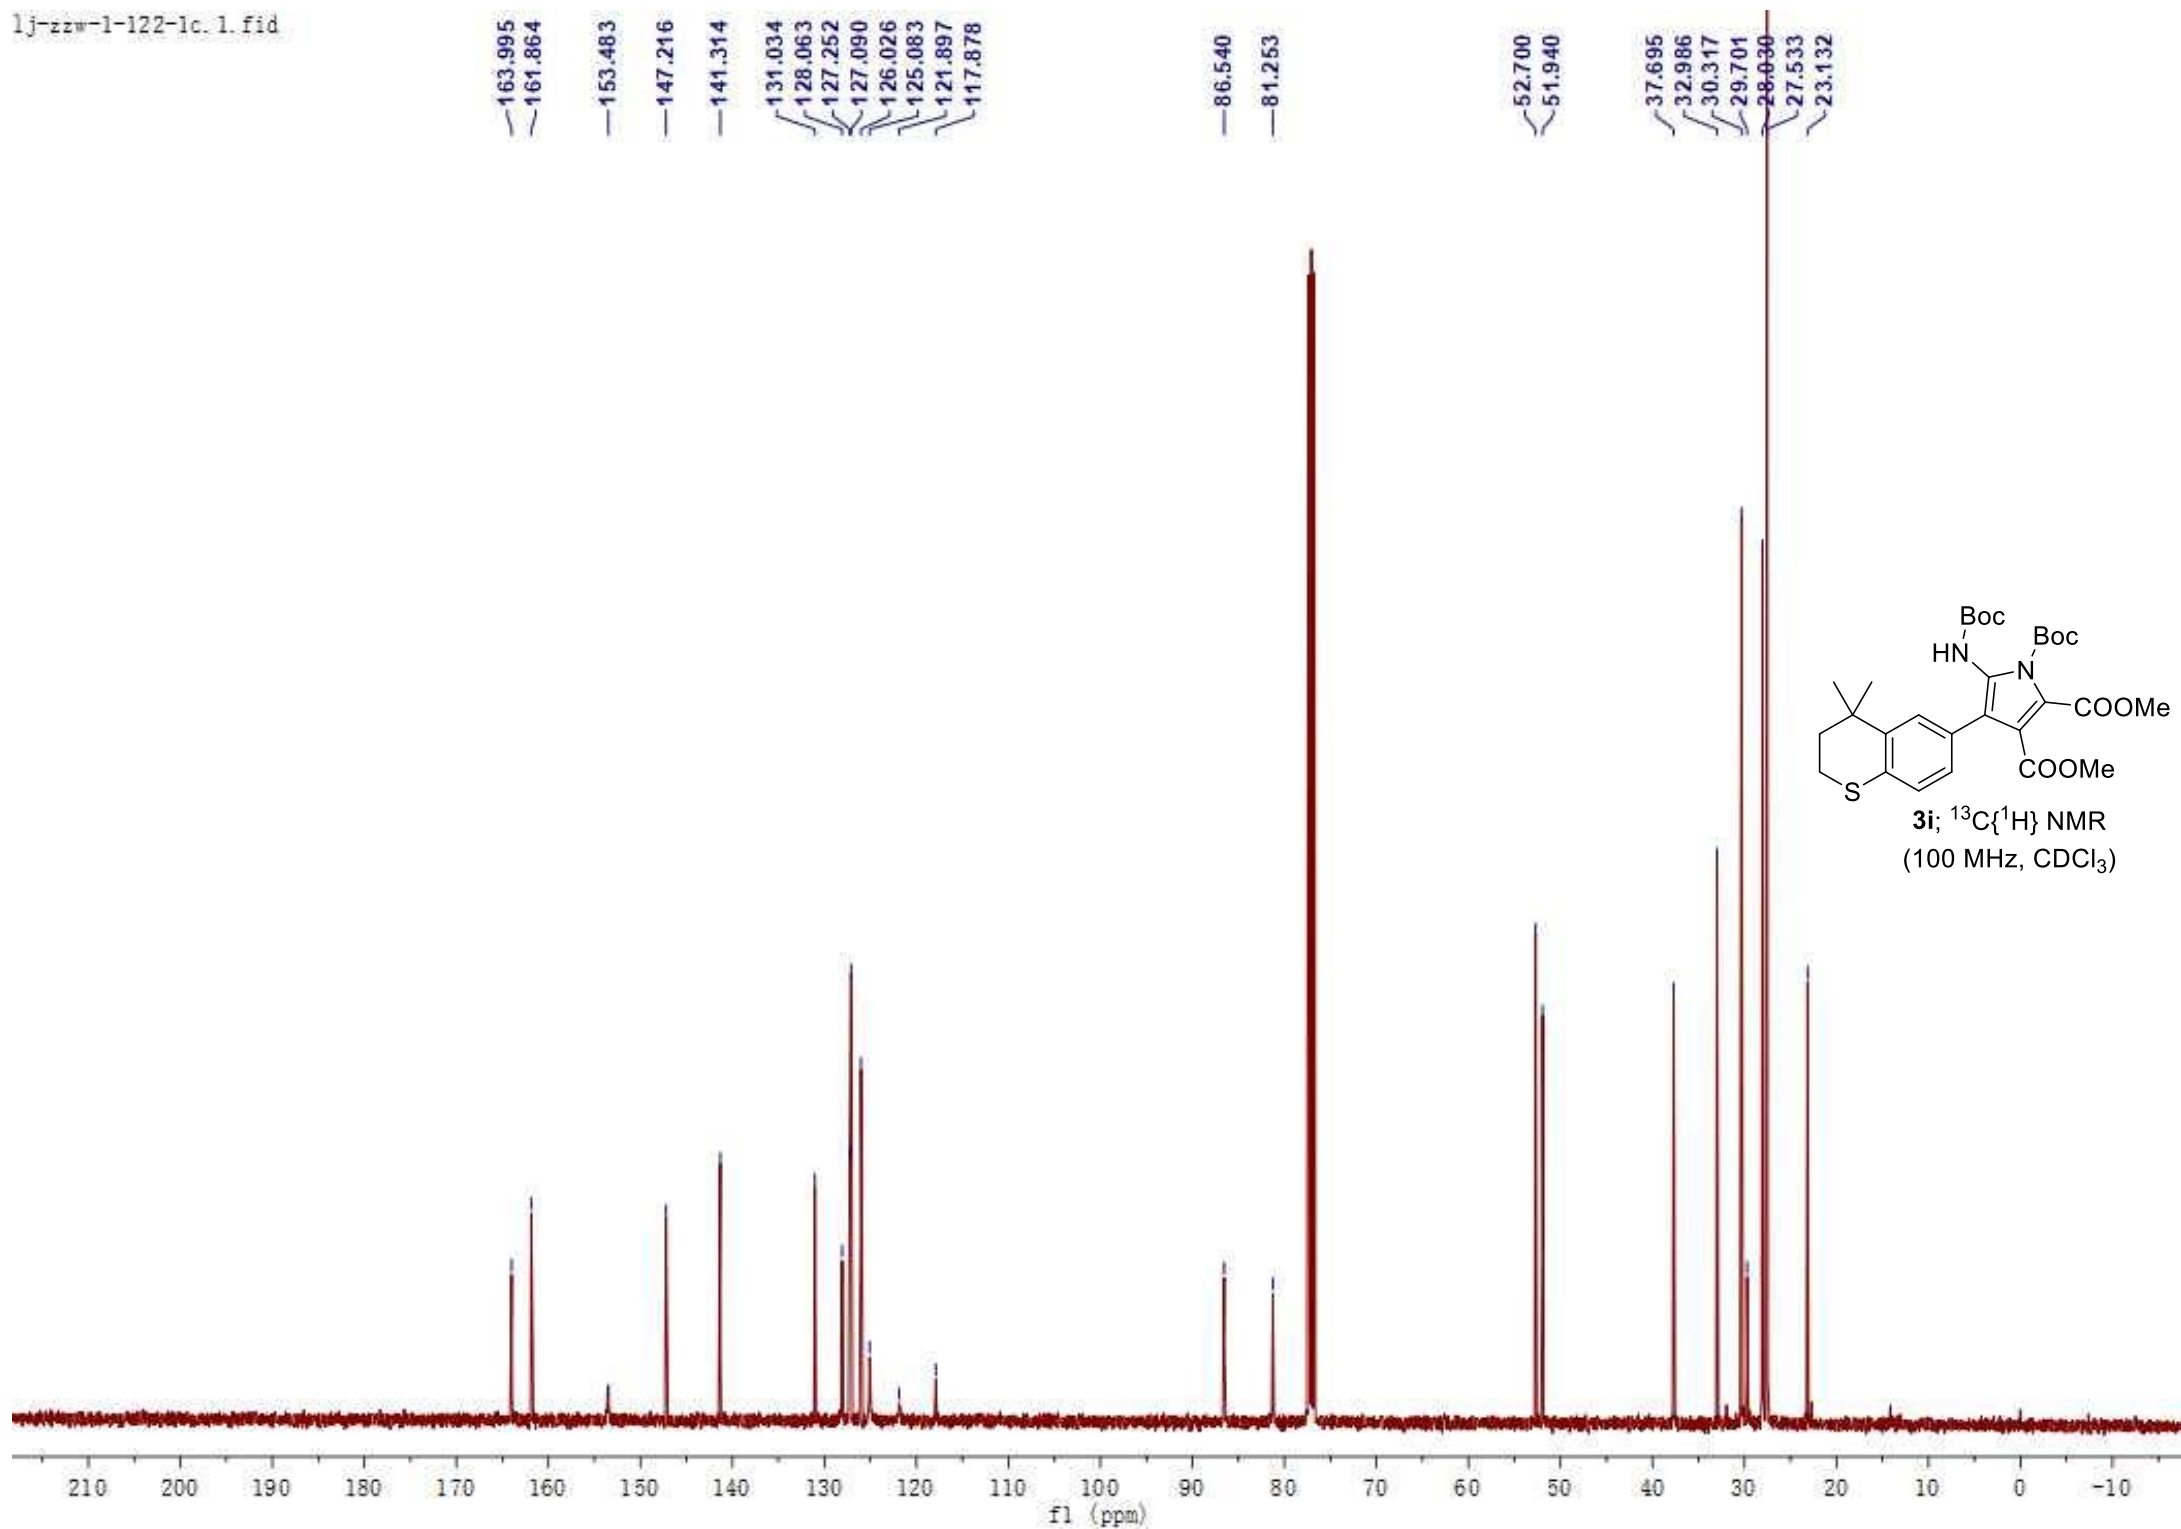

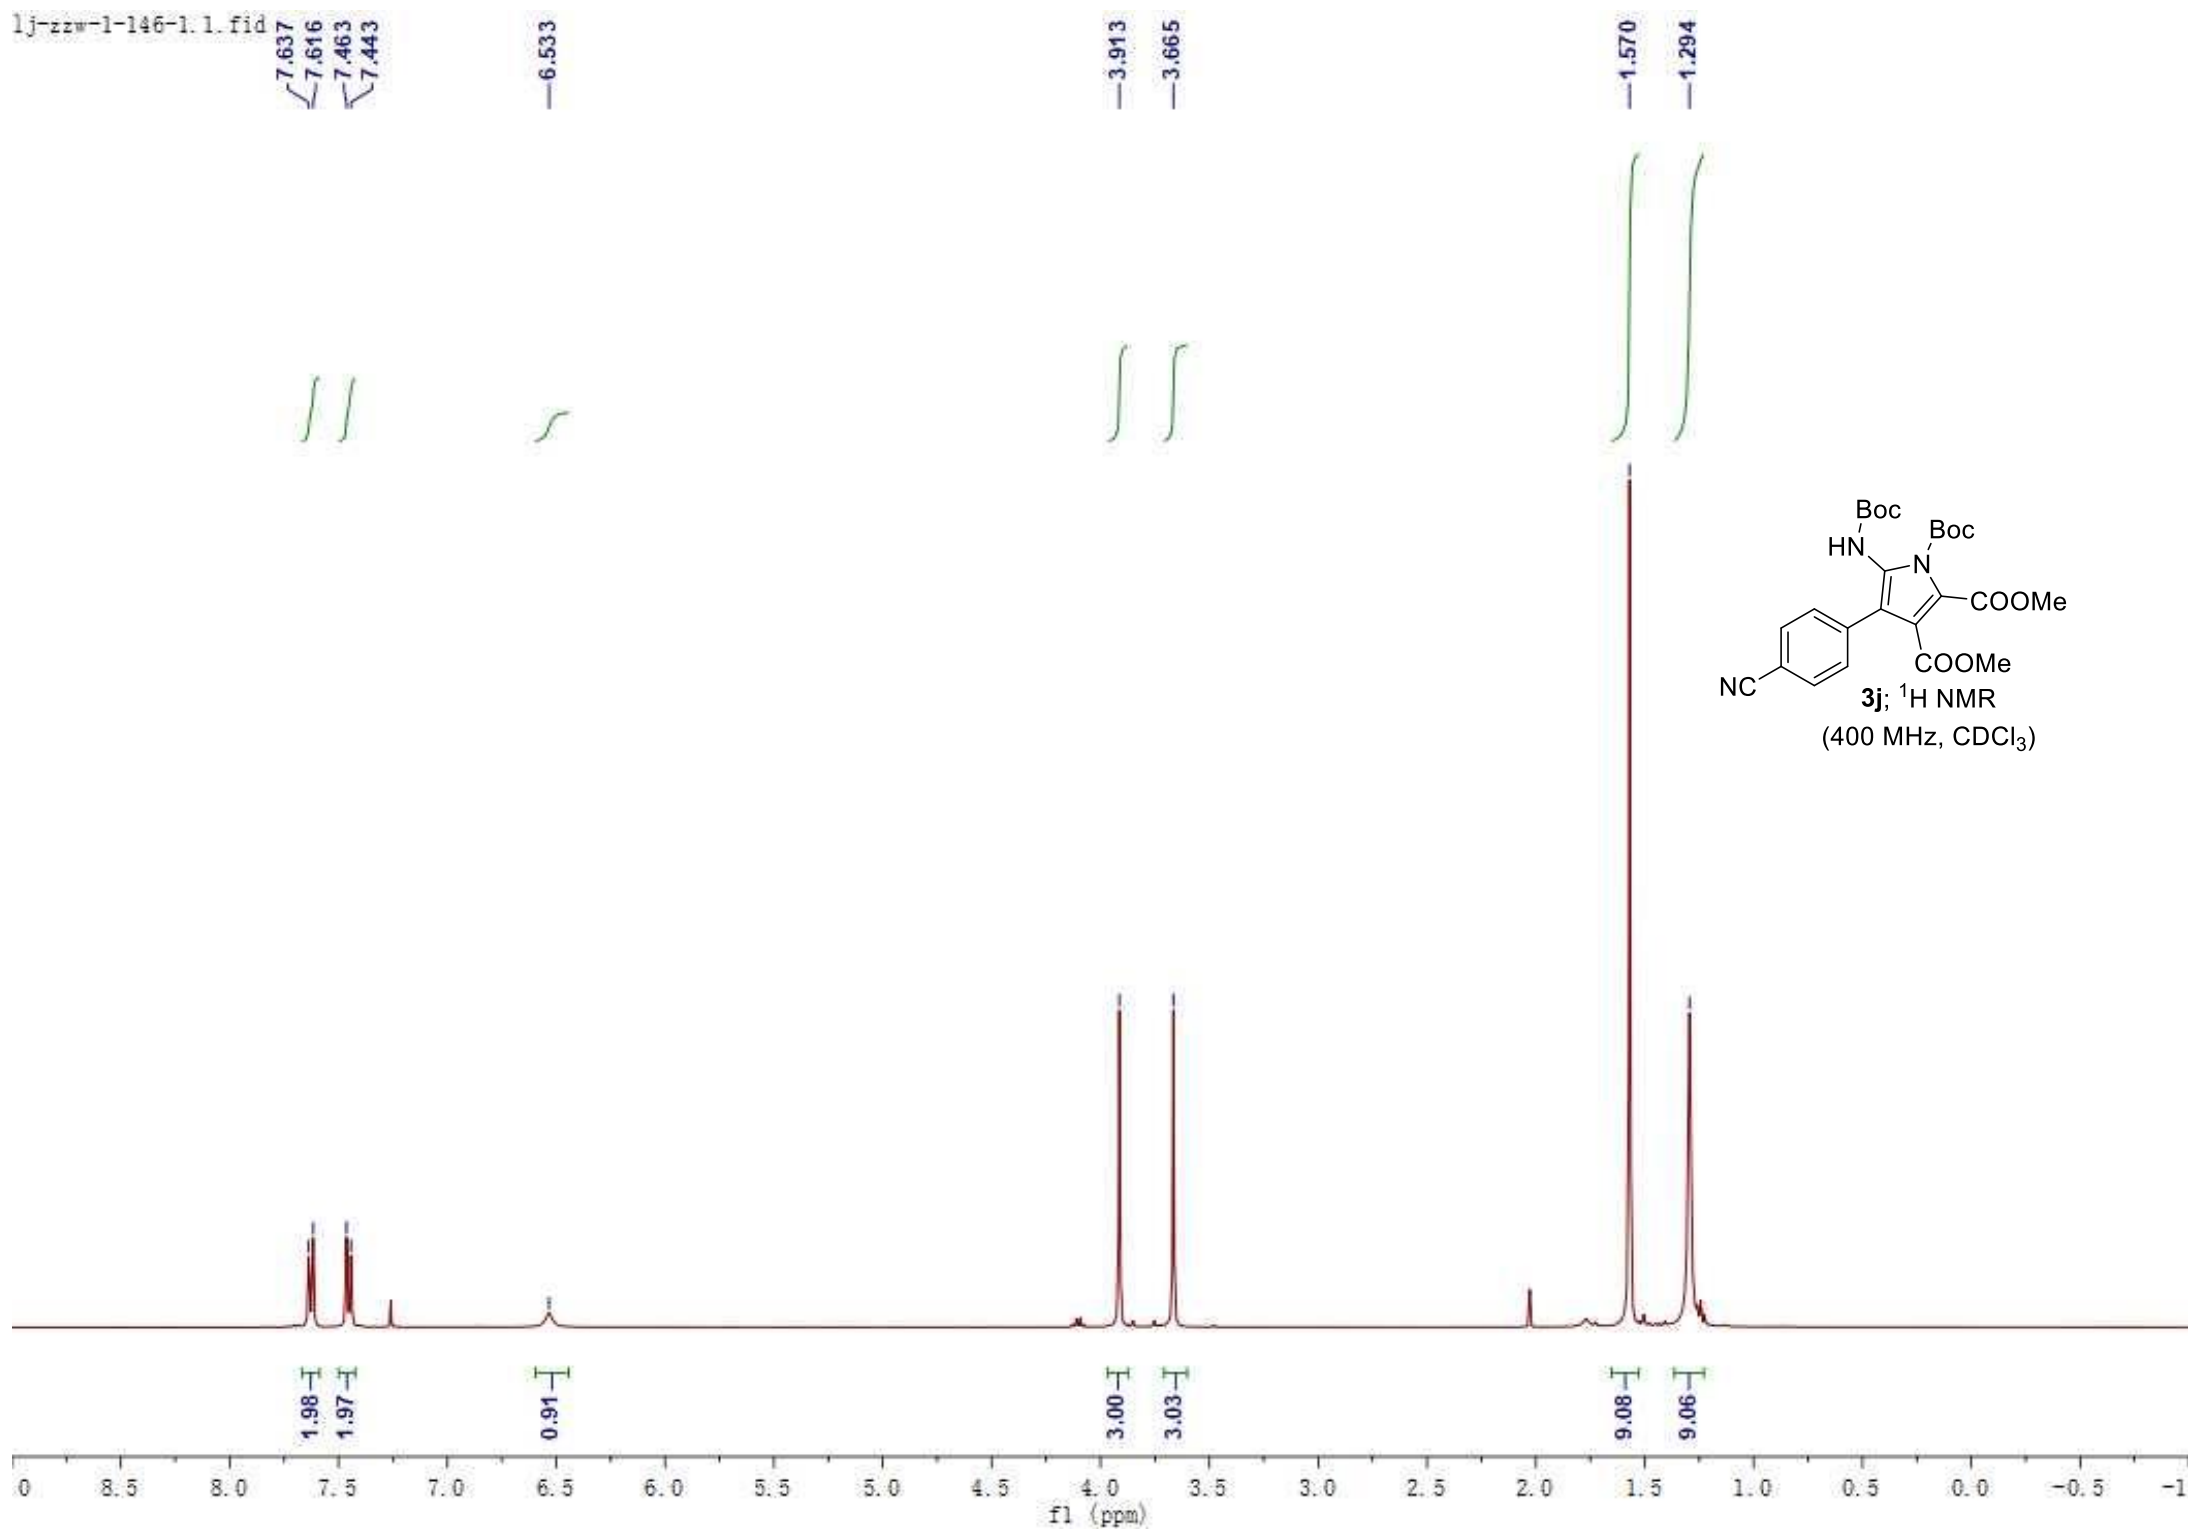



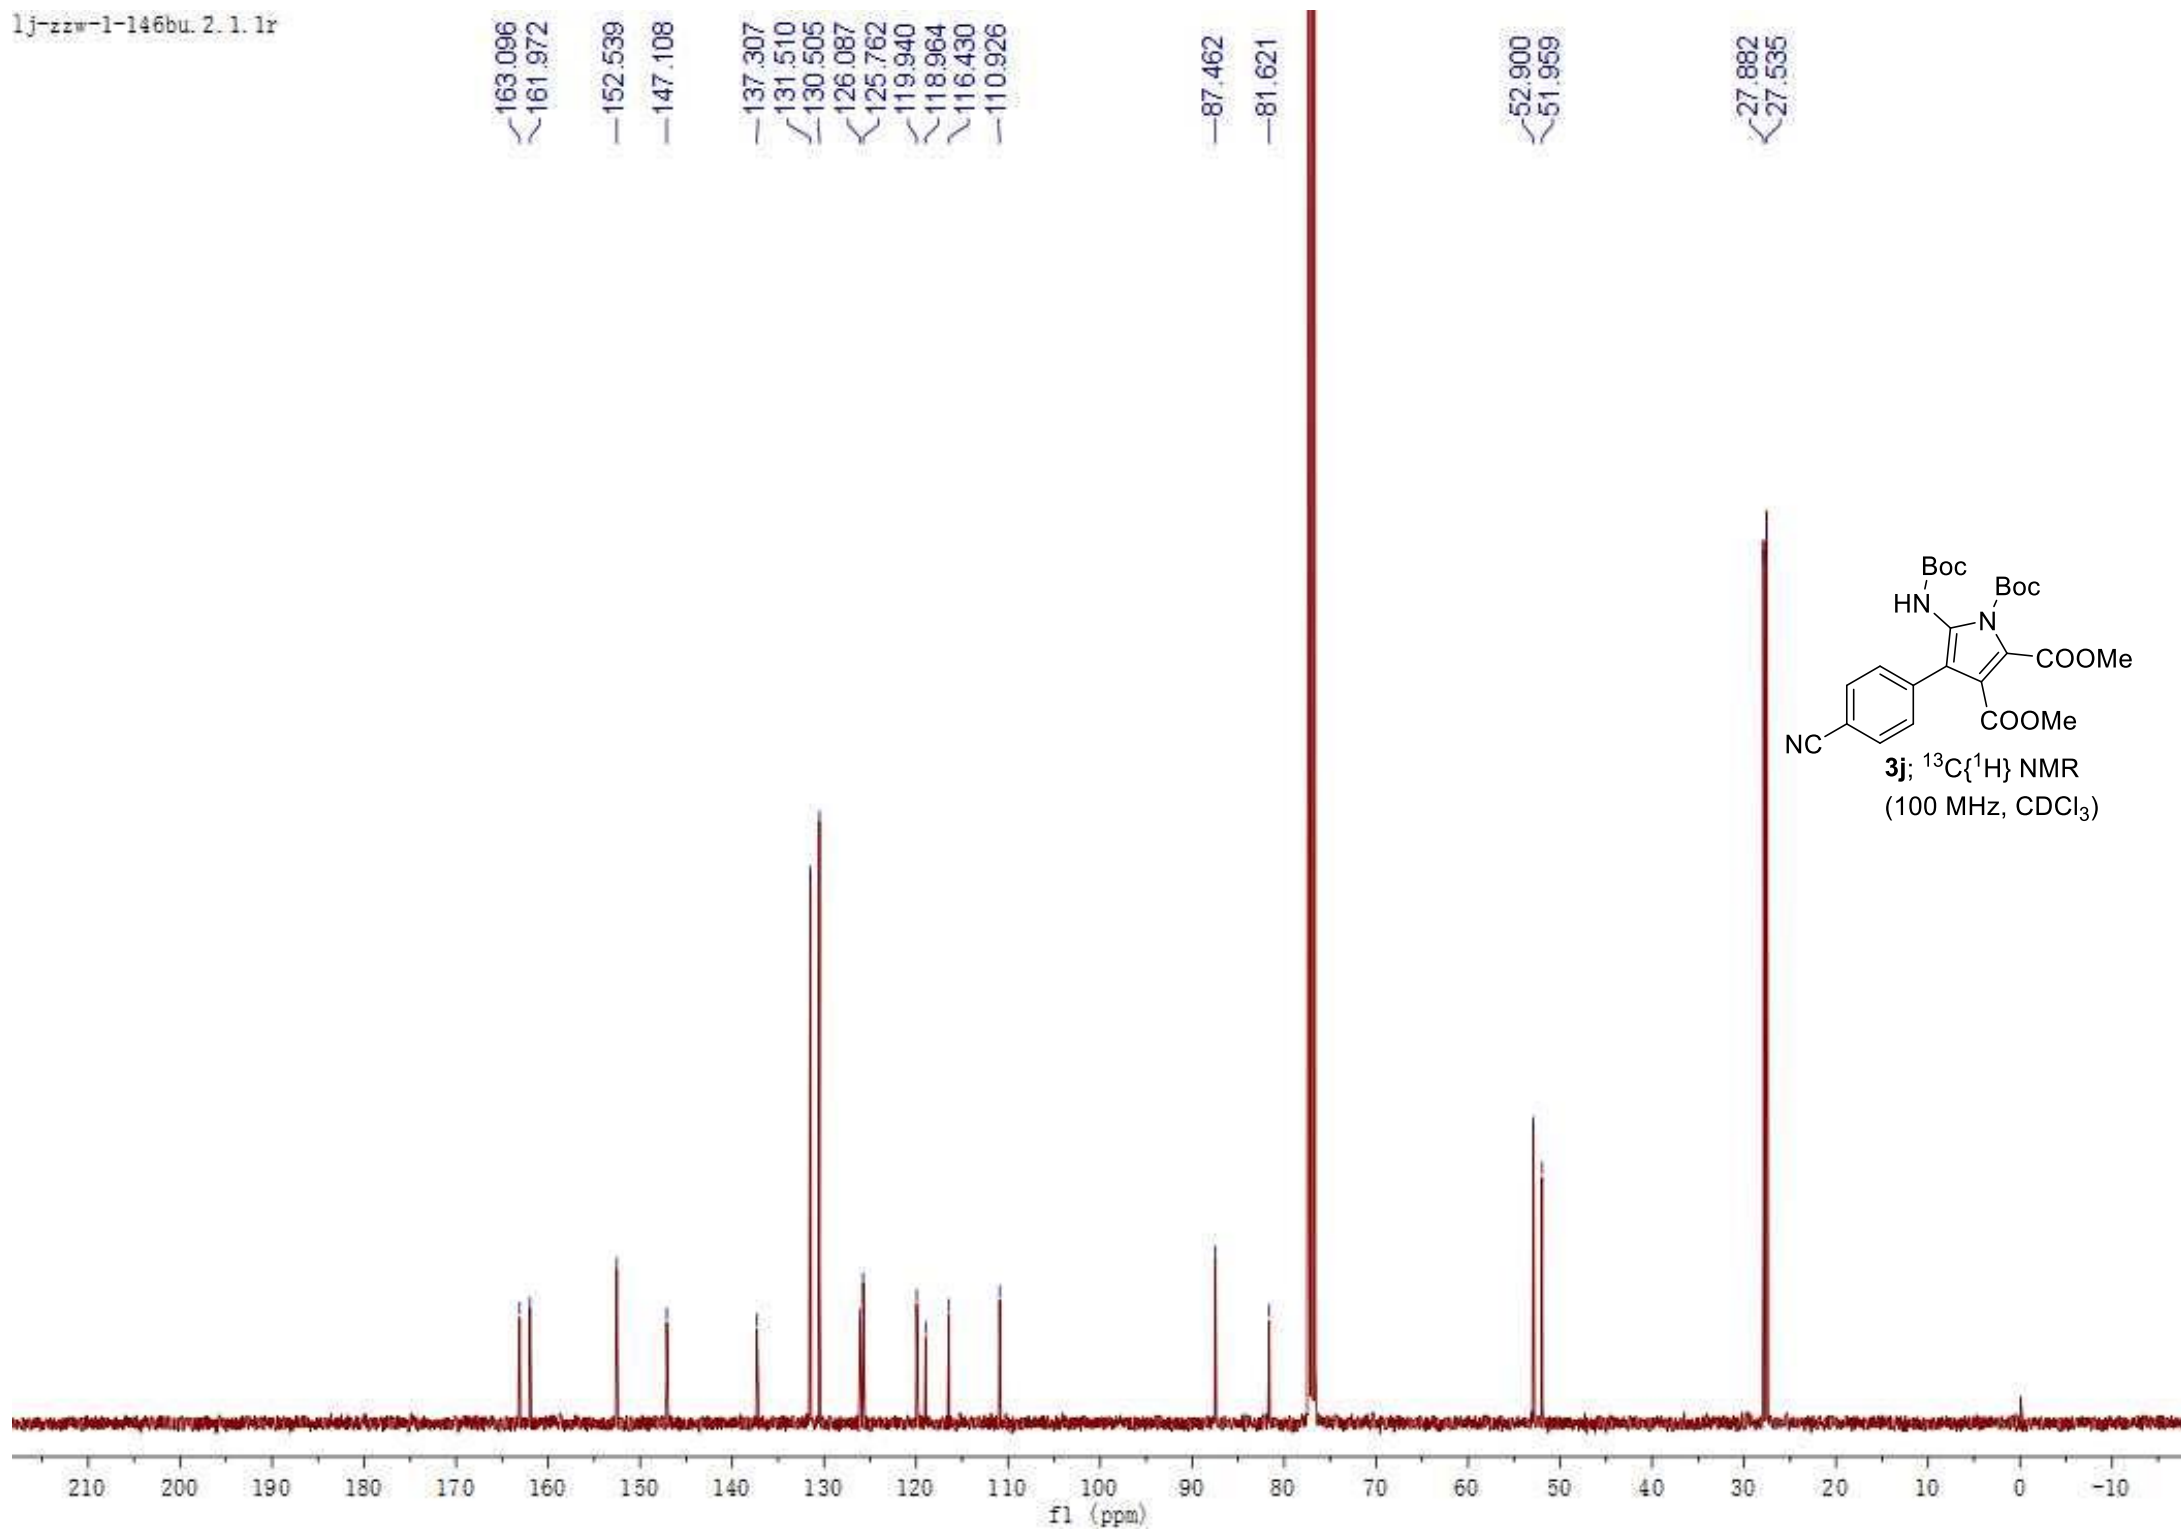

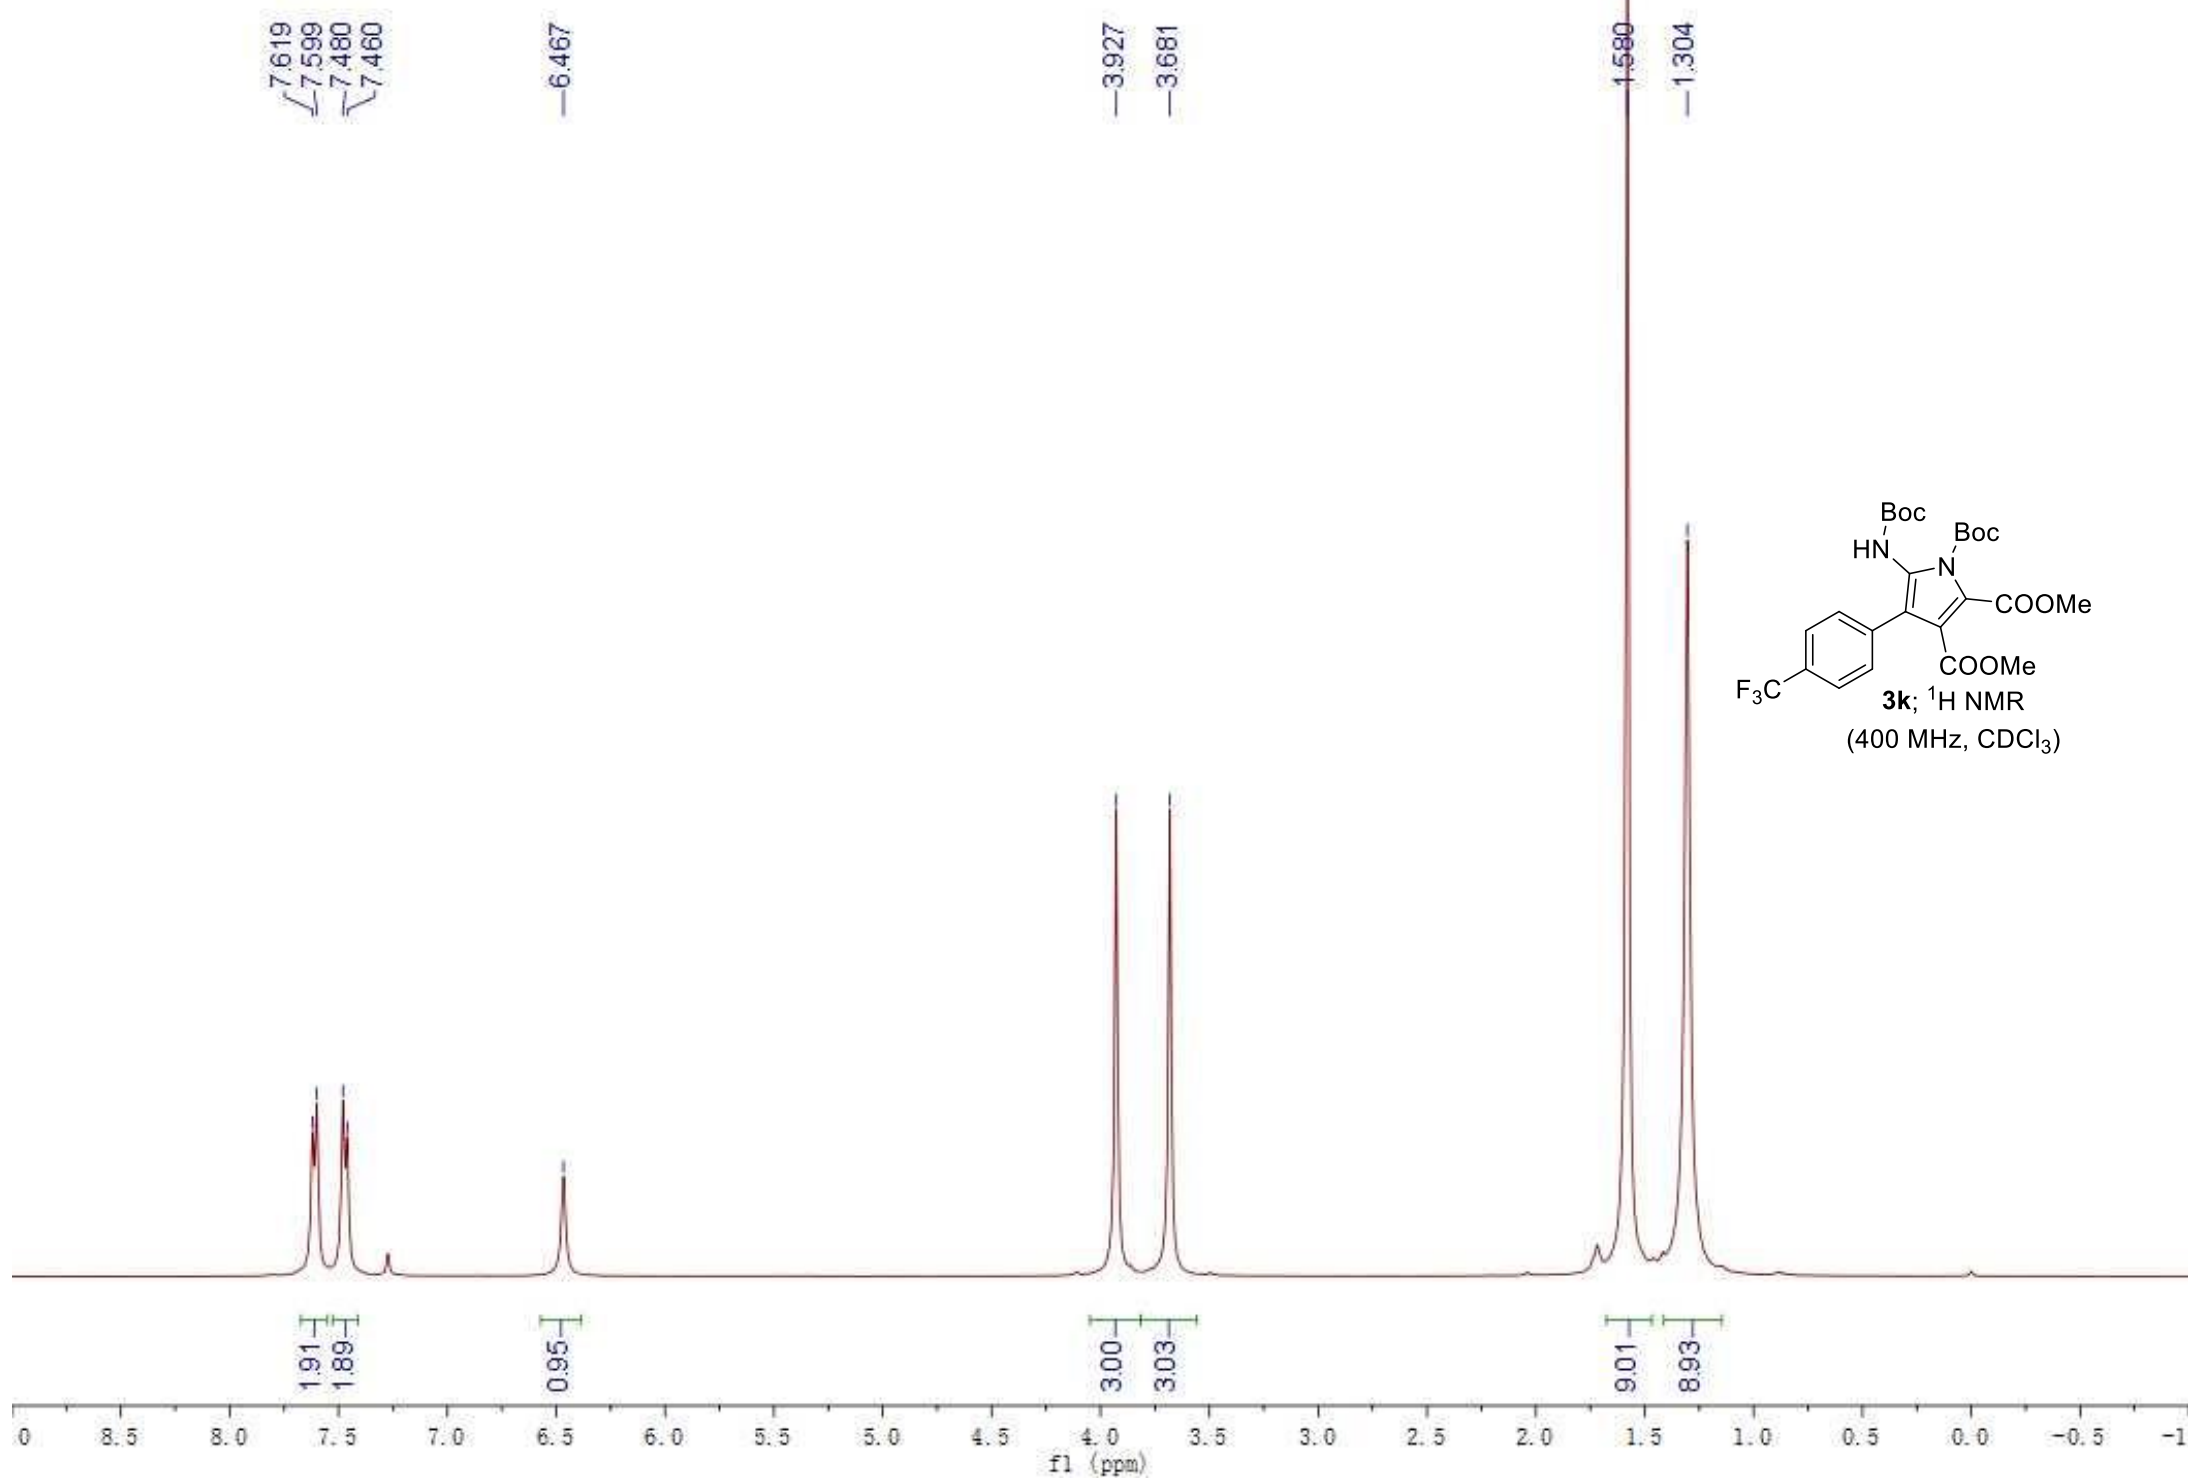

lj-zzw-1-115-1-re2.2.1.1r

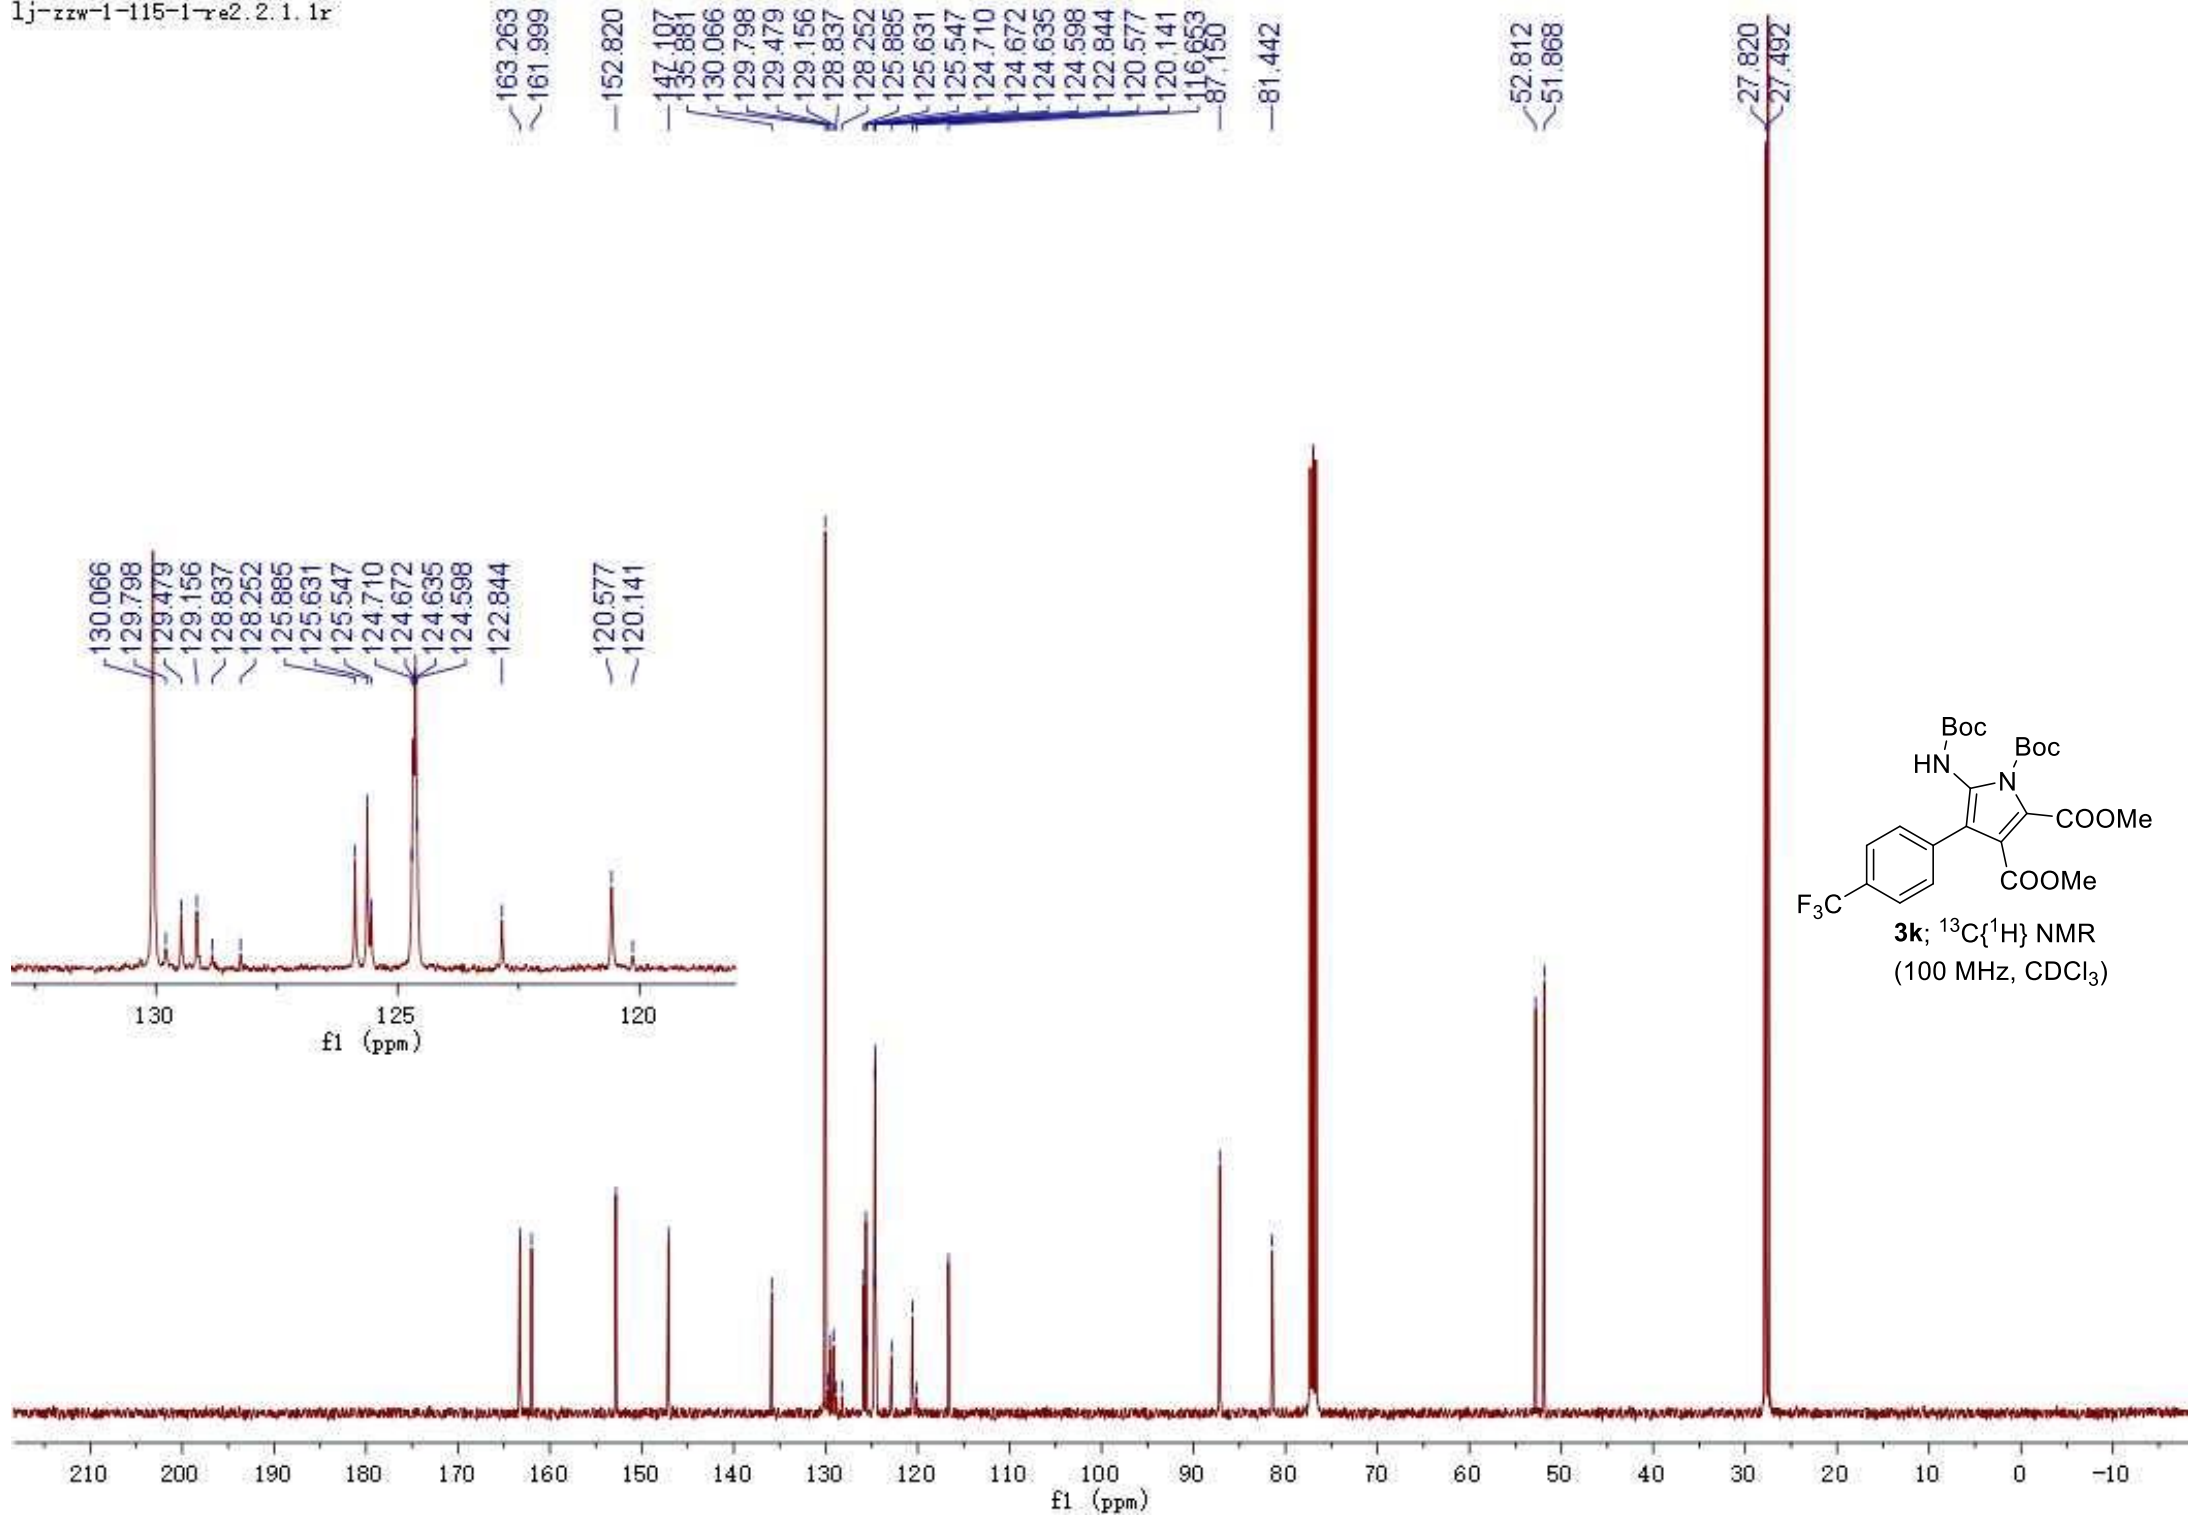

lj-zzw-1-115-1f.1.1.1r

62.563

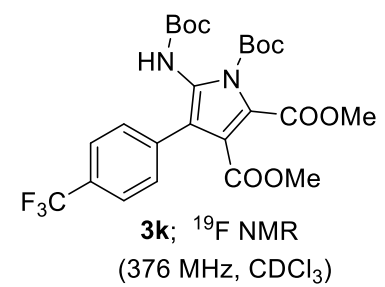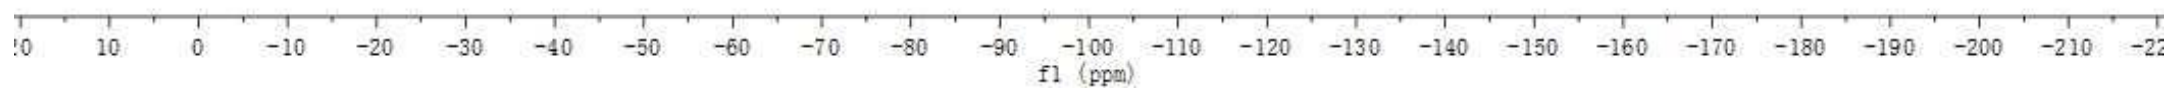

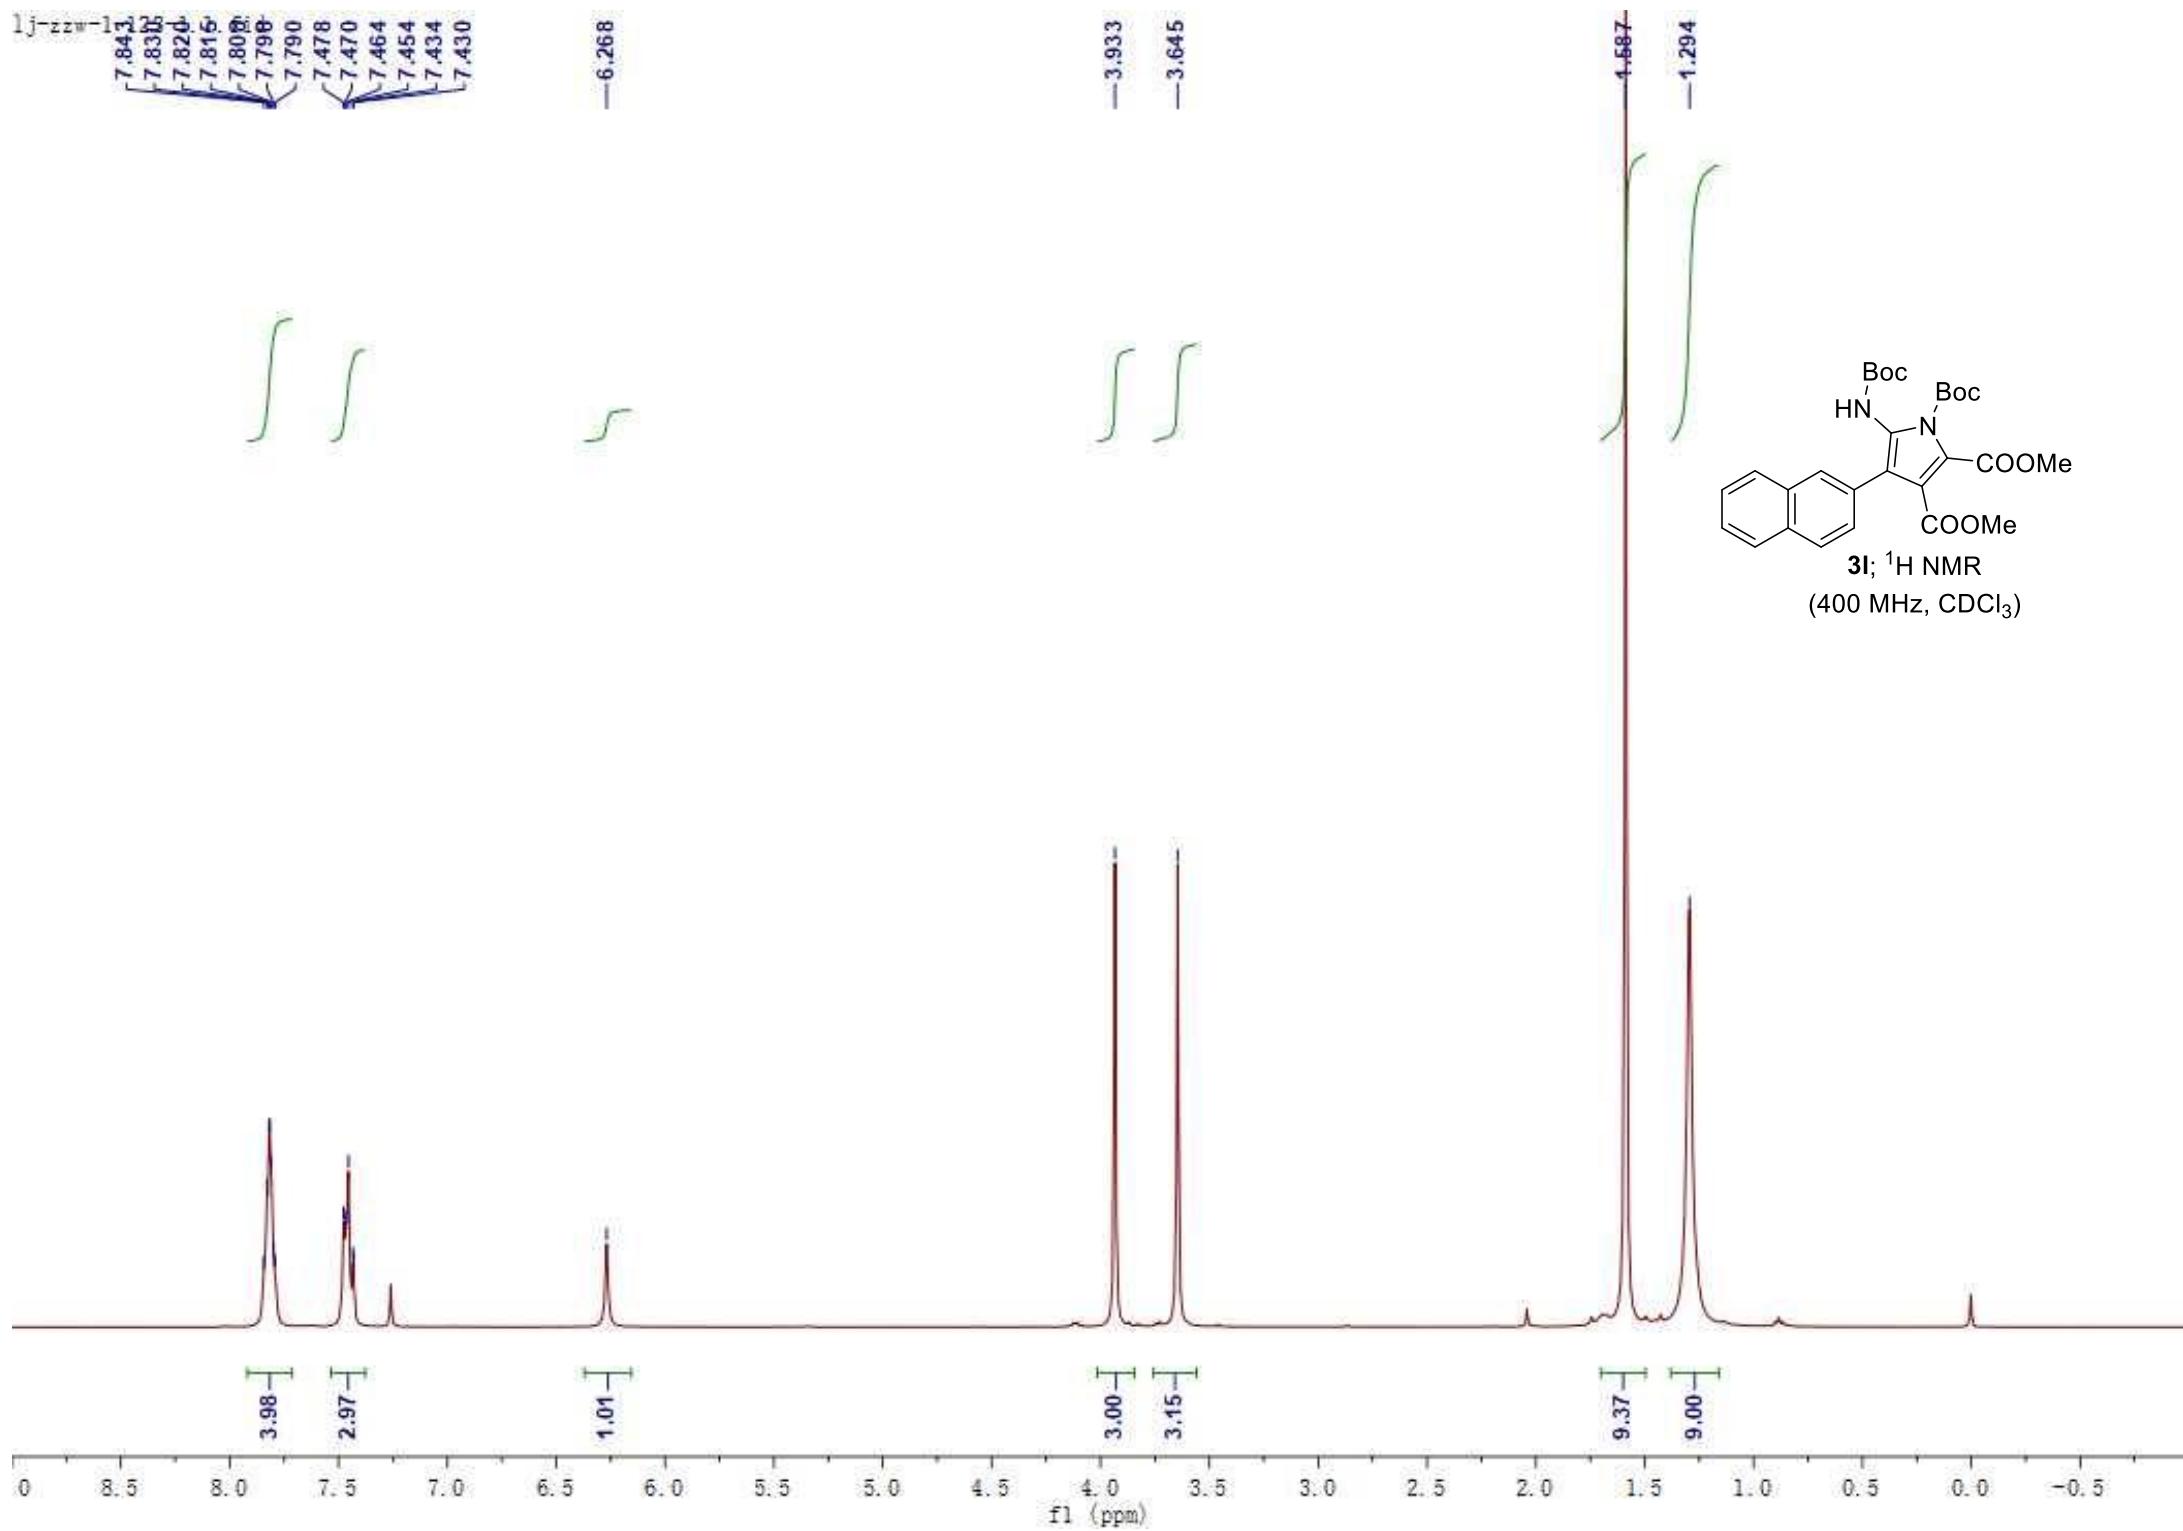

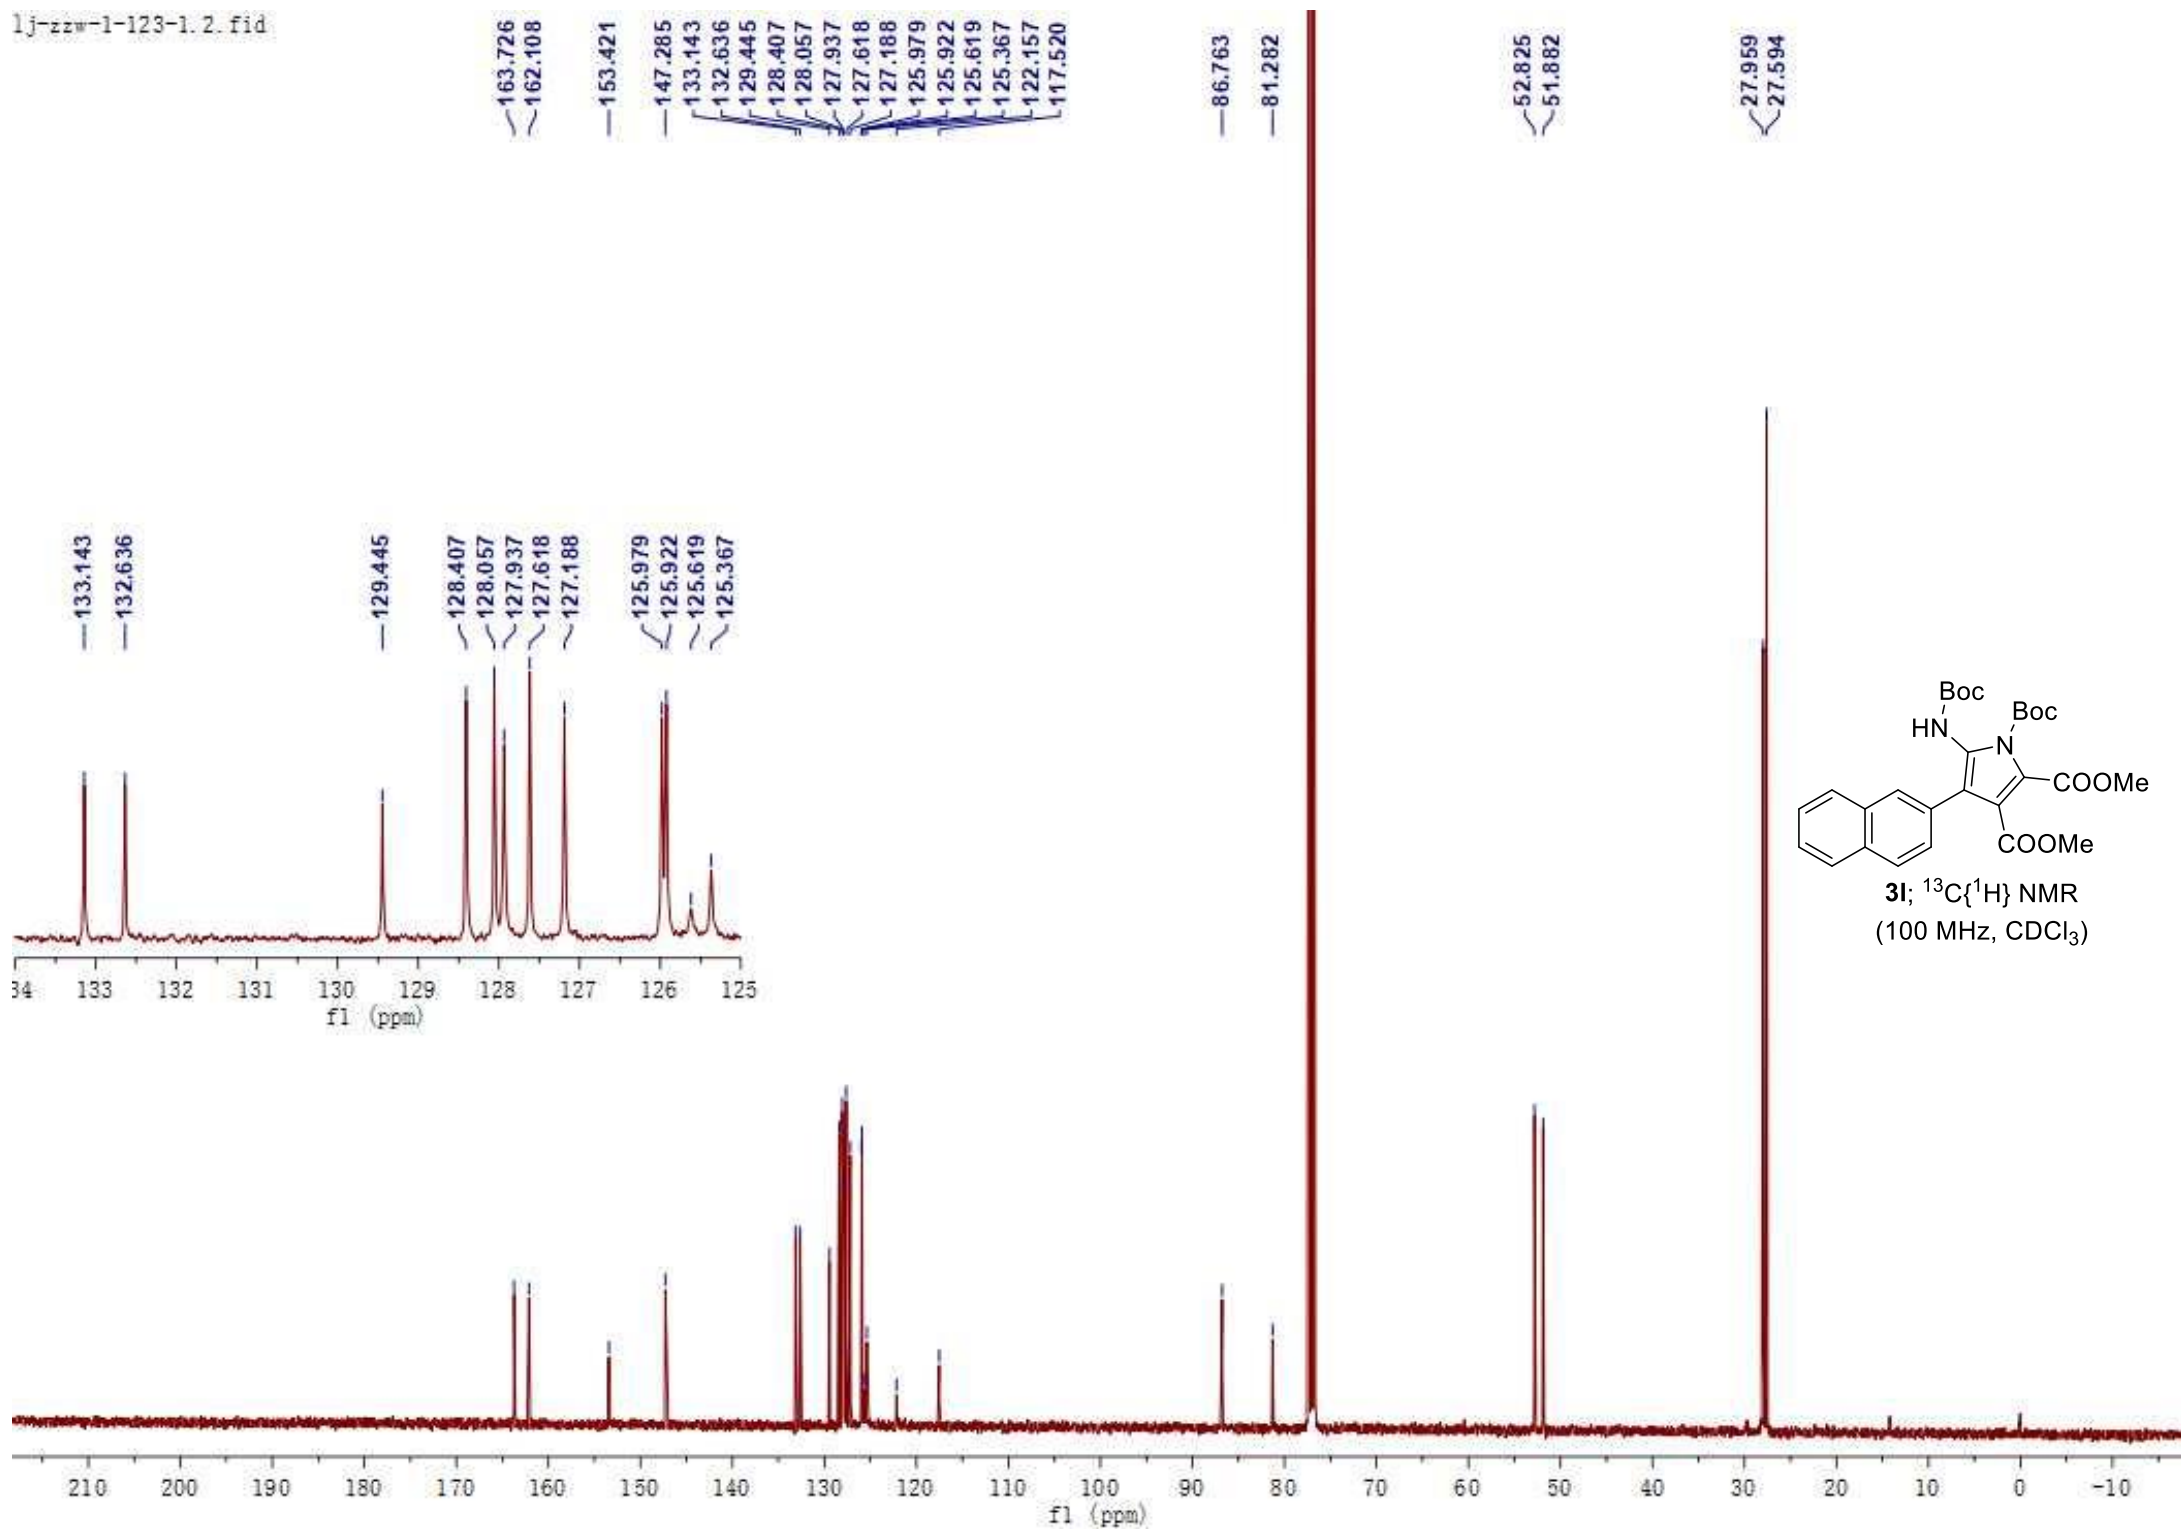

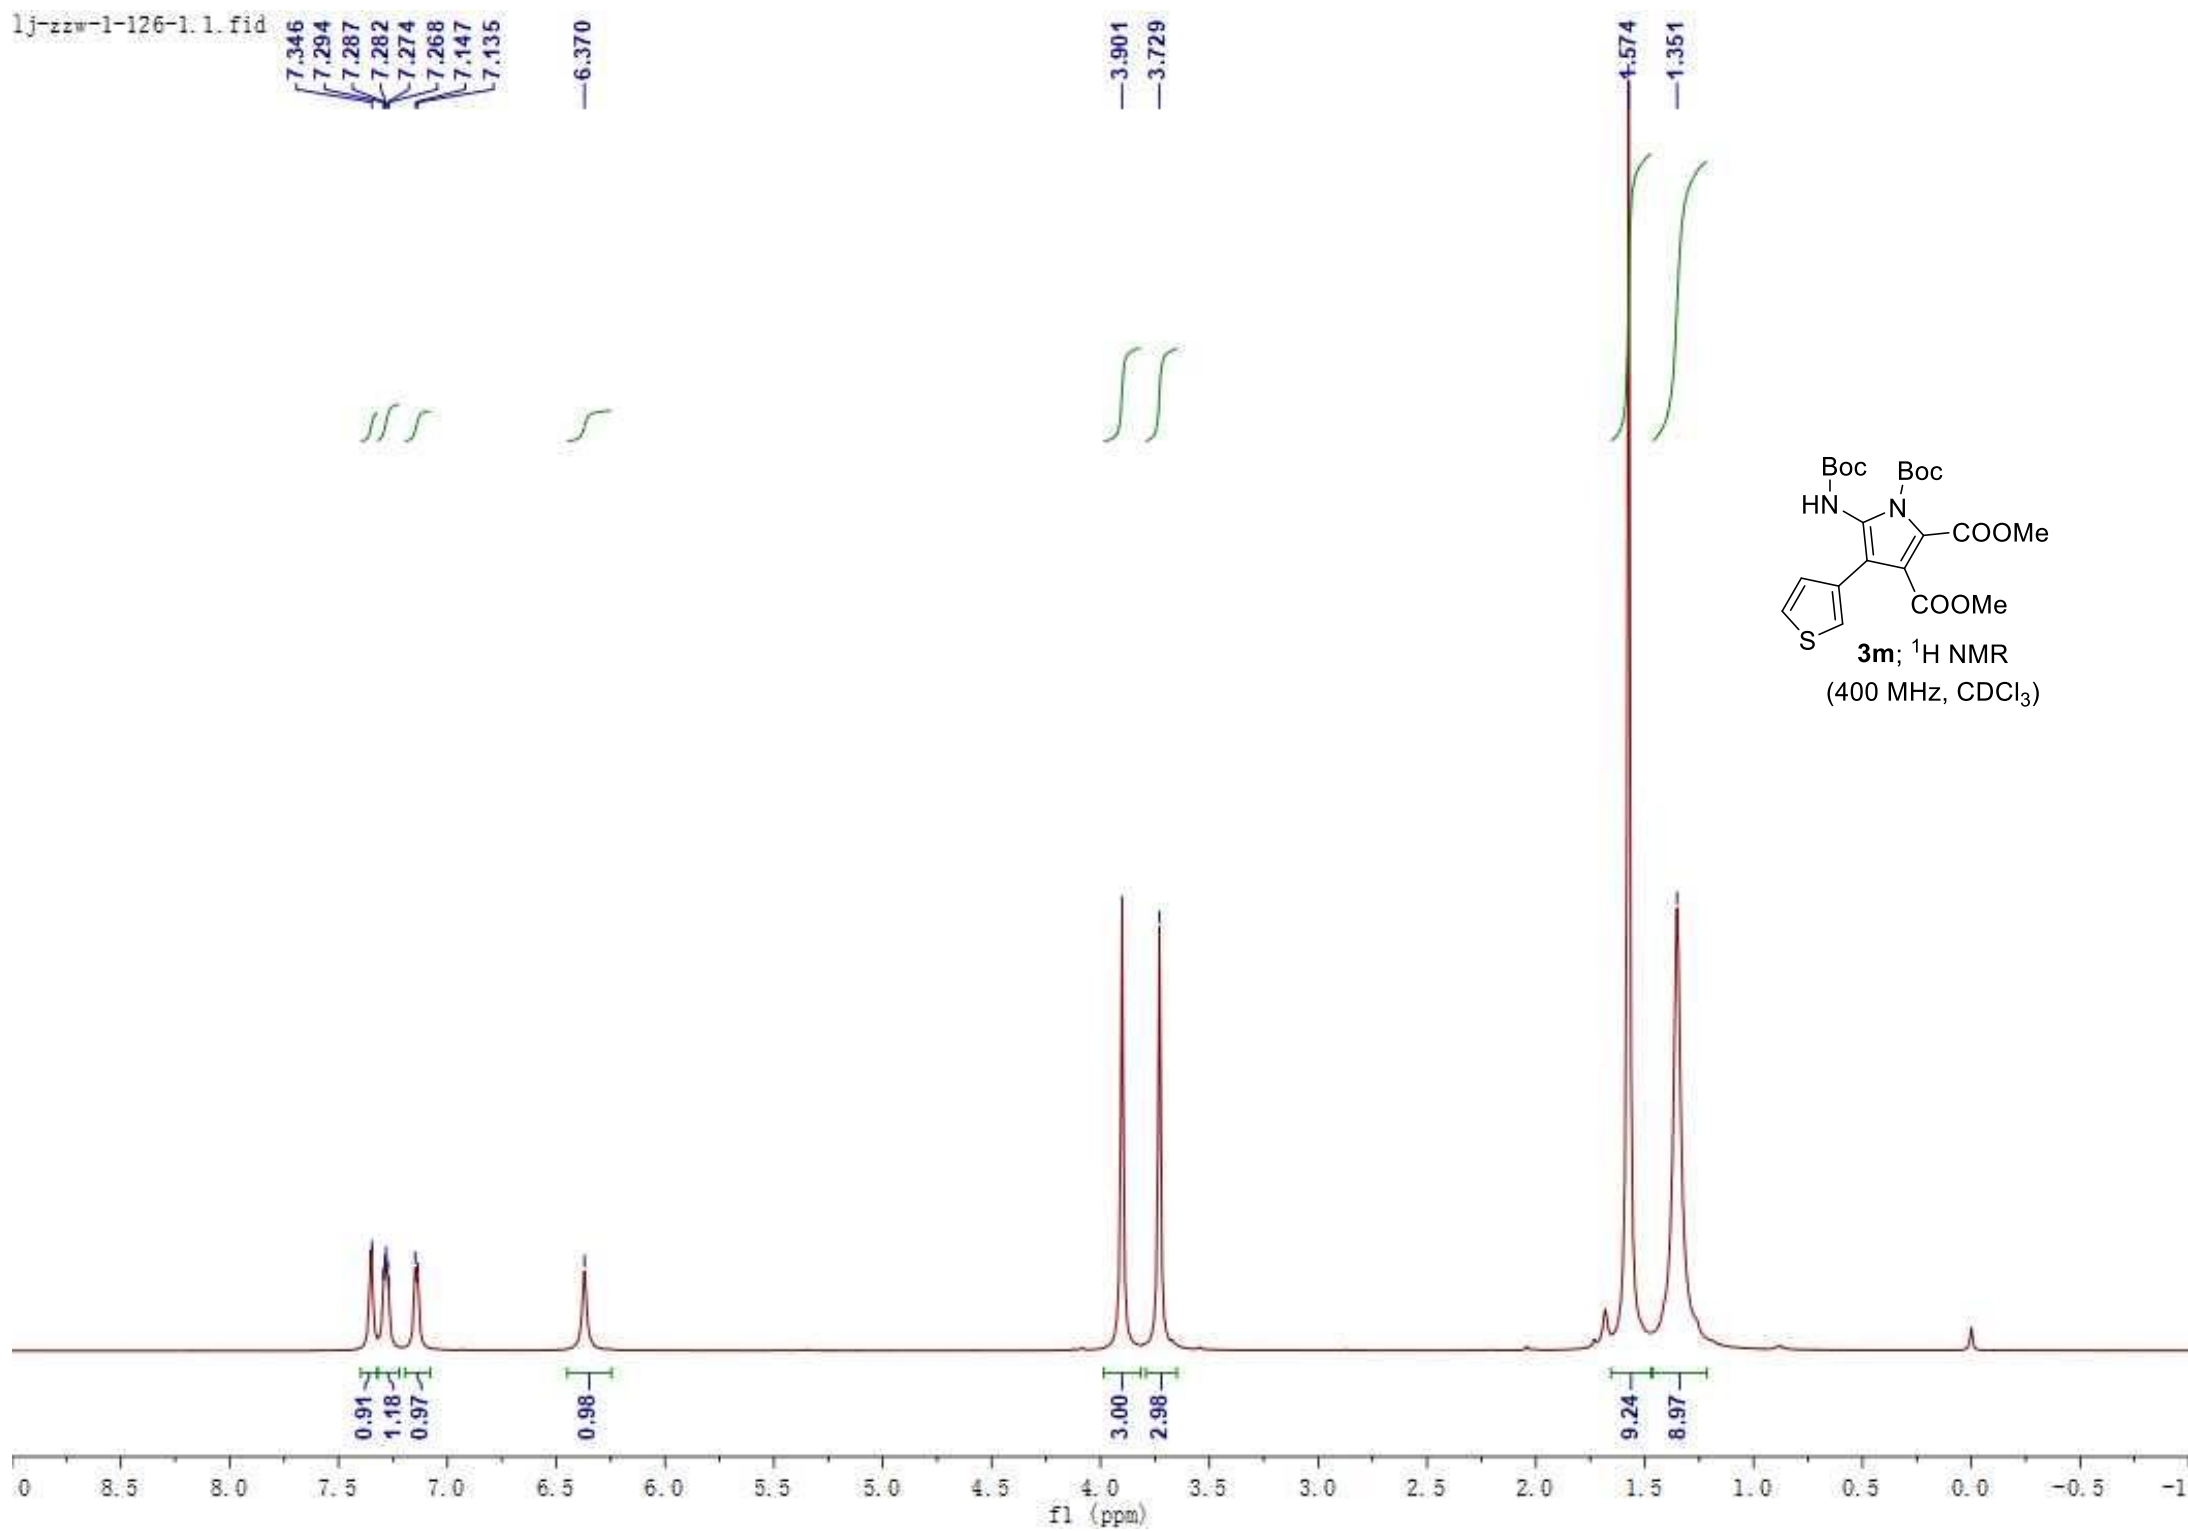

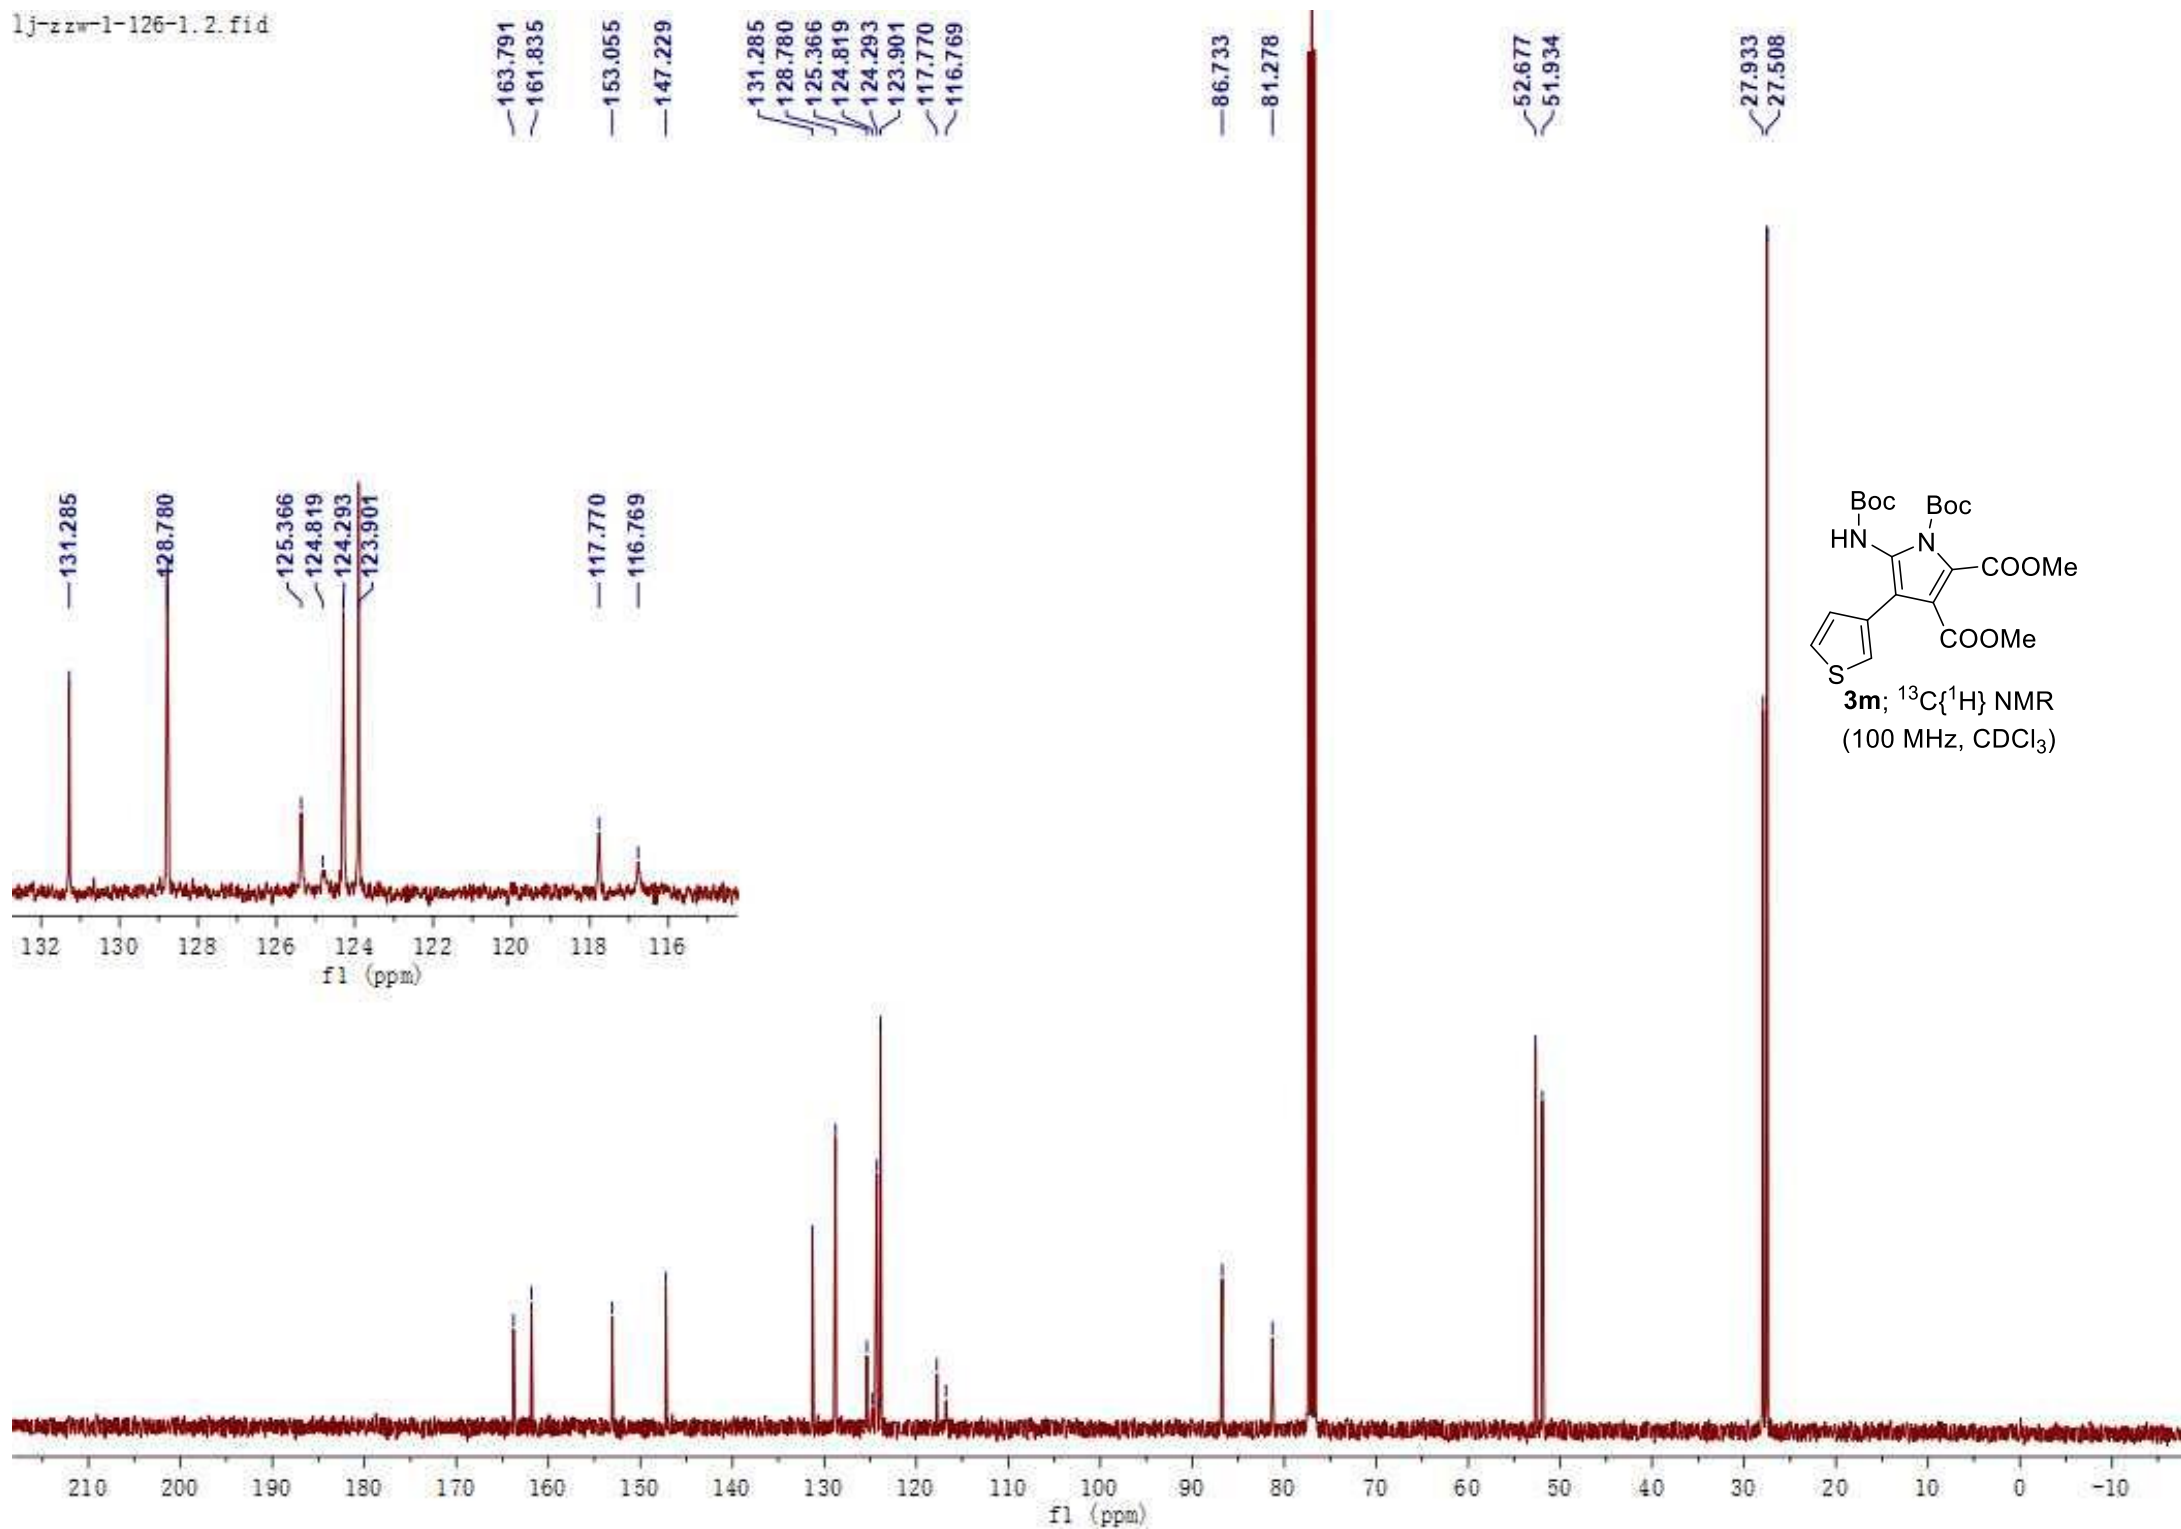



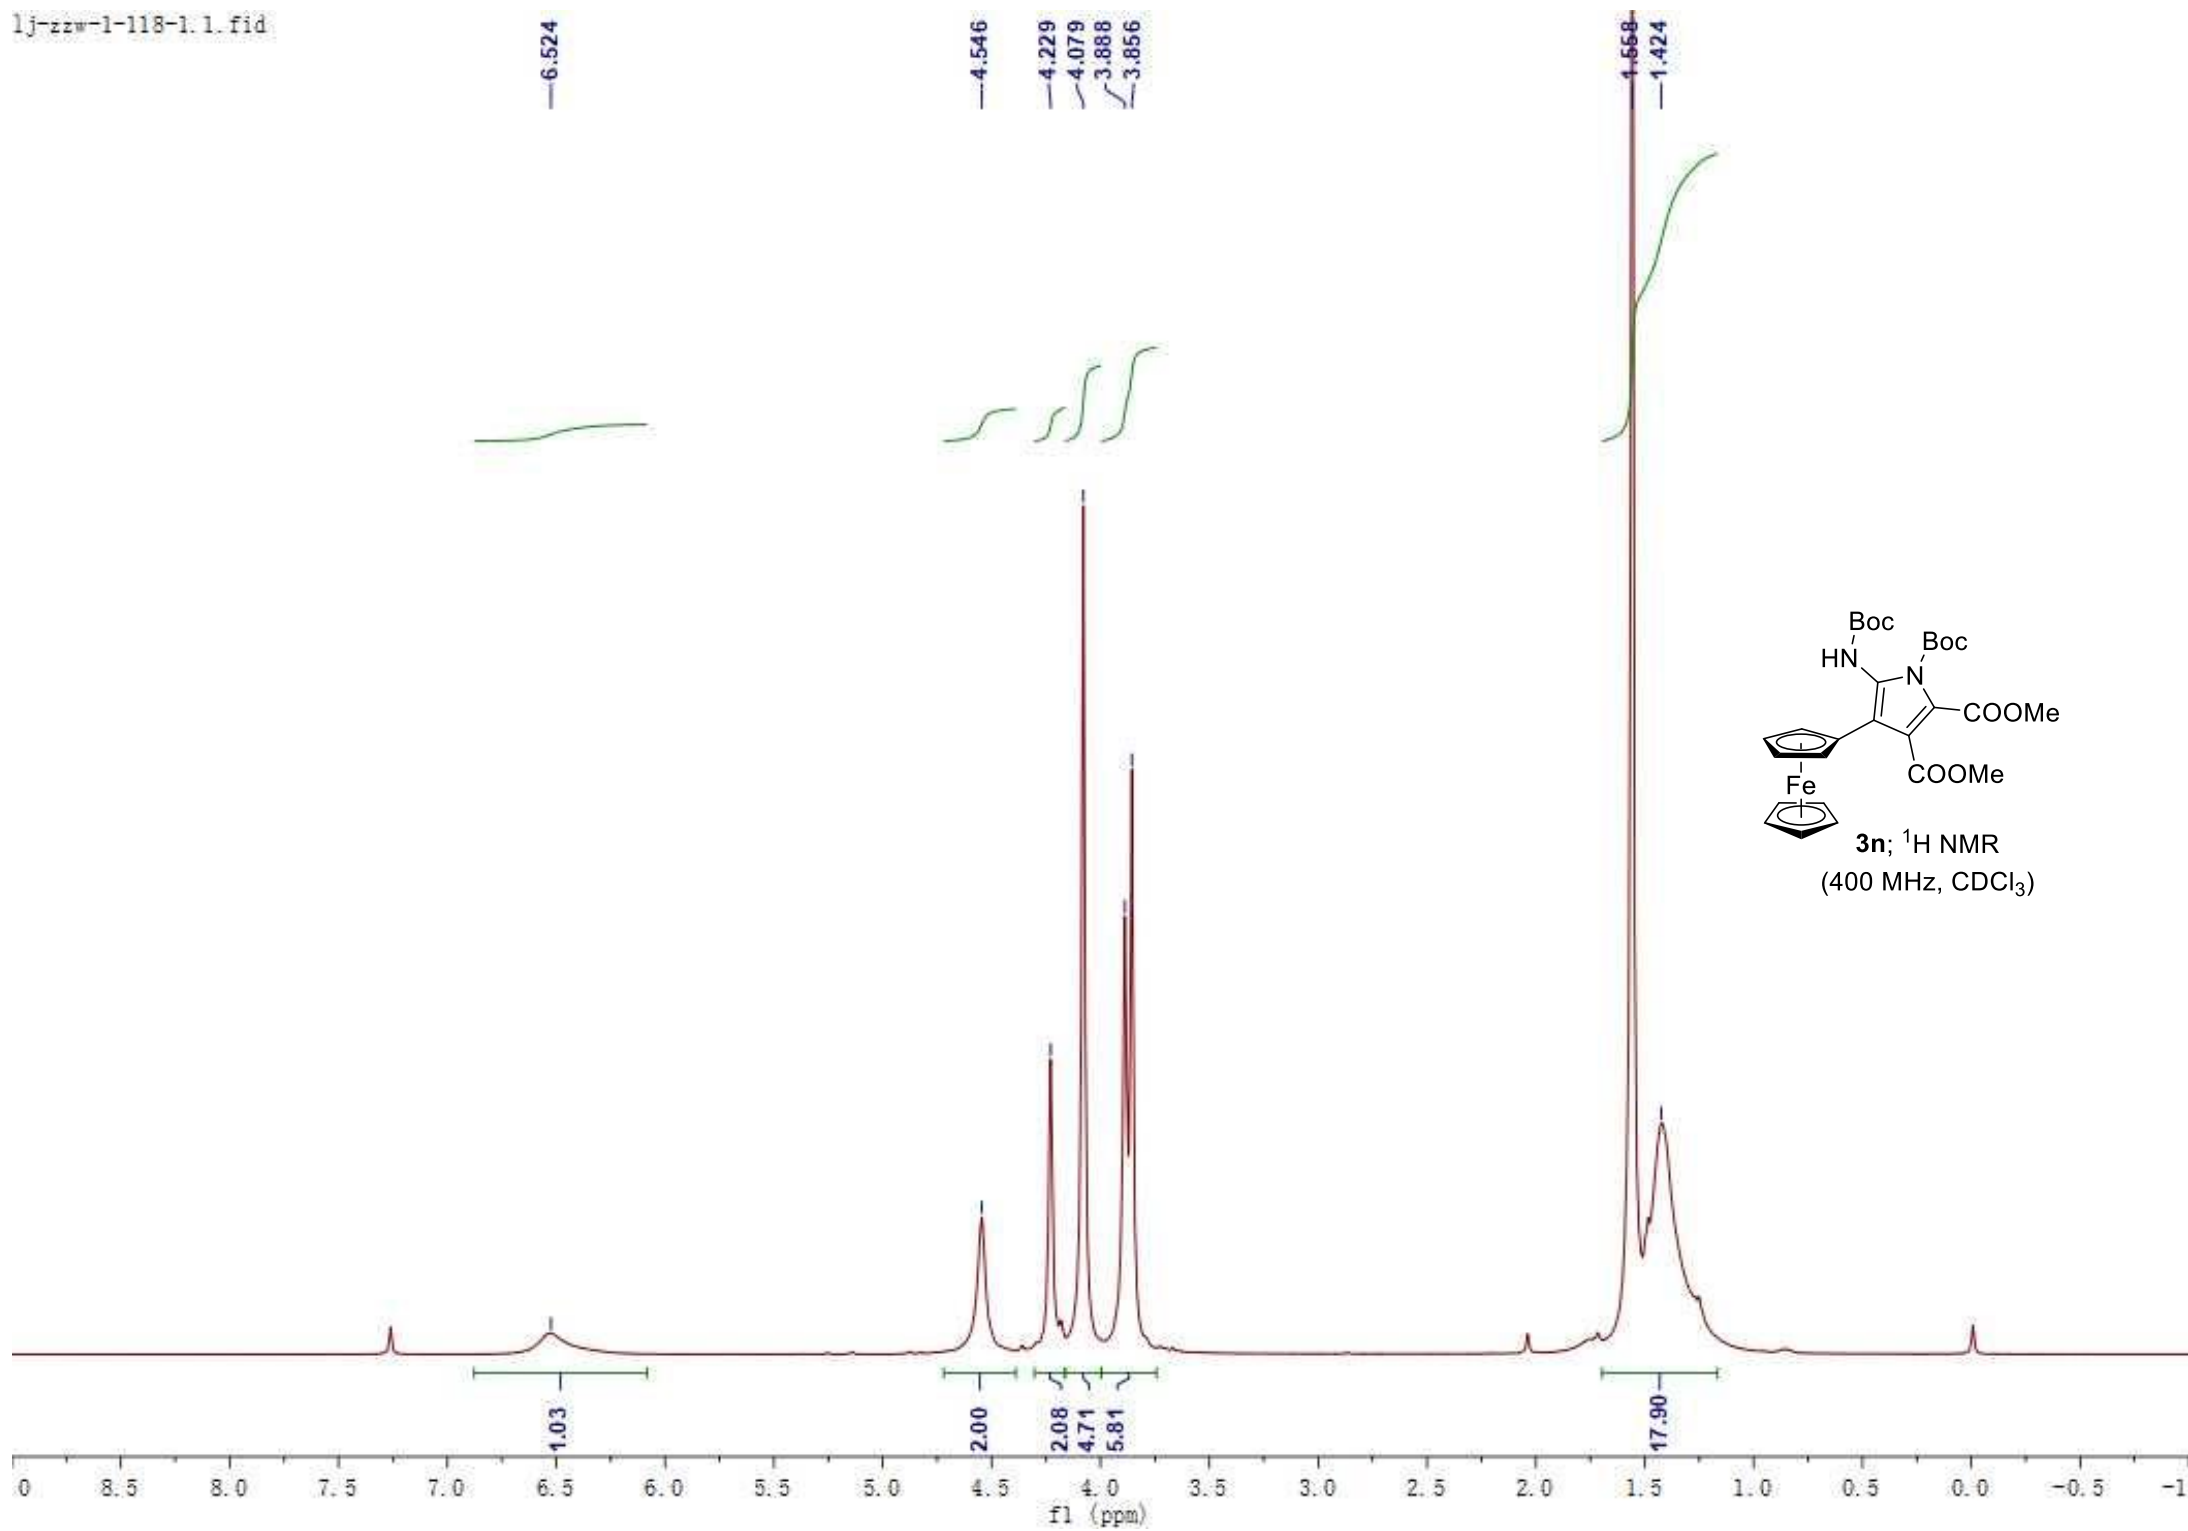

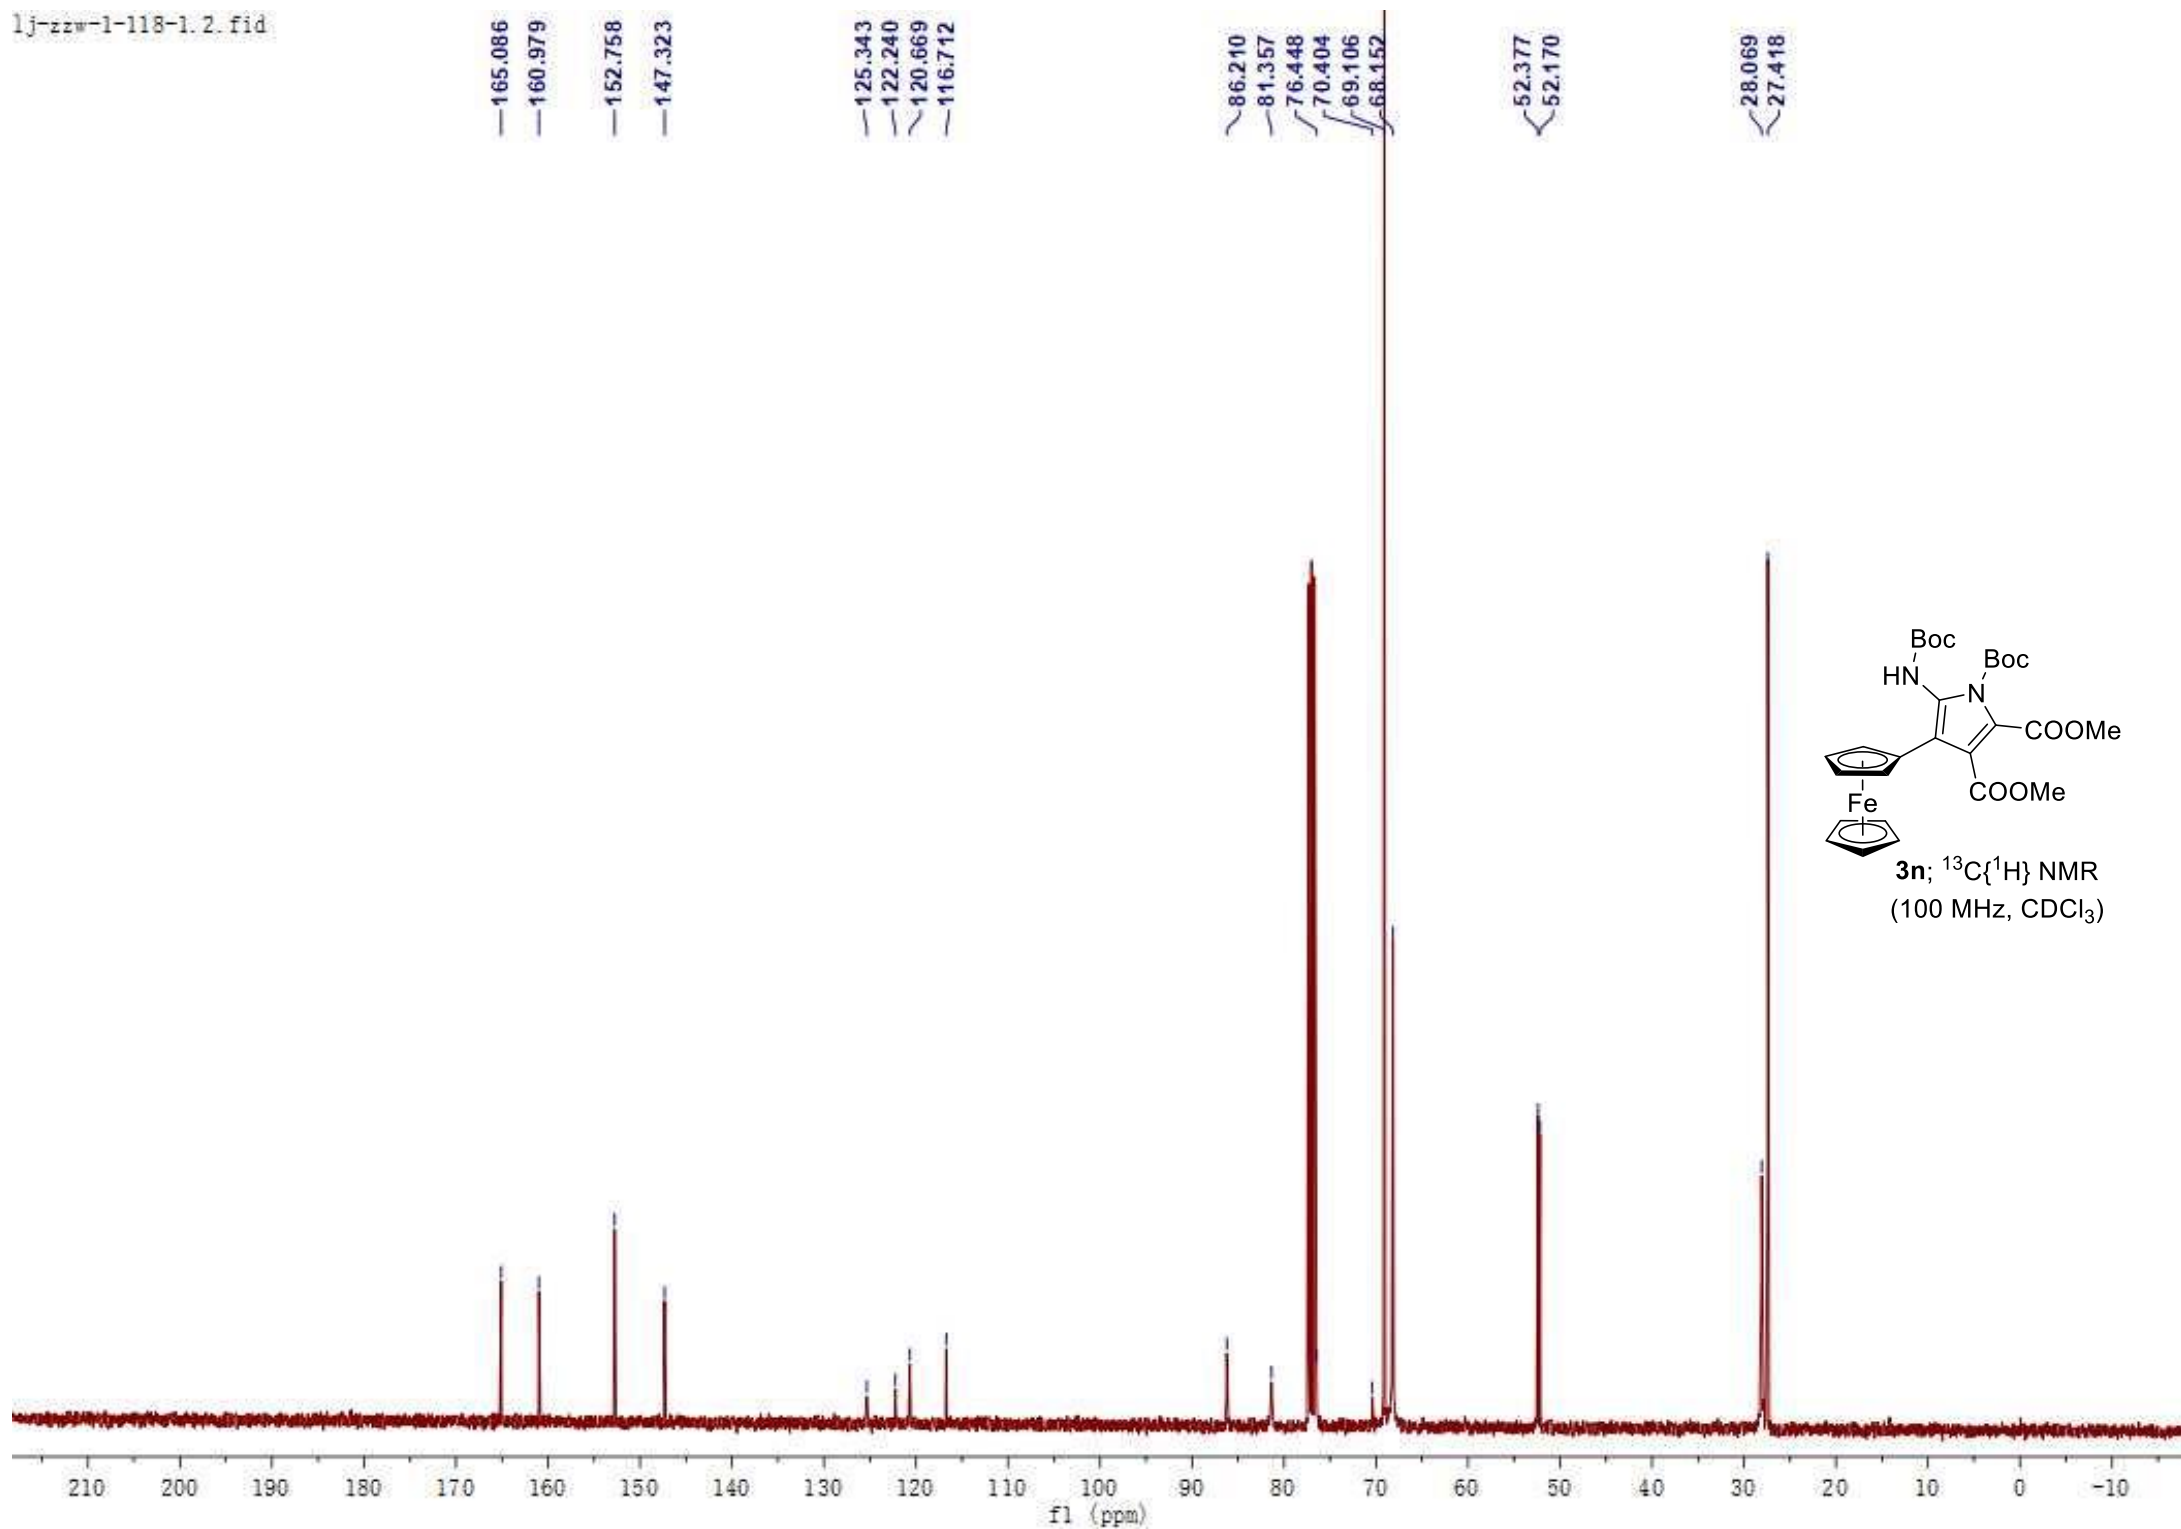

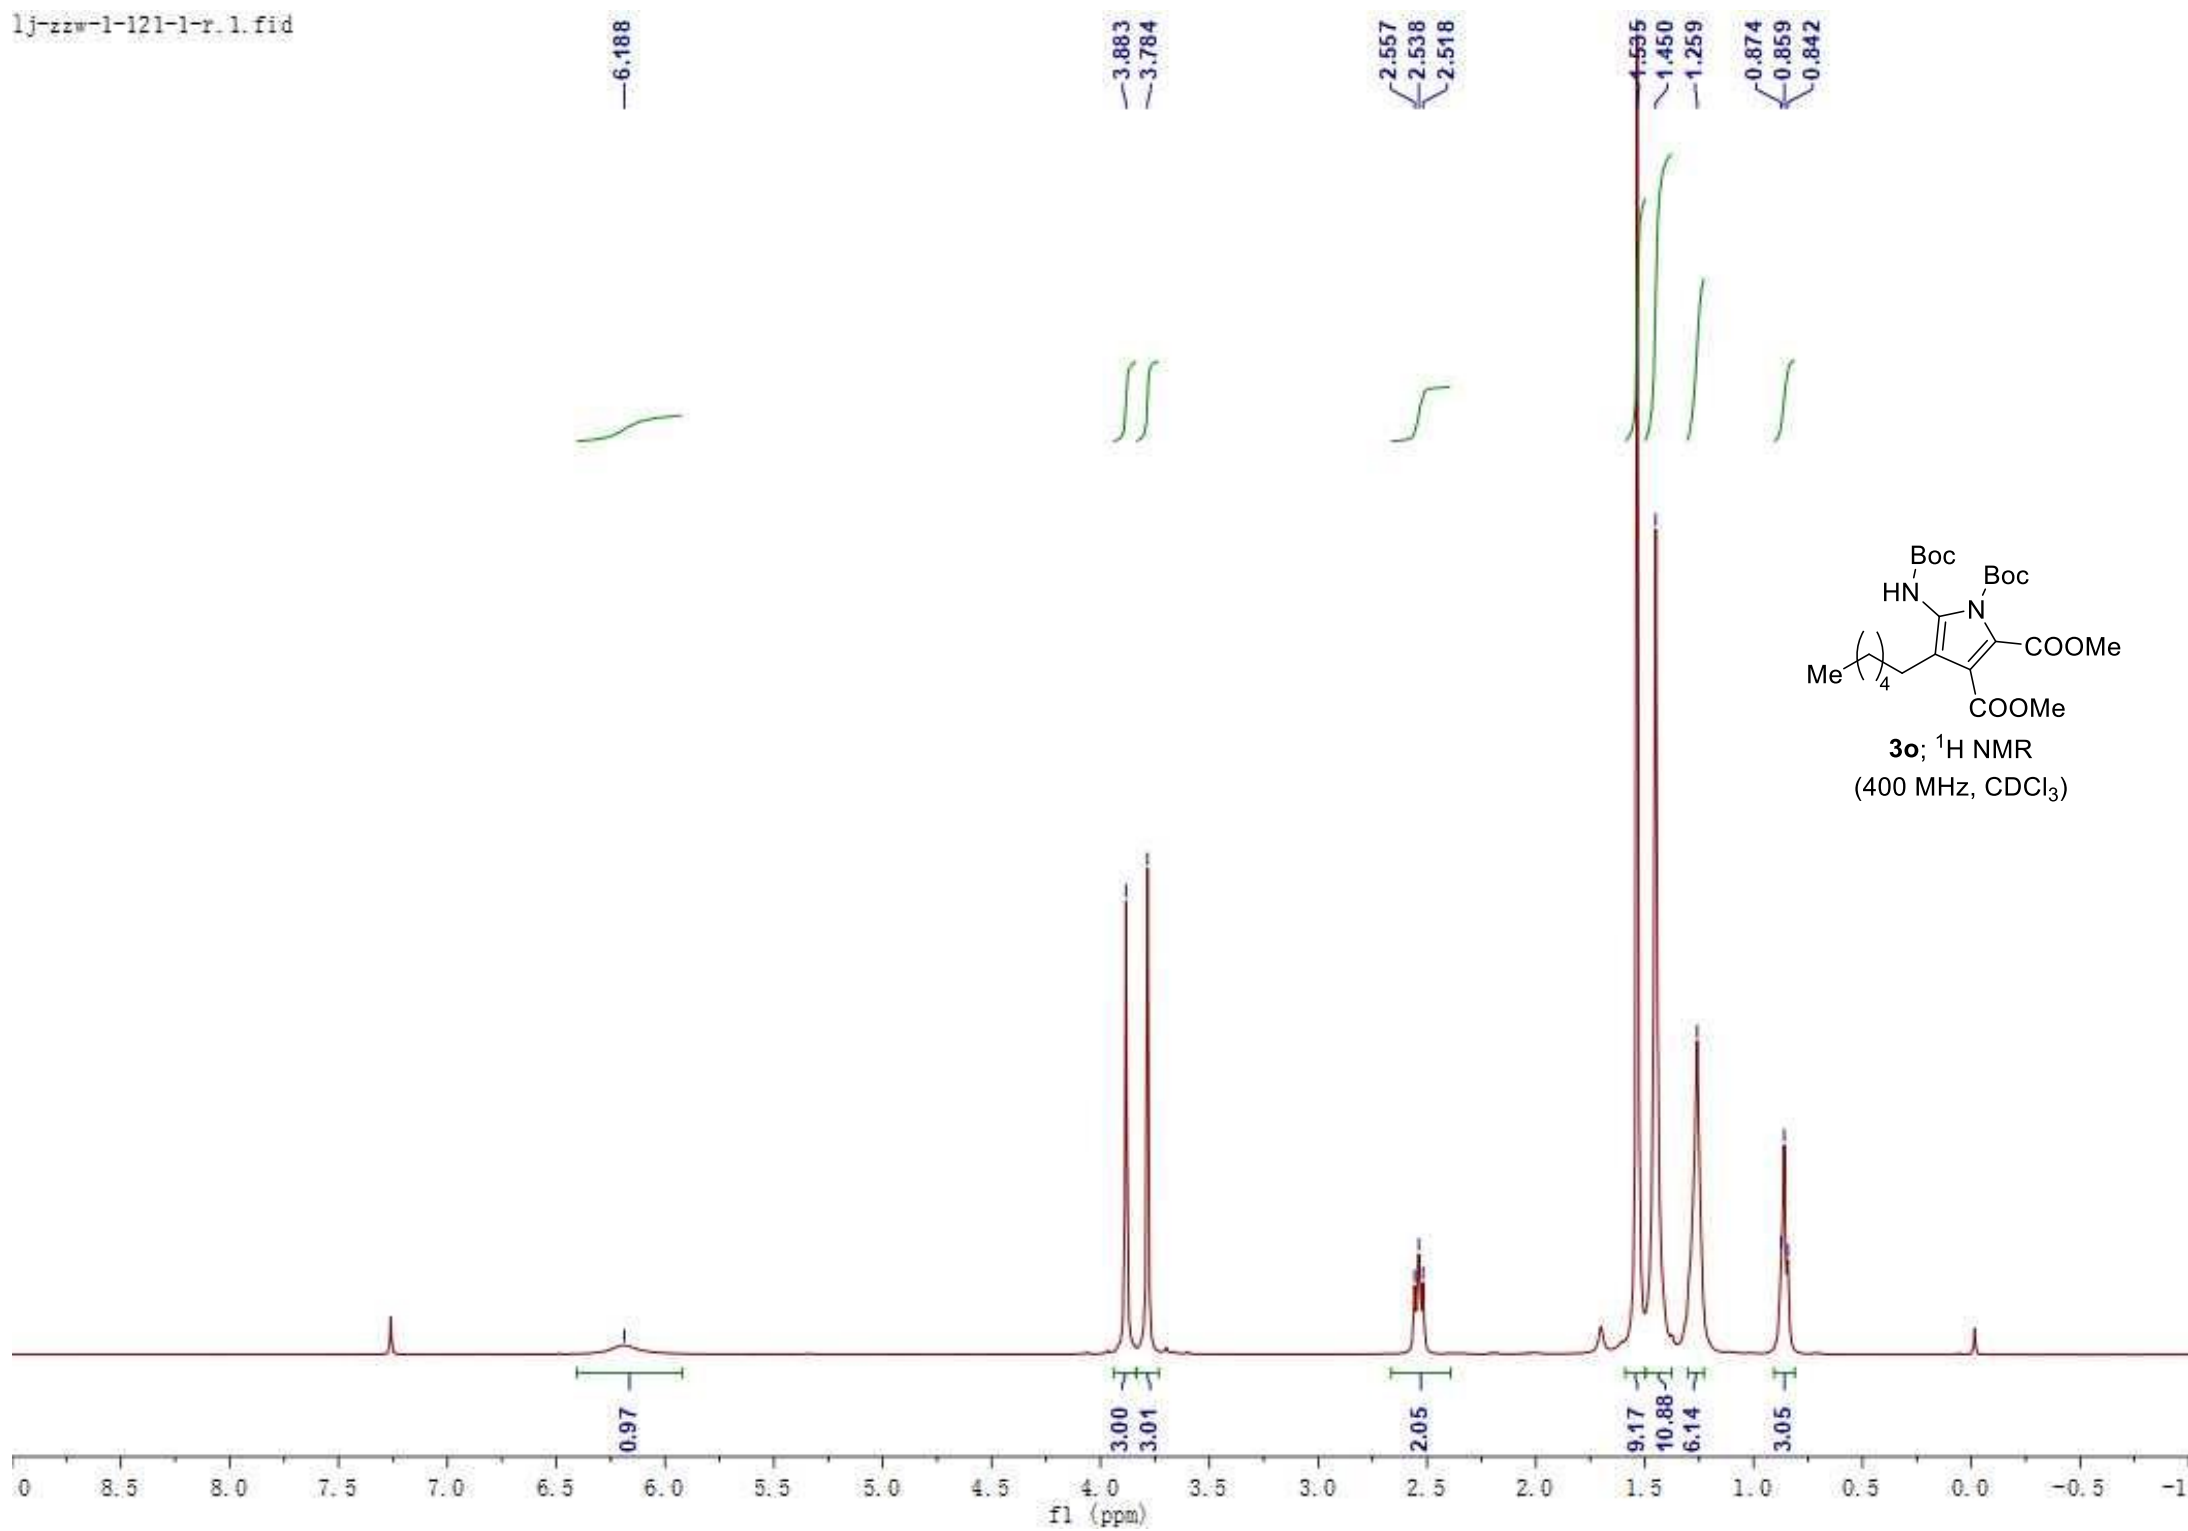

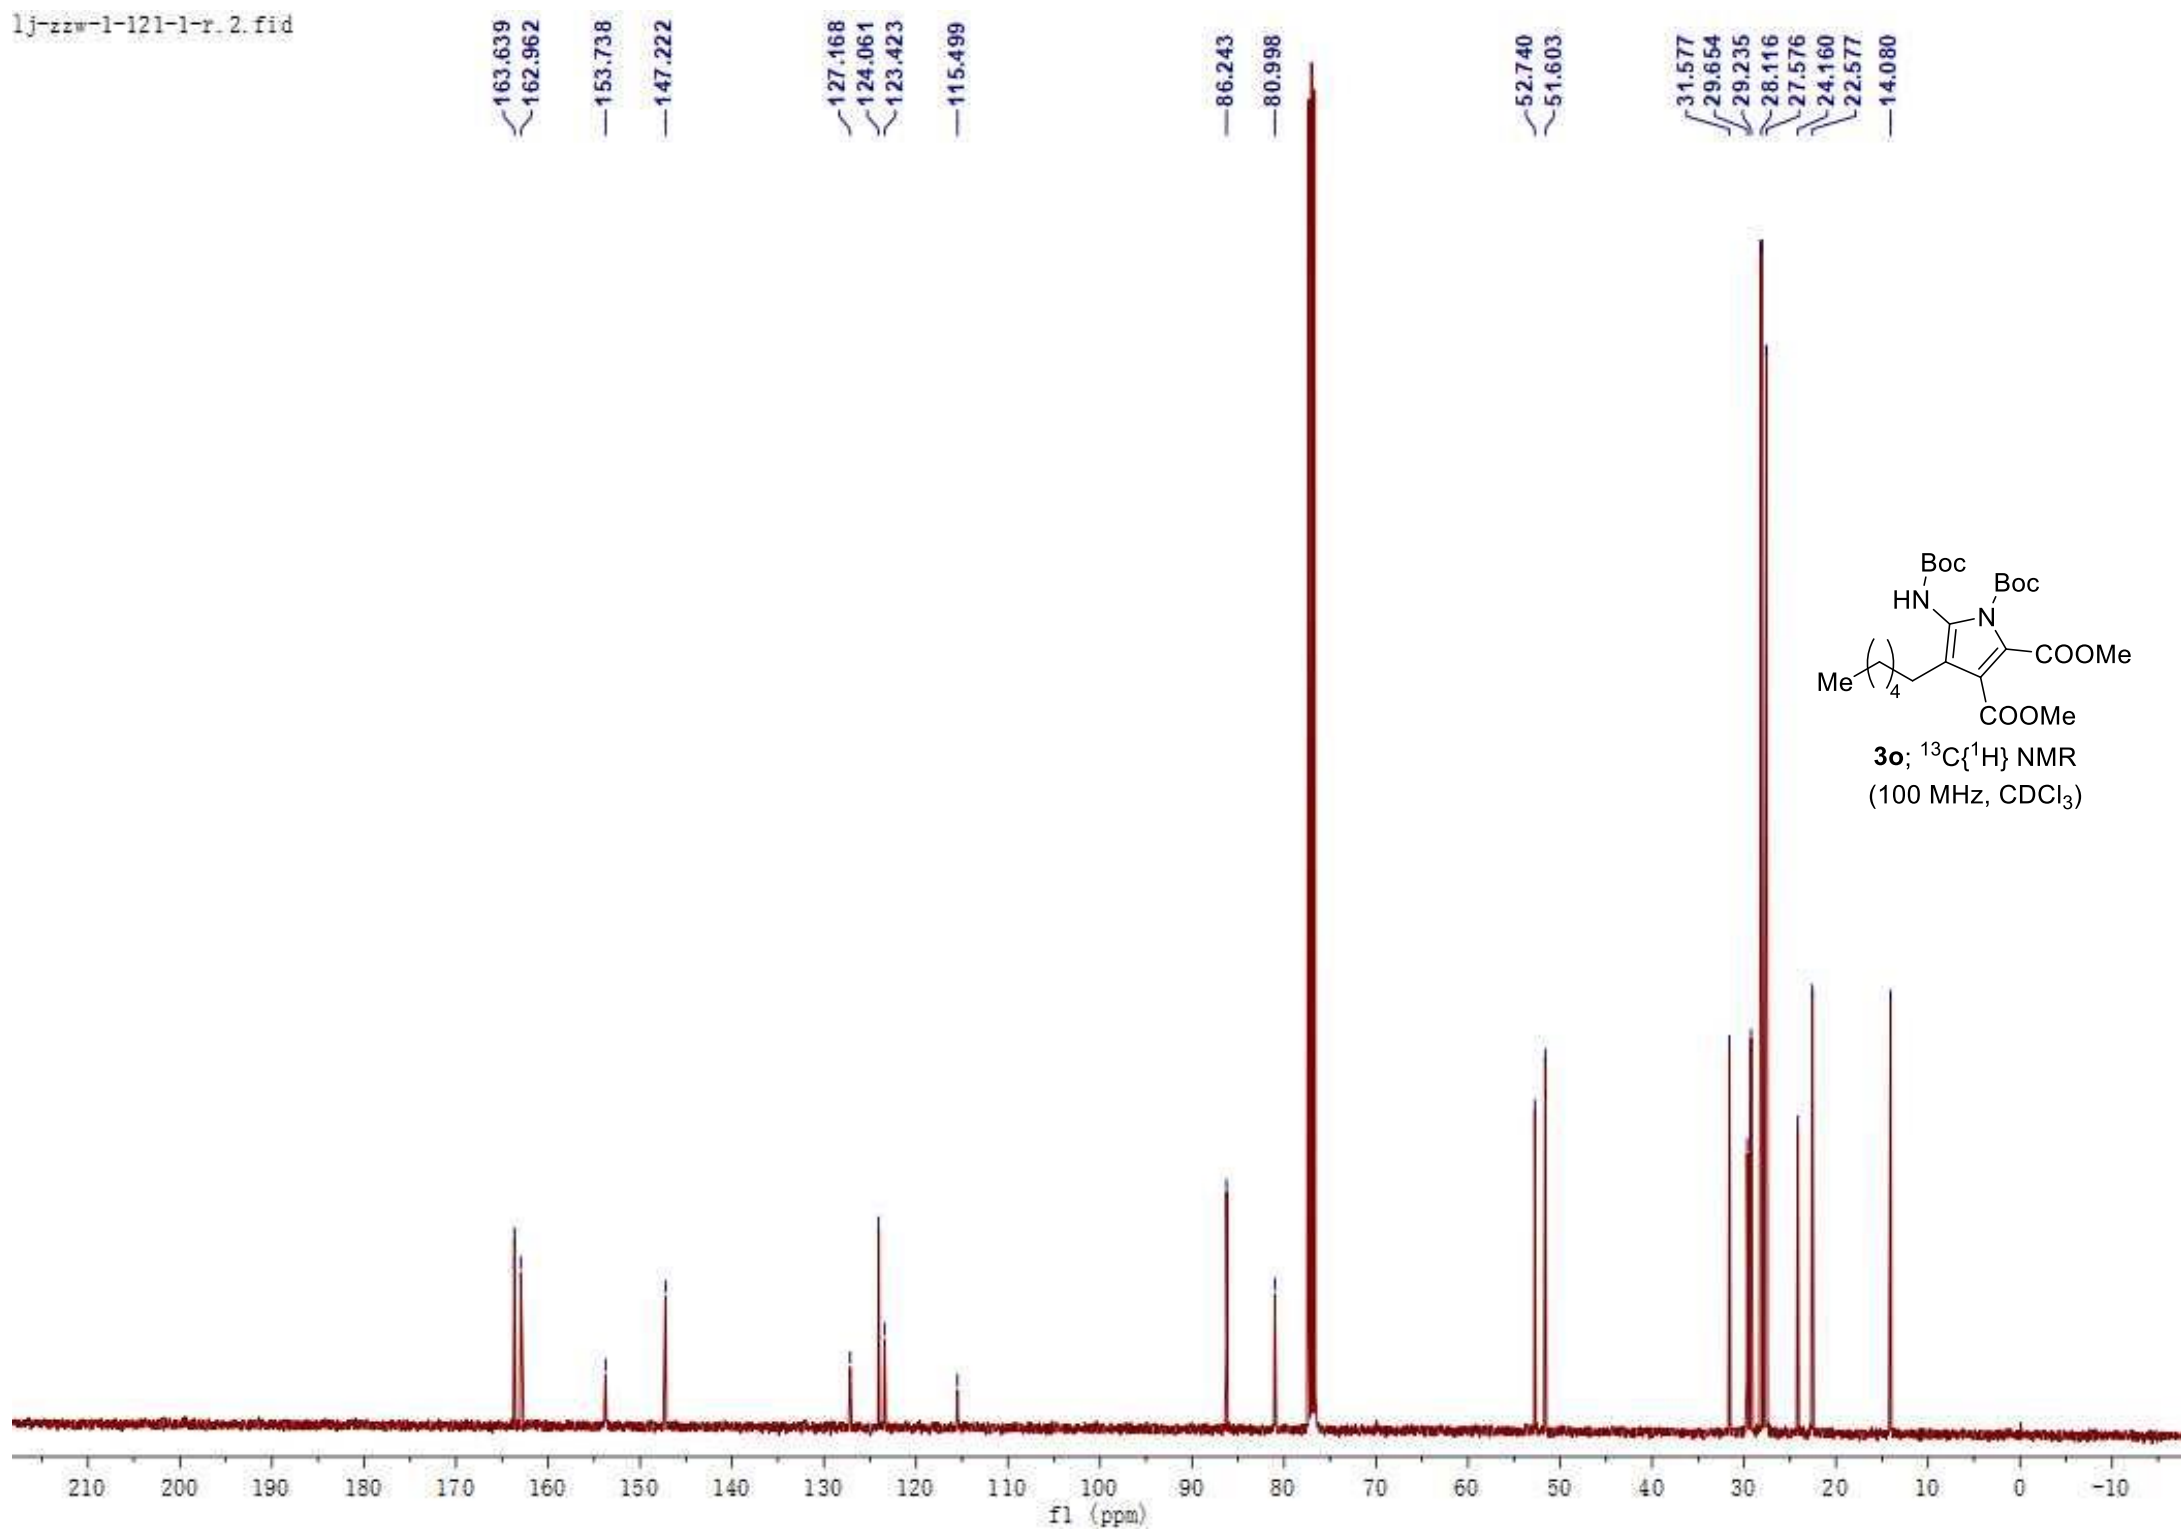

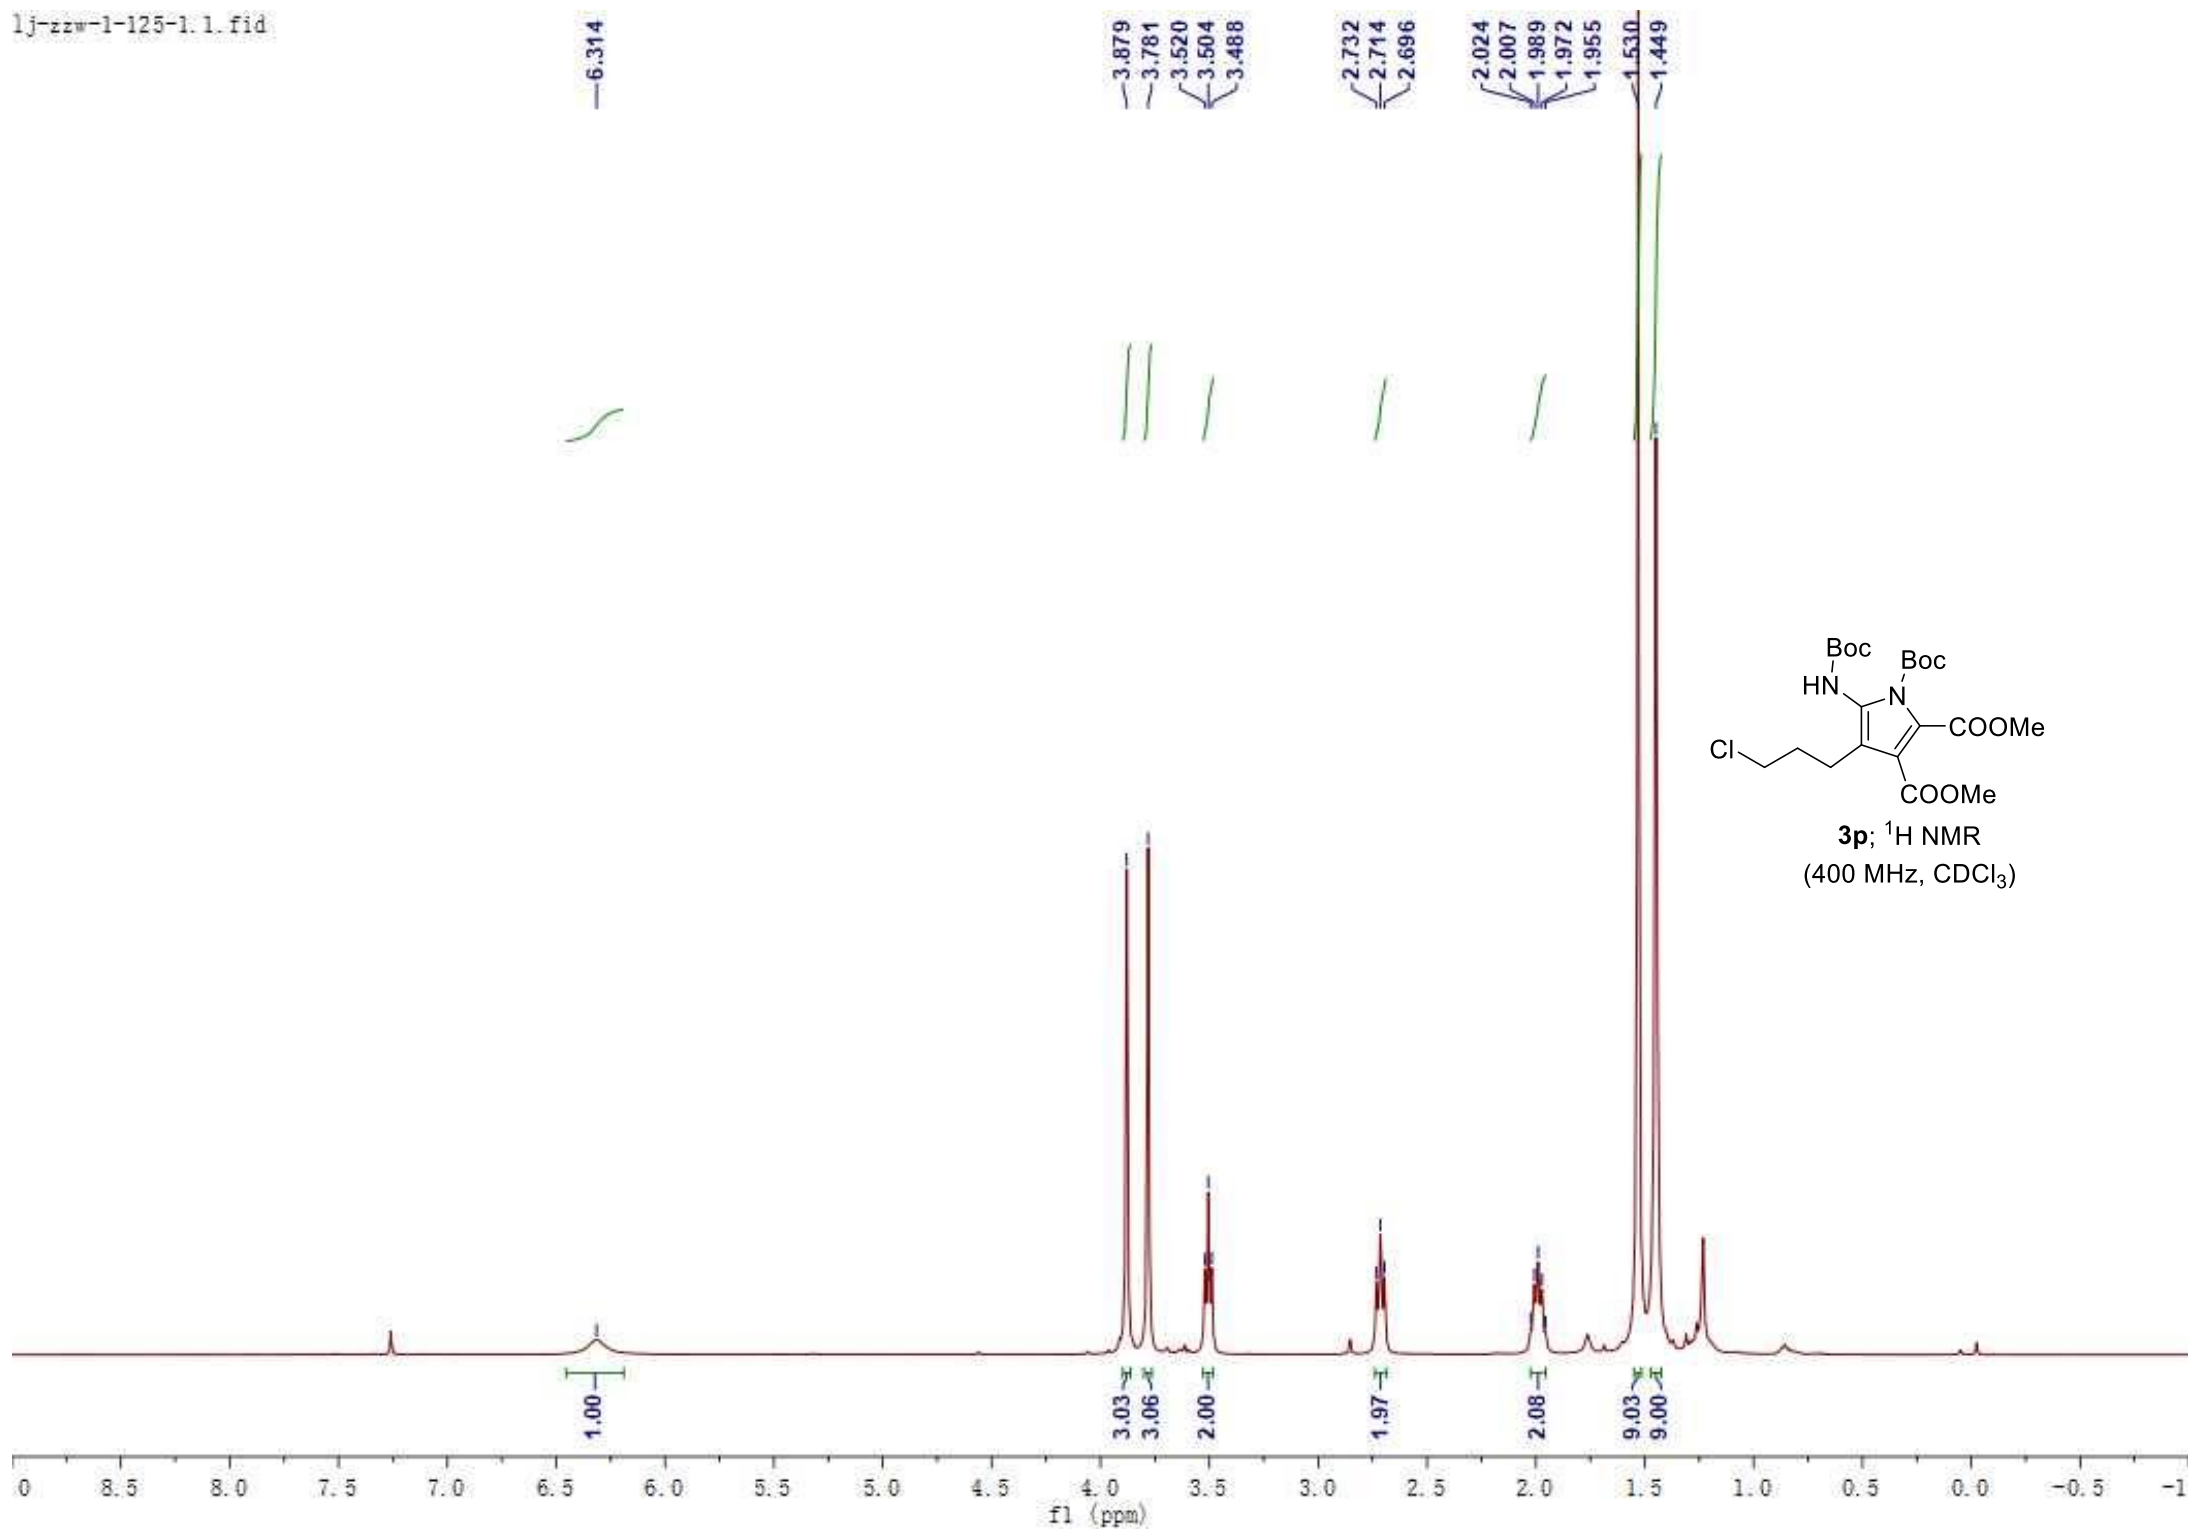

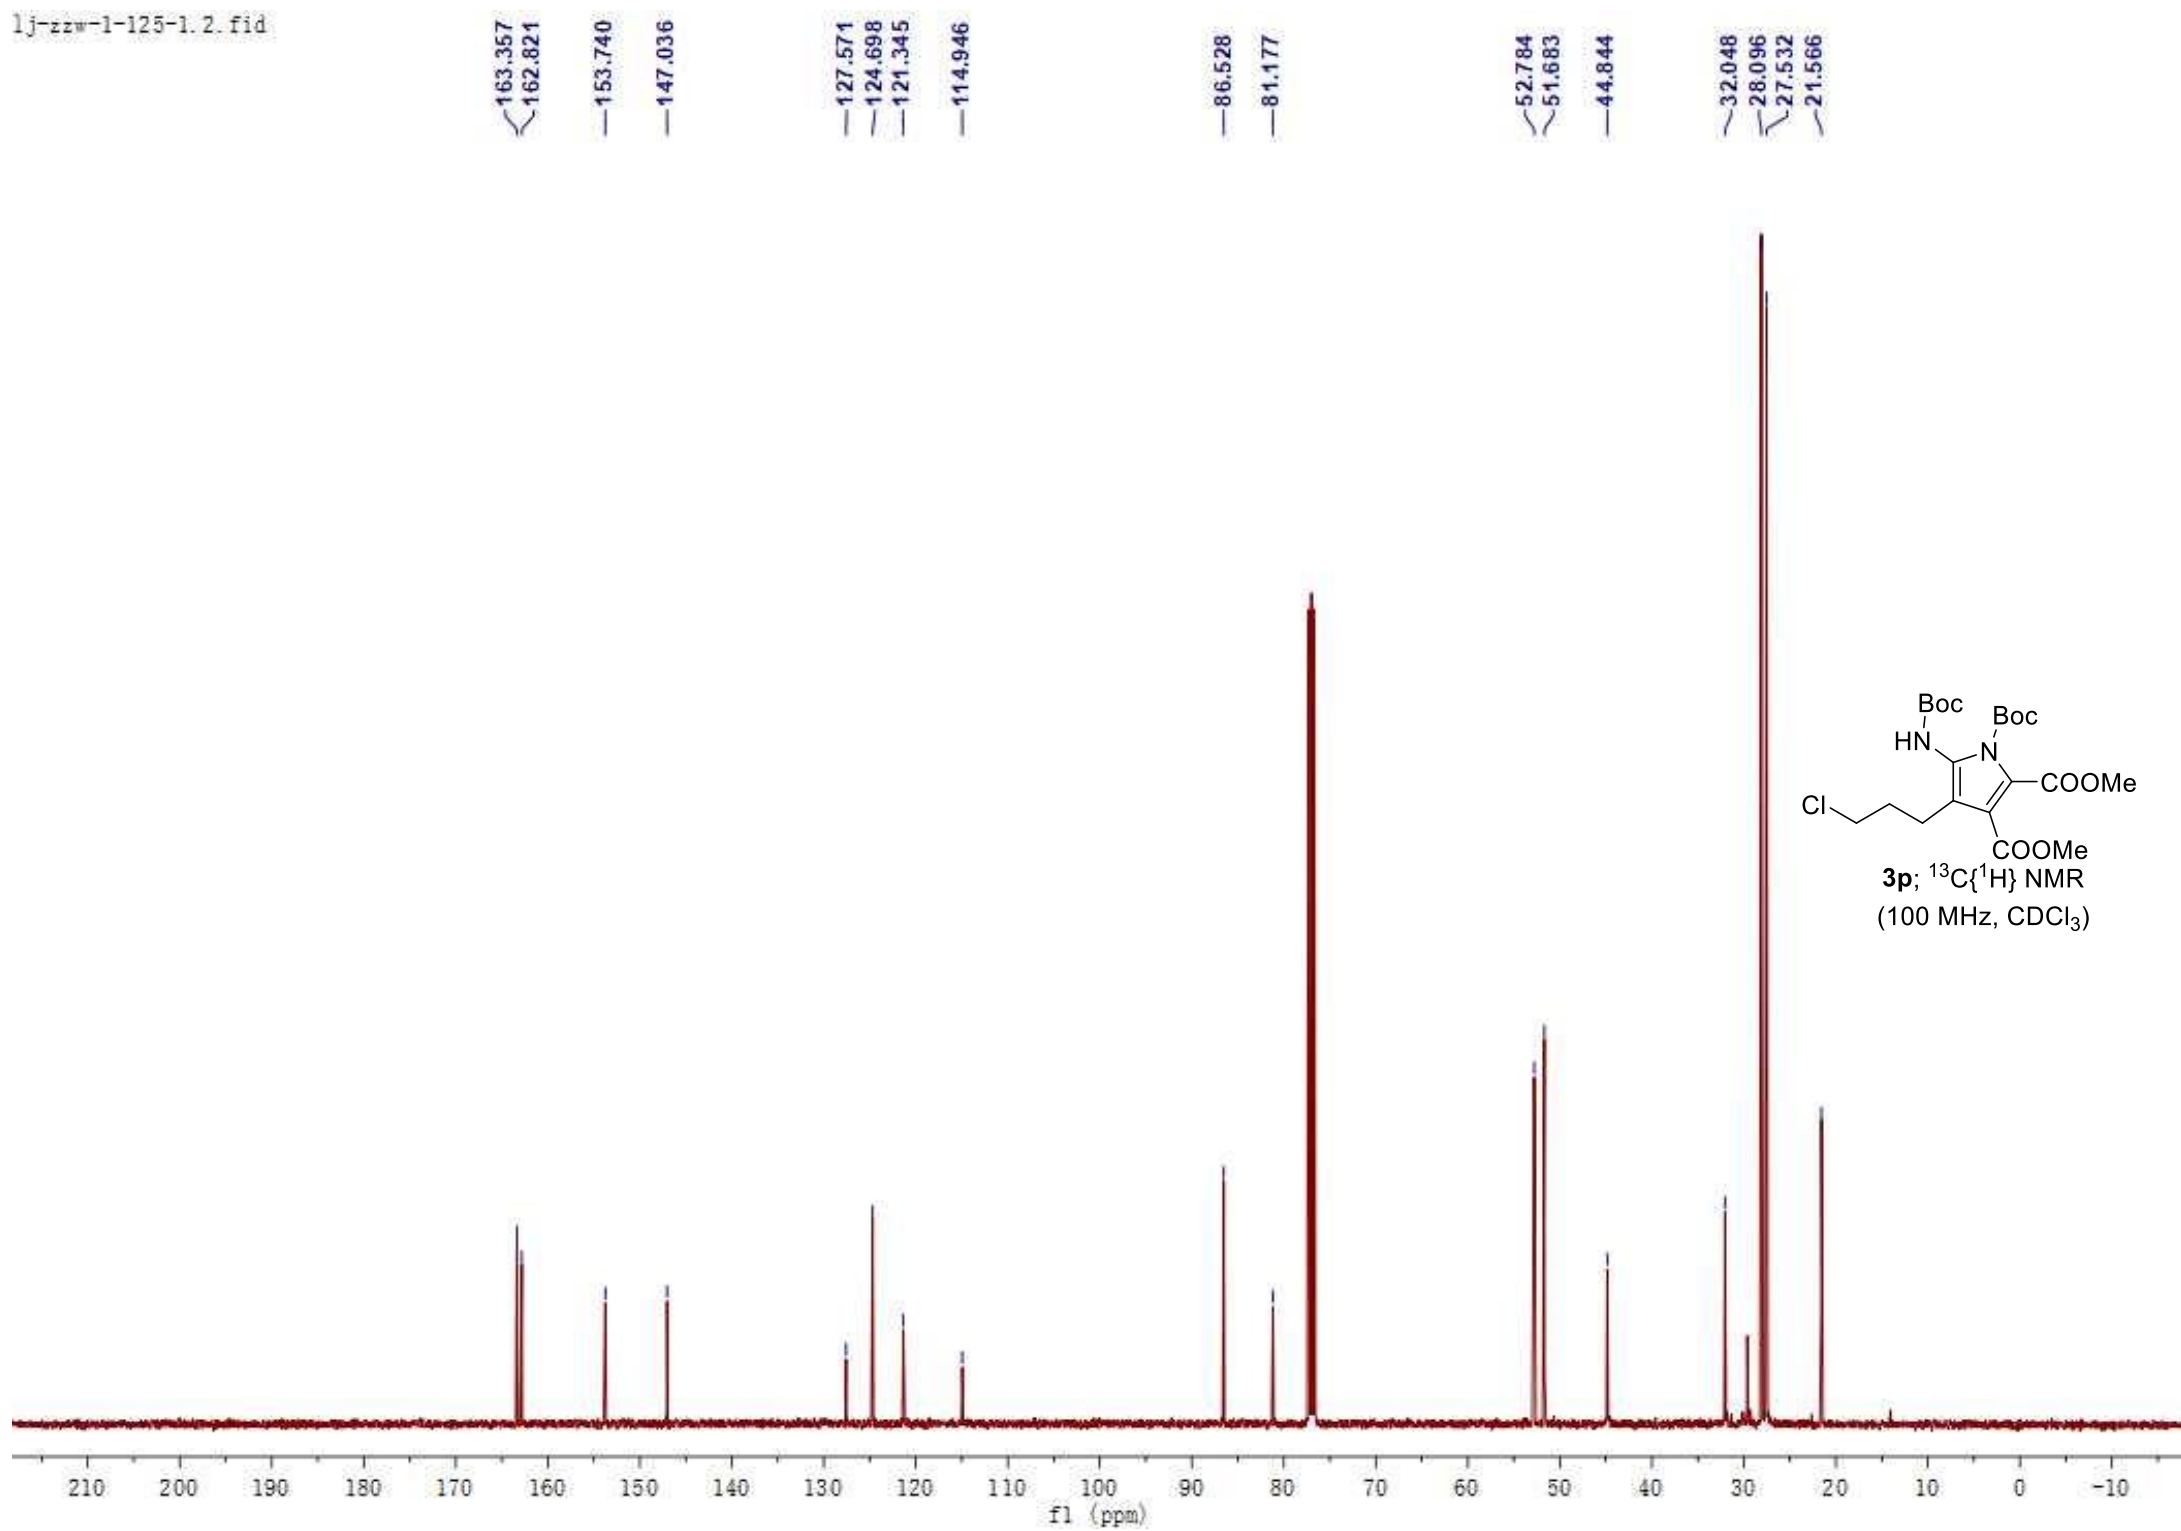

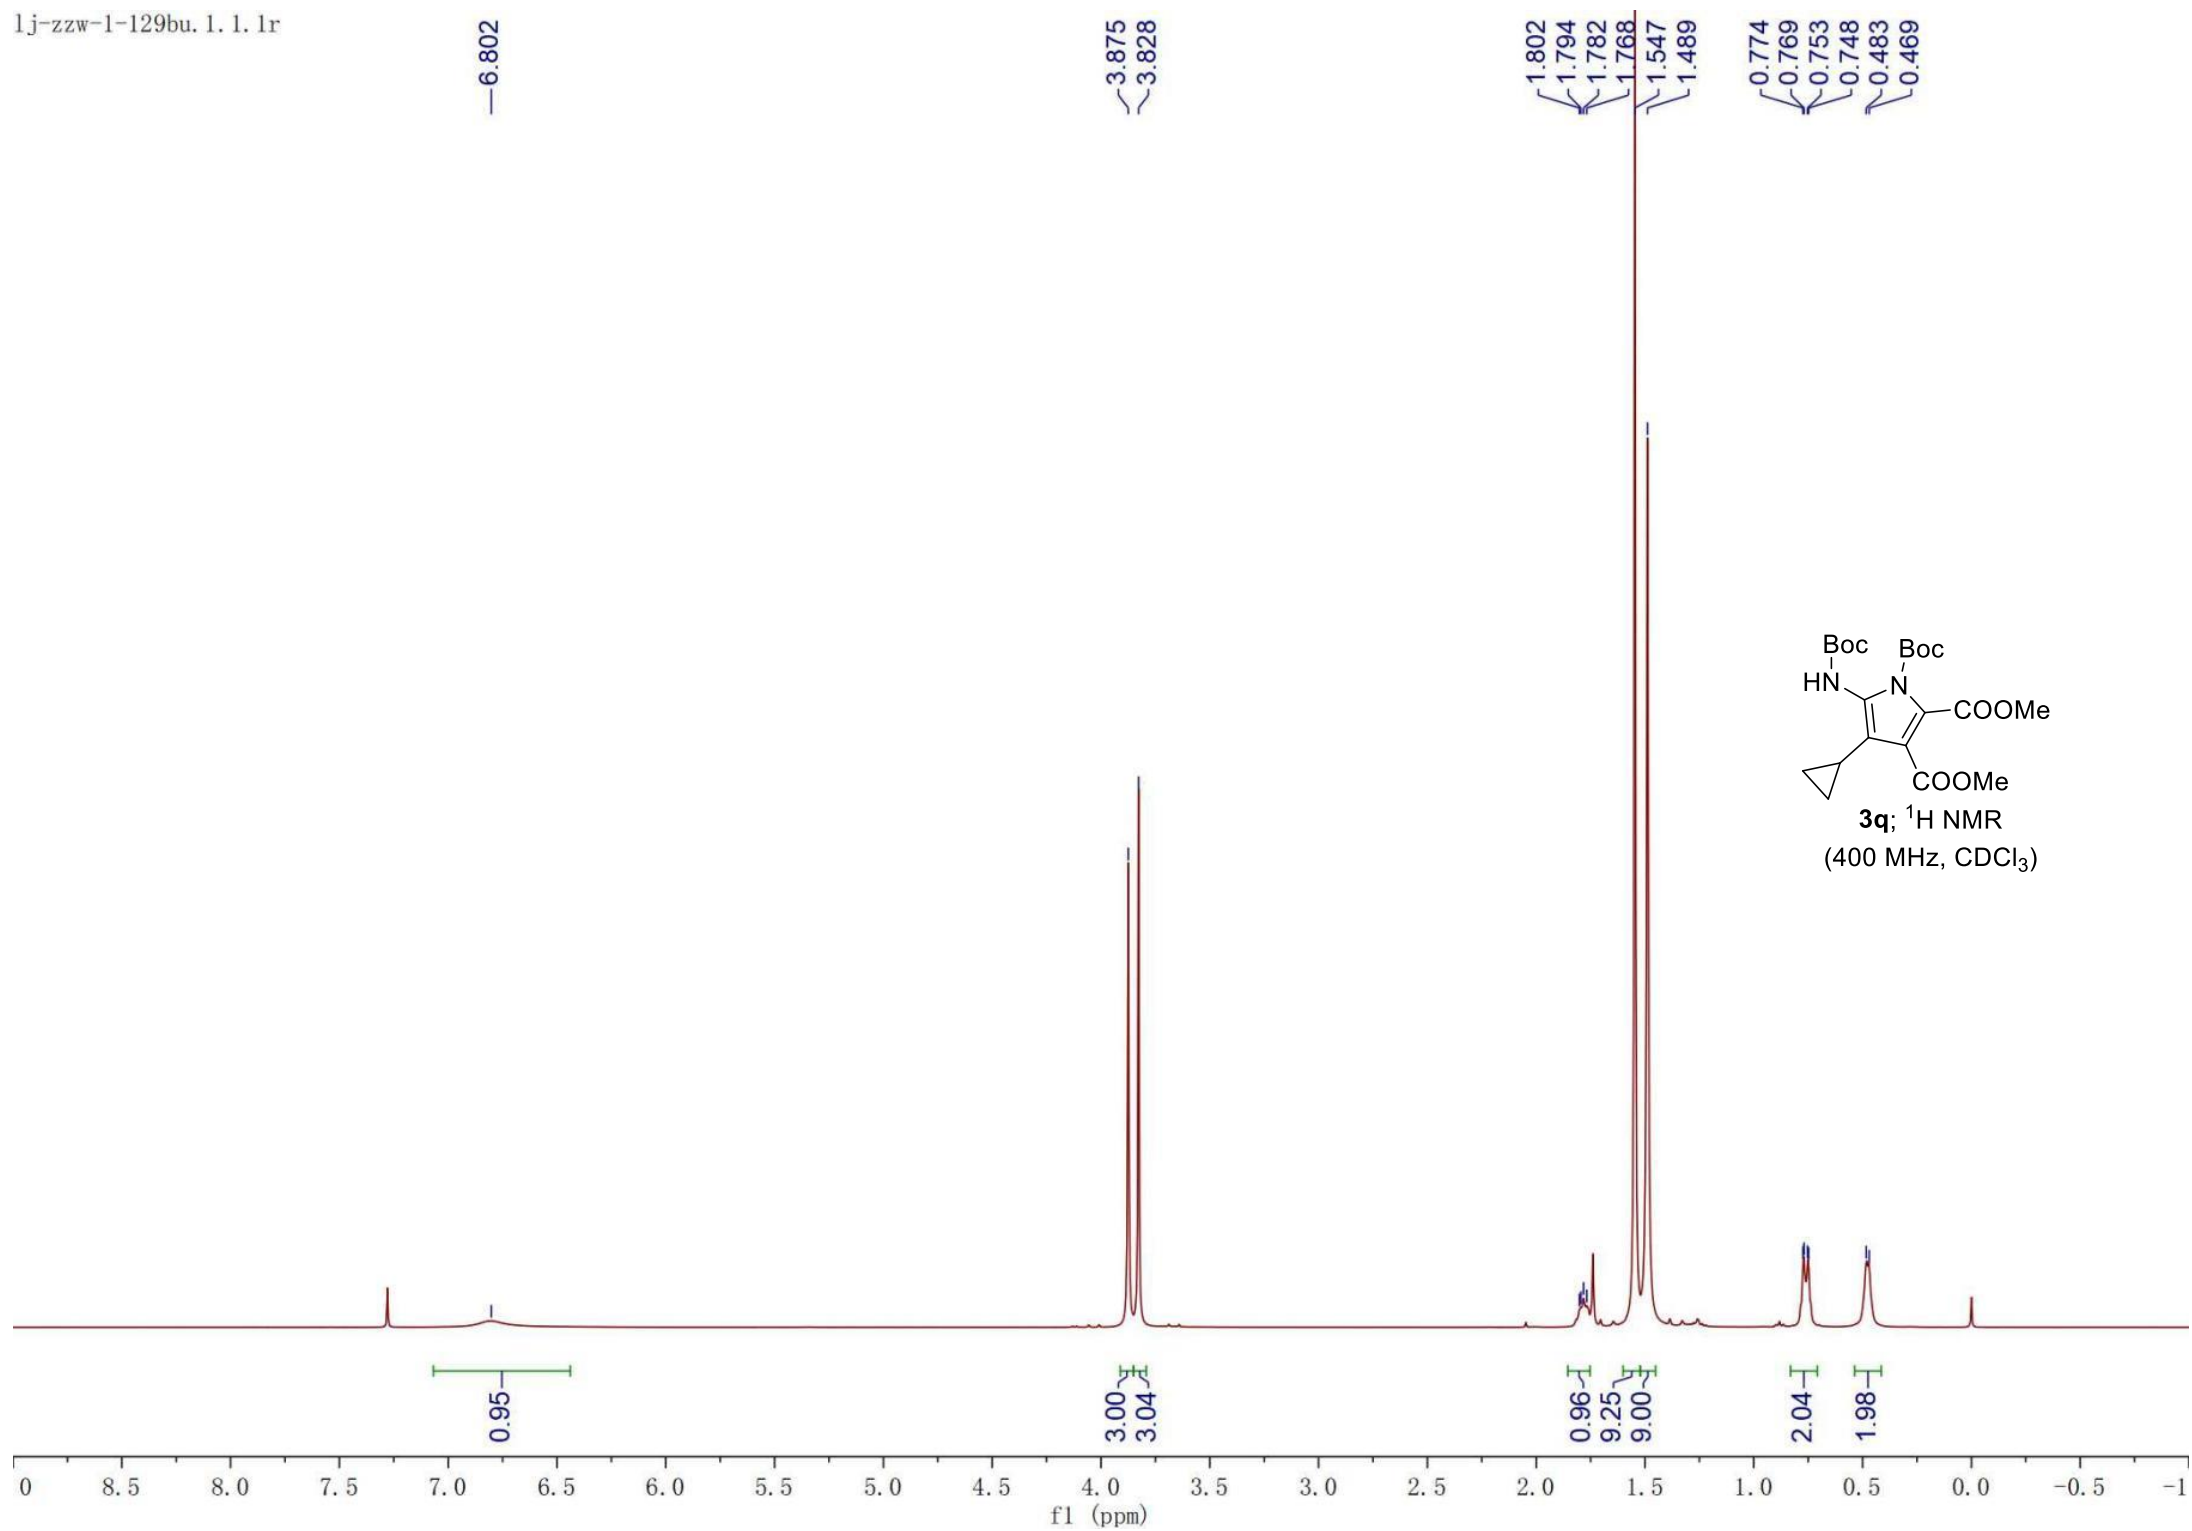

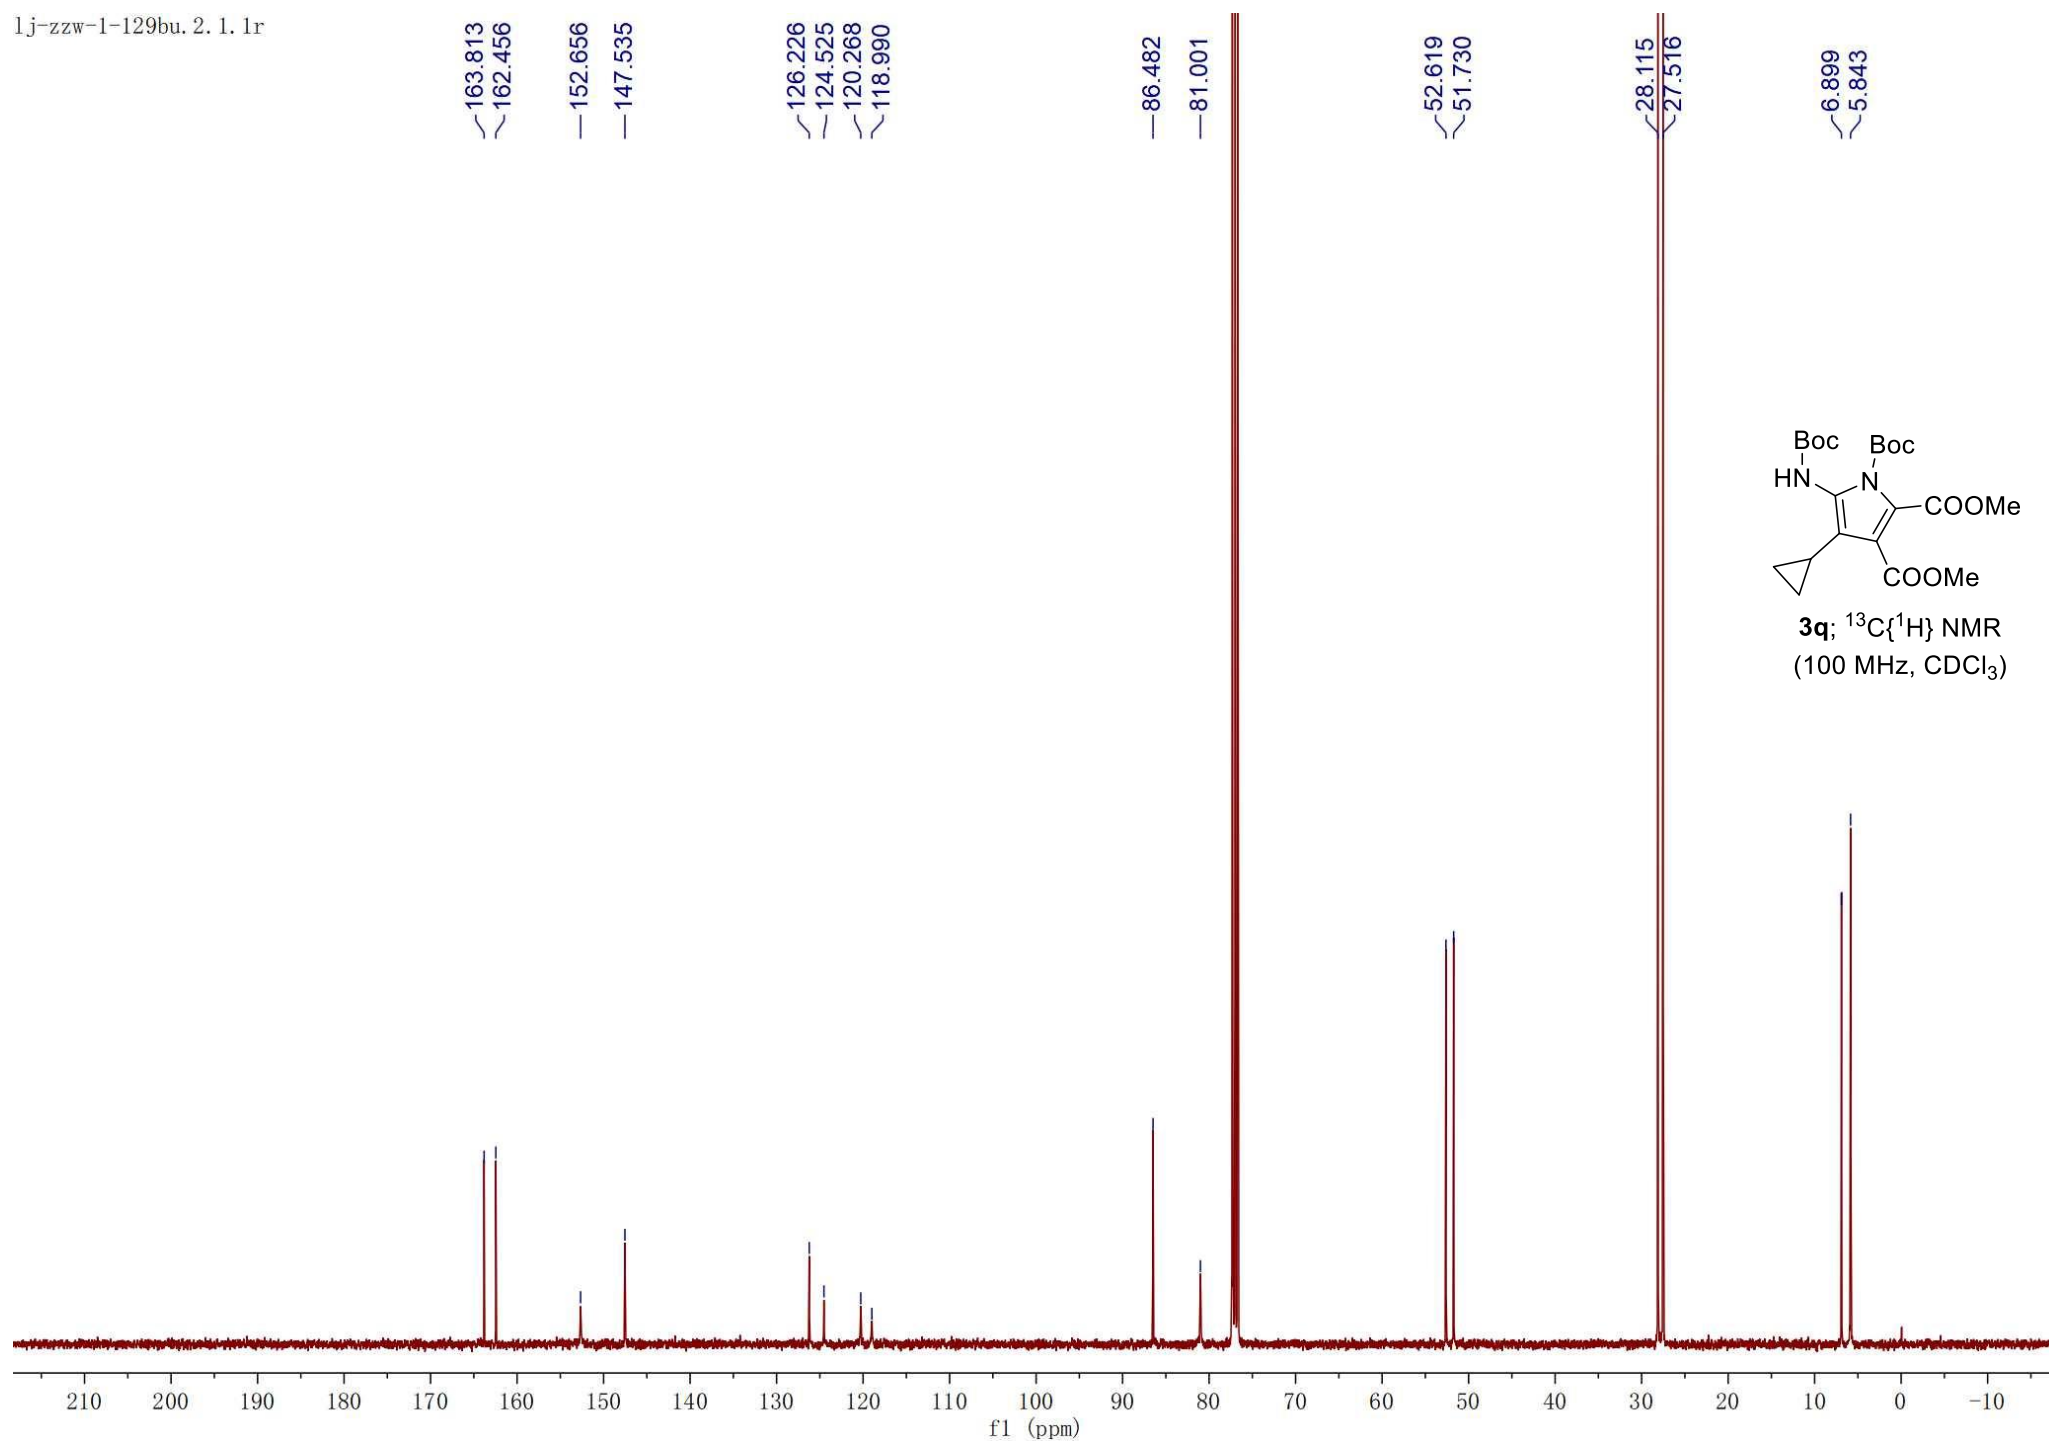



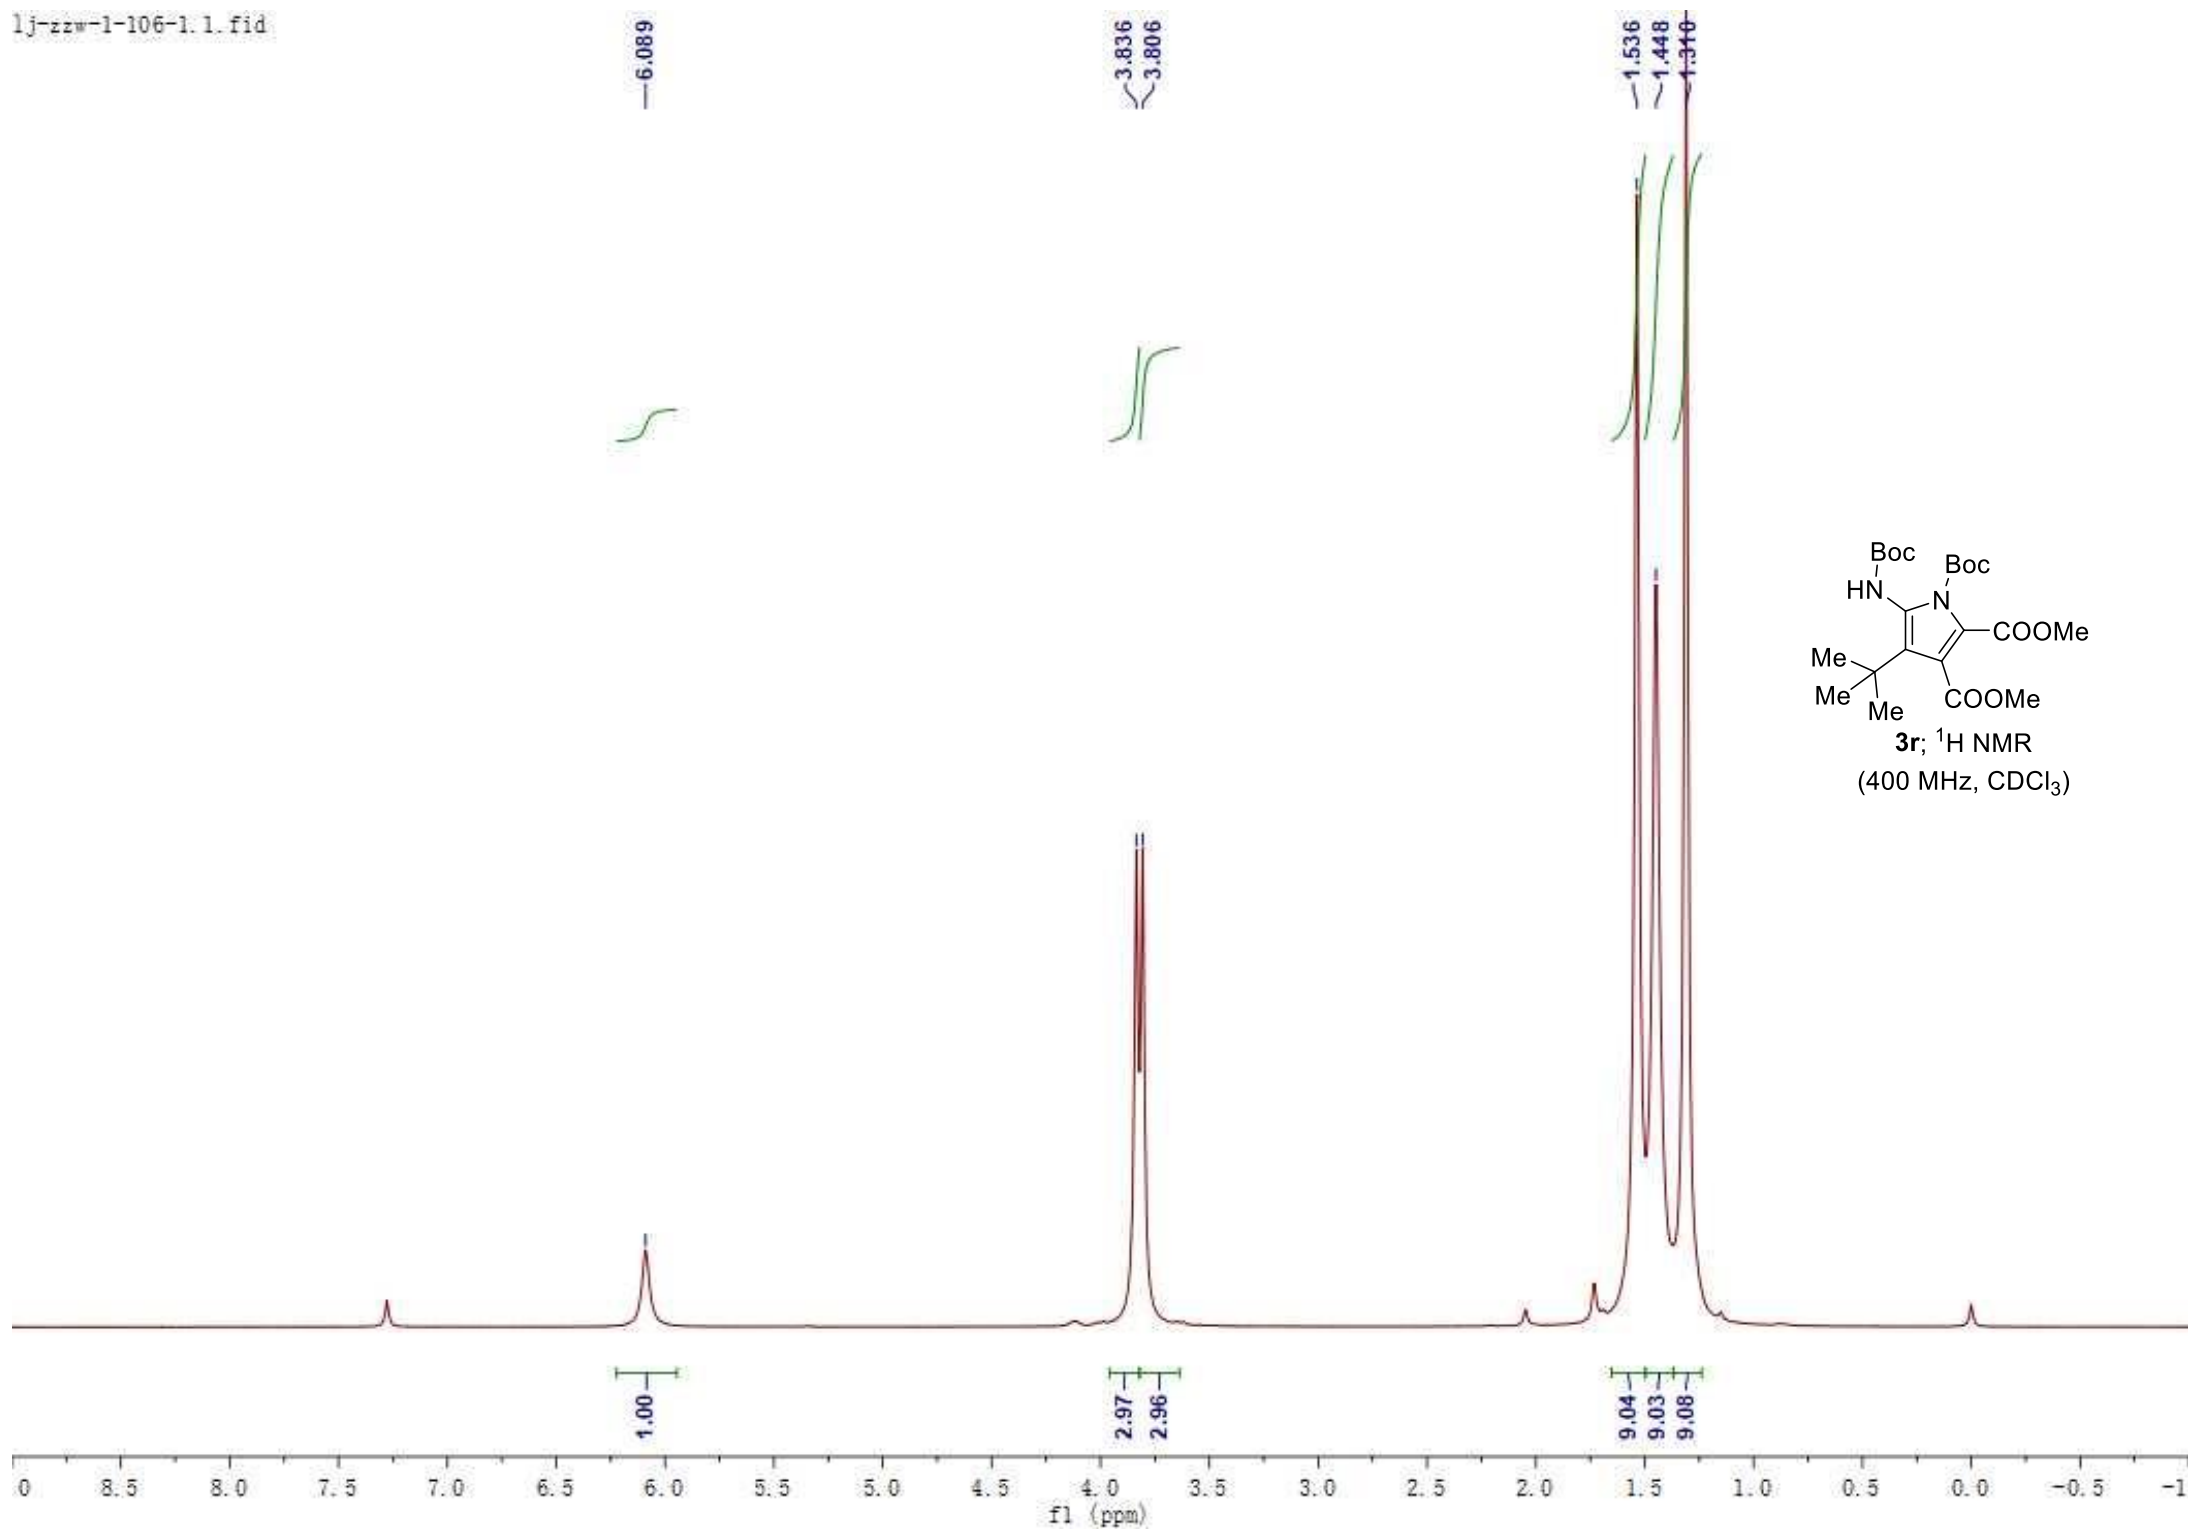

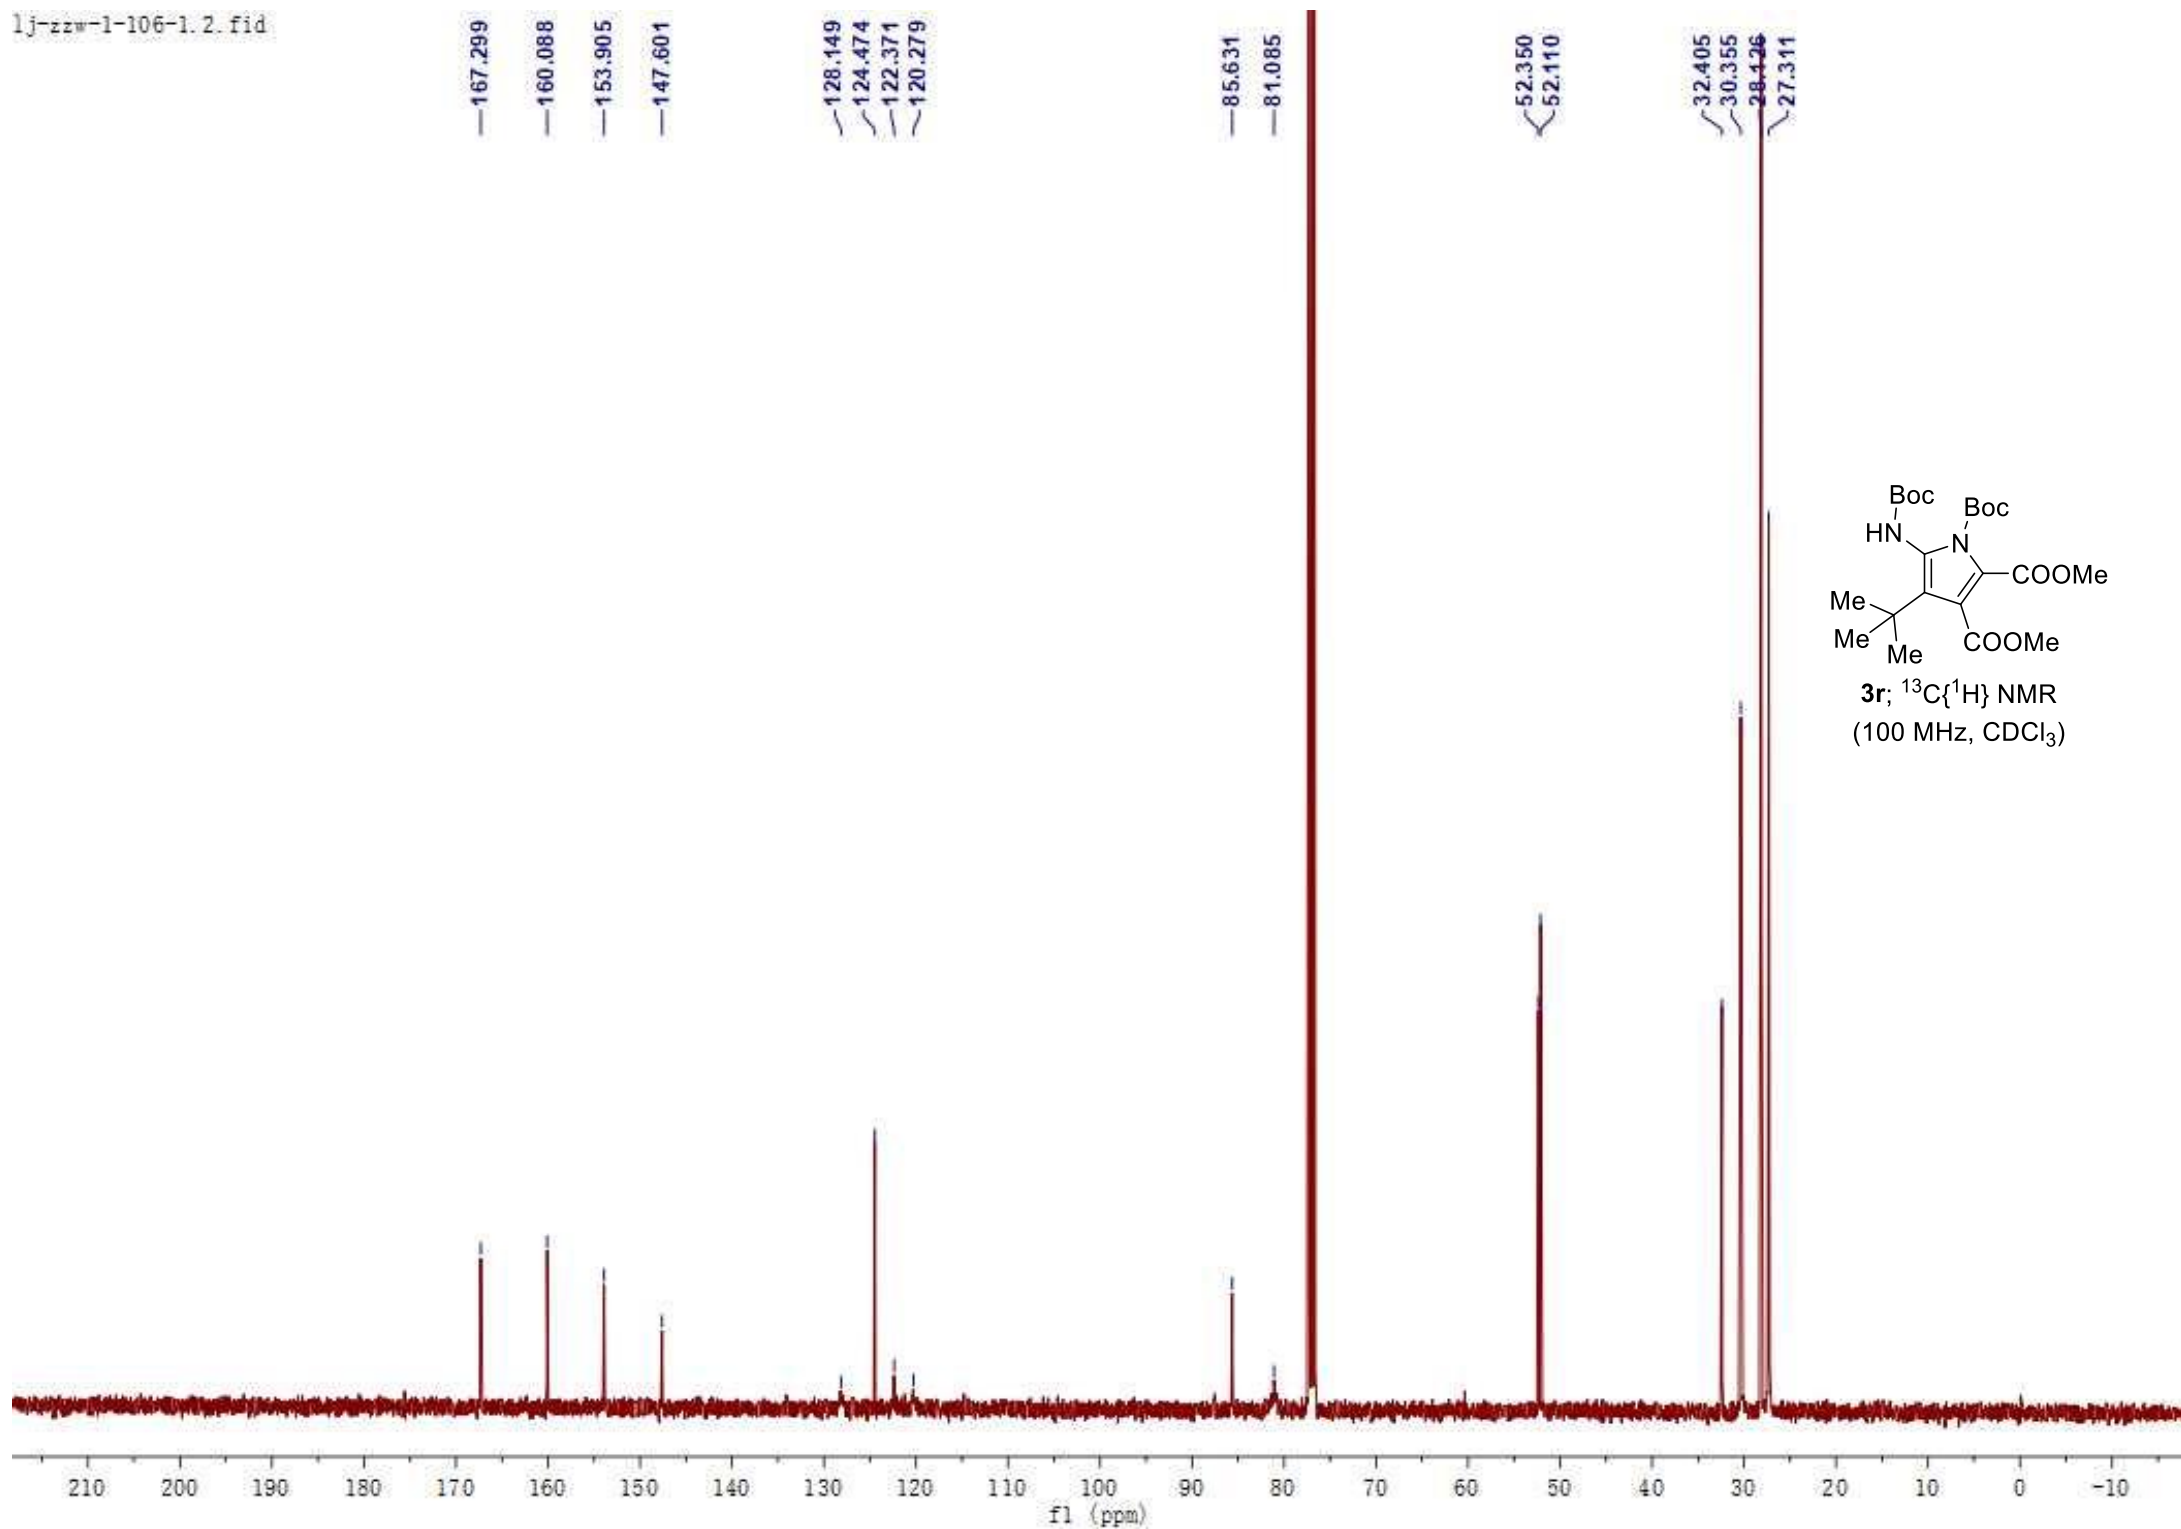

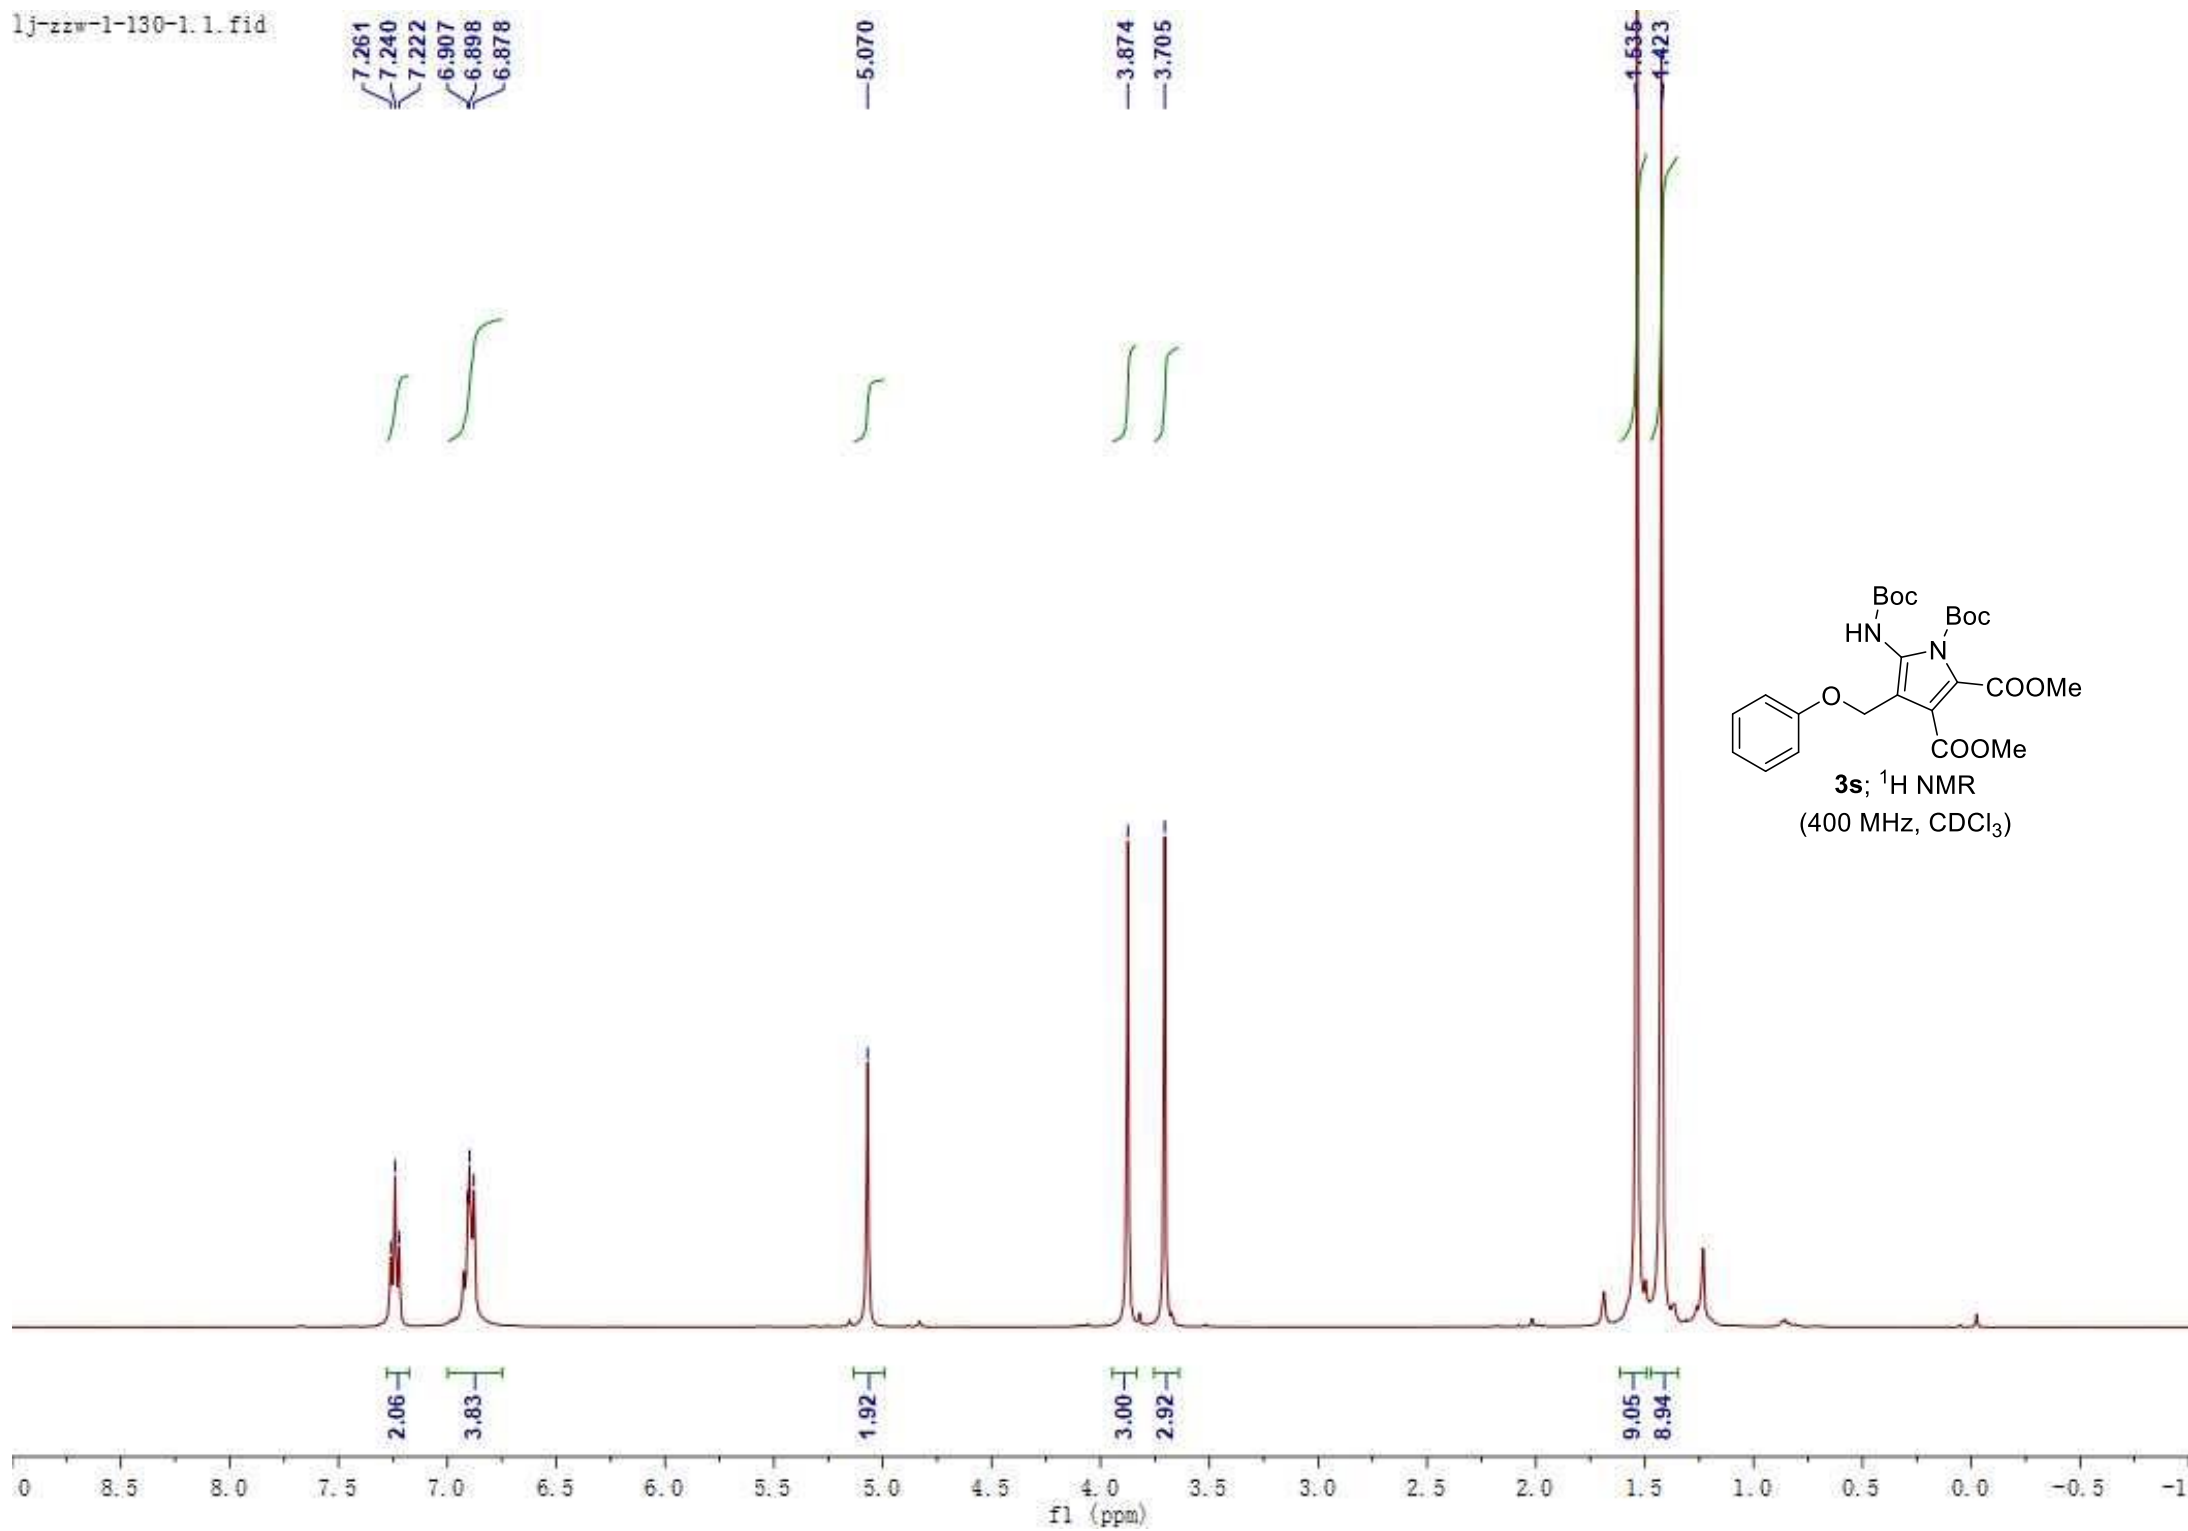

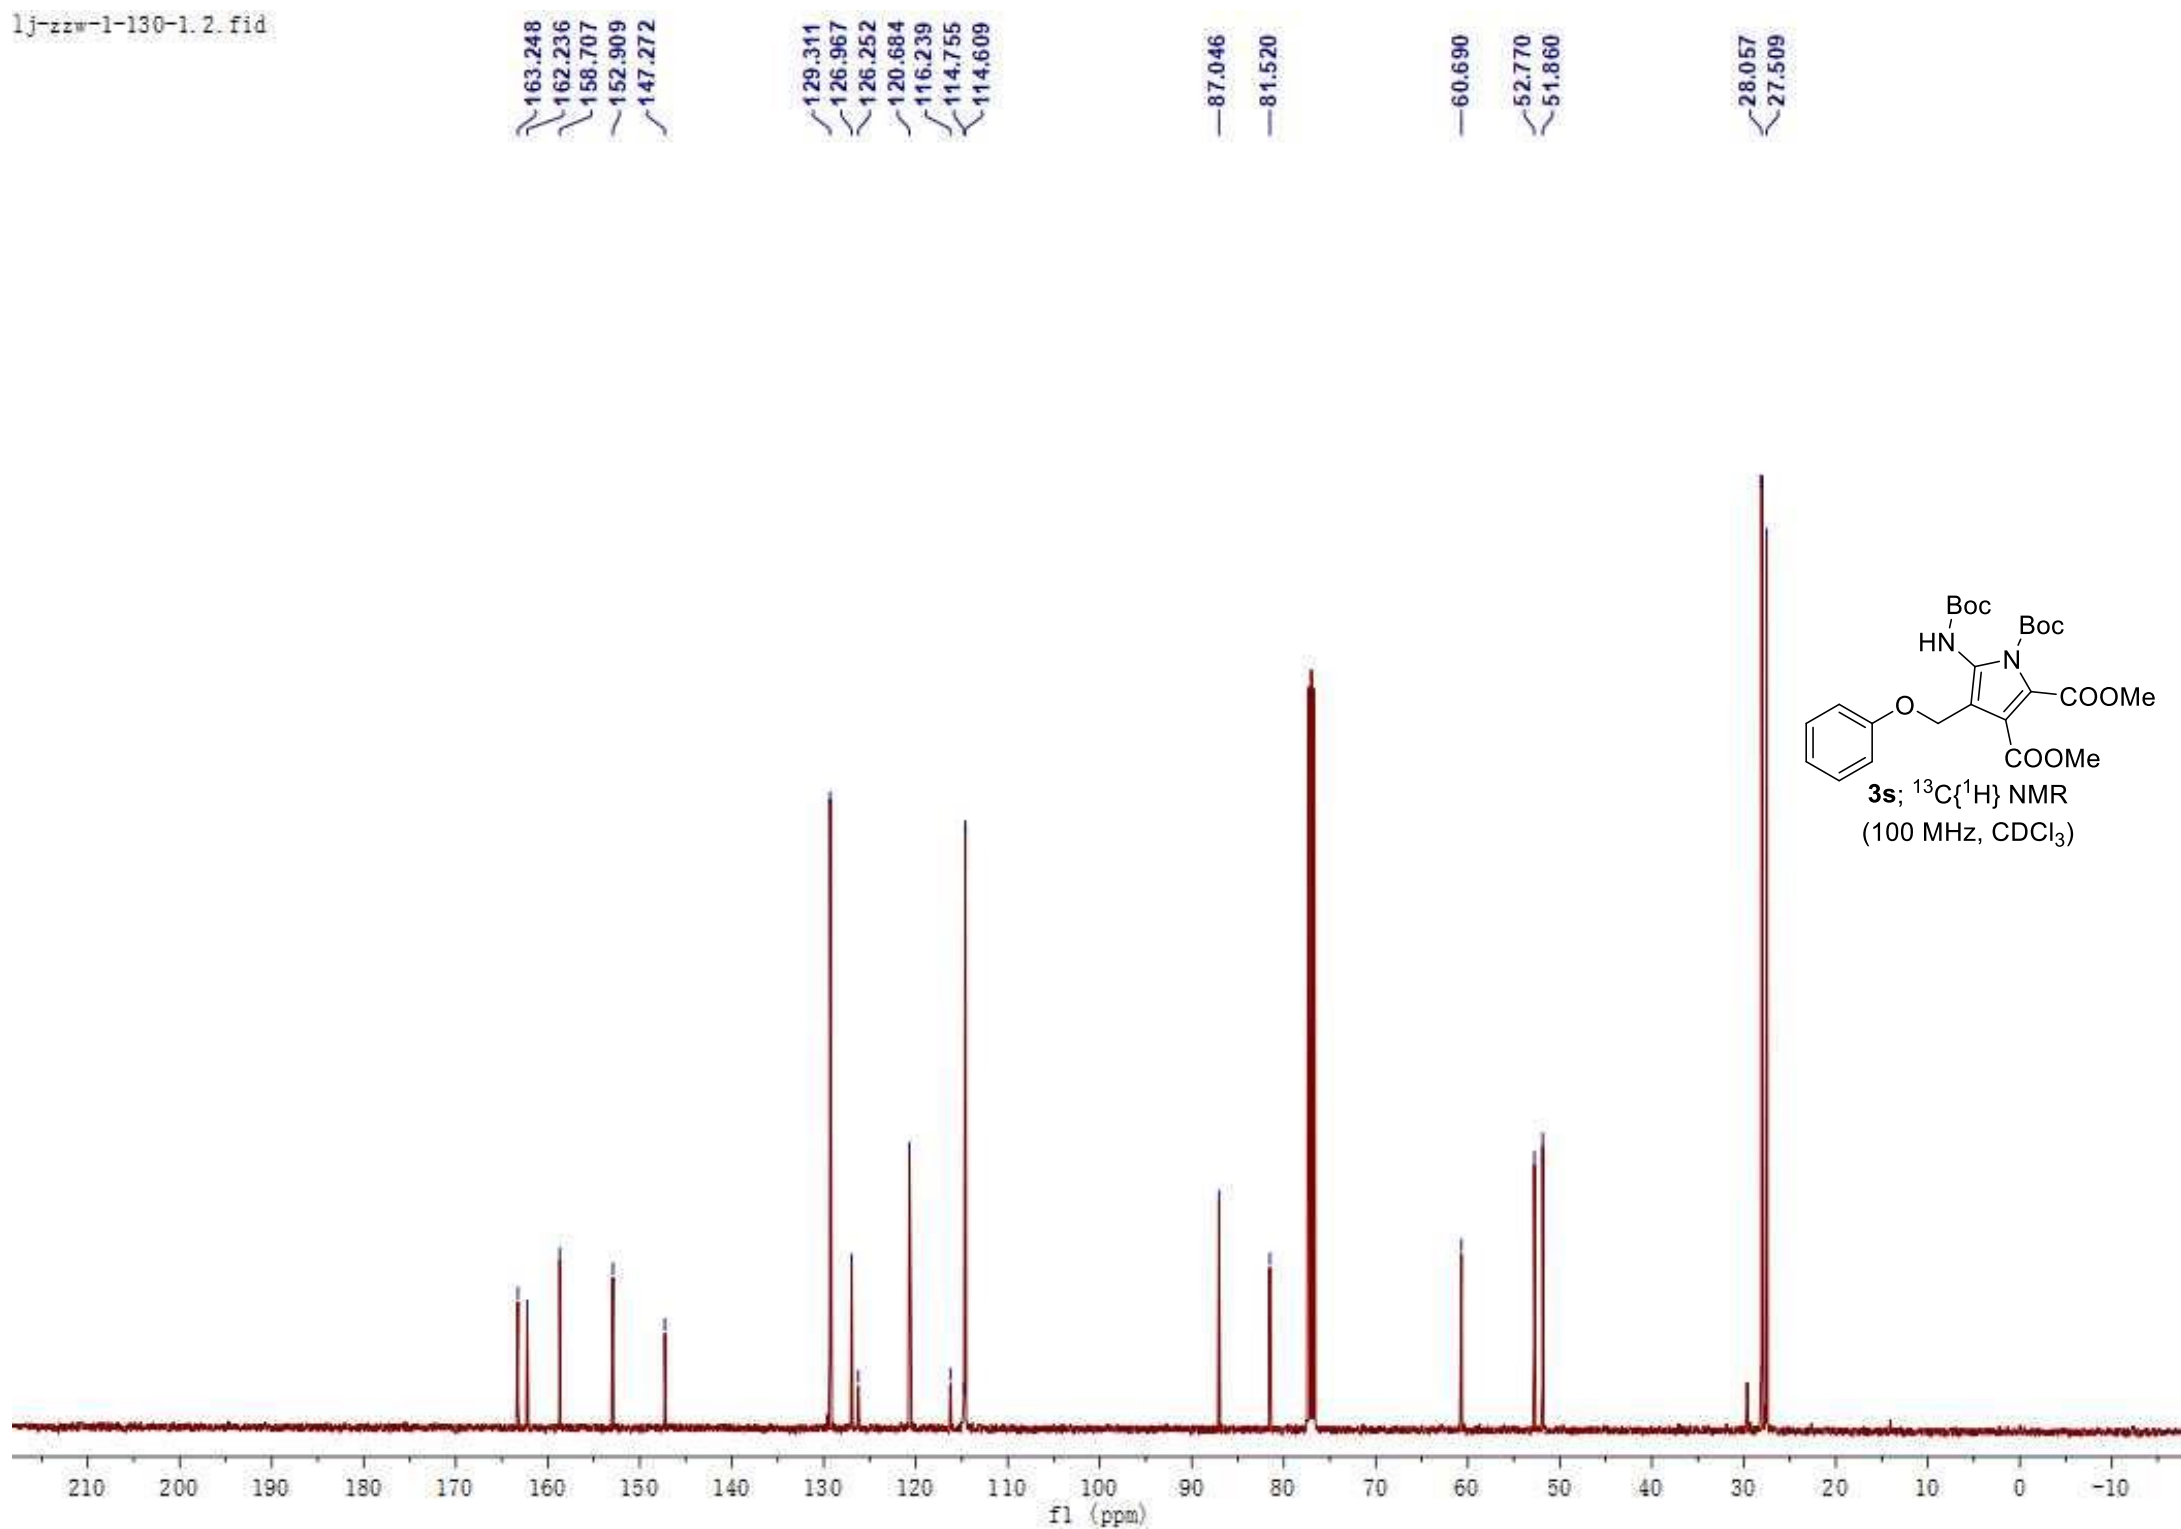

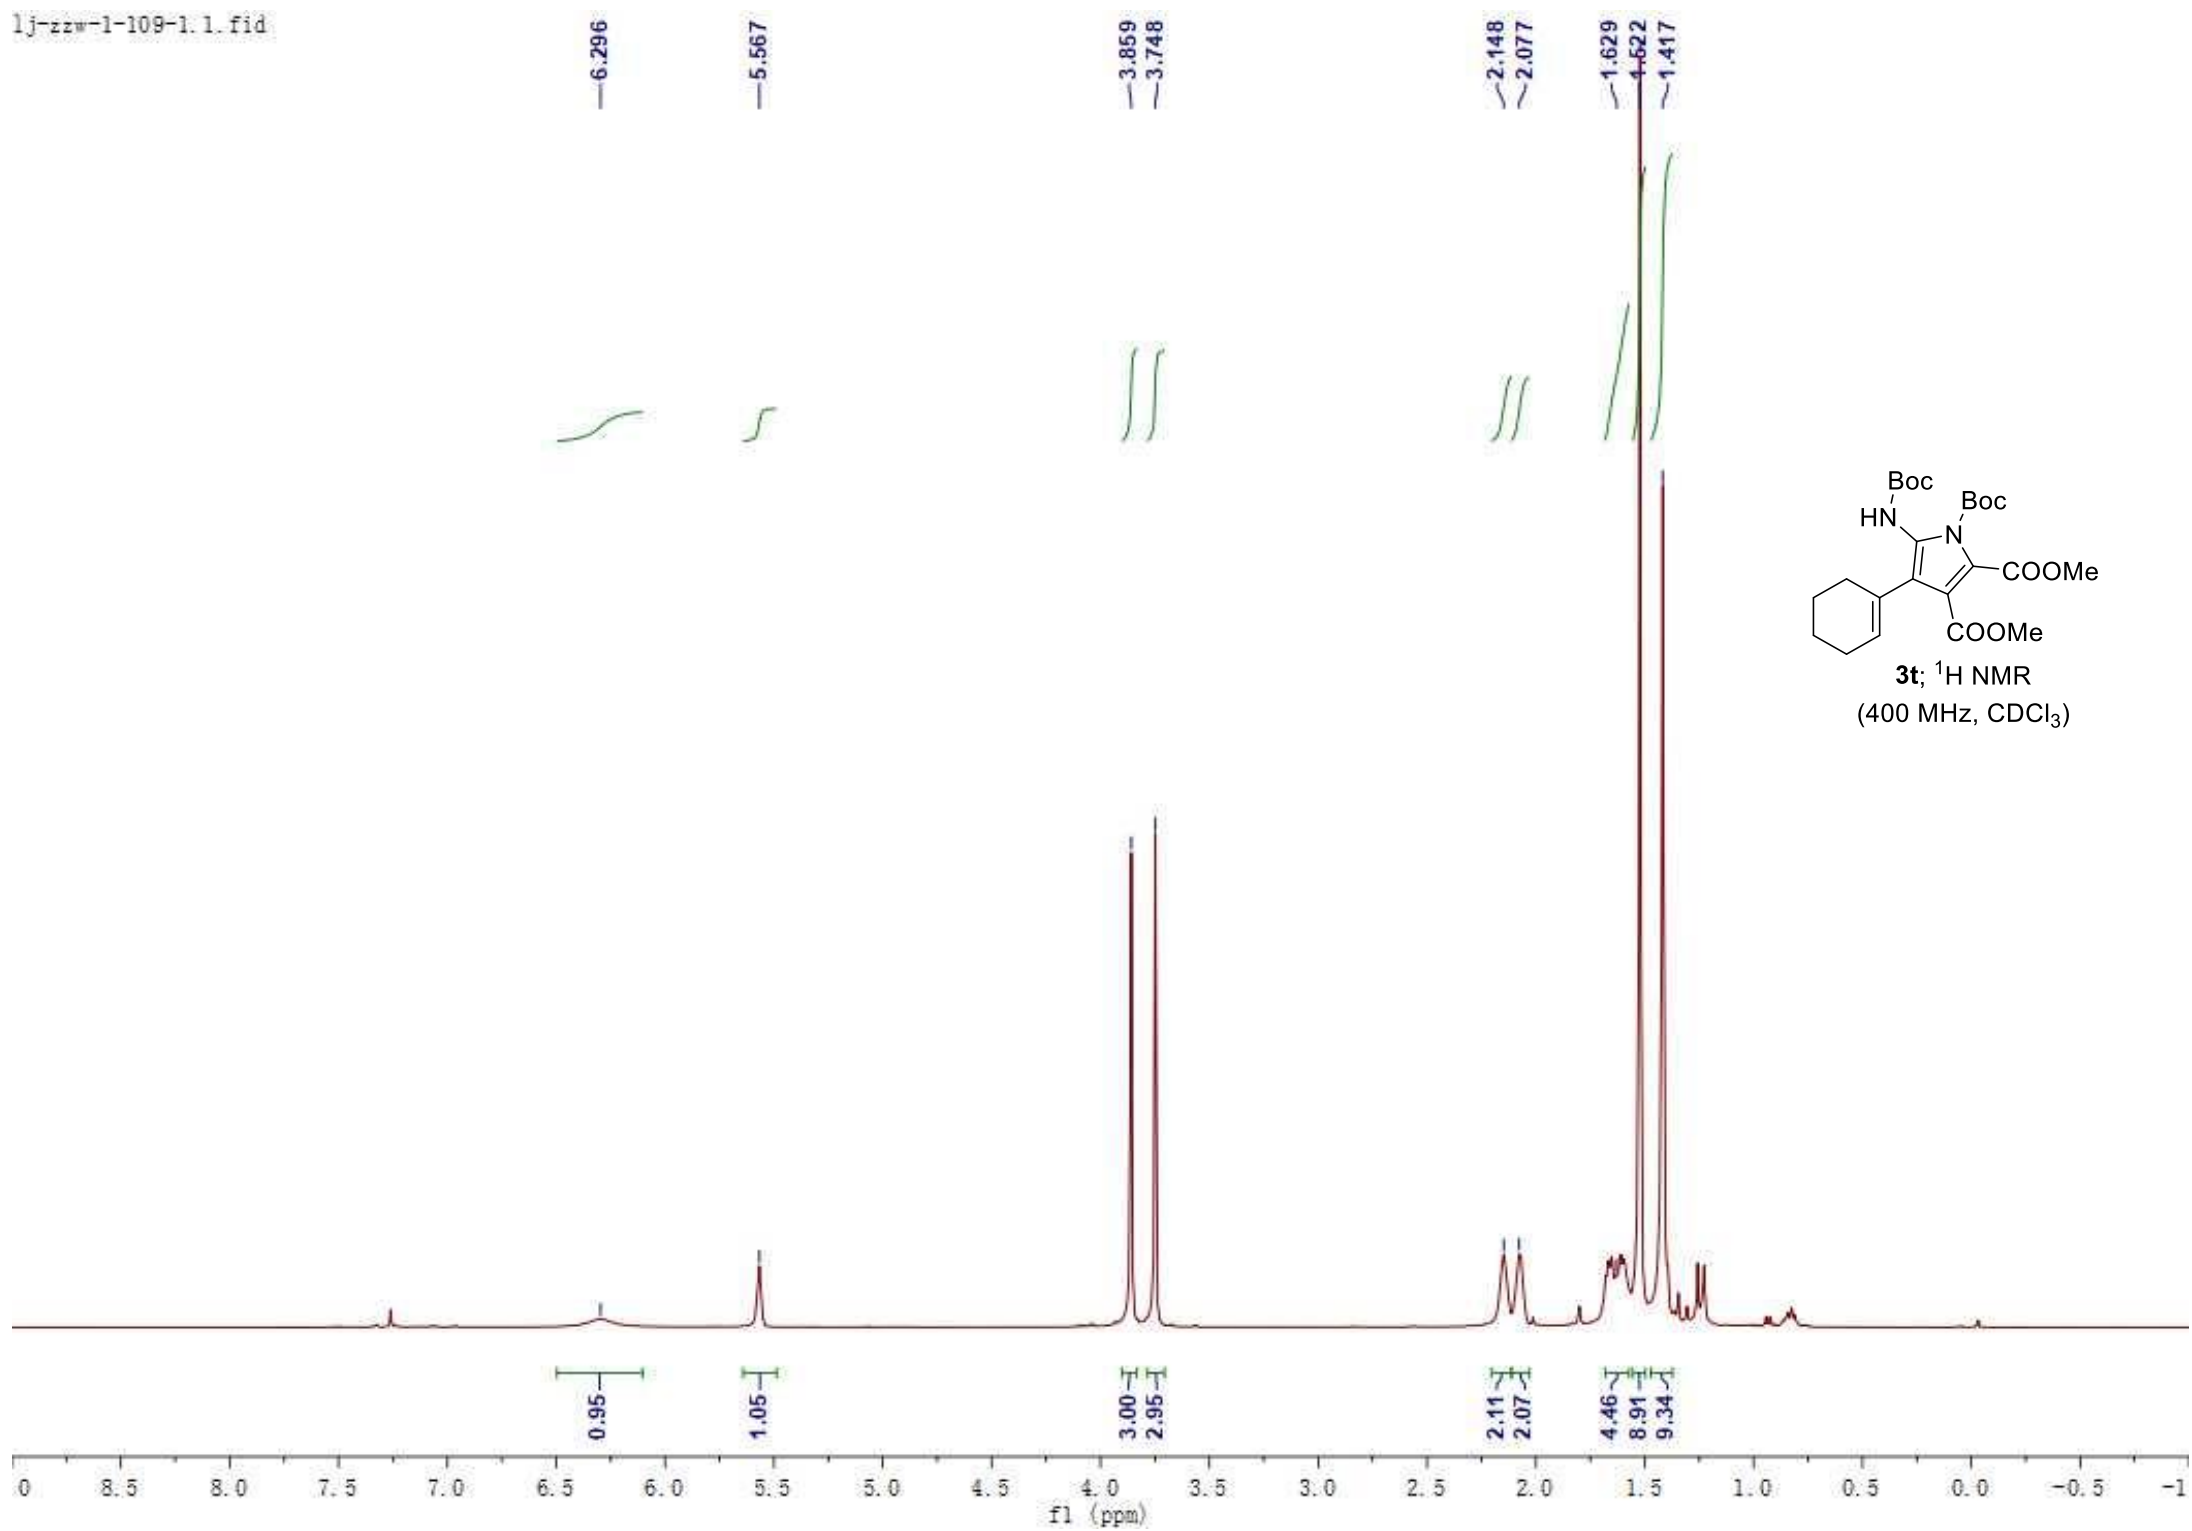

lj-zzw-1-109-1-re(two).2.1.1r

163.605  
162.463

153.311

147.342

129.936  
127.243  
125.498  
124.622  
124.006  
116.706

86.287

80.783

52.663  
51.776

28.619  
28.079  
27.524  
25.478  
22.926  
21.990

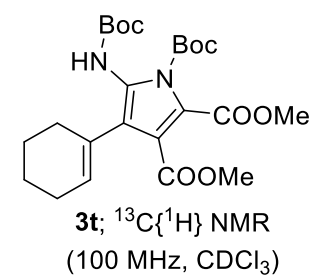

210 200 190 180 170 160 150 140 130 120 110 100 90 80 70 60 50 40 30 20 10 0 -10

f1 (ppm)

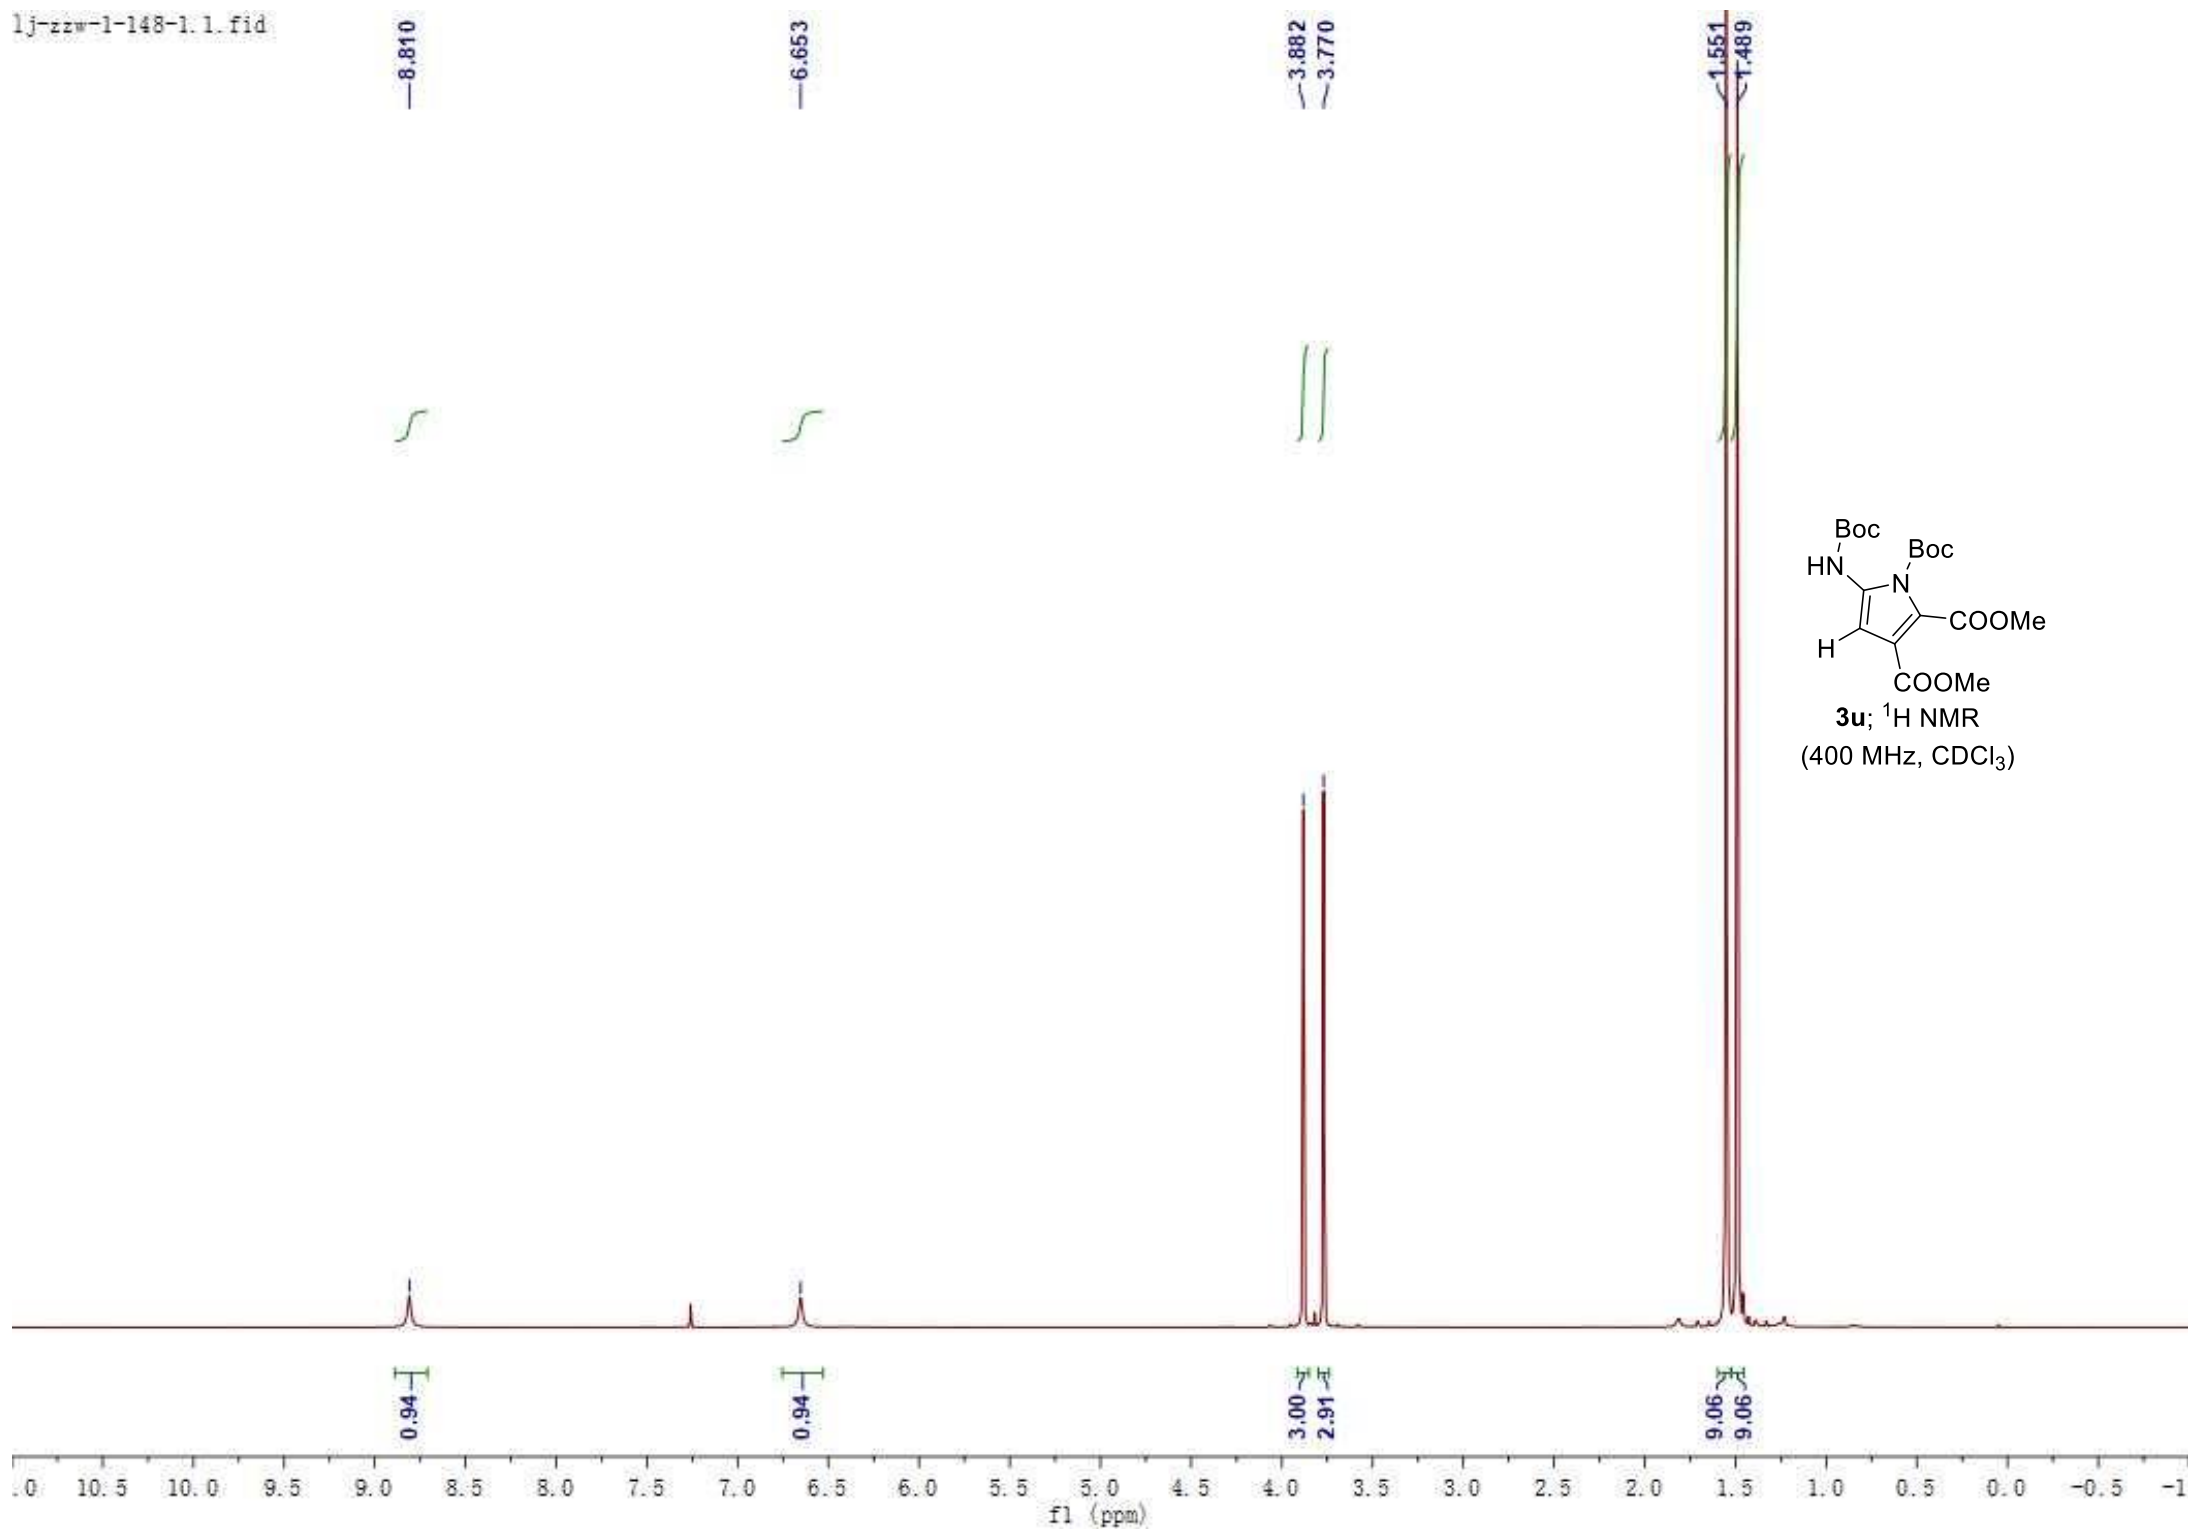

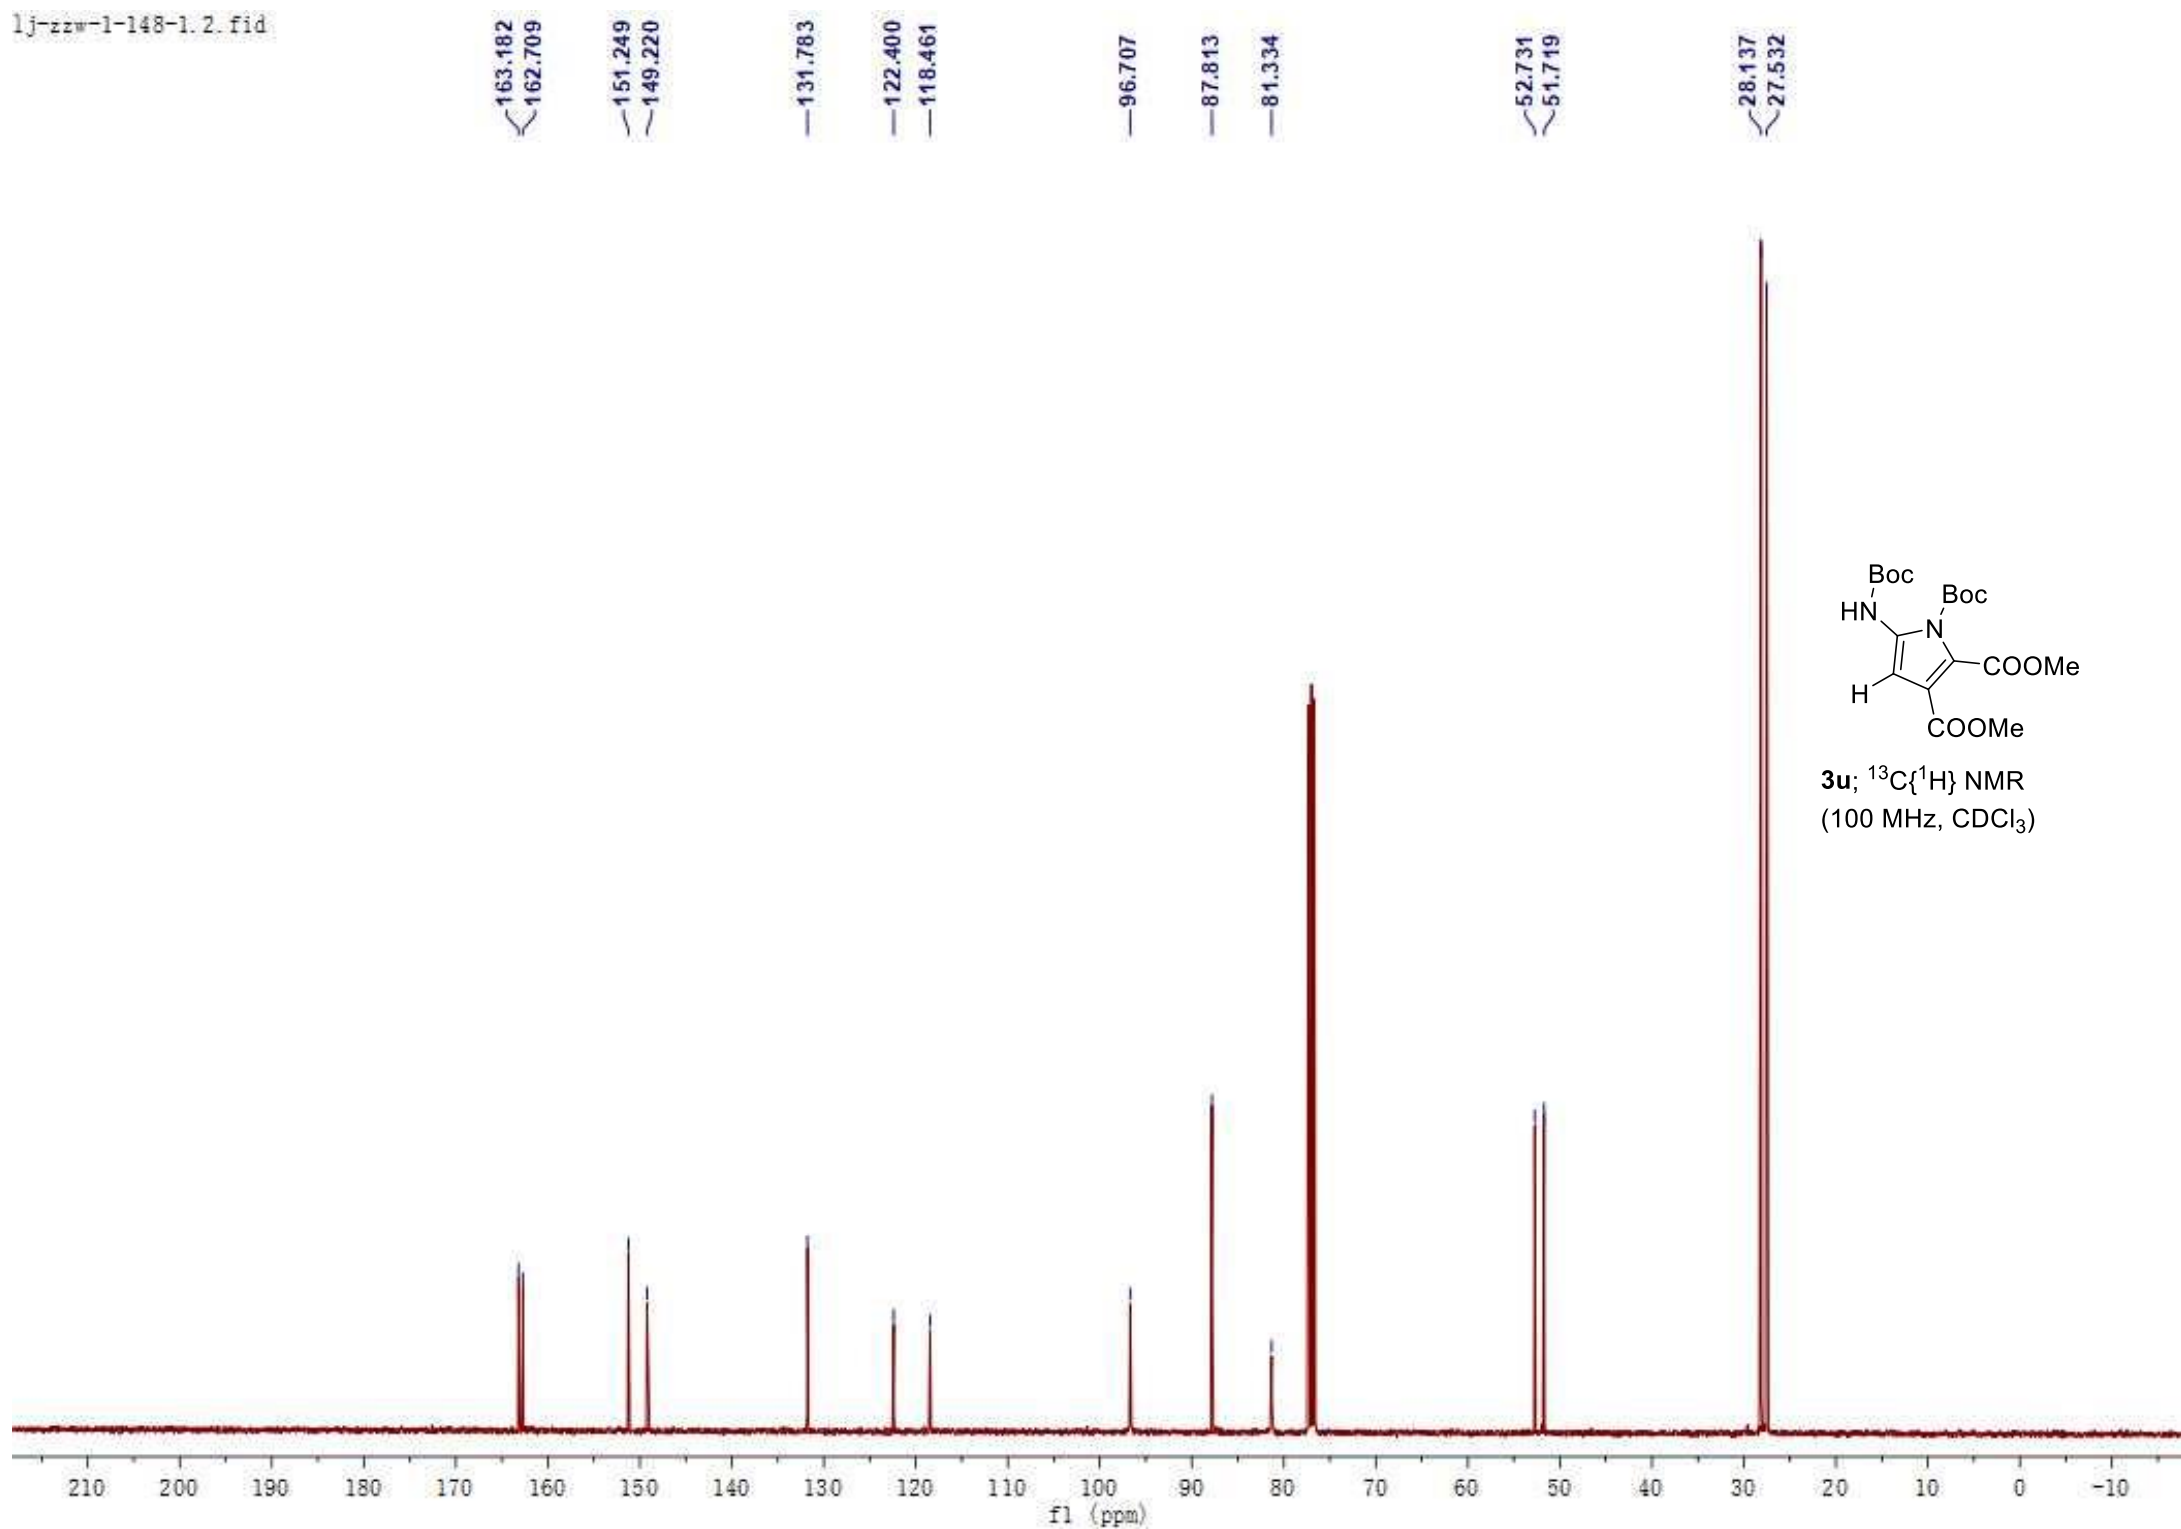



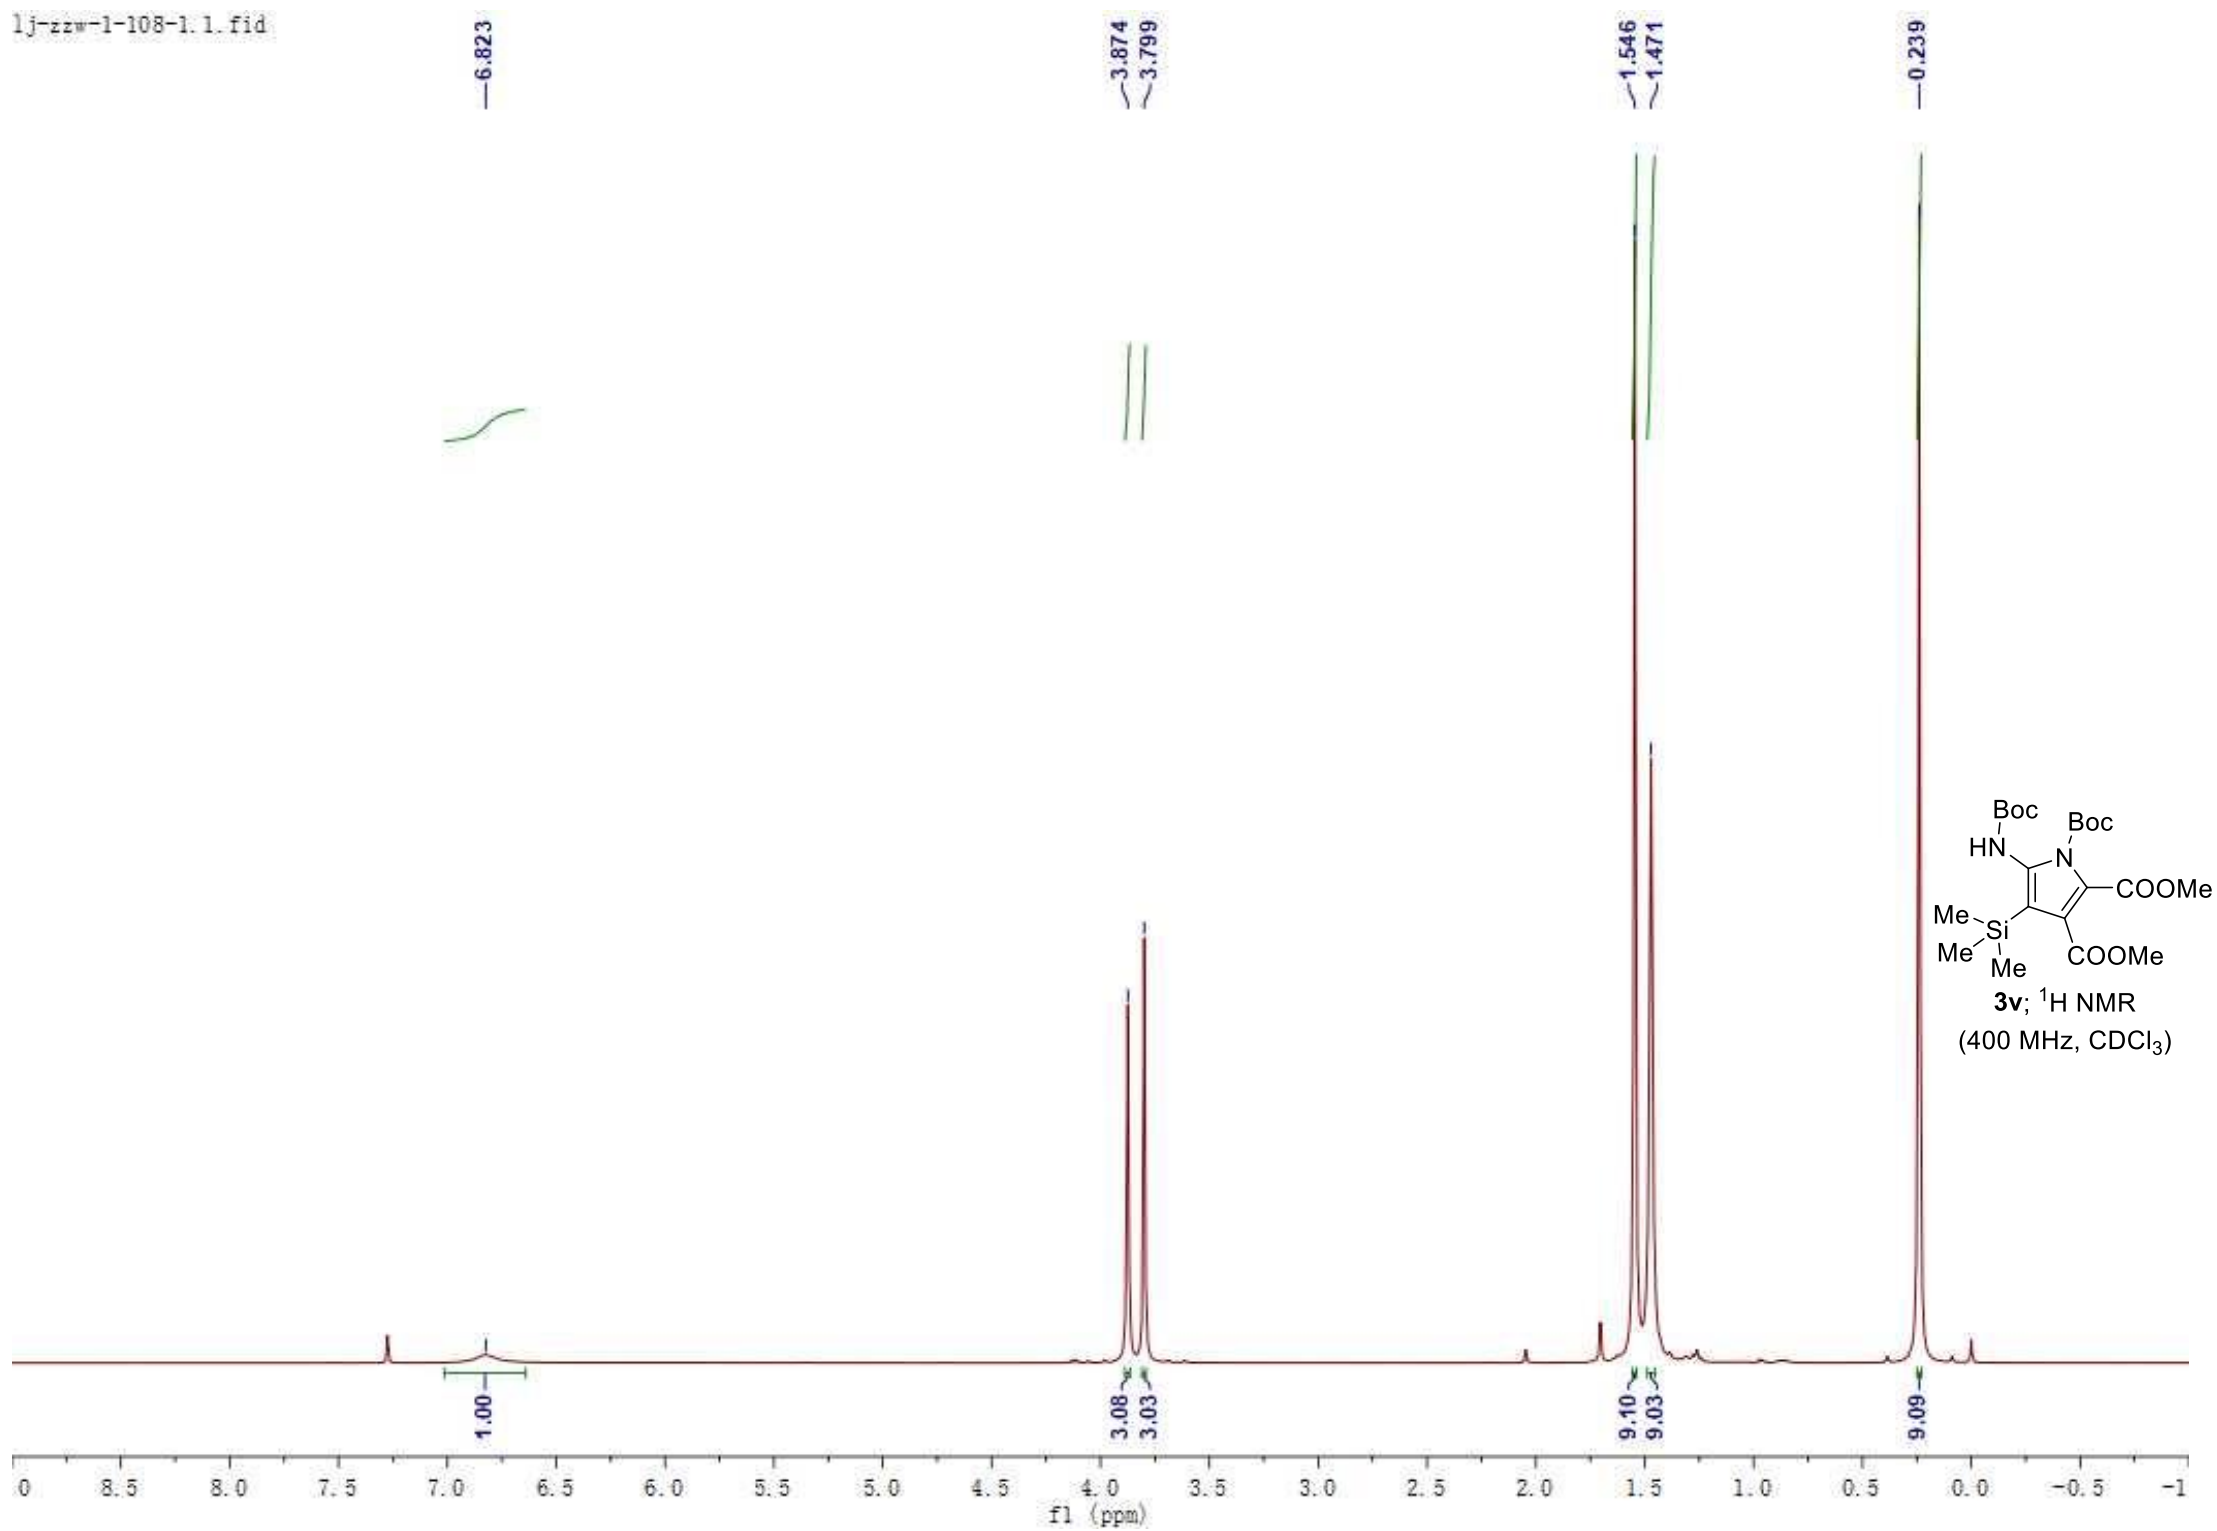

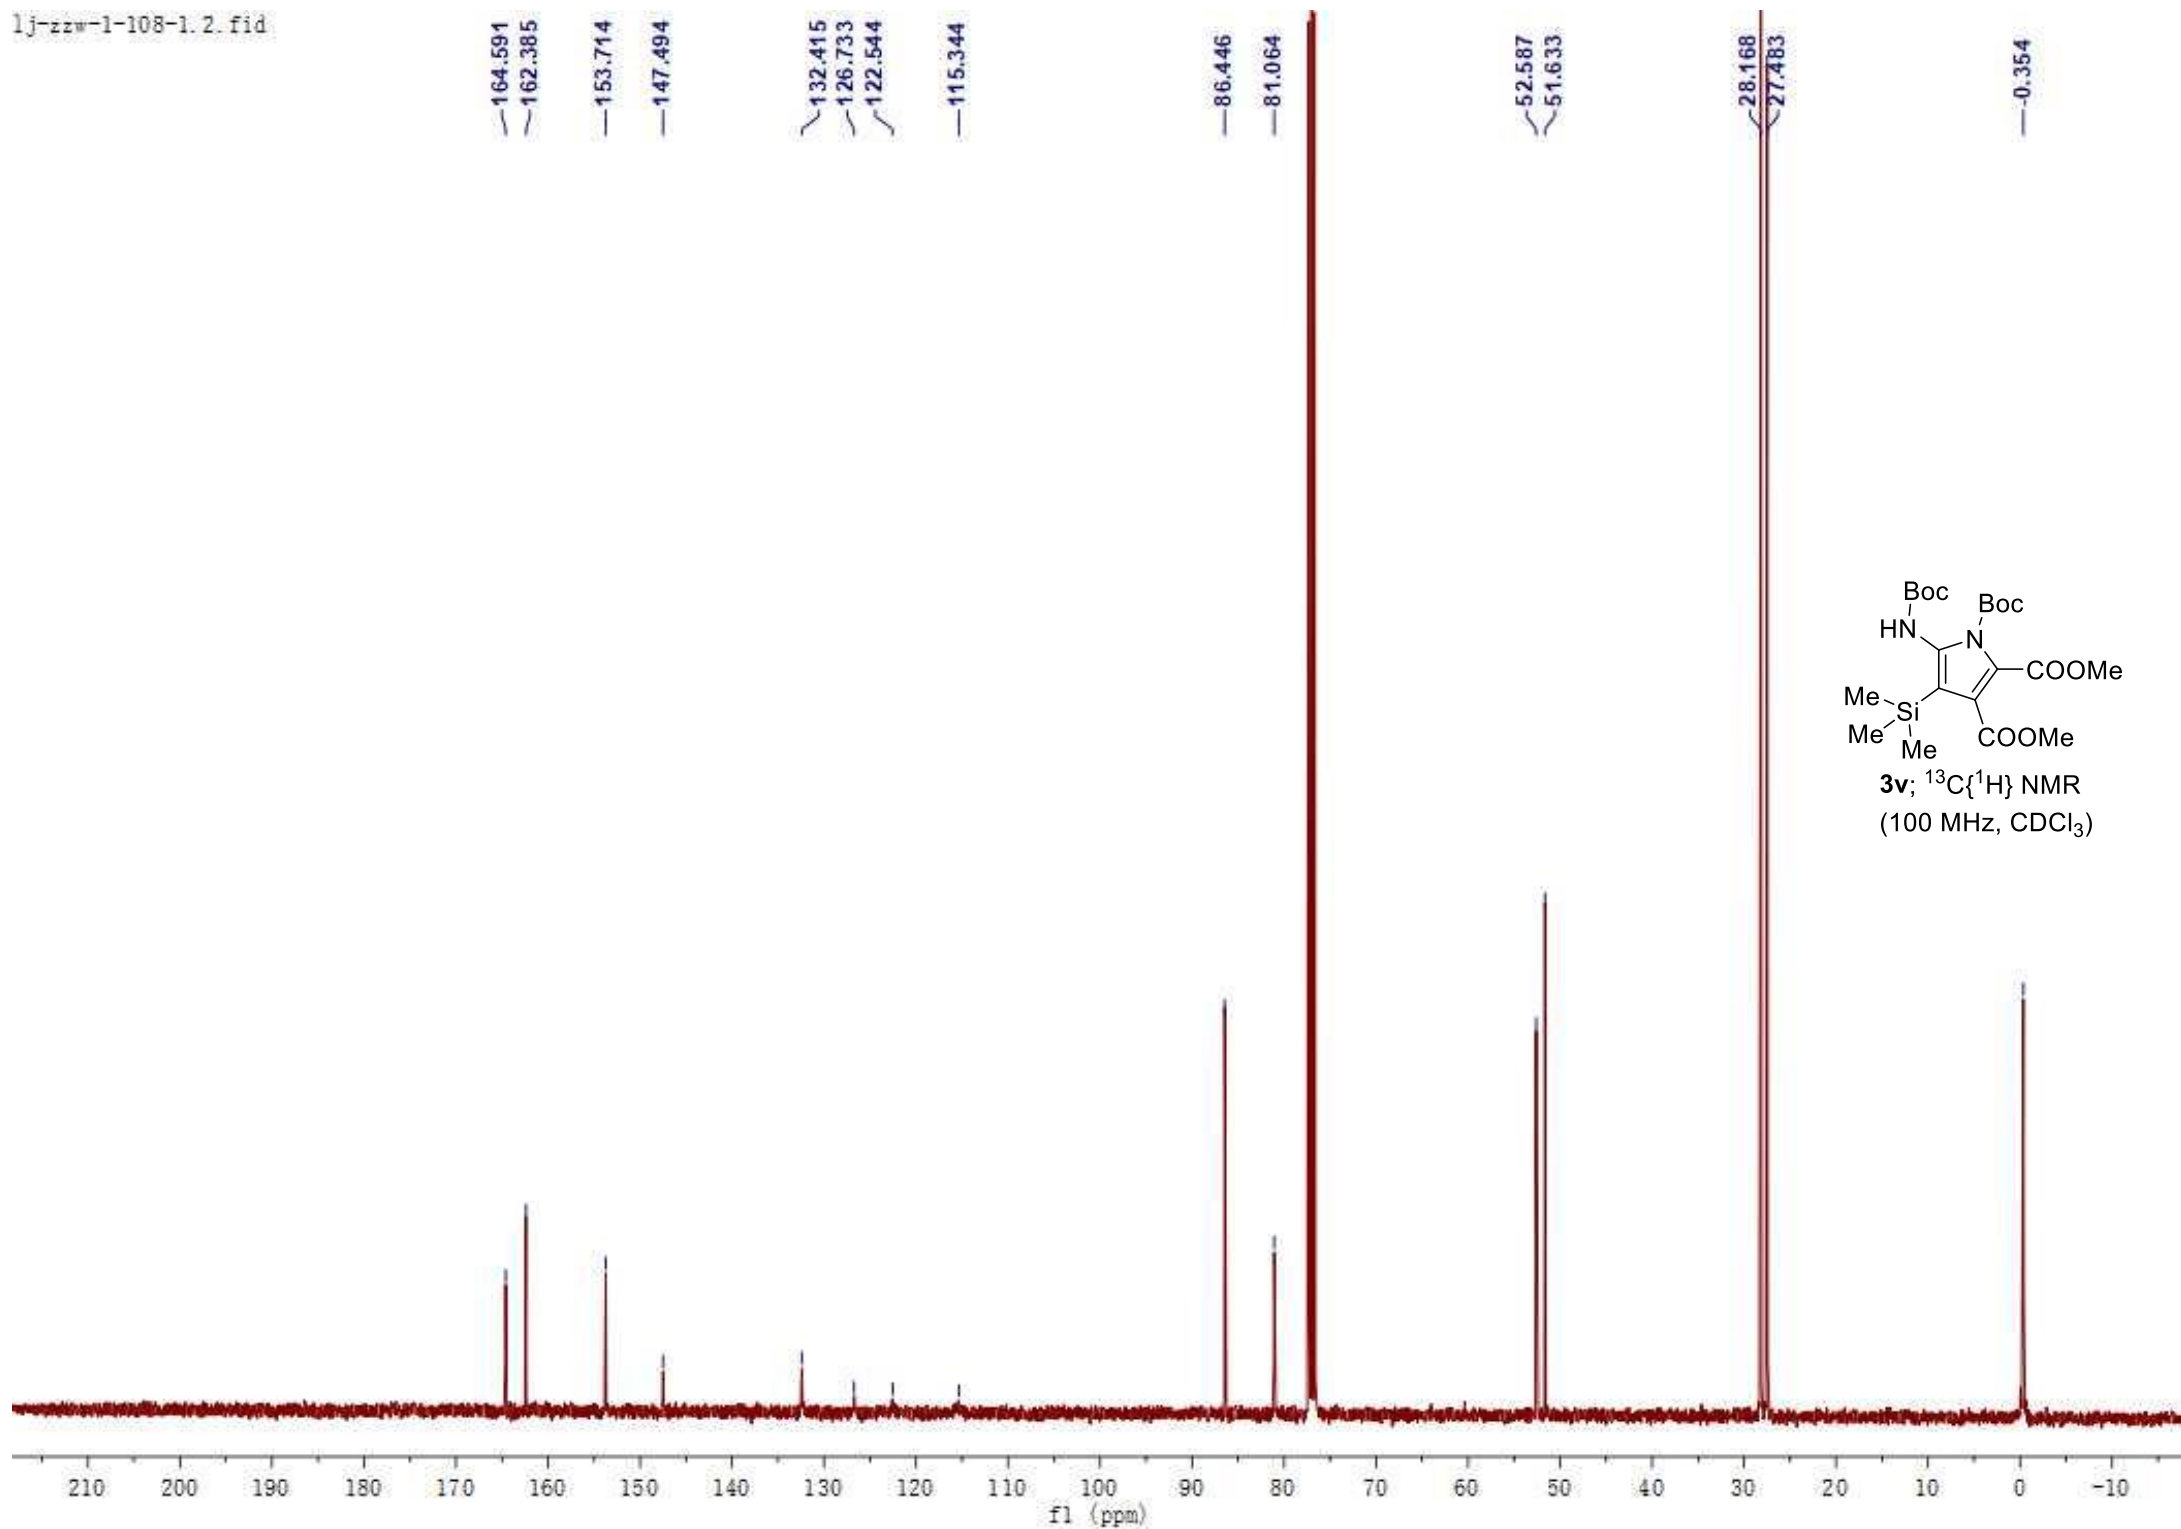

lj-zzw-1-132-1.1.1.1r

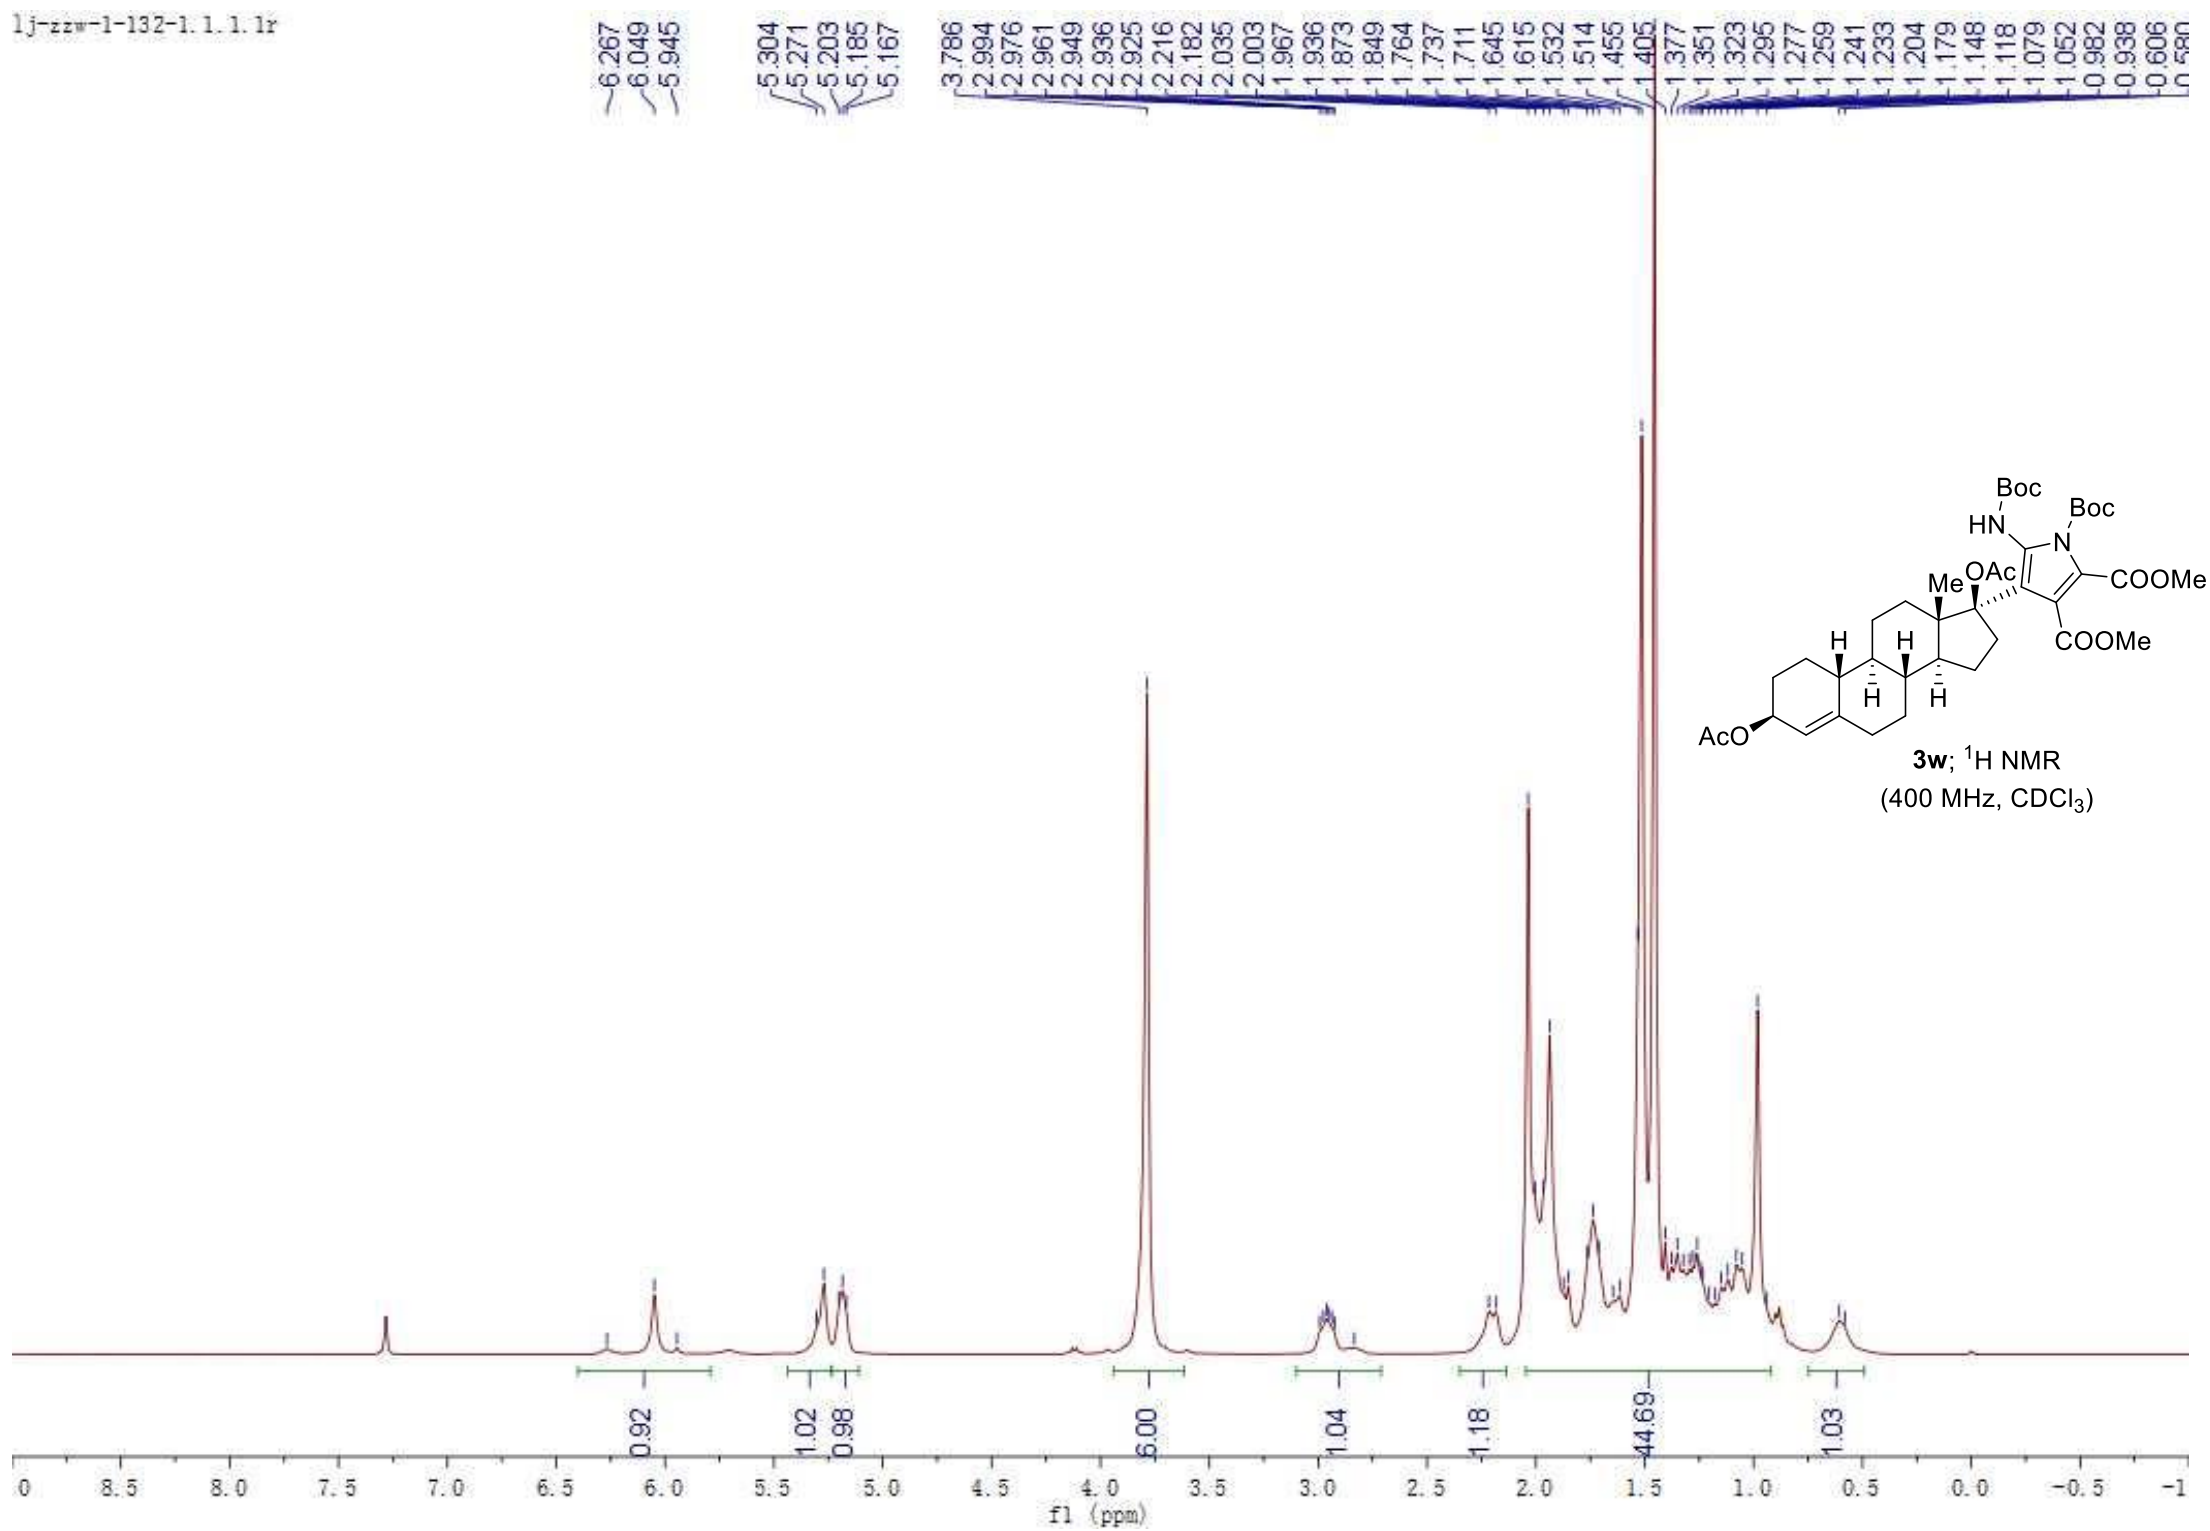

170.814  
169.945  
165.857  
159.923  
154.326

147.066  
144.899

125.385  
122.298  
121.881  
121.692  
119.567

90.177  
85.704  
81.046

70.423  
52.244  
52.142  
49.313  
48.128  
45.594  
41.687  
41.329  
35.702  
34.976  
33.158  
31.206  
28.329  
27.664  
27.512  
27.237  
25.726  
24.848  
24.274  
21.502  
21.379  
14.664

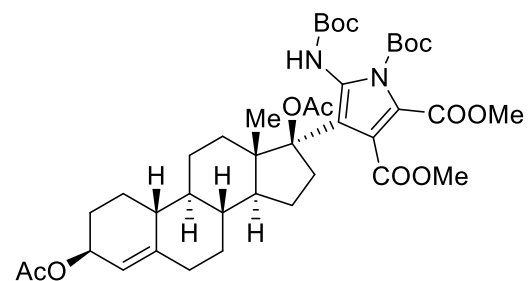

**3w**;  $^{13}\text{C}\{^1\text{H}\}$  NMR  
(100 MHz,  $\text{CDCl}_3$ )

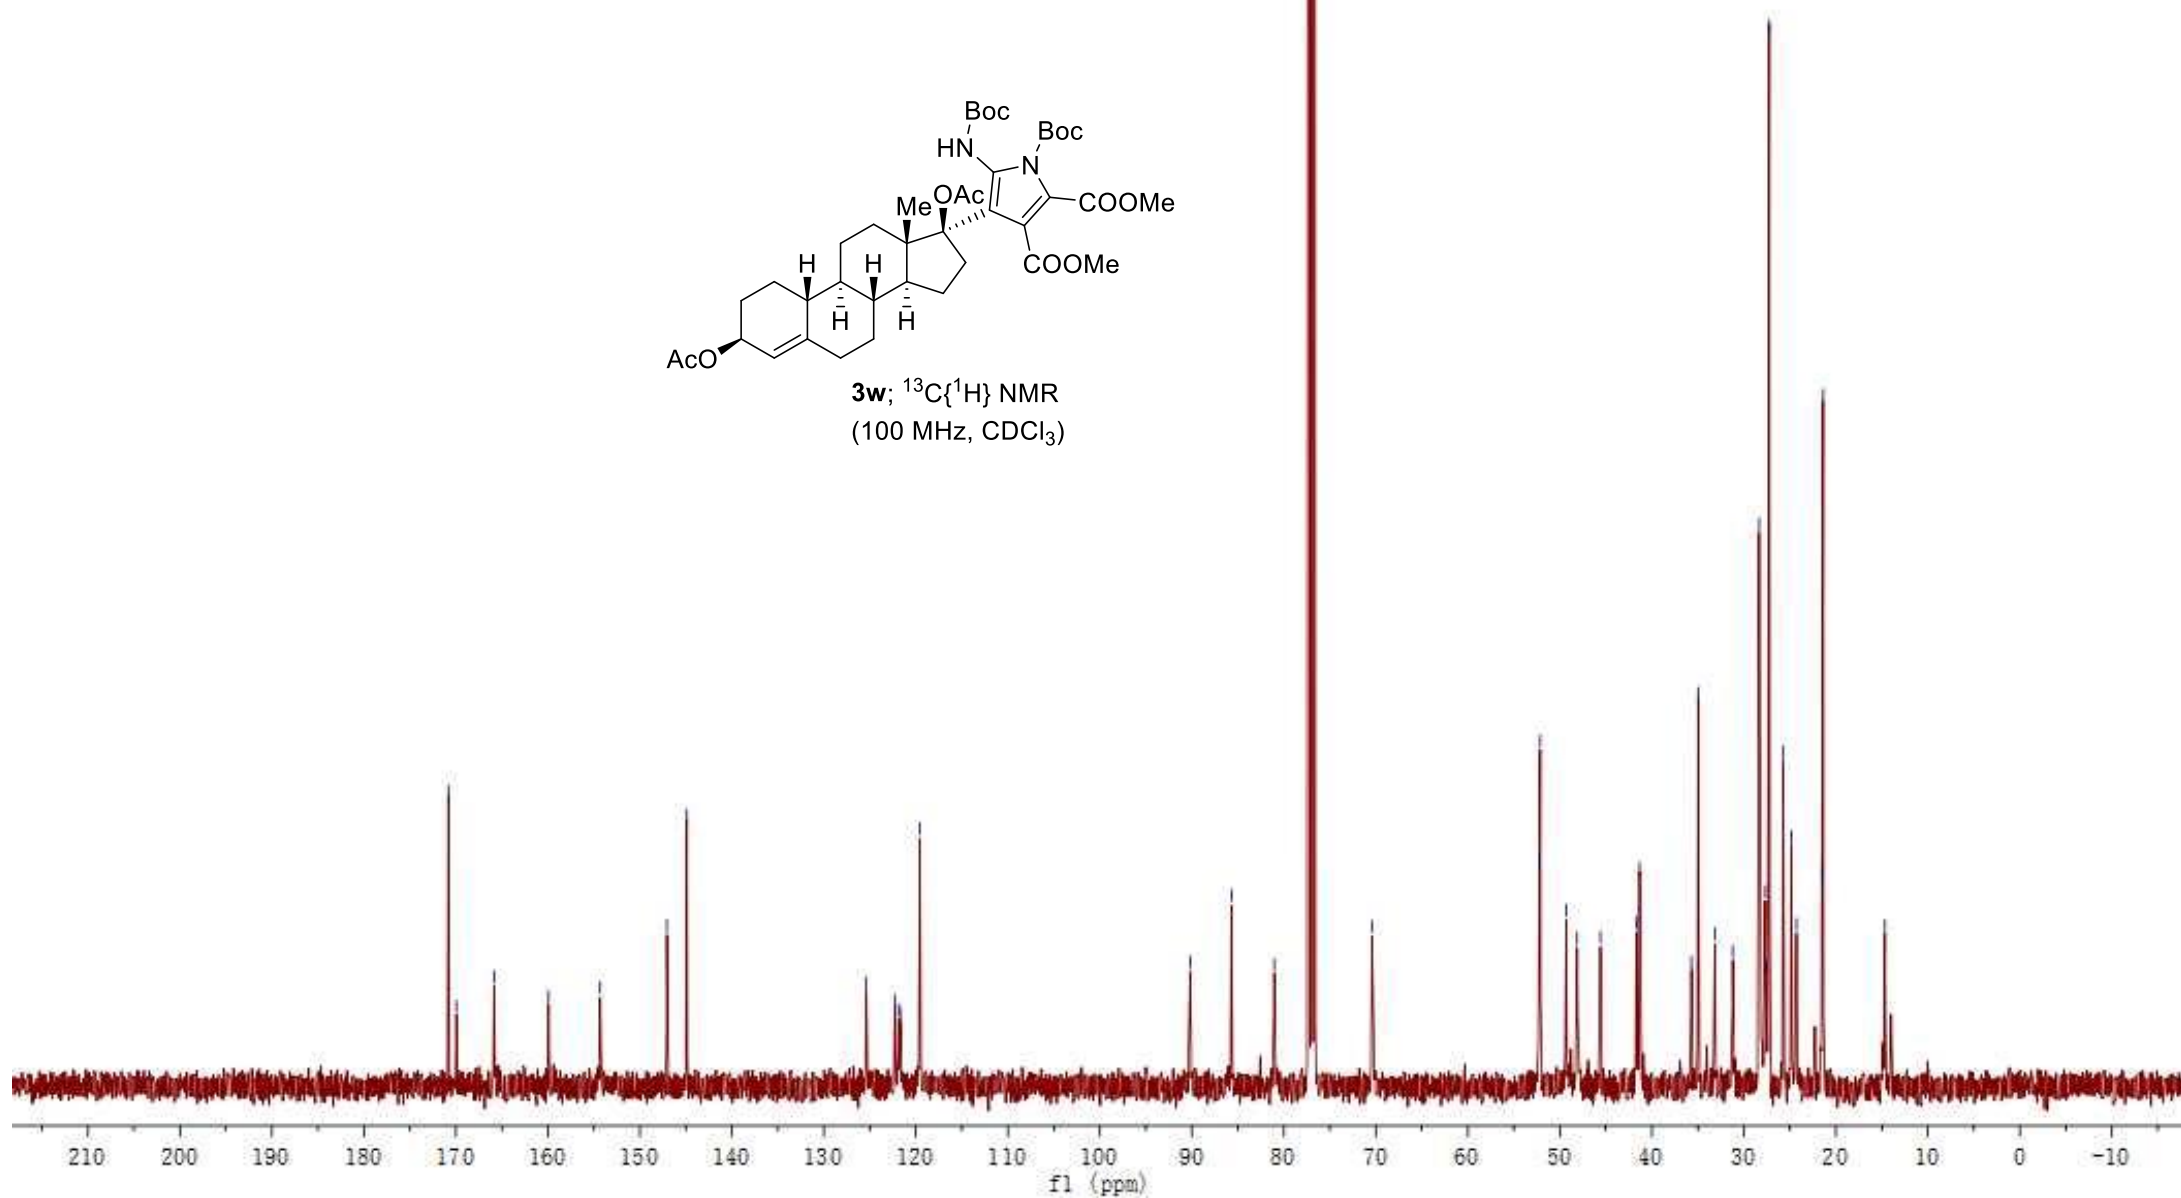

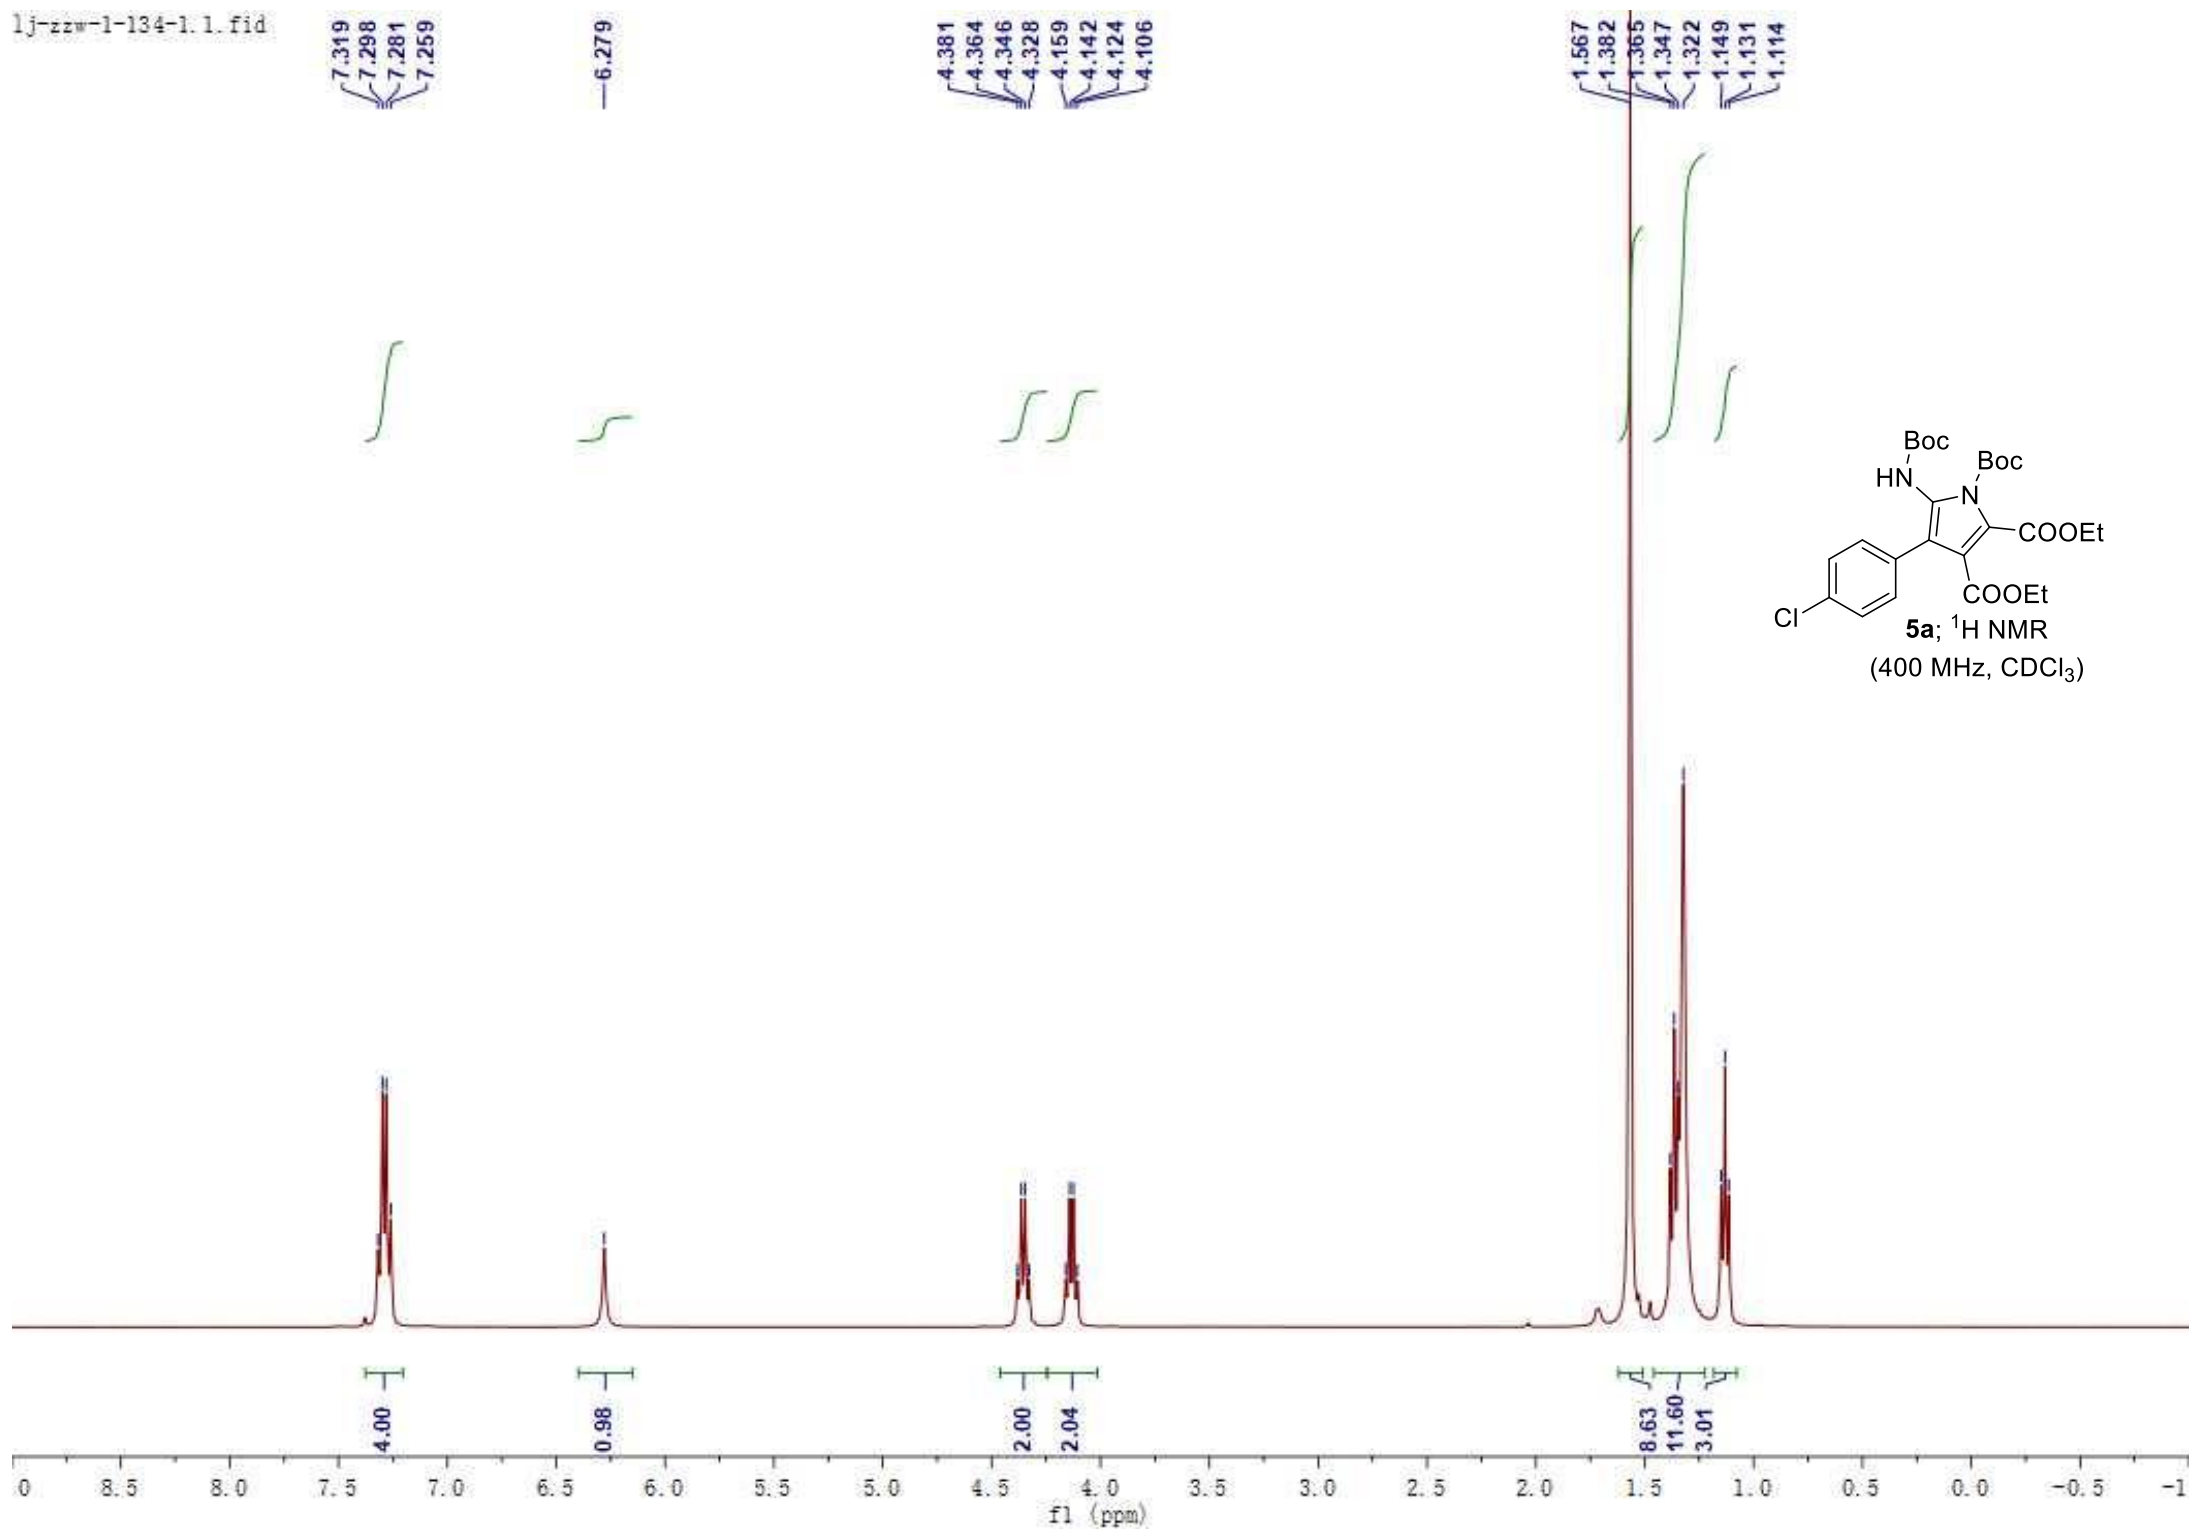

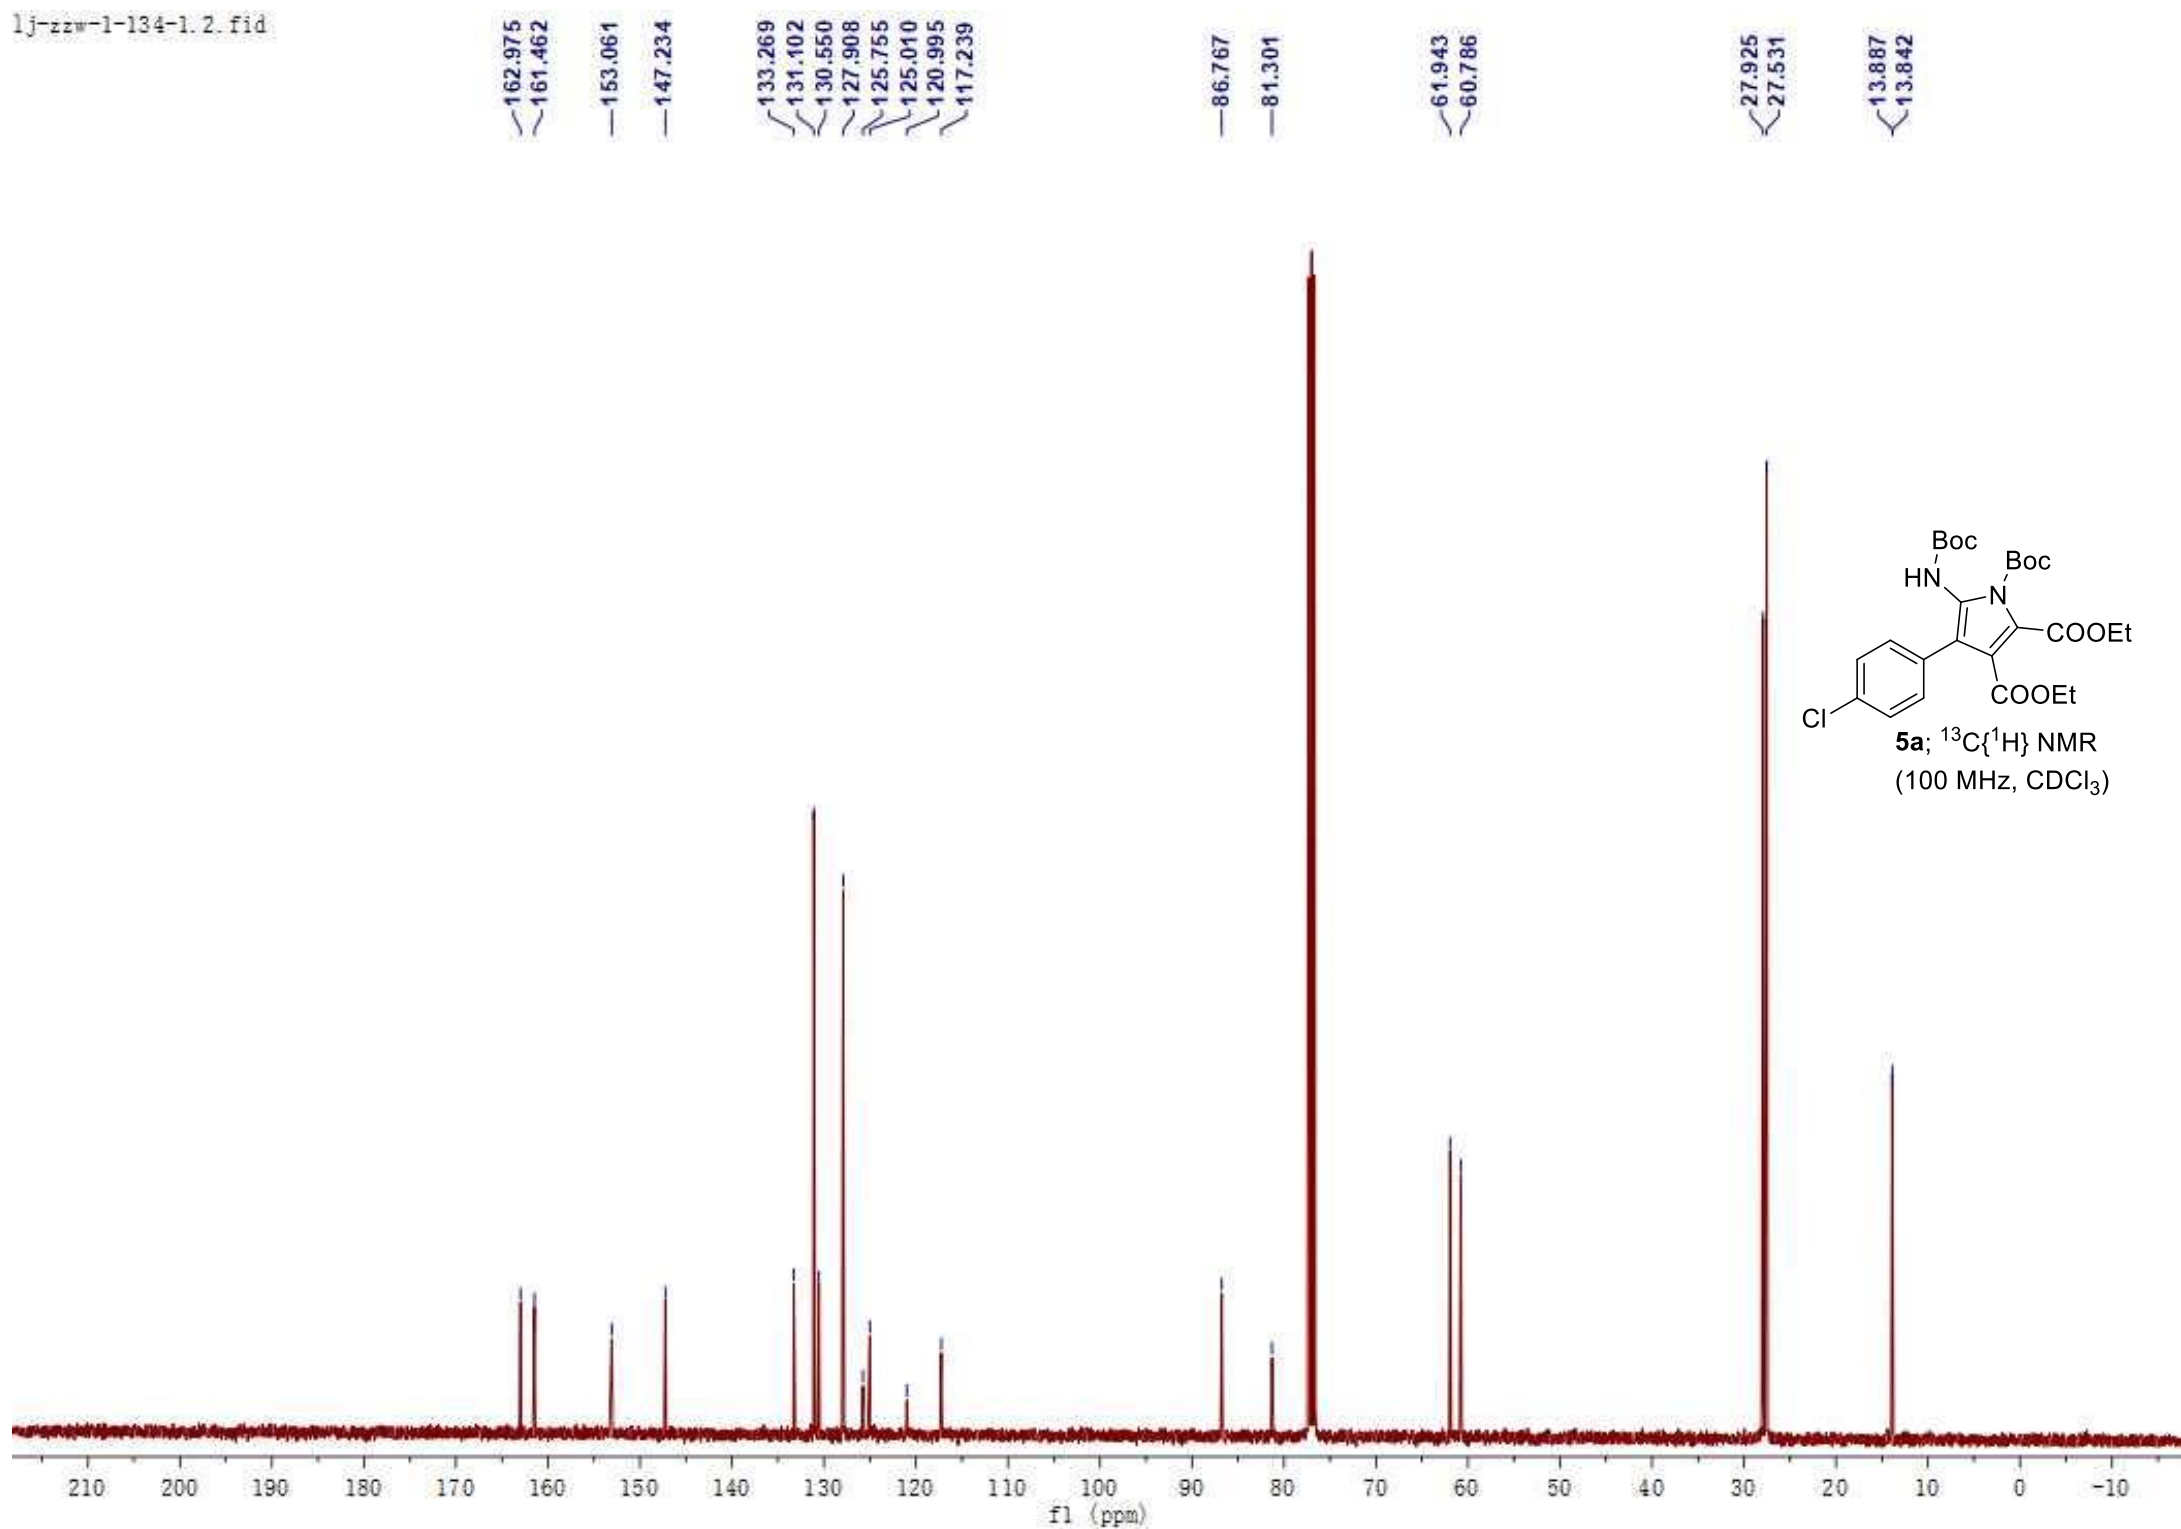

lj-zzw-1-157-1.2.fid

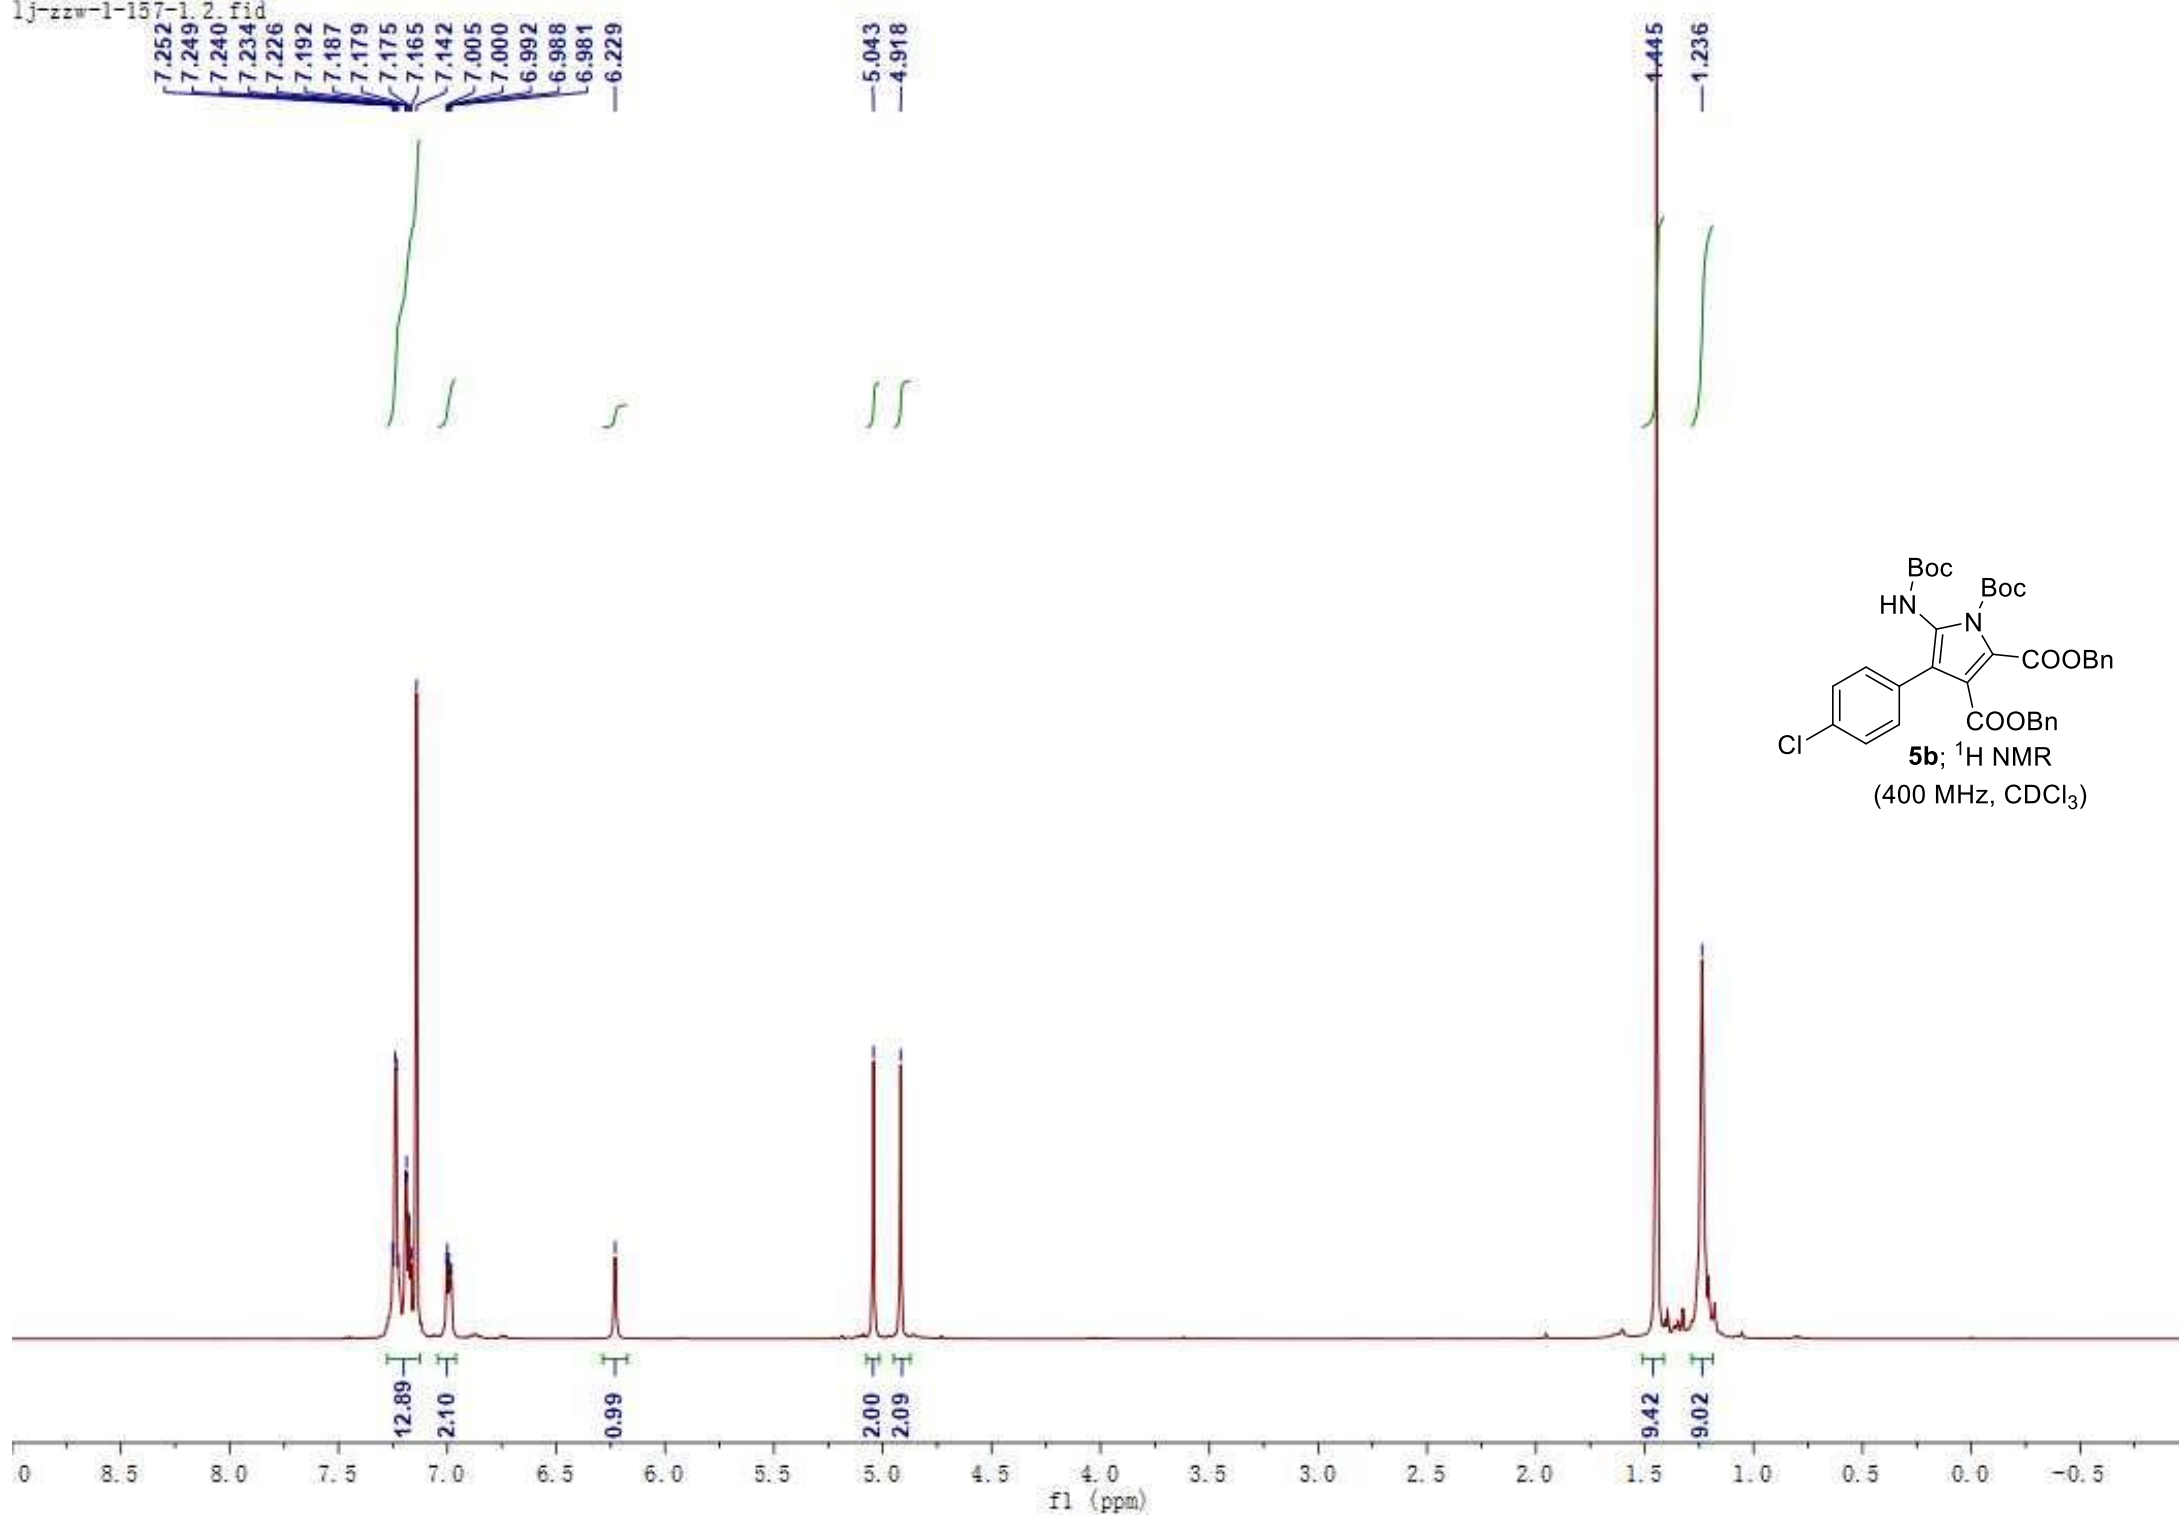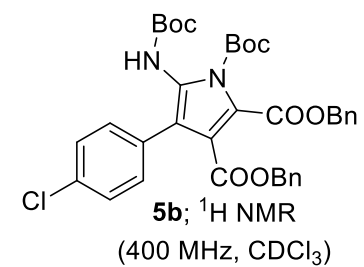

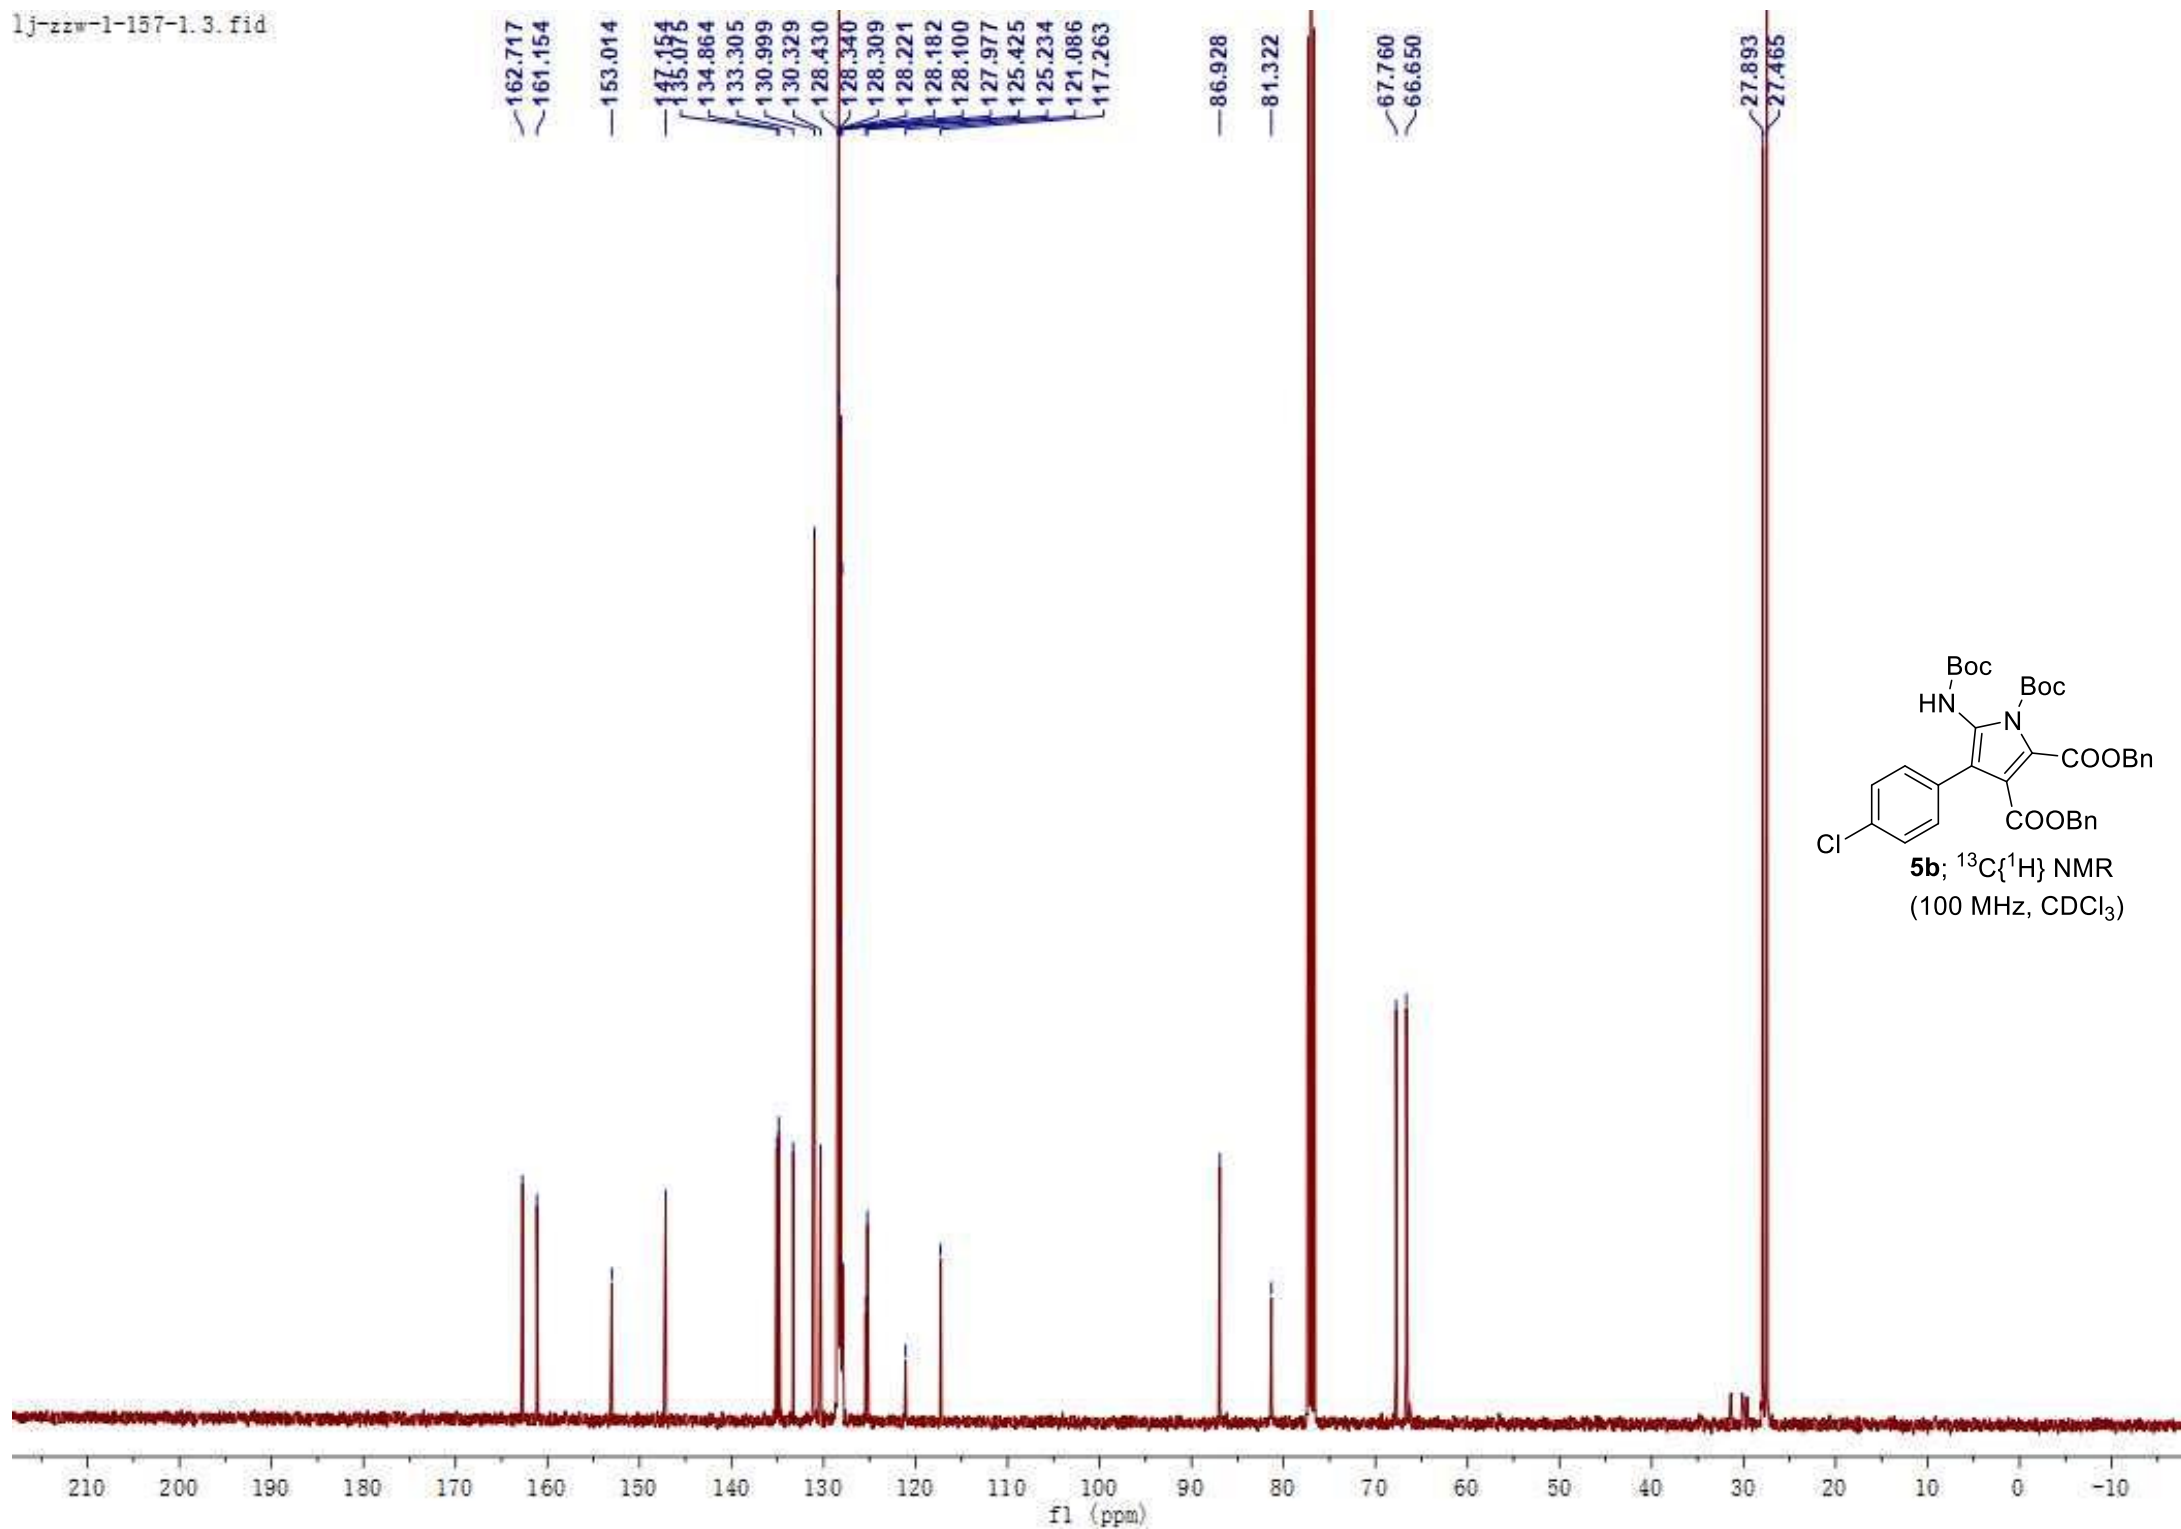



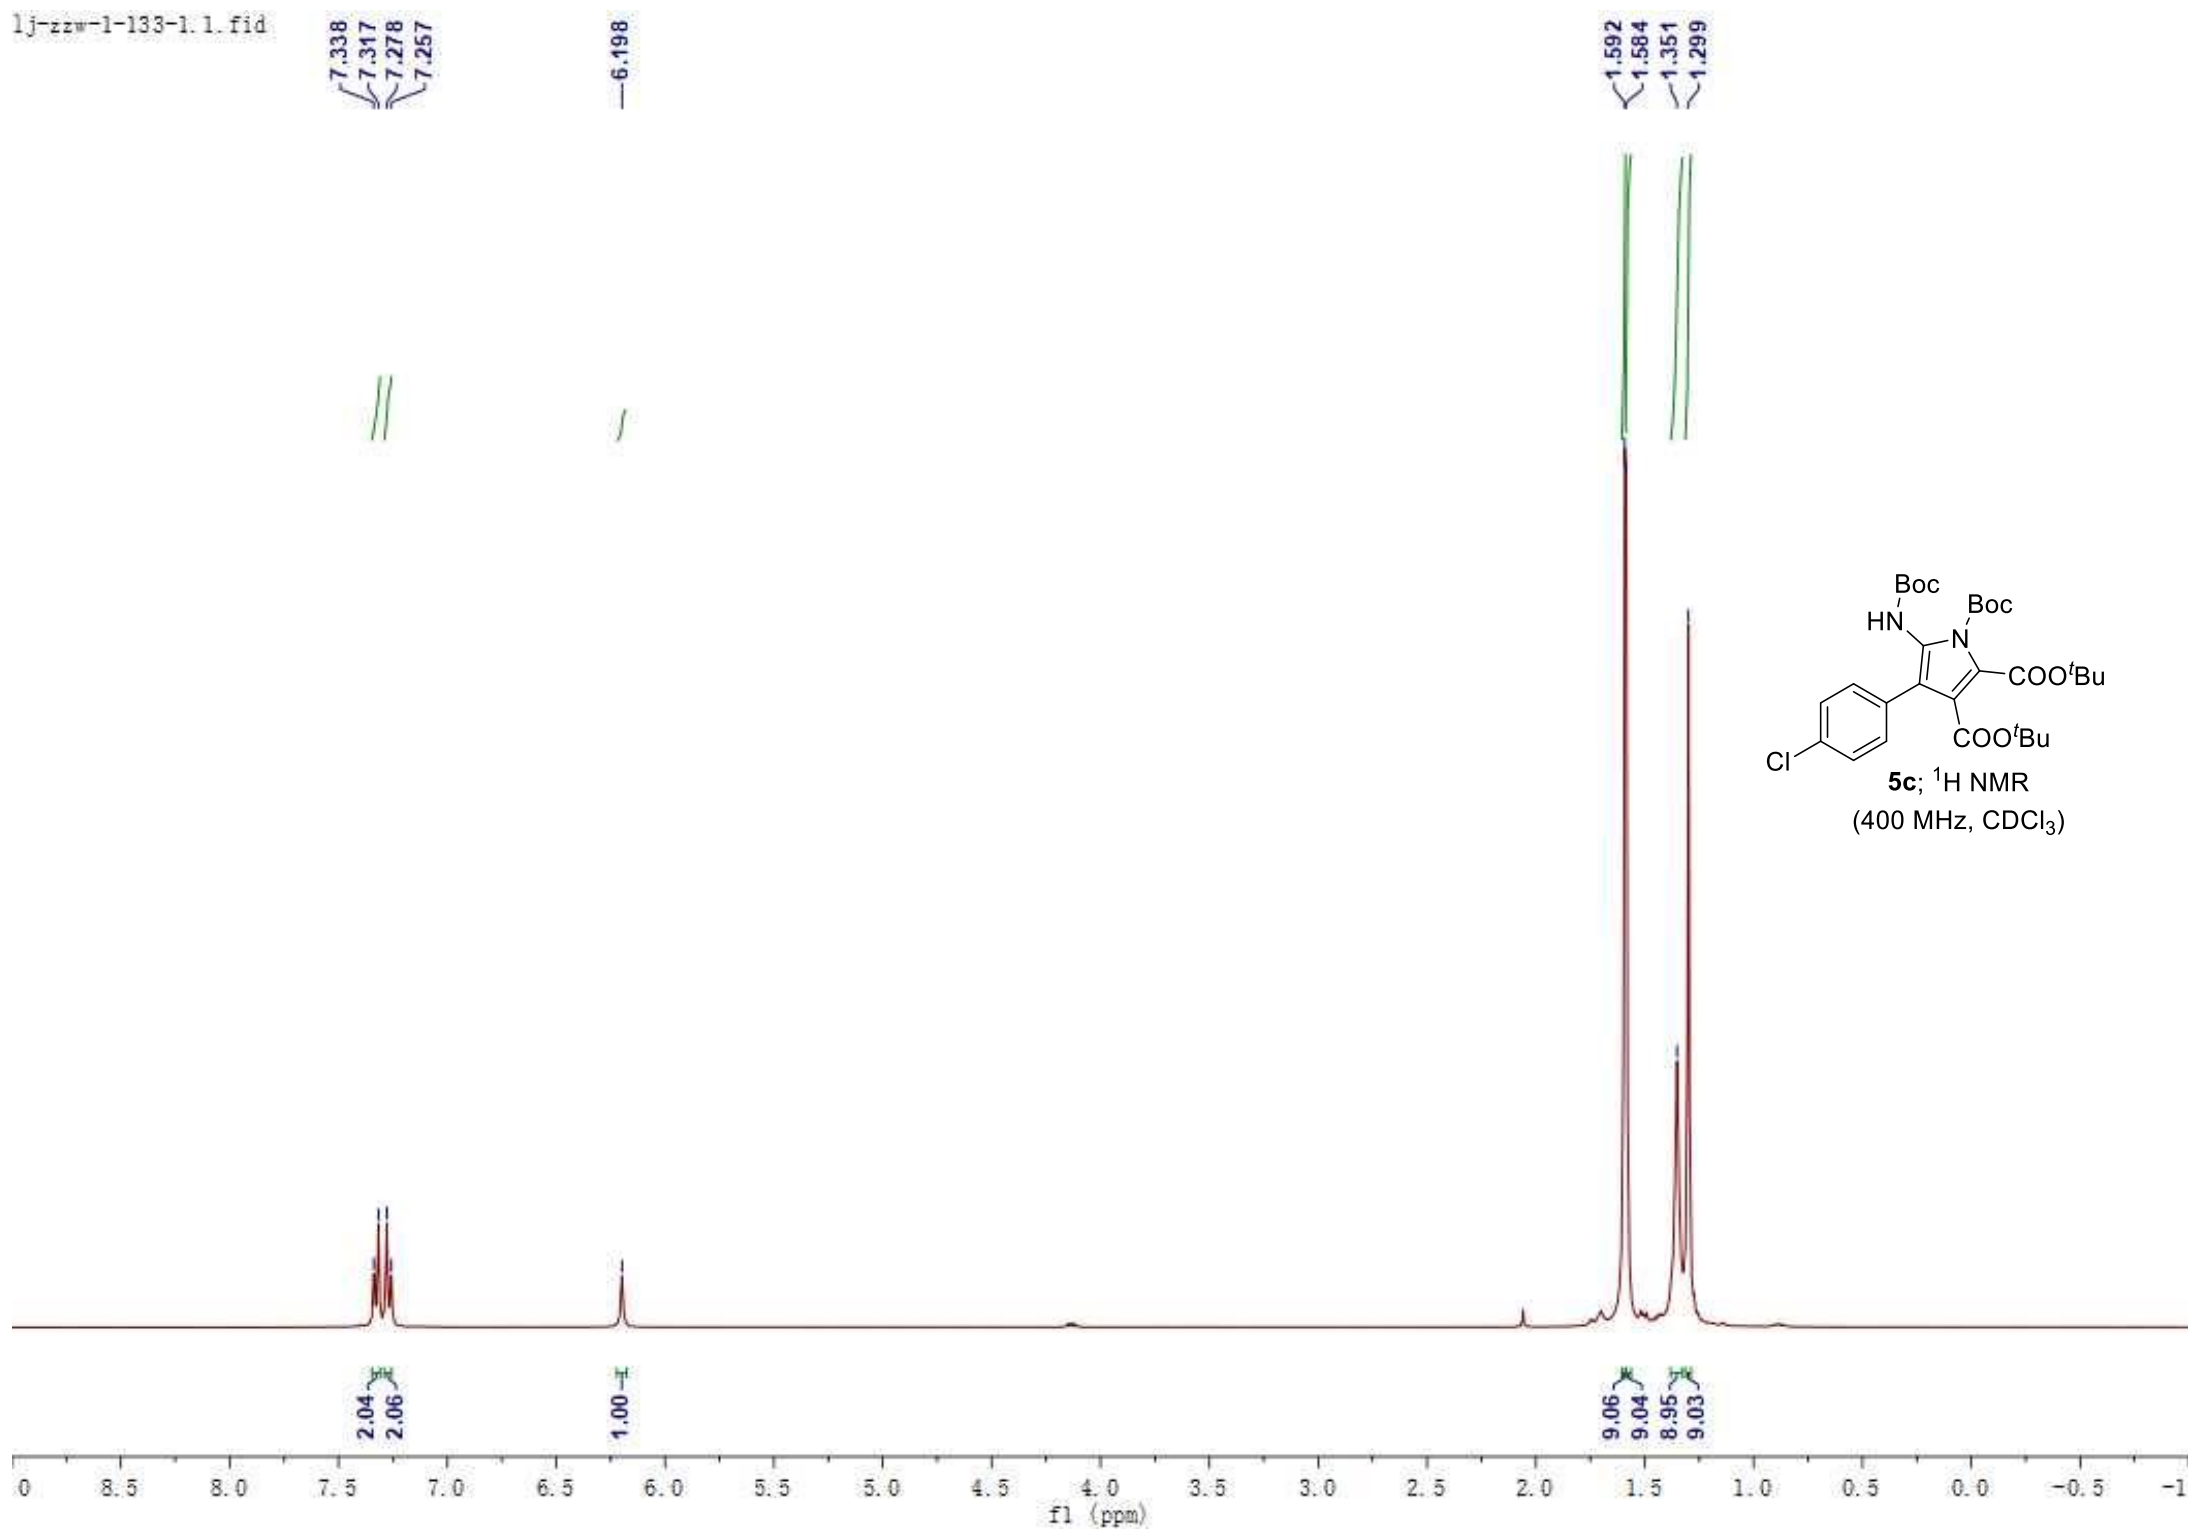

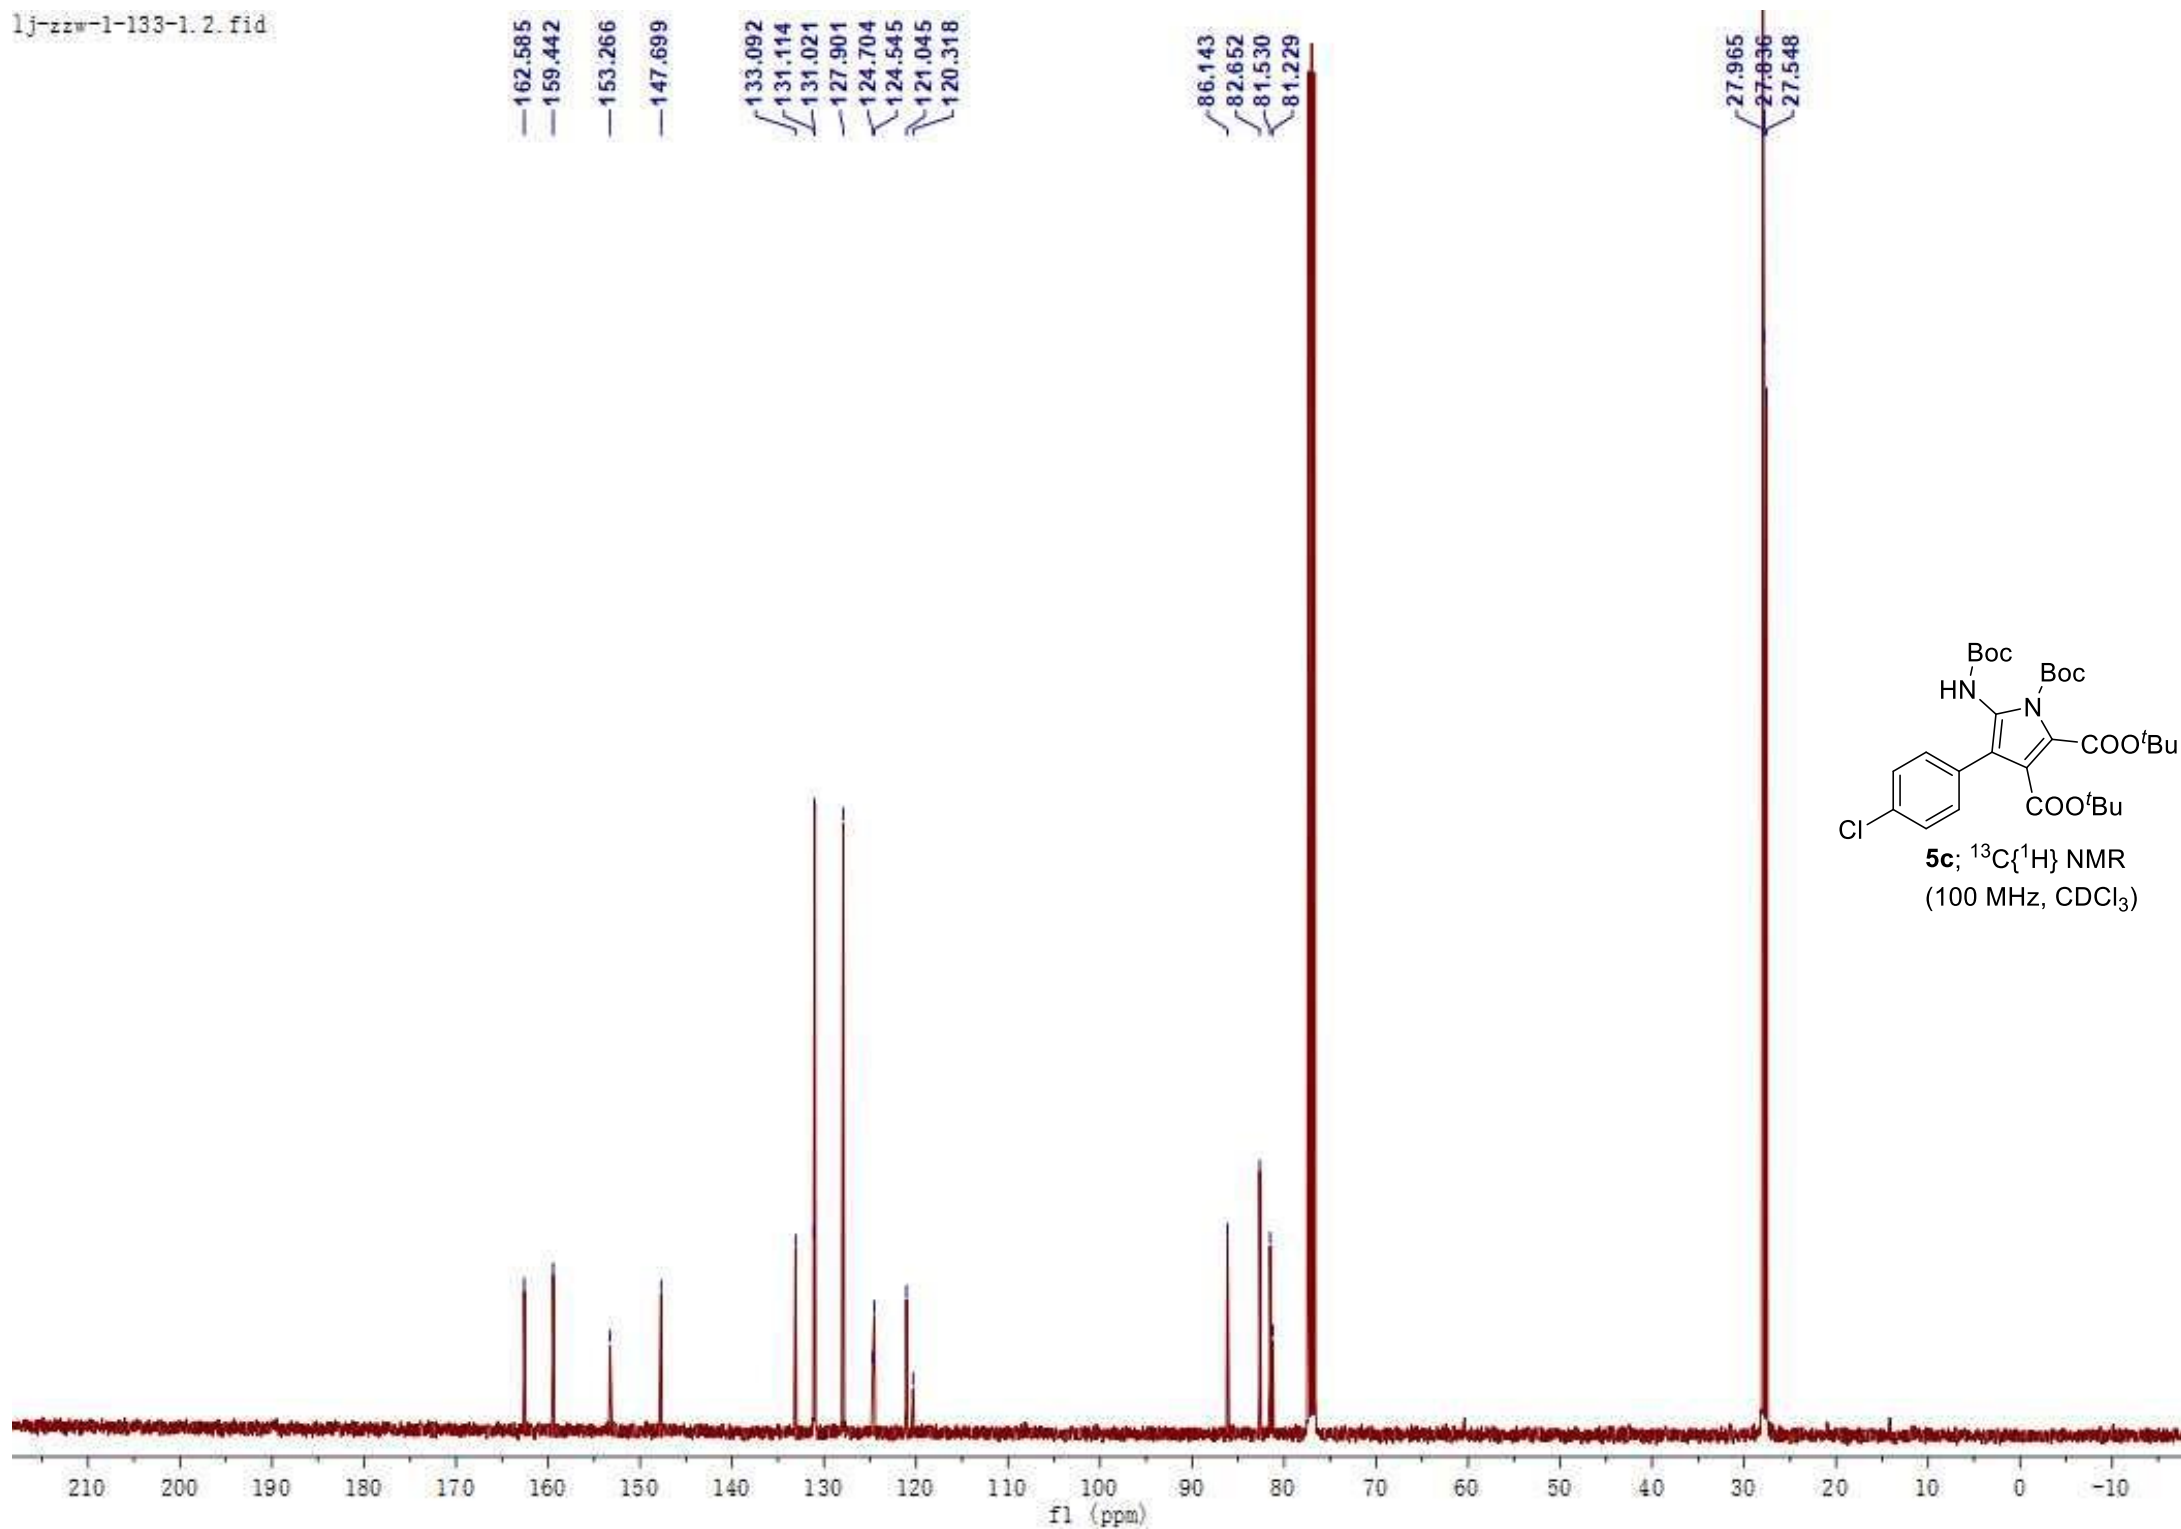

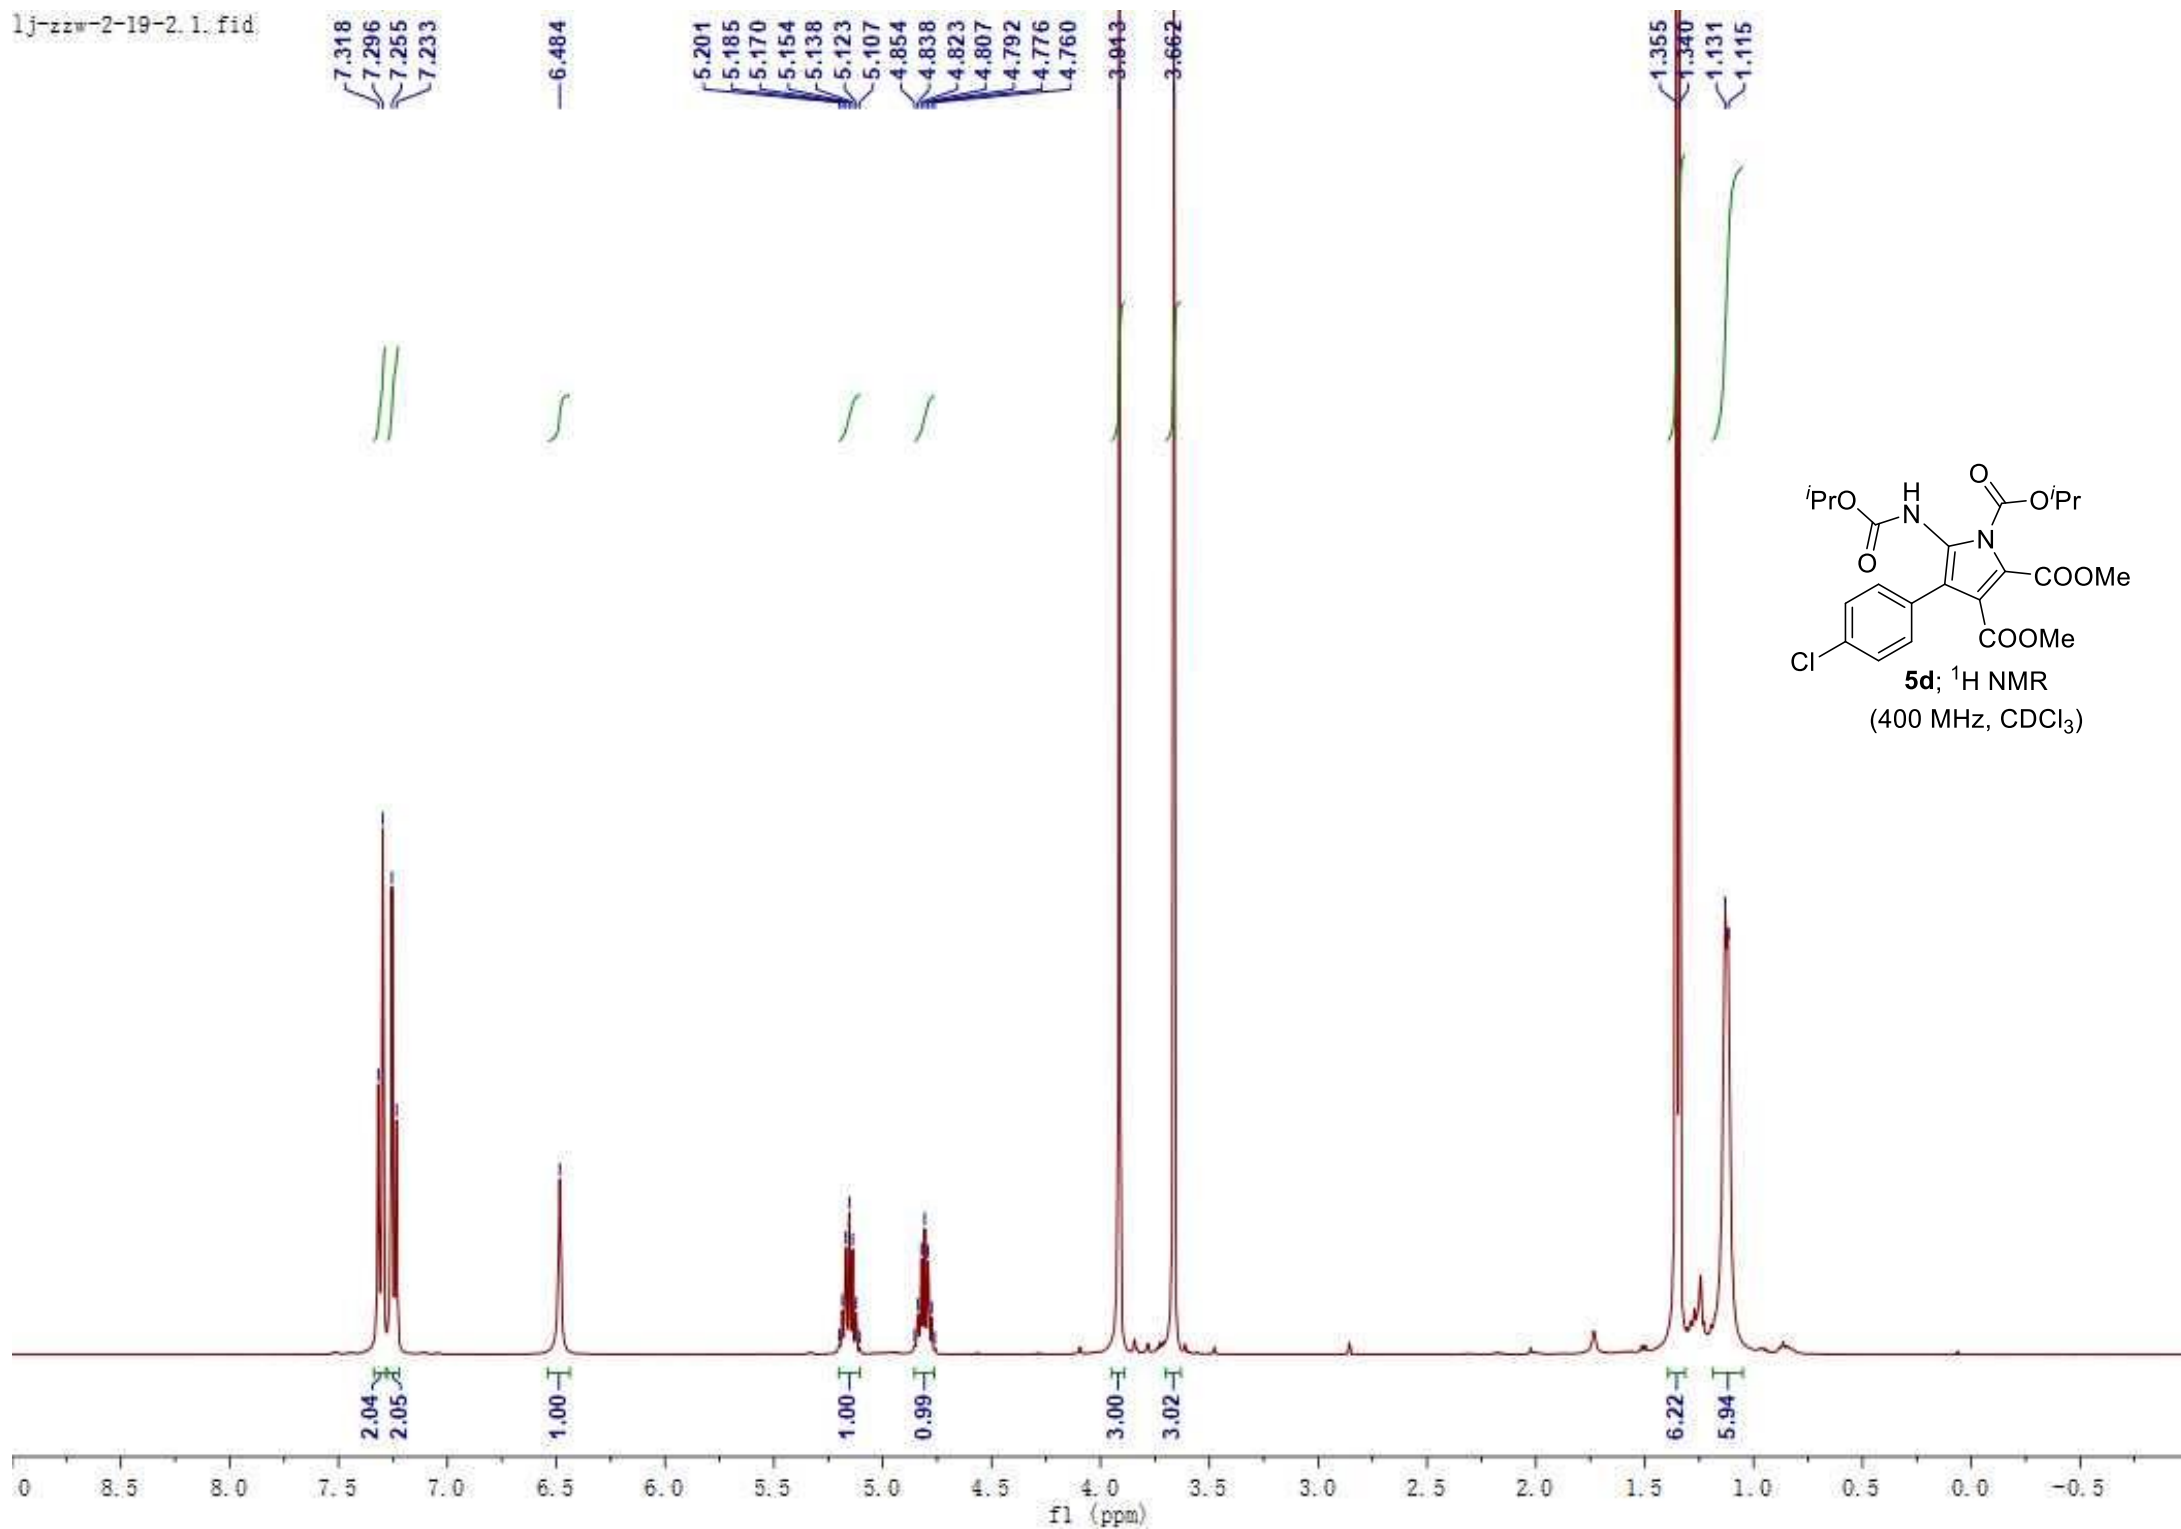

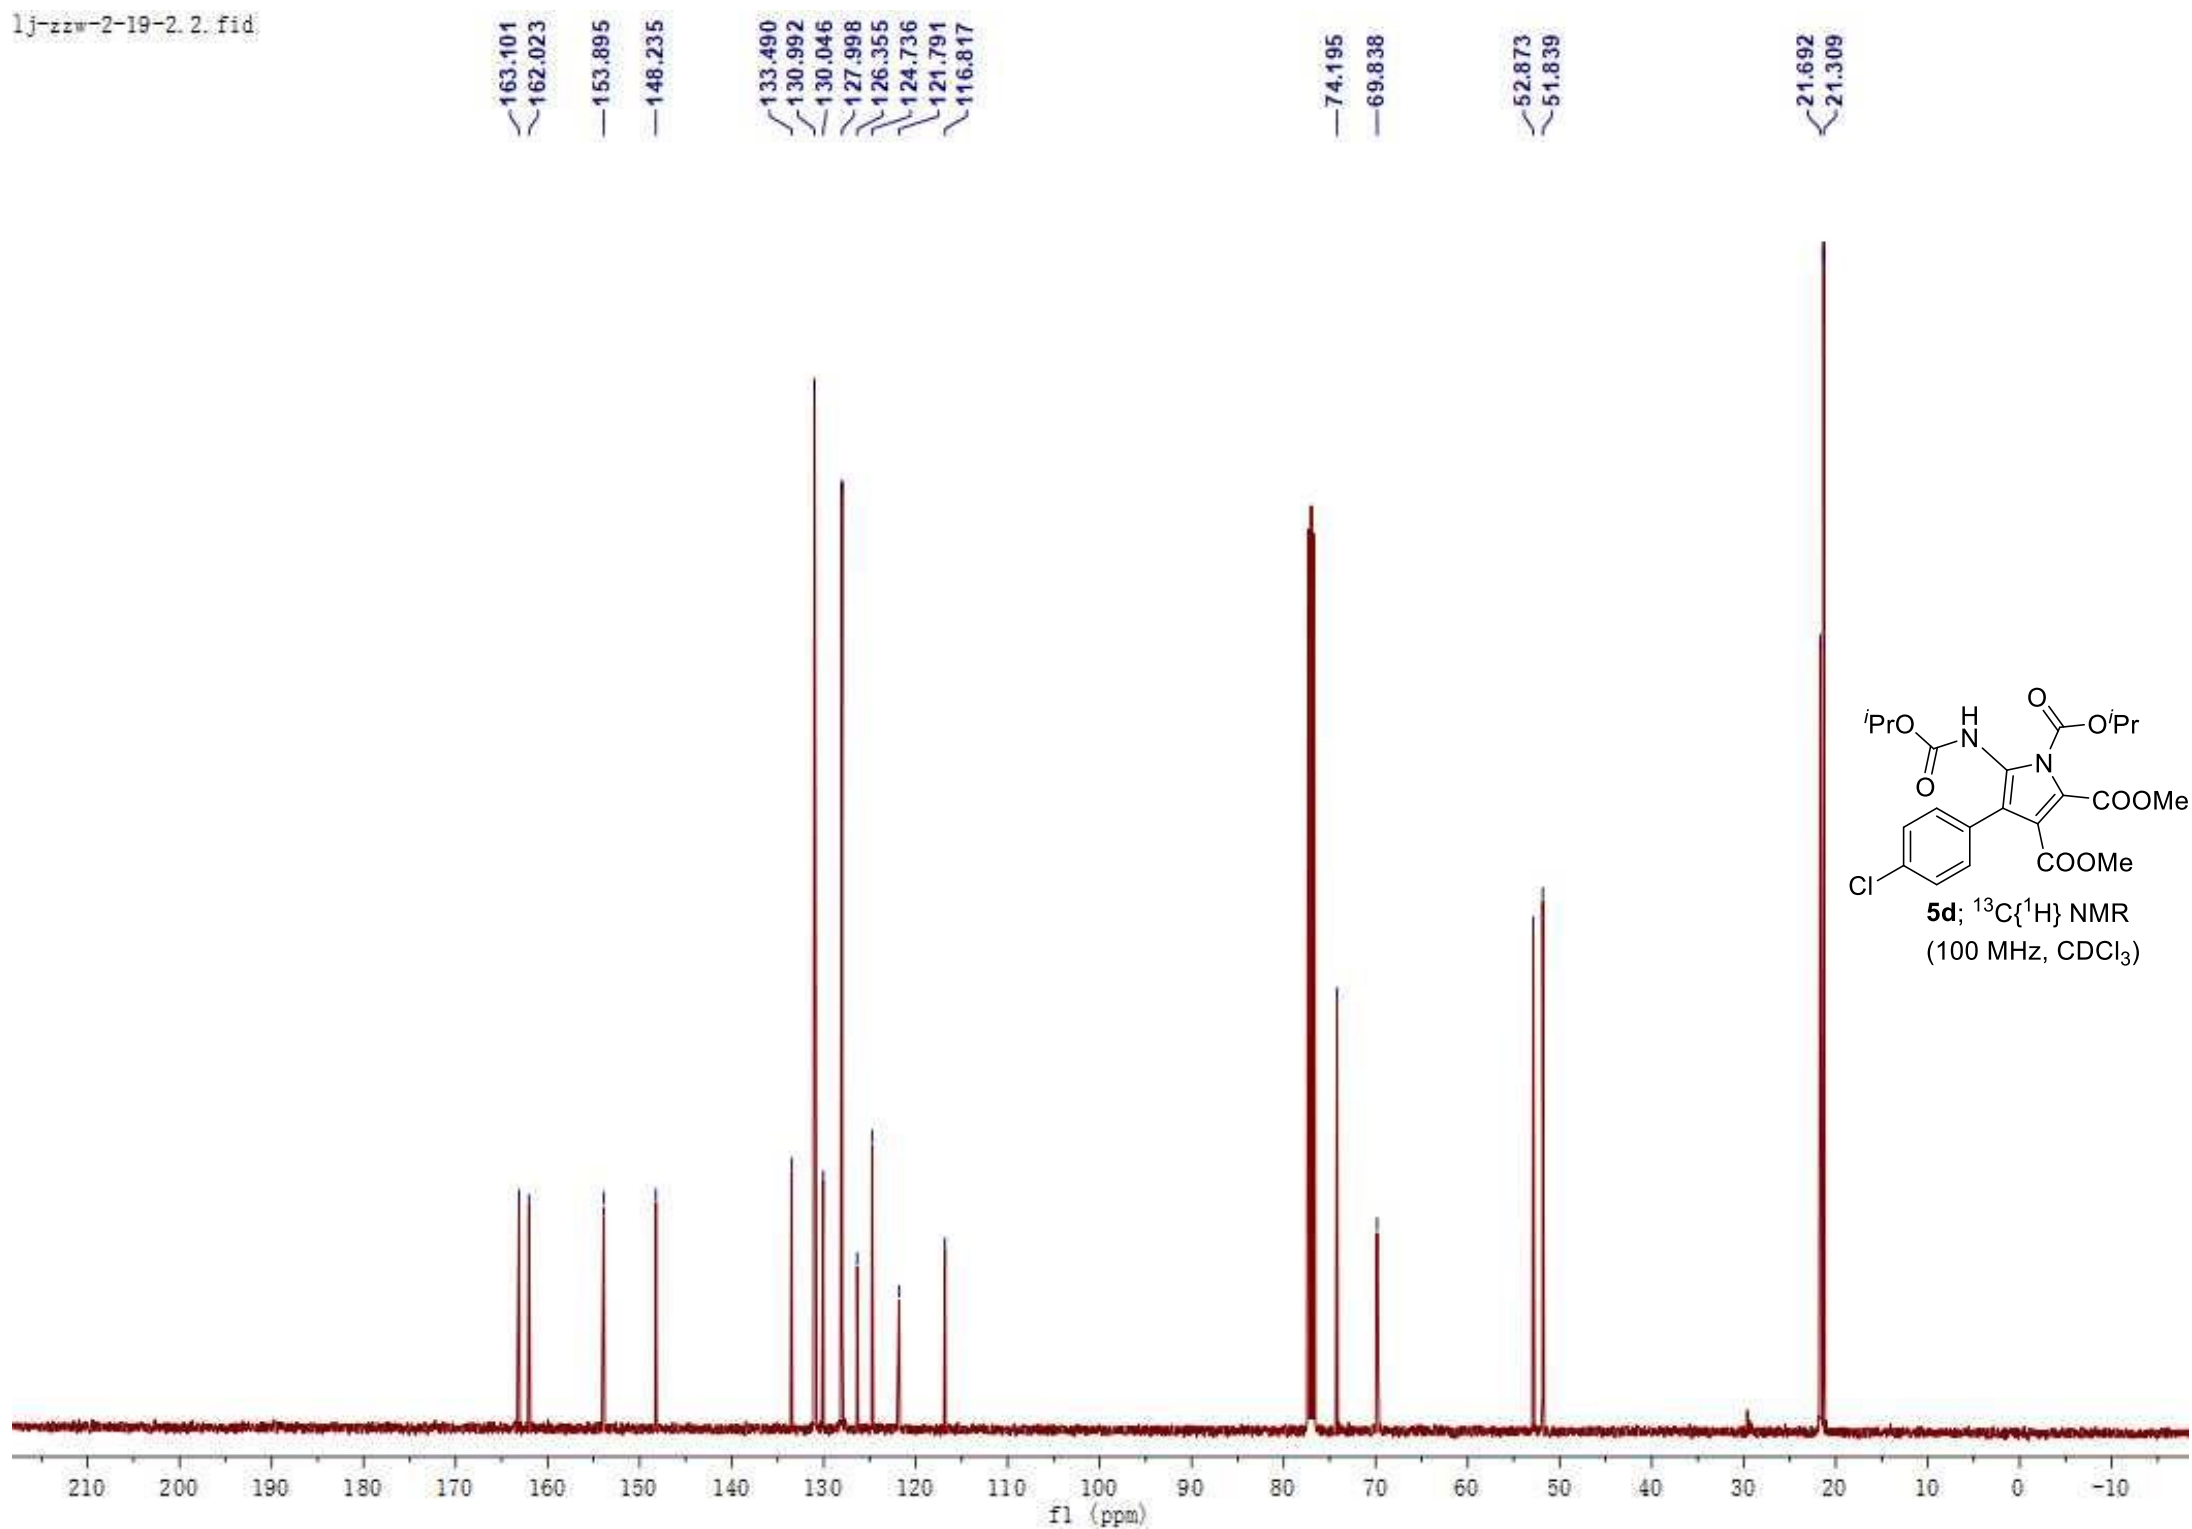

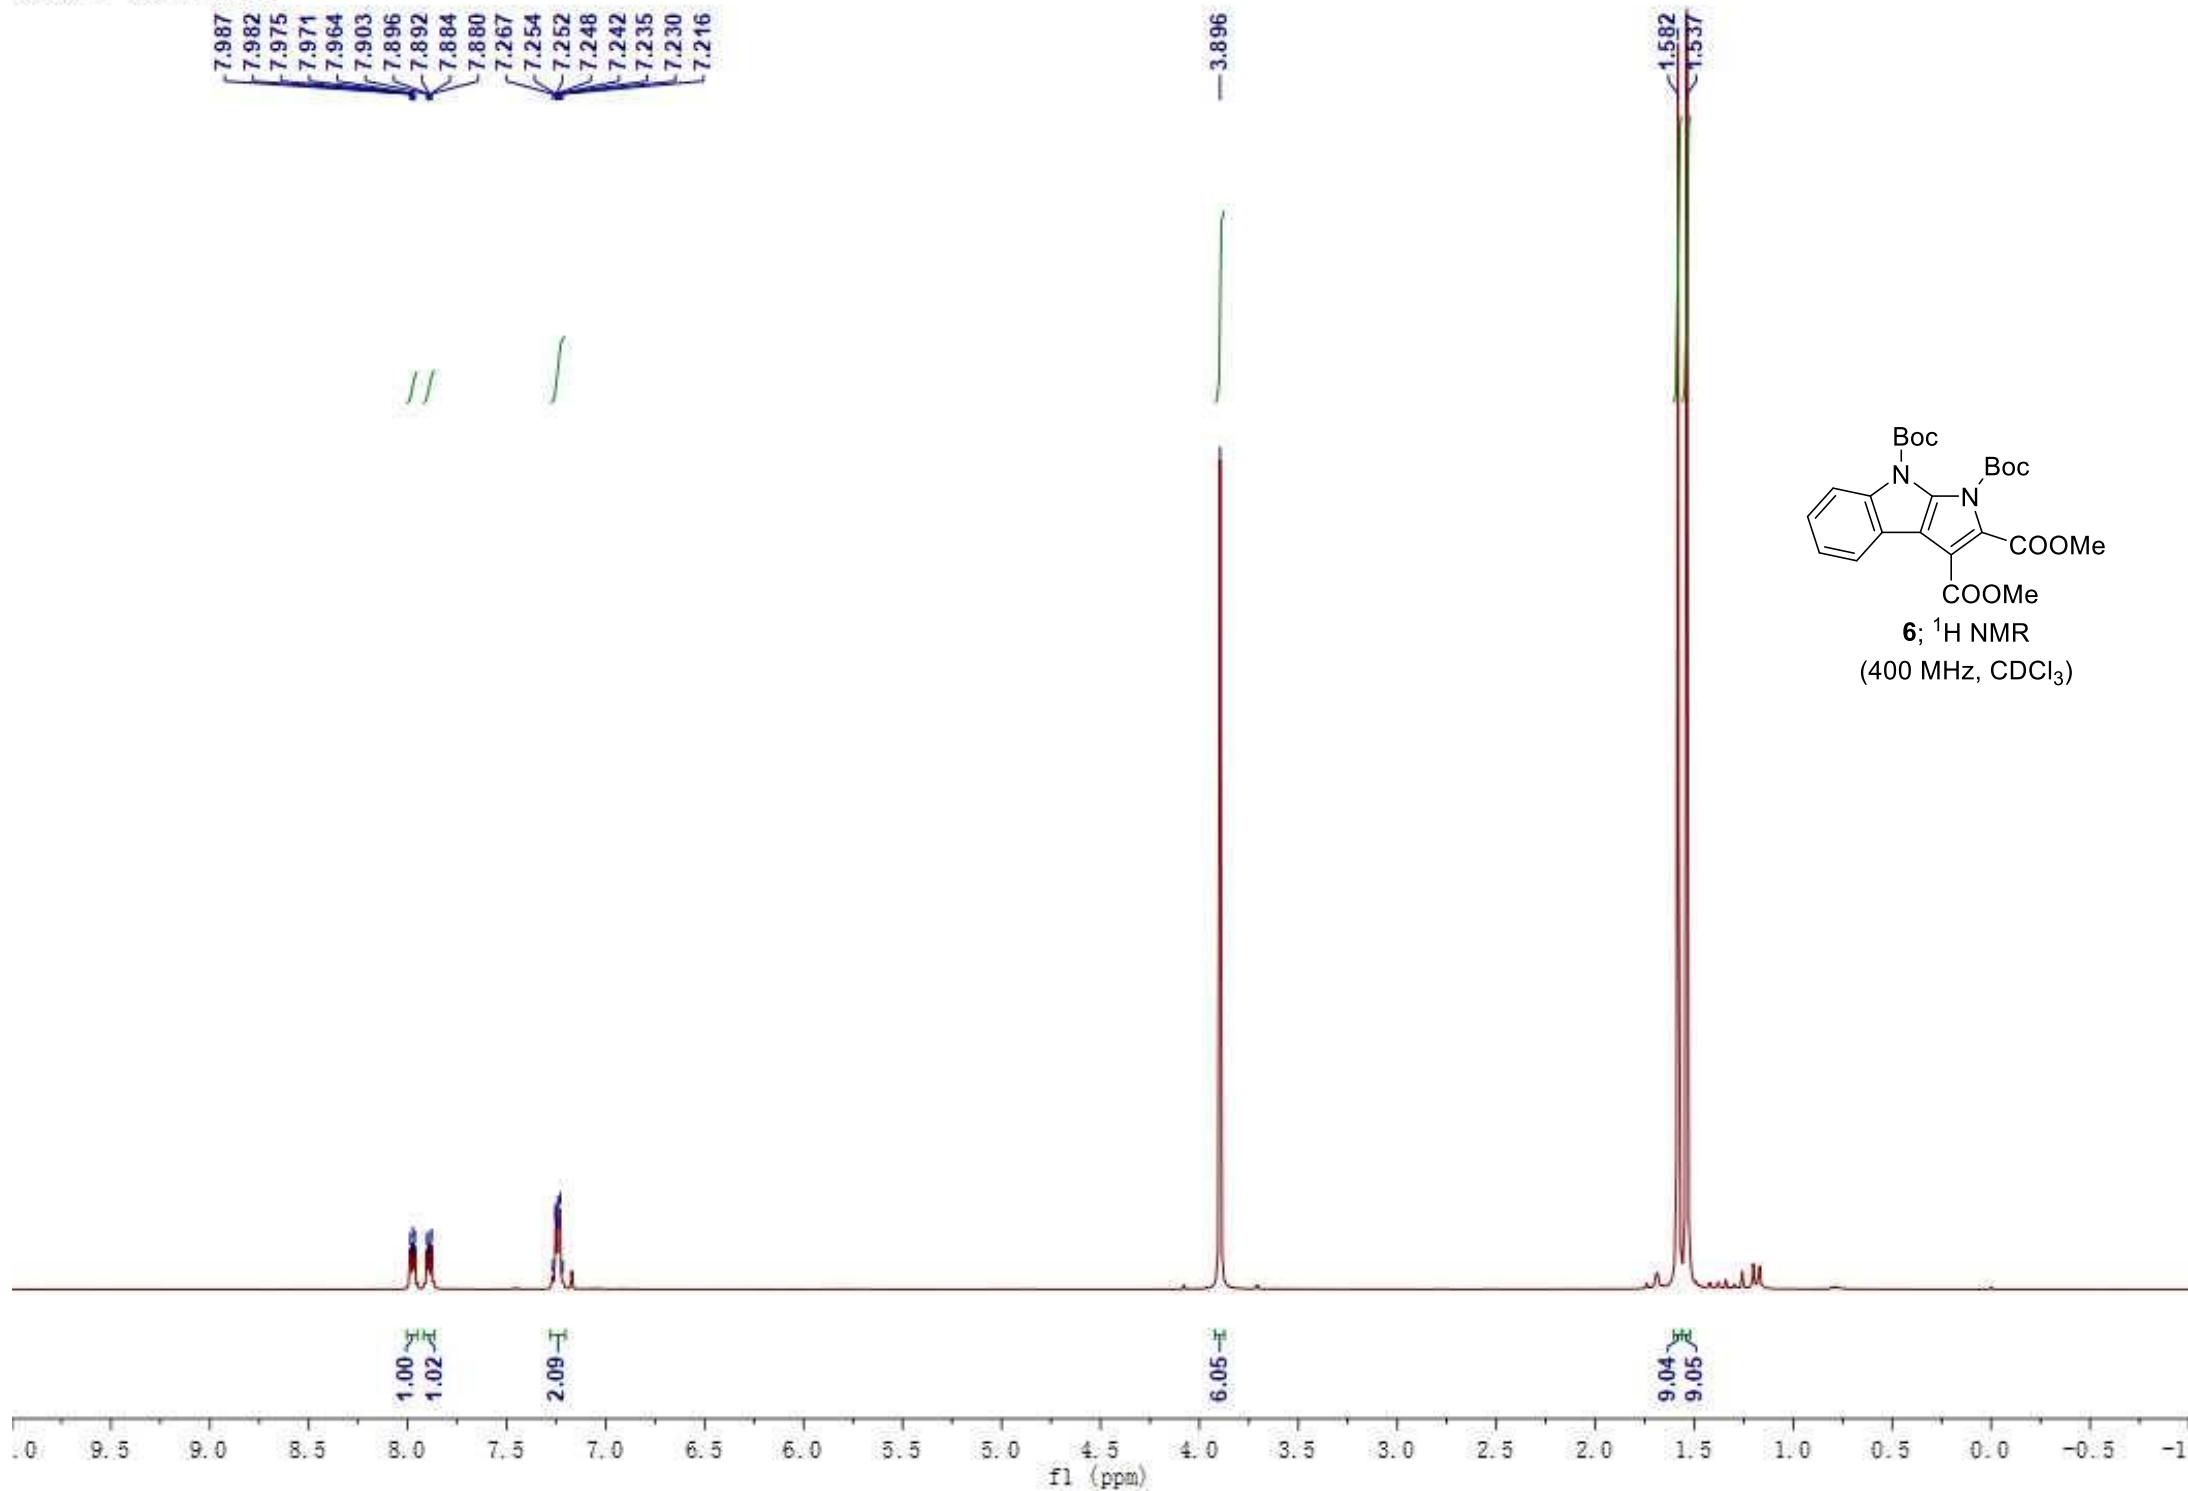

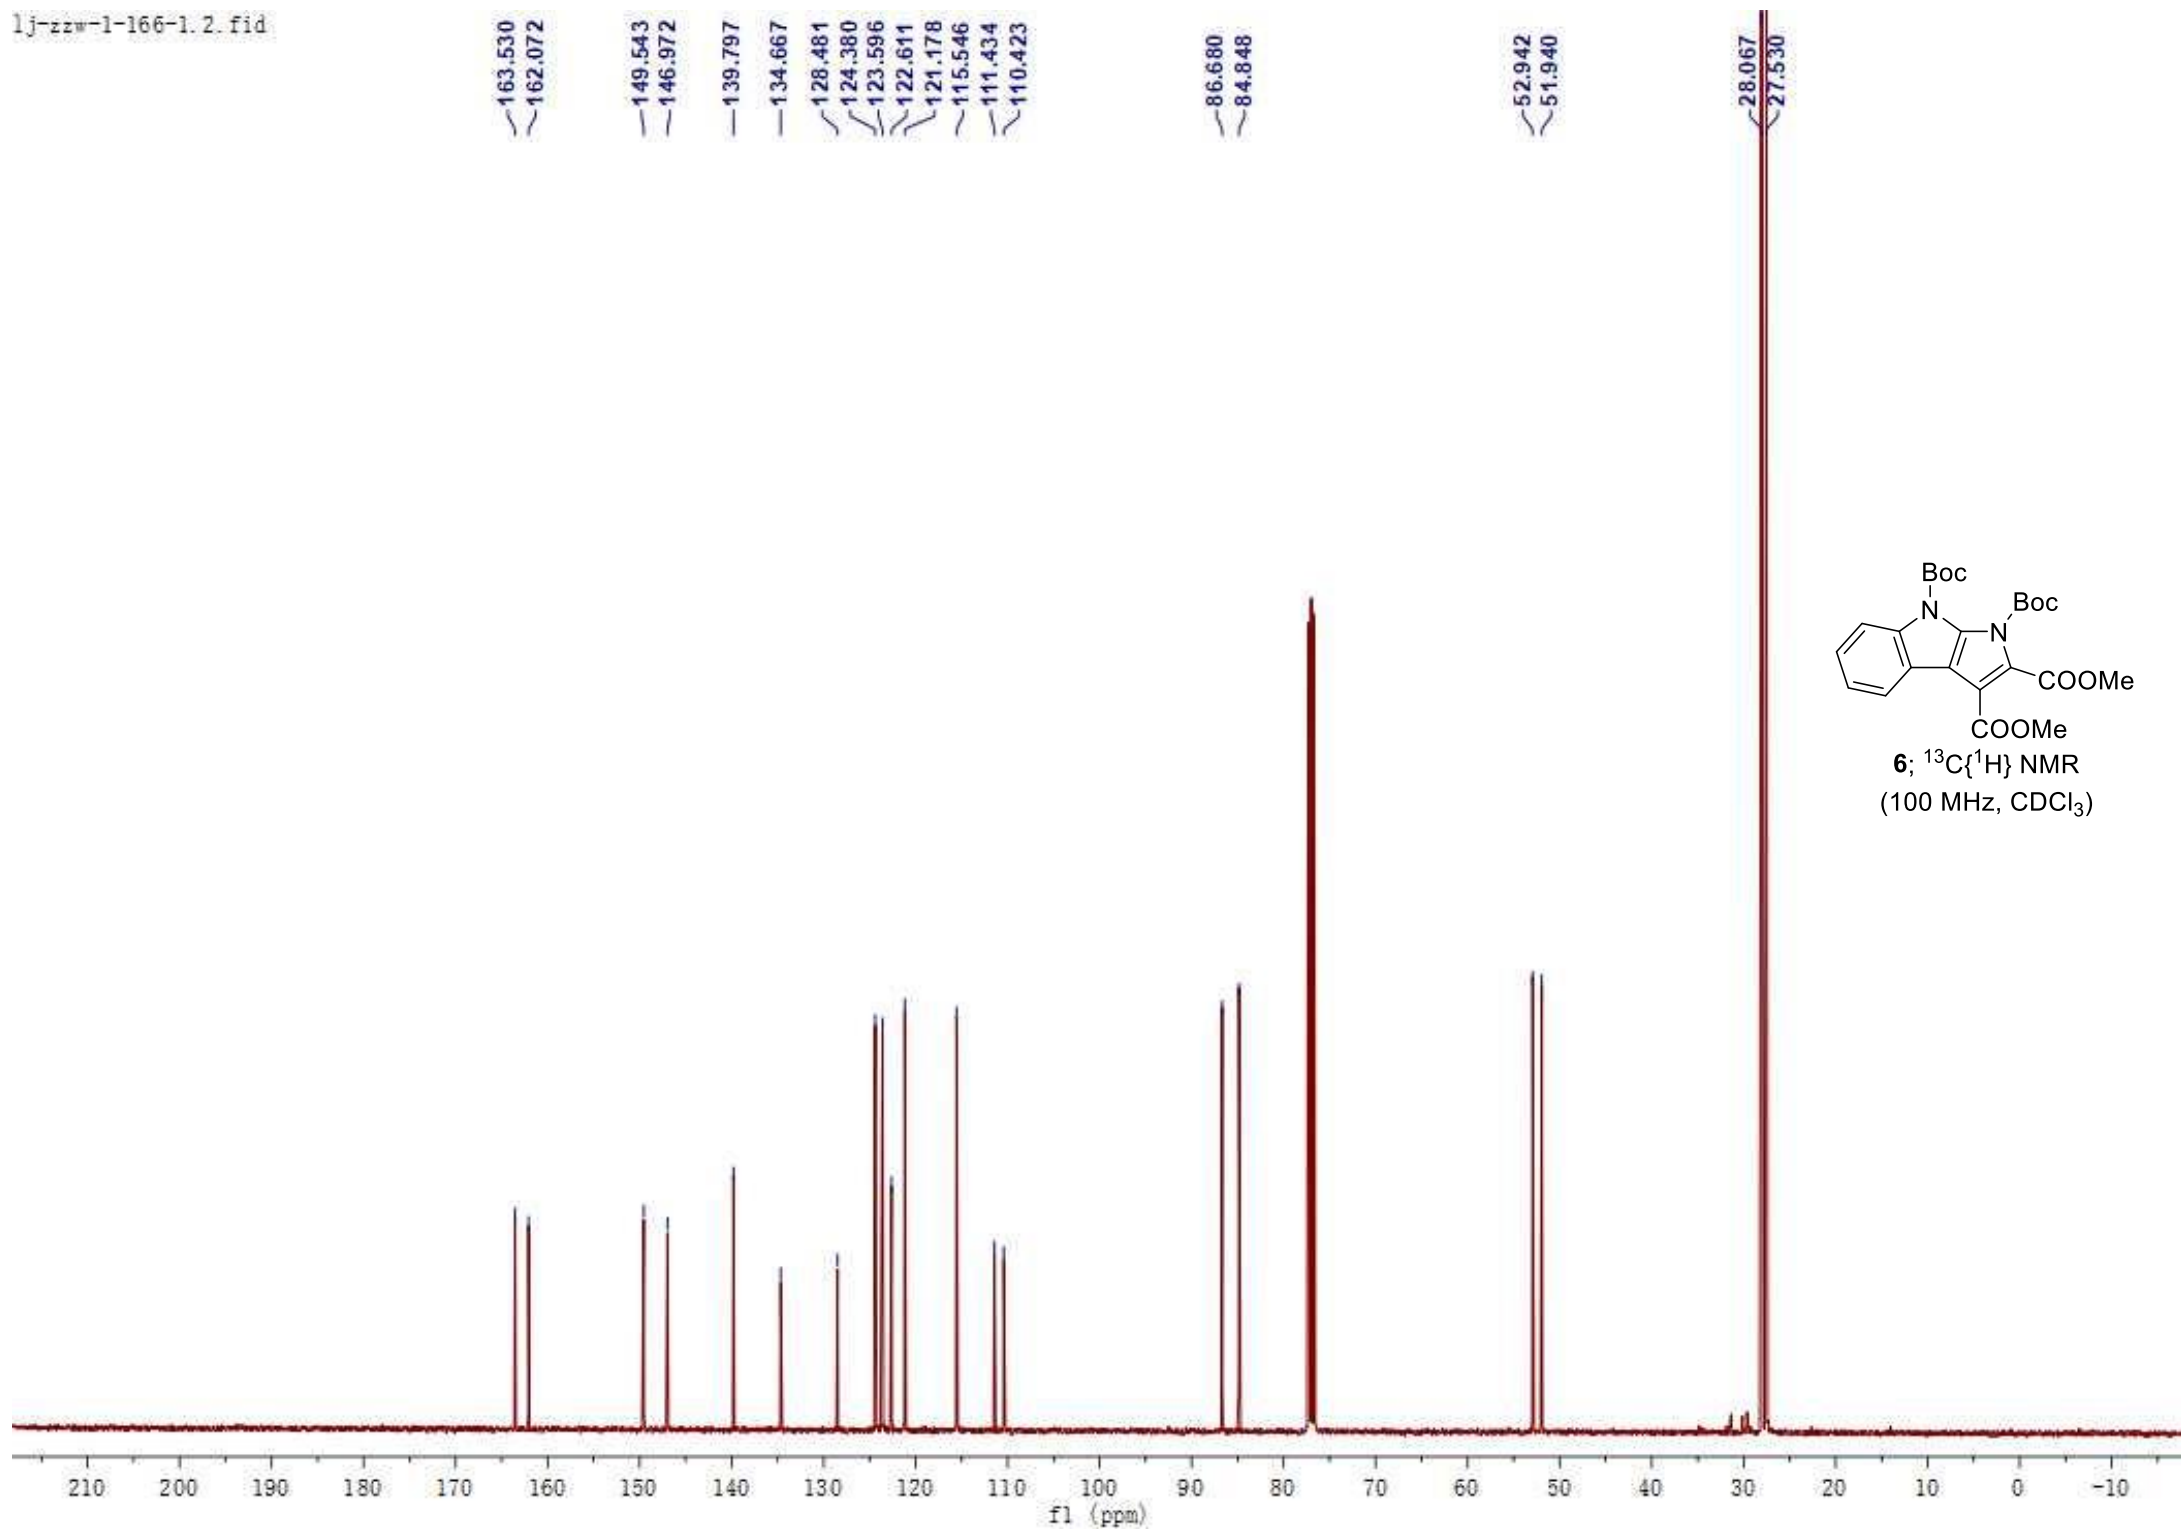

lj-zz-w-1-163-1.1.fid

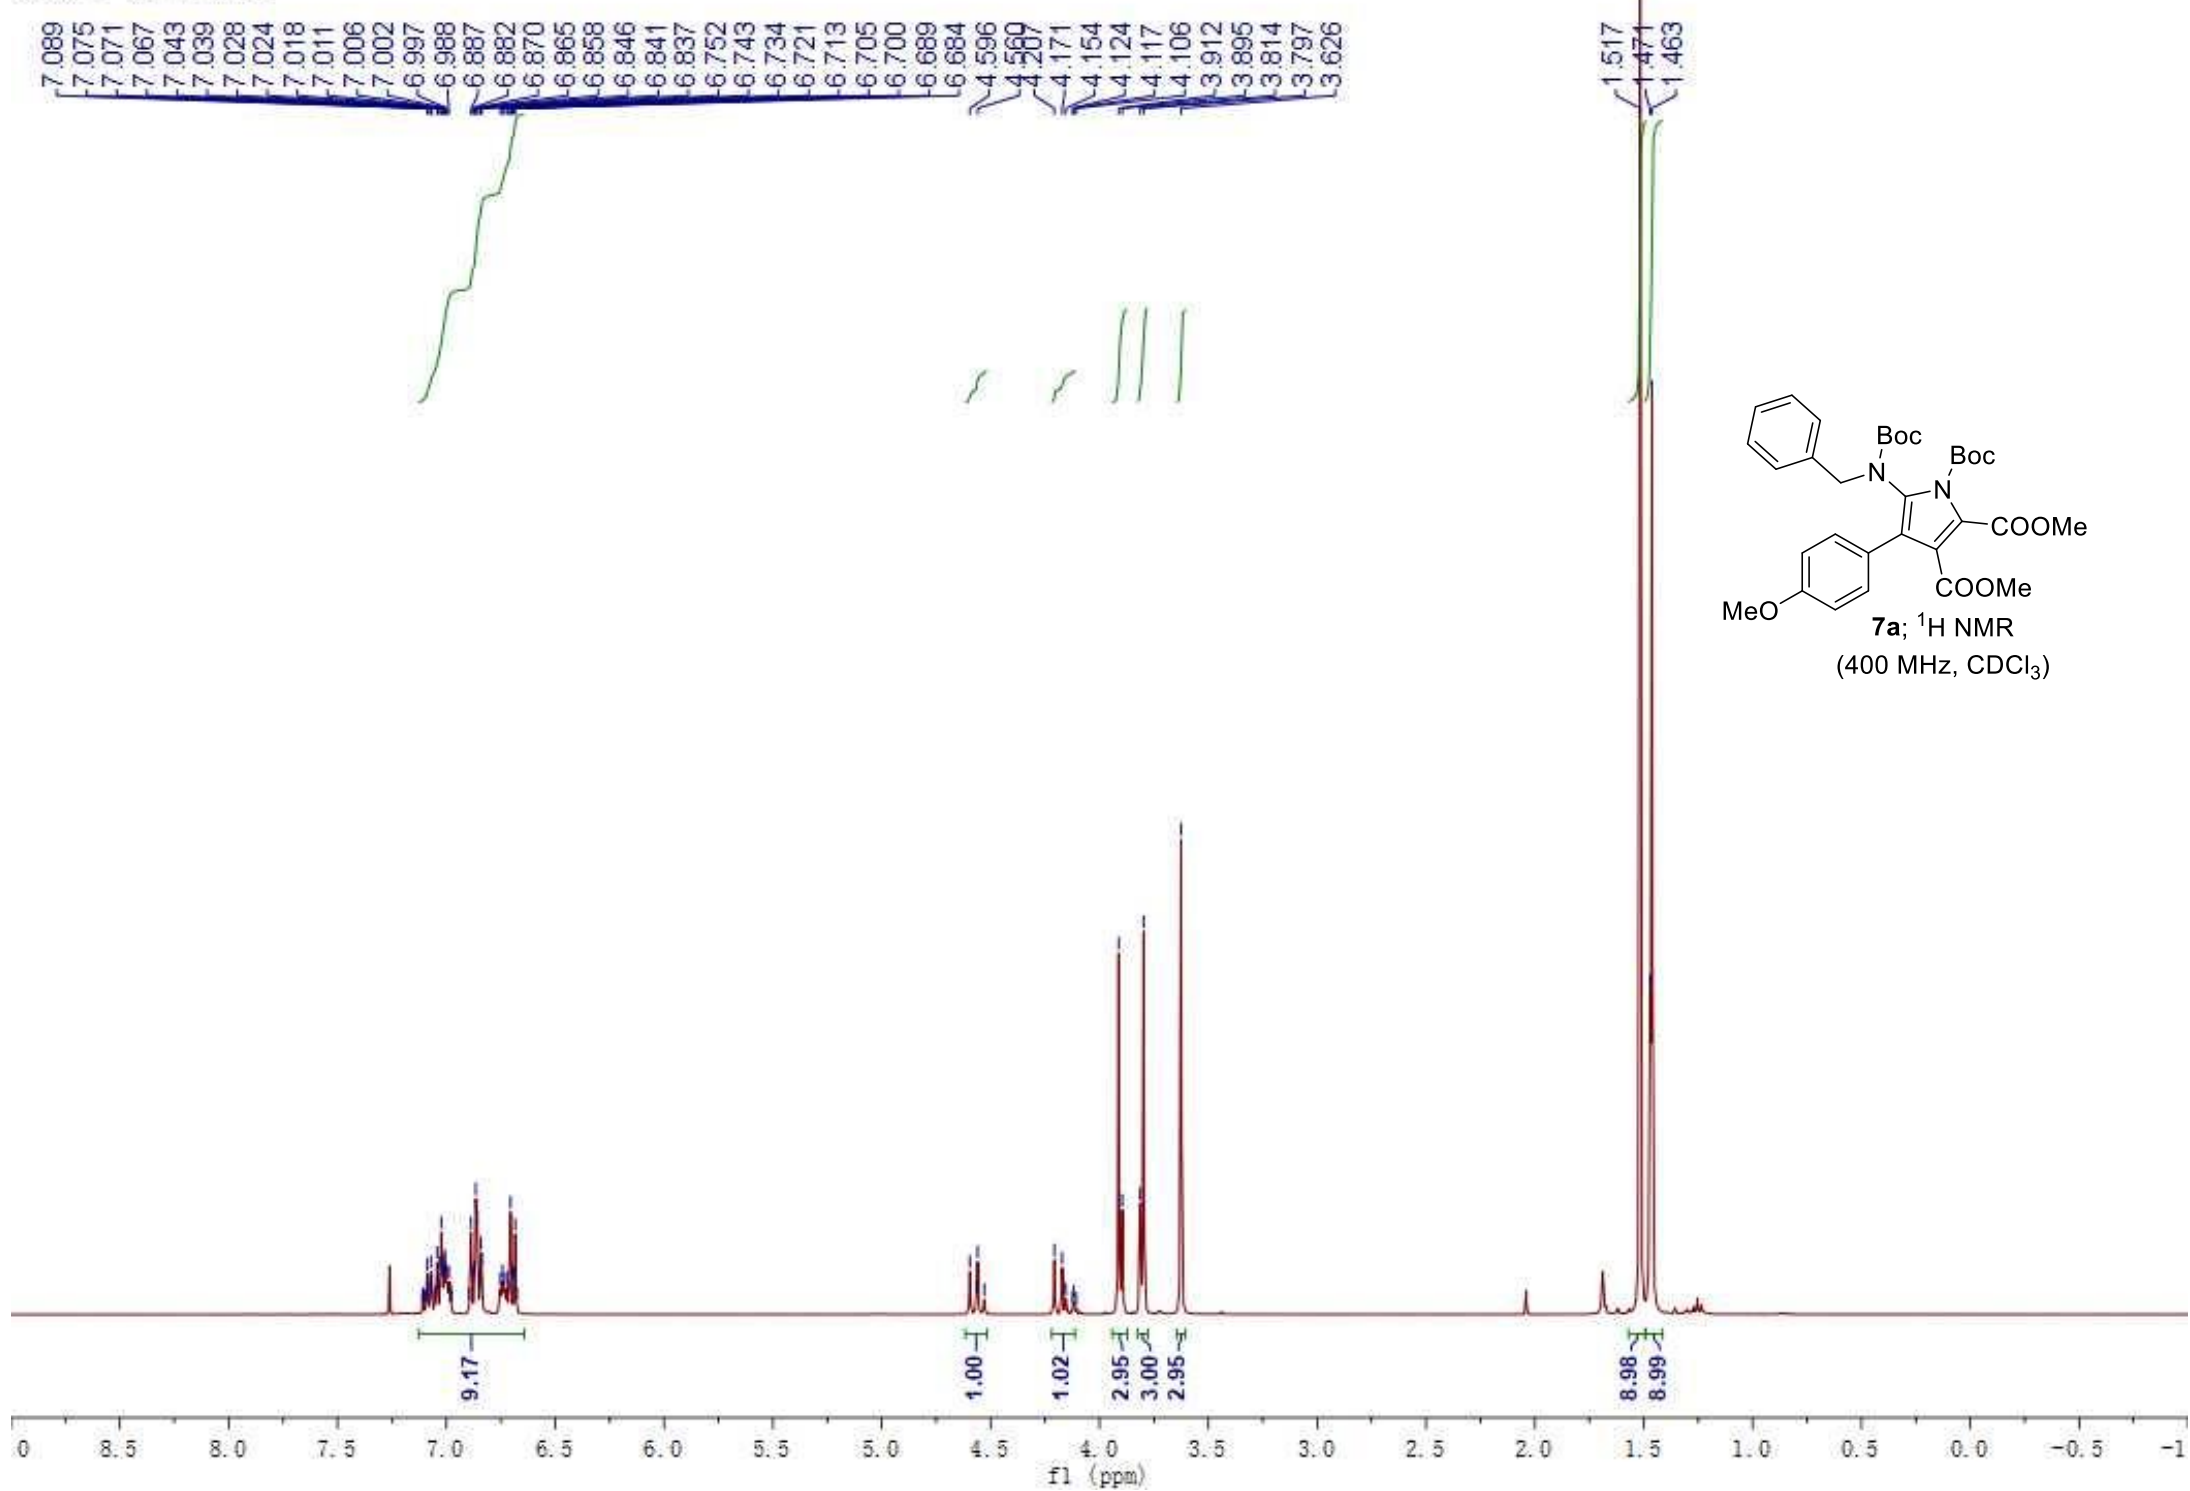

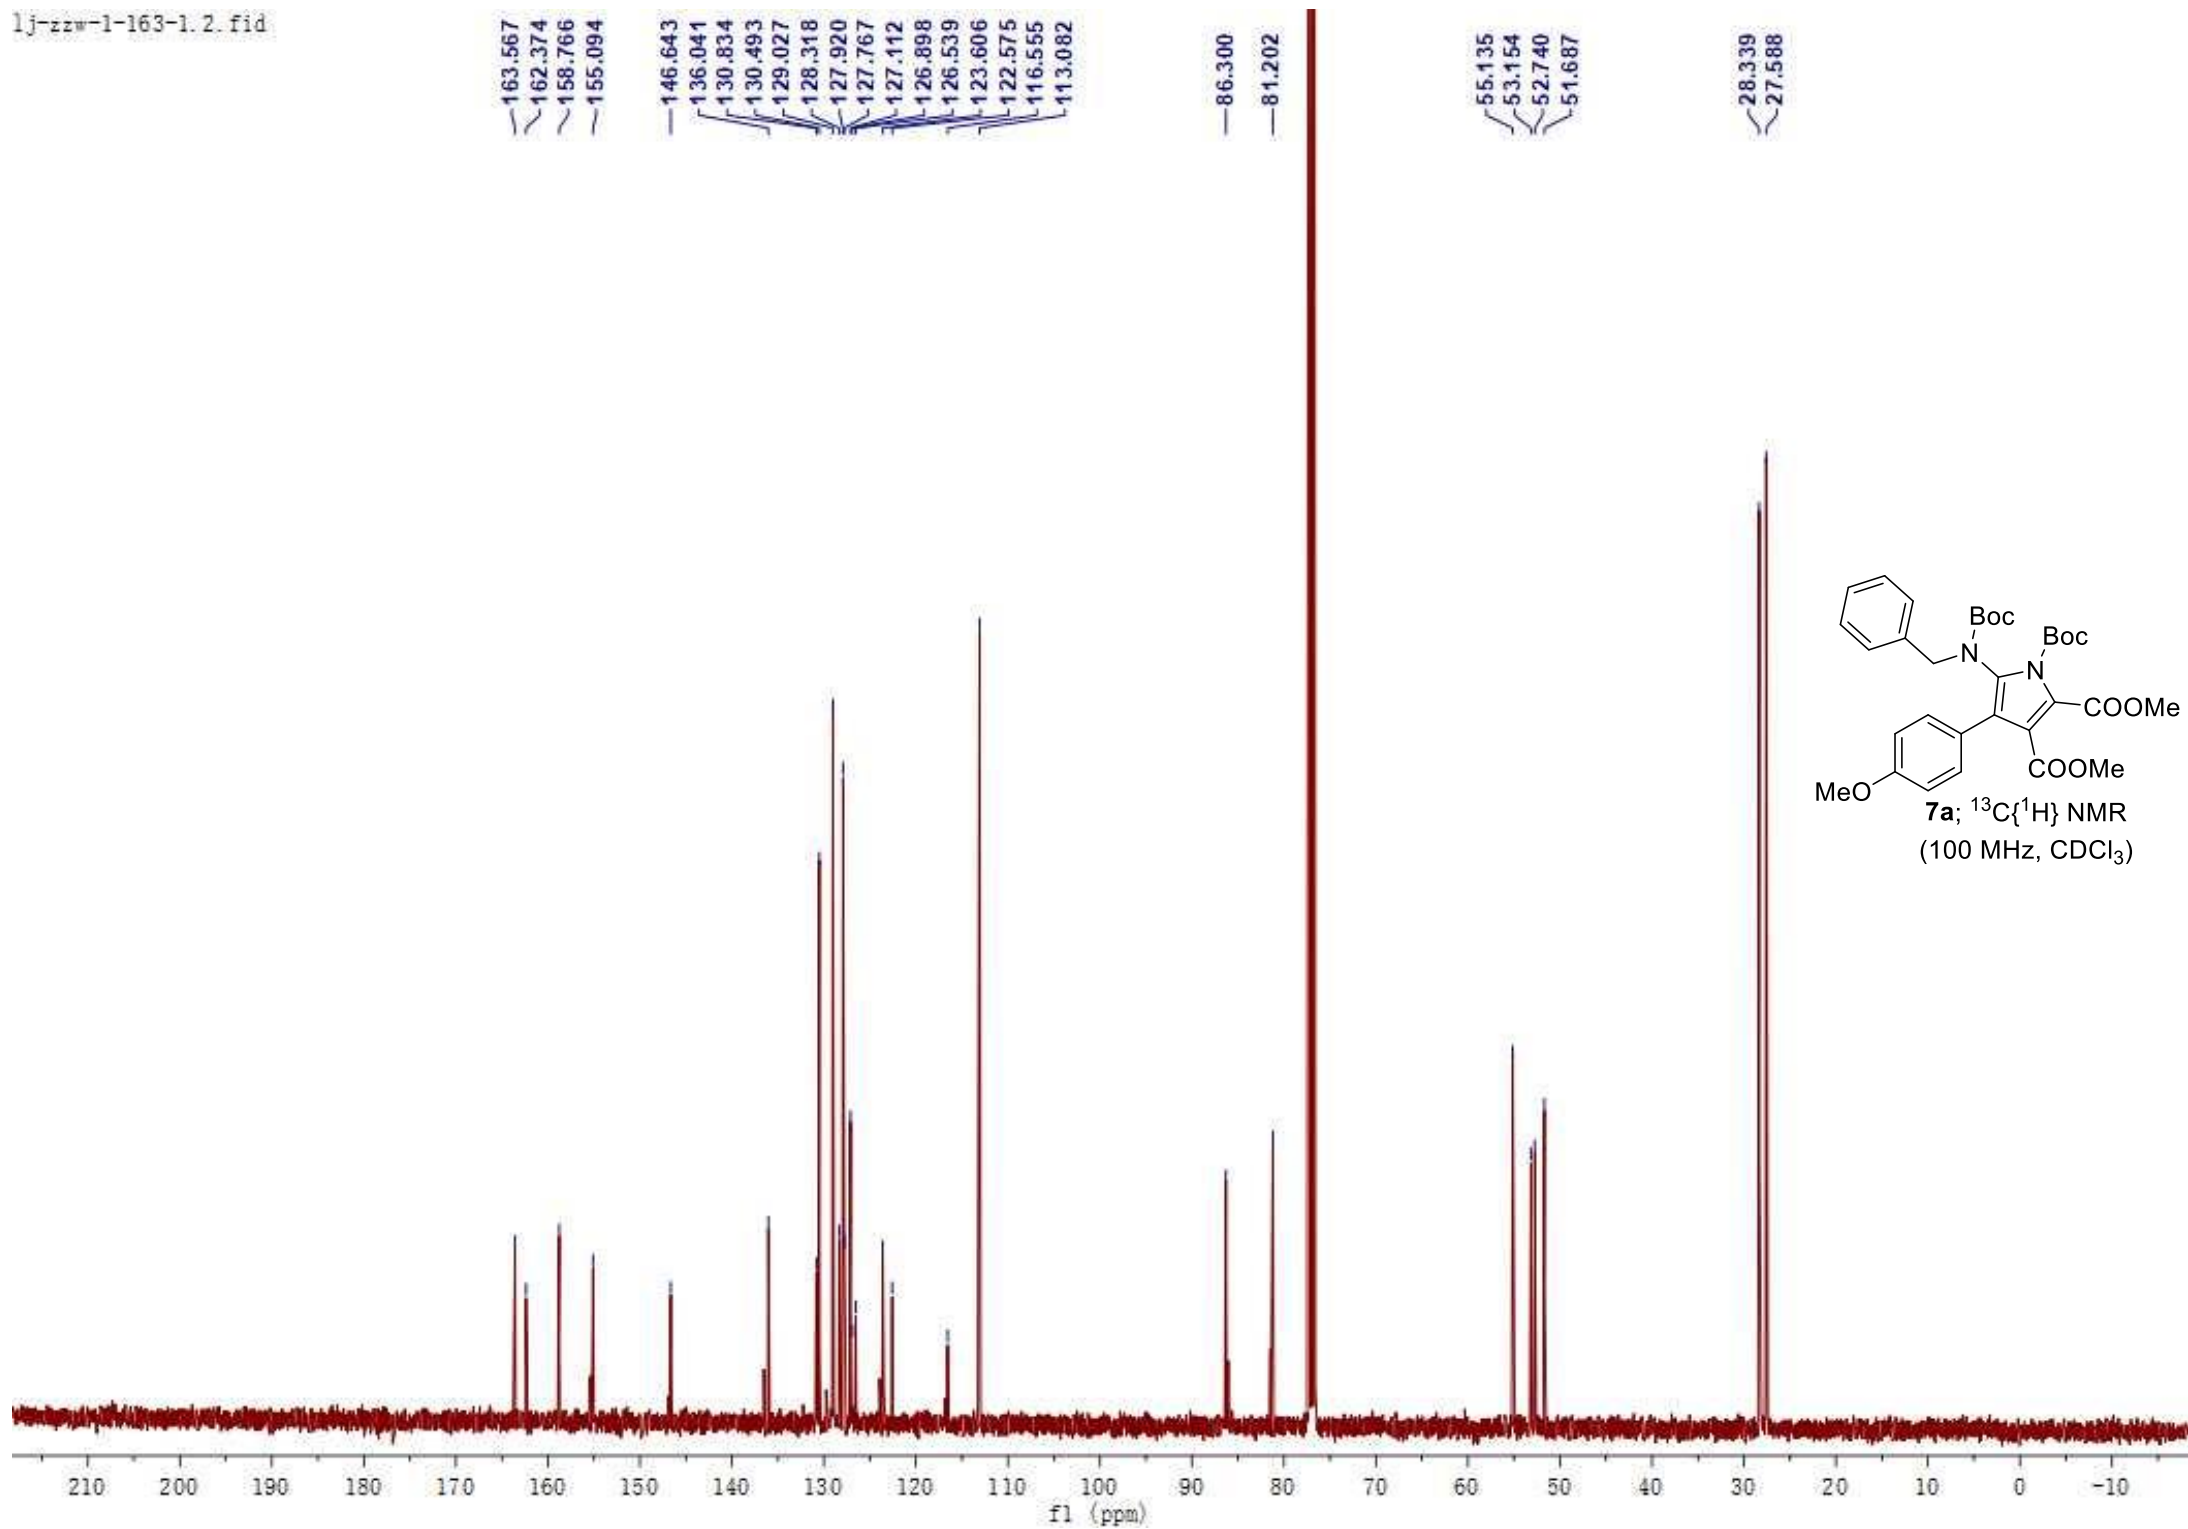



lj-zzw-2-177-1.1.1.1r

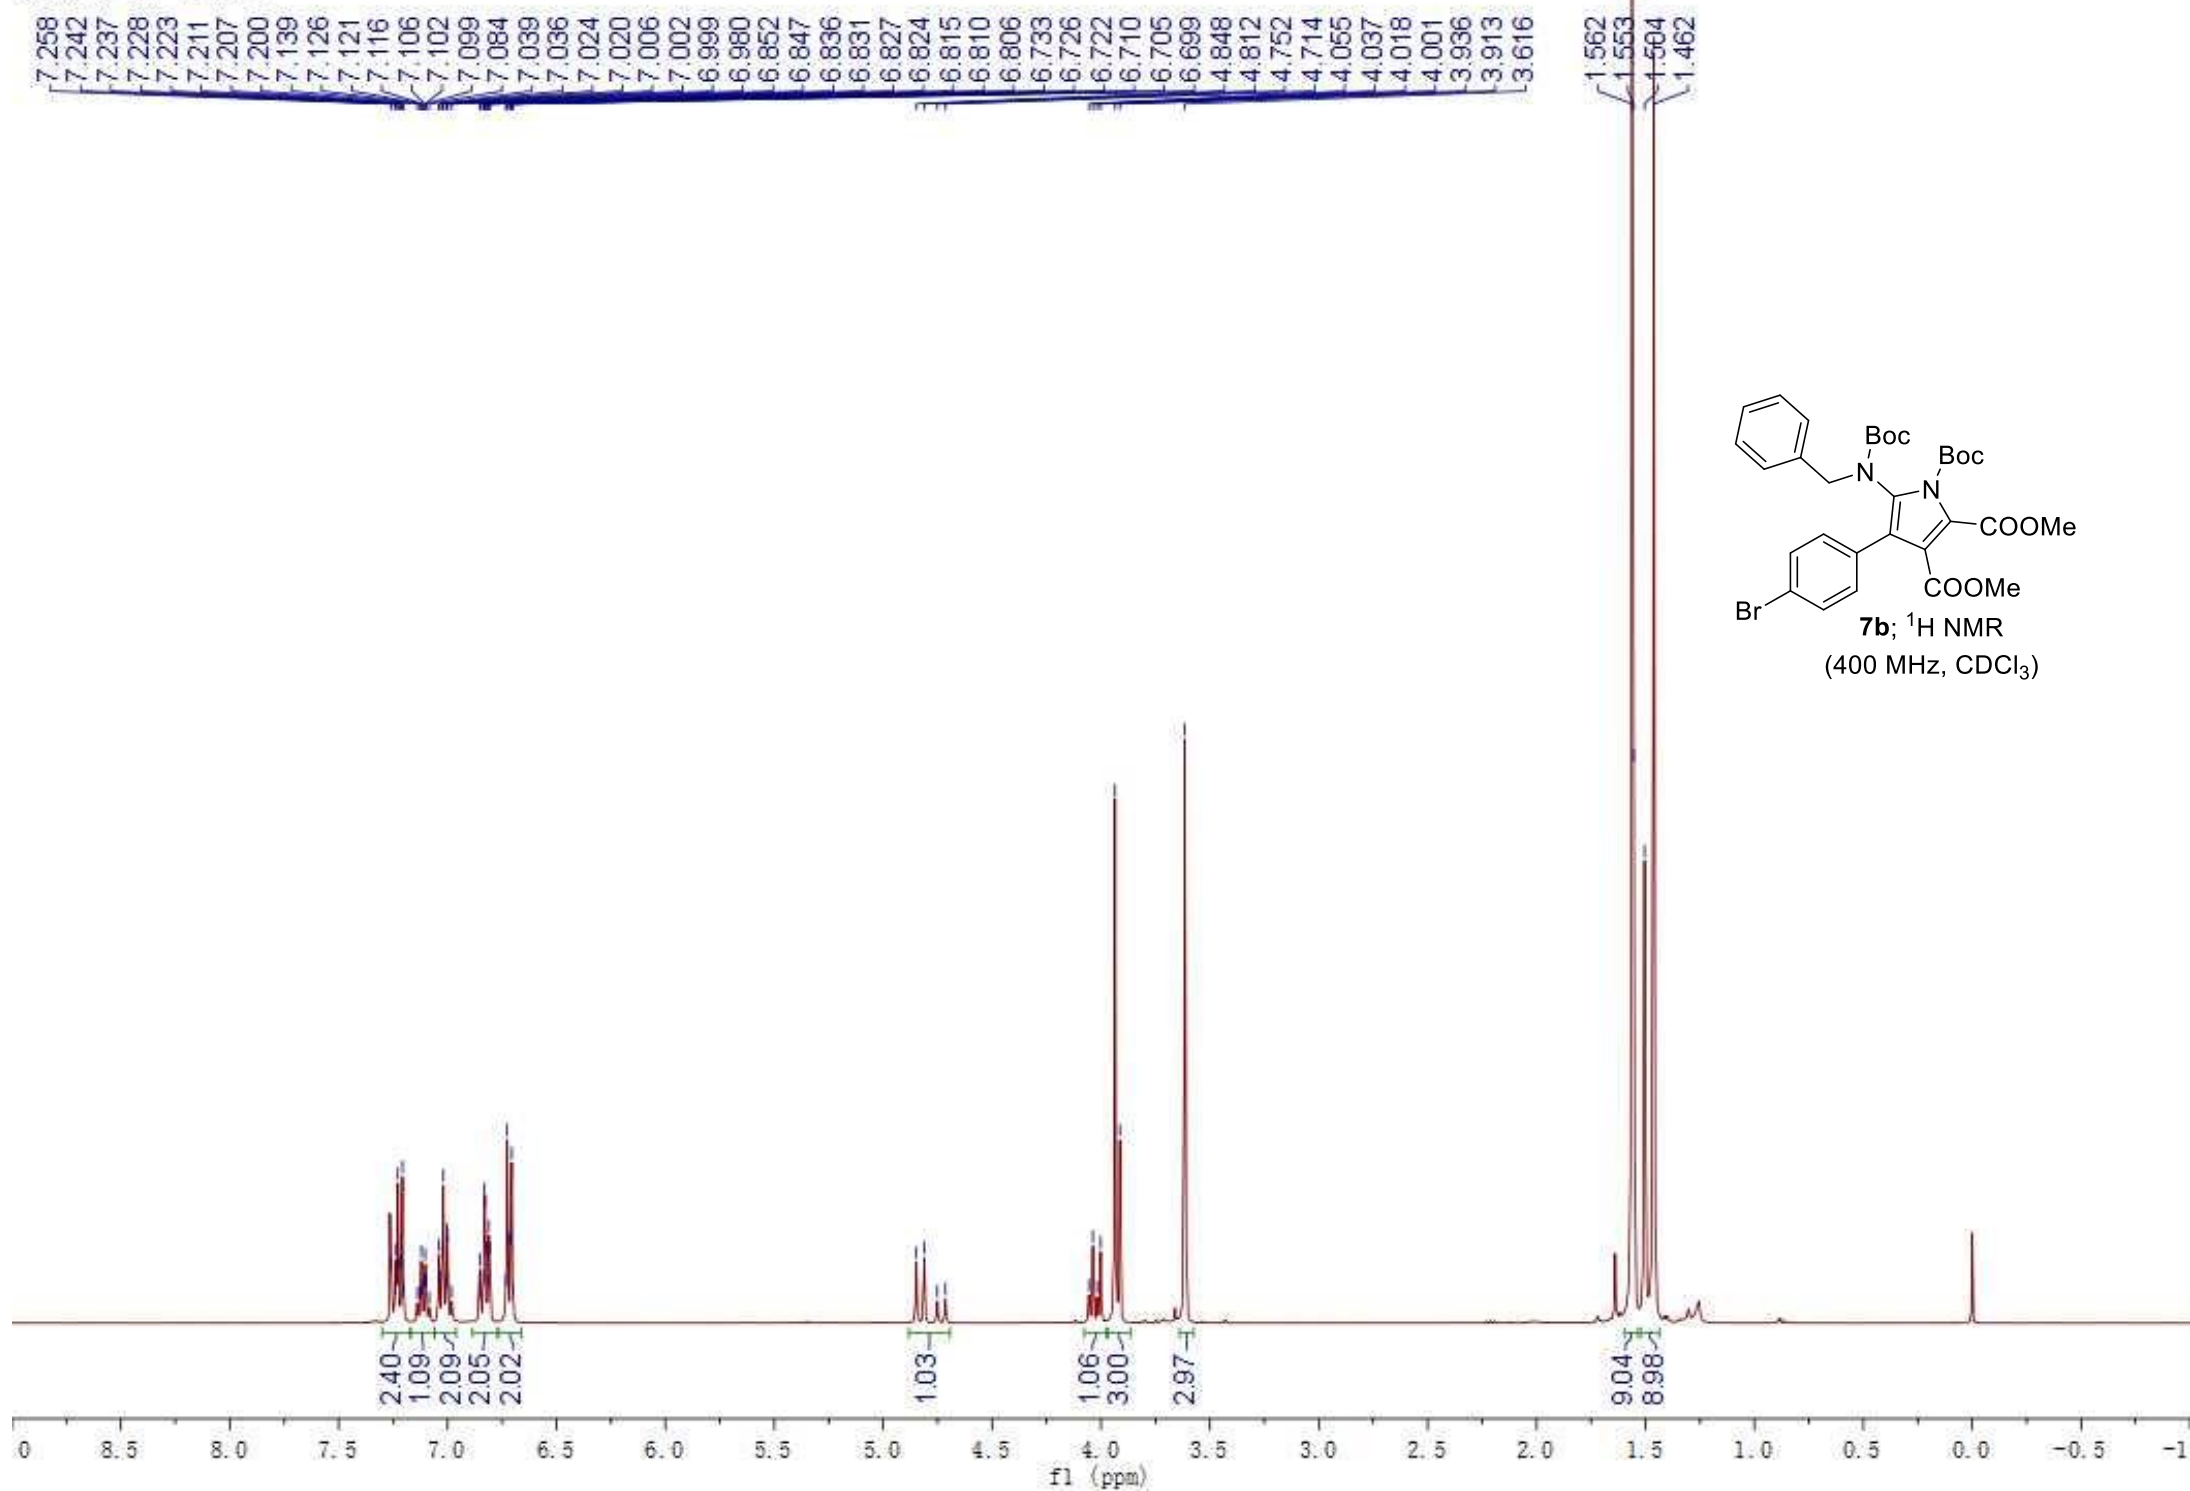

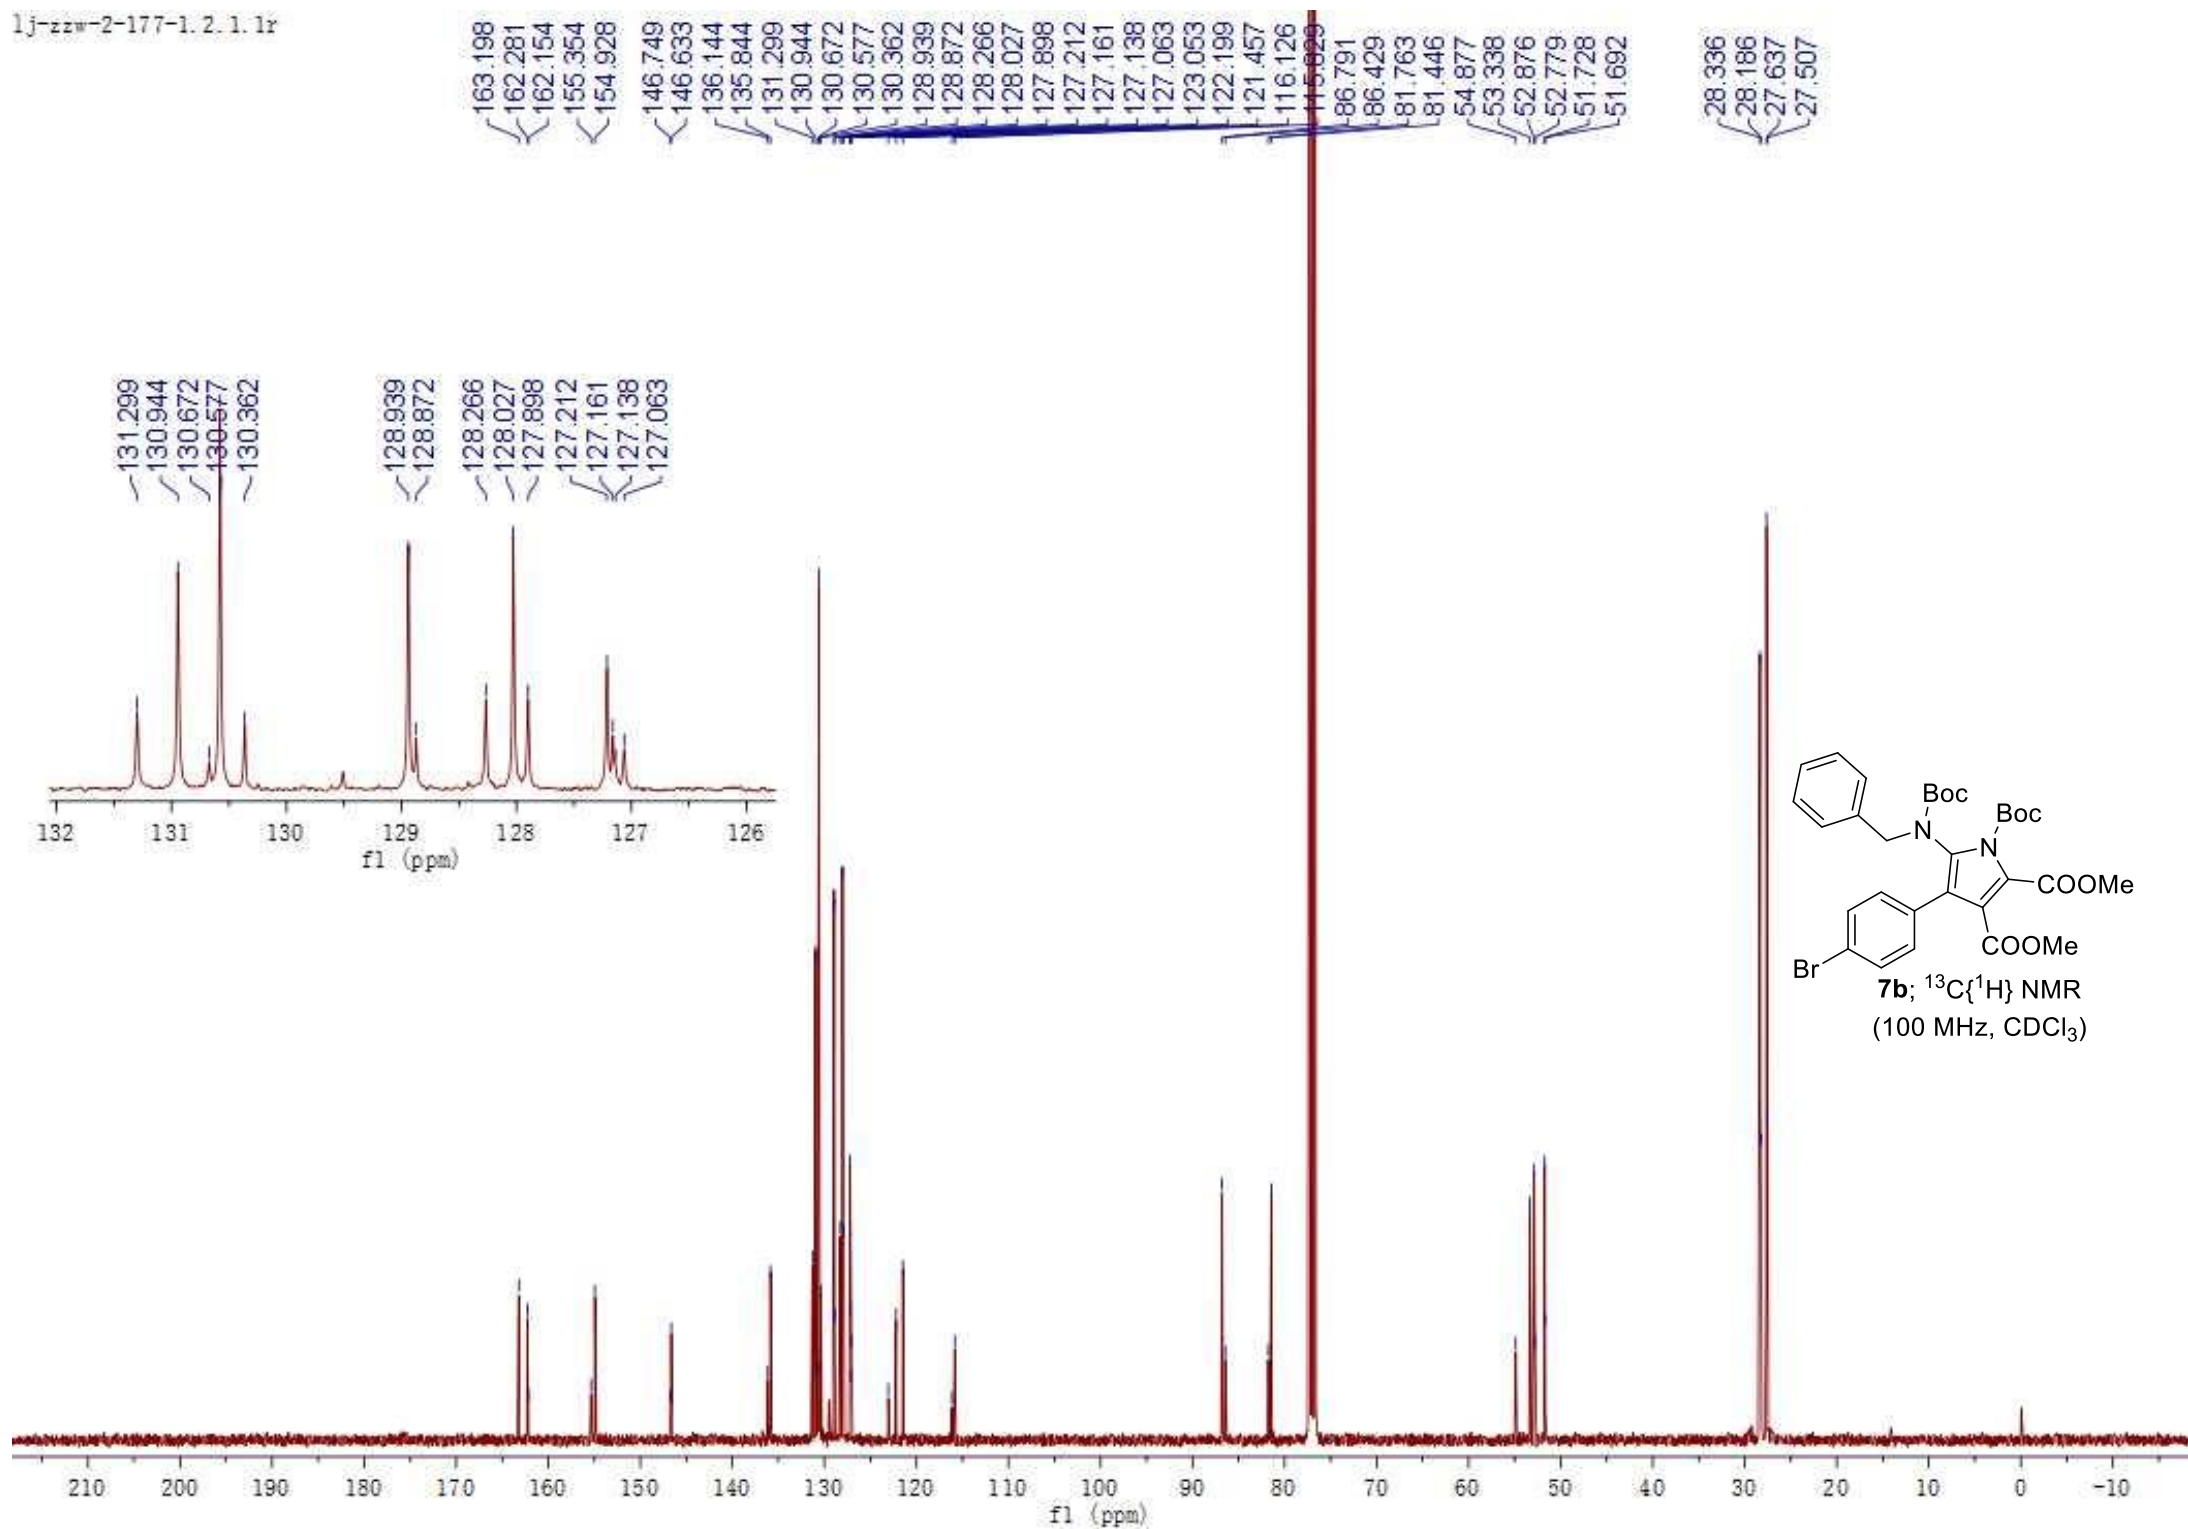

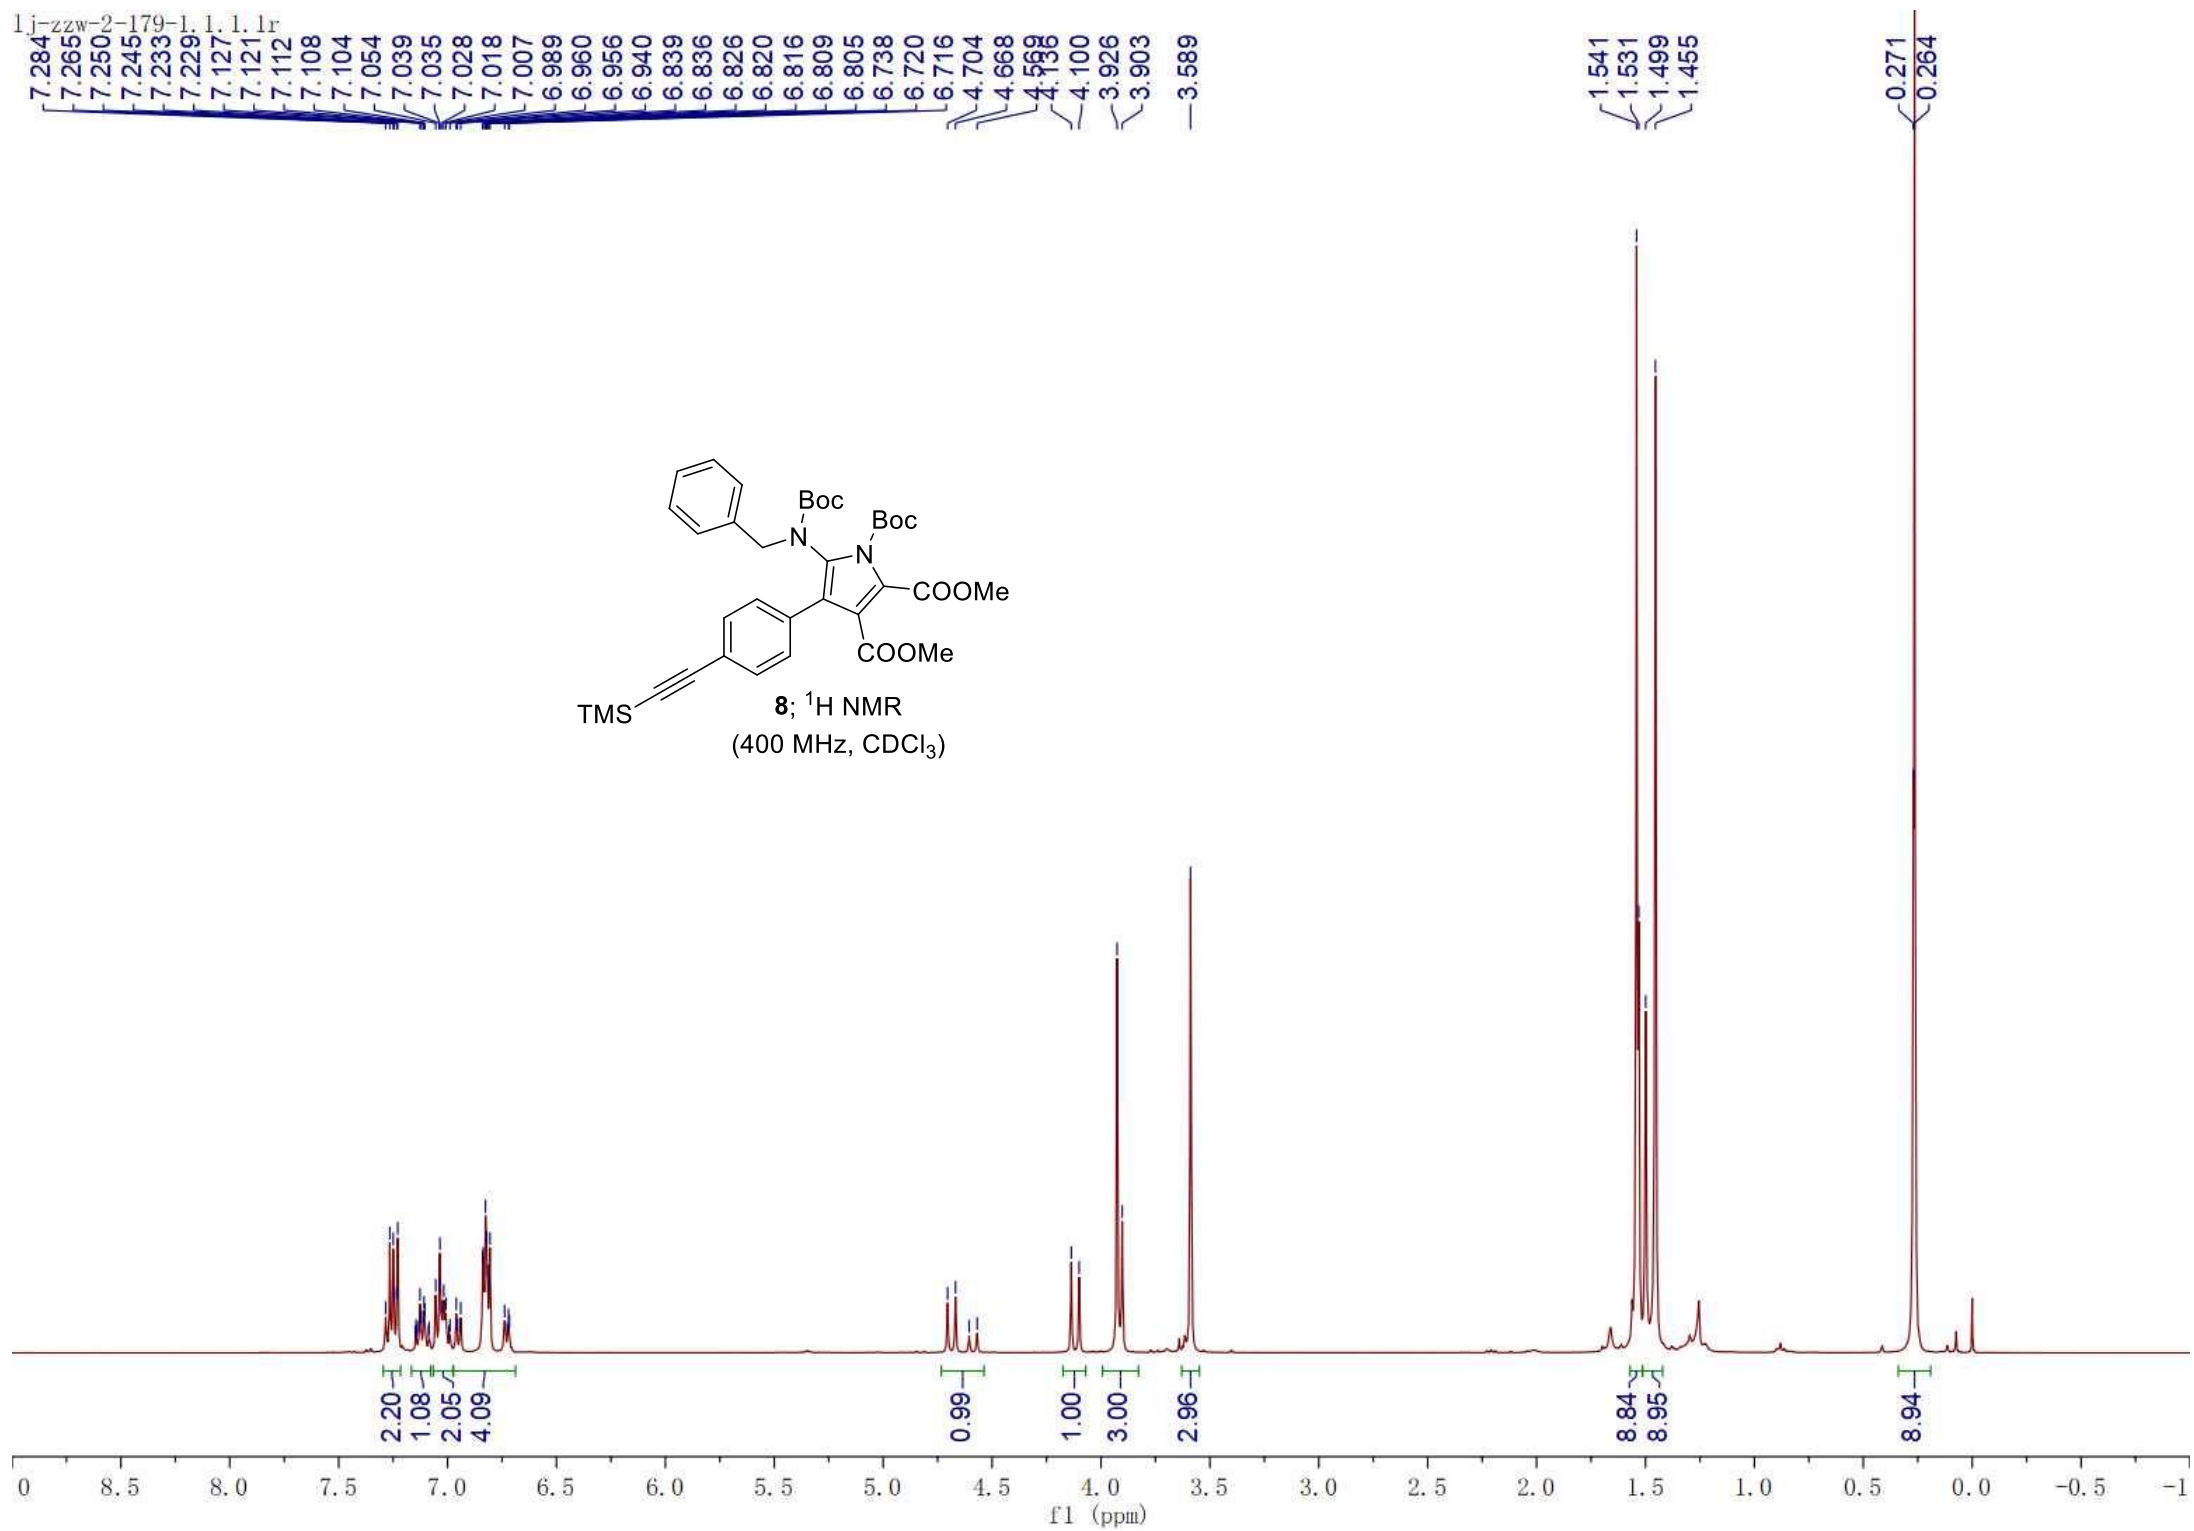

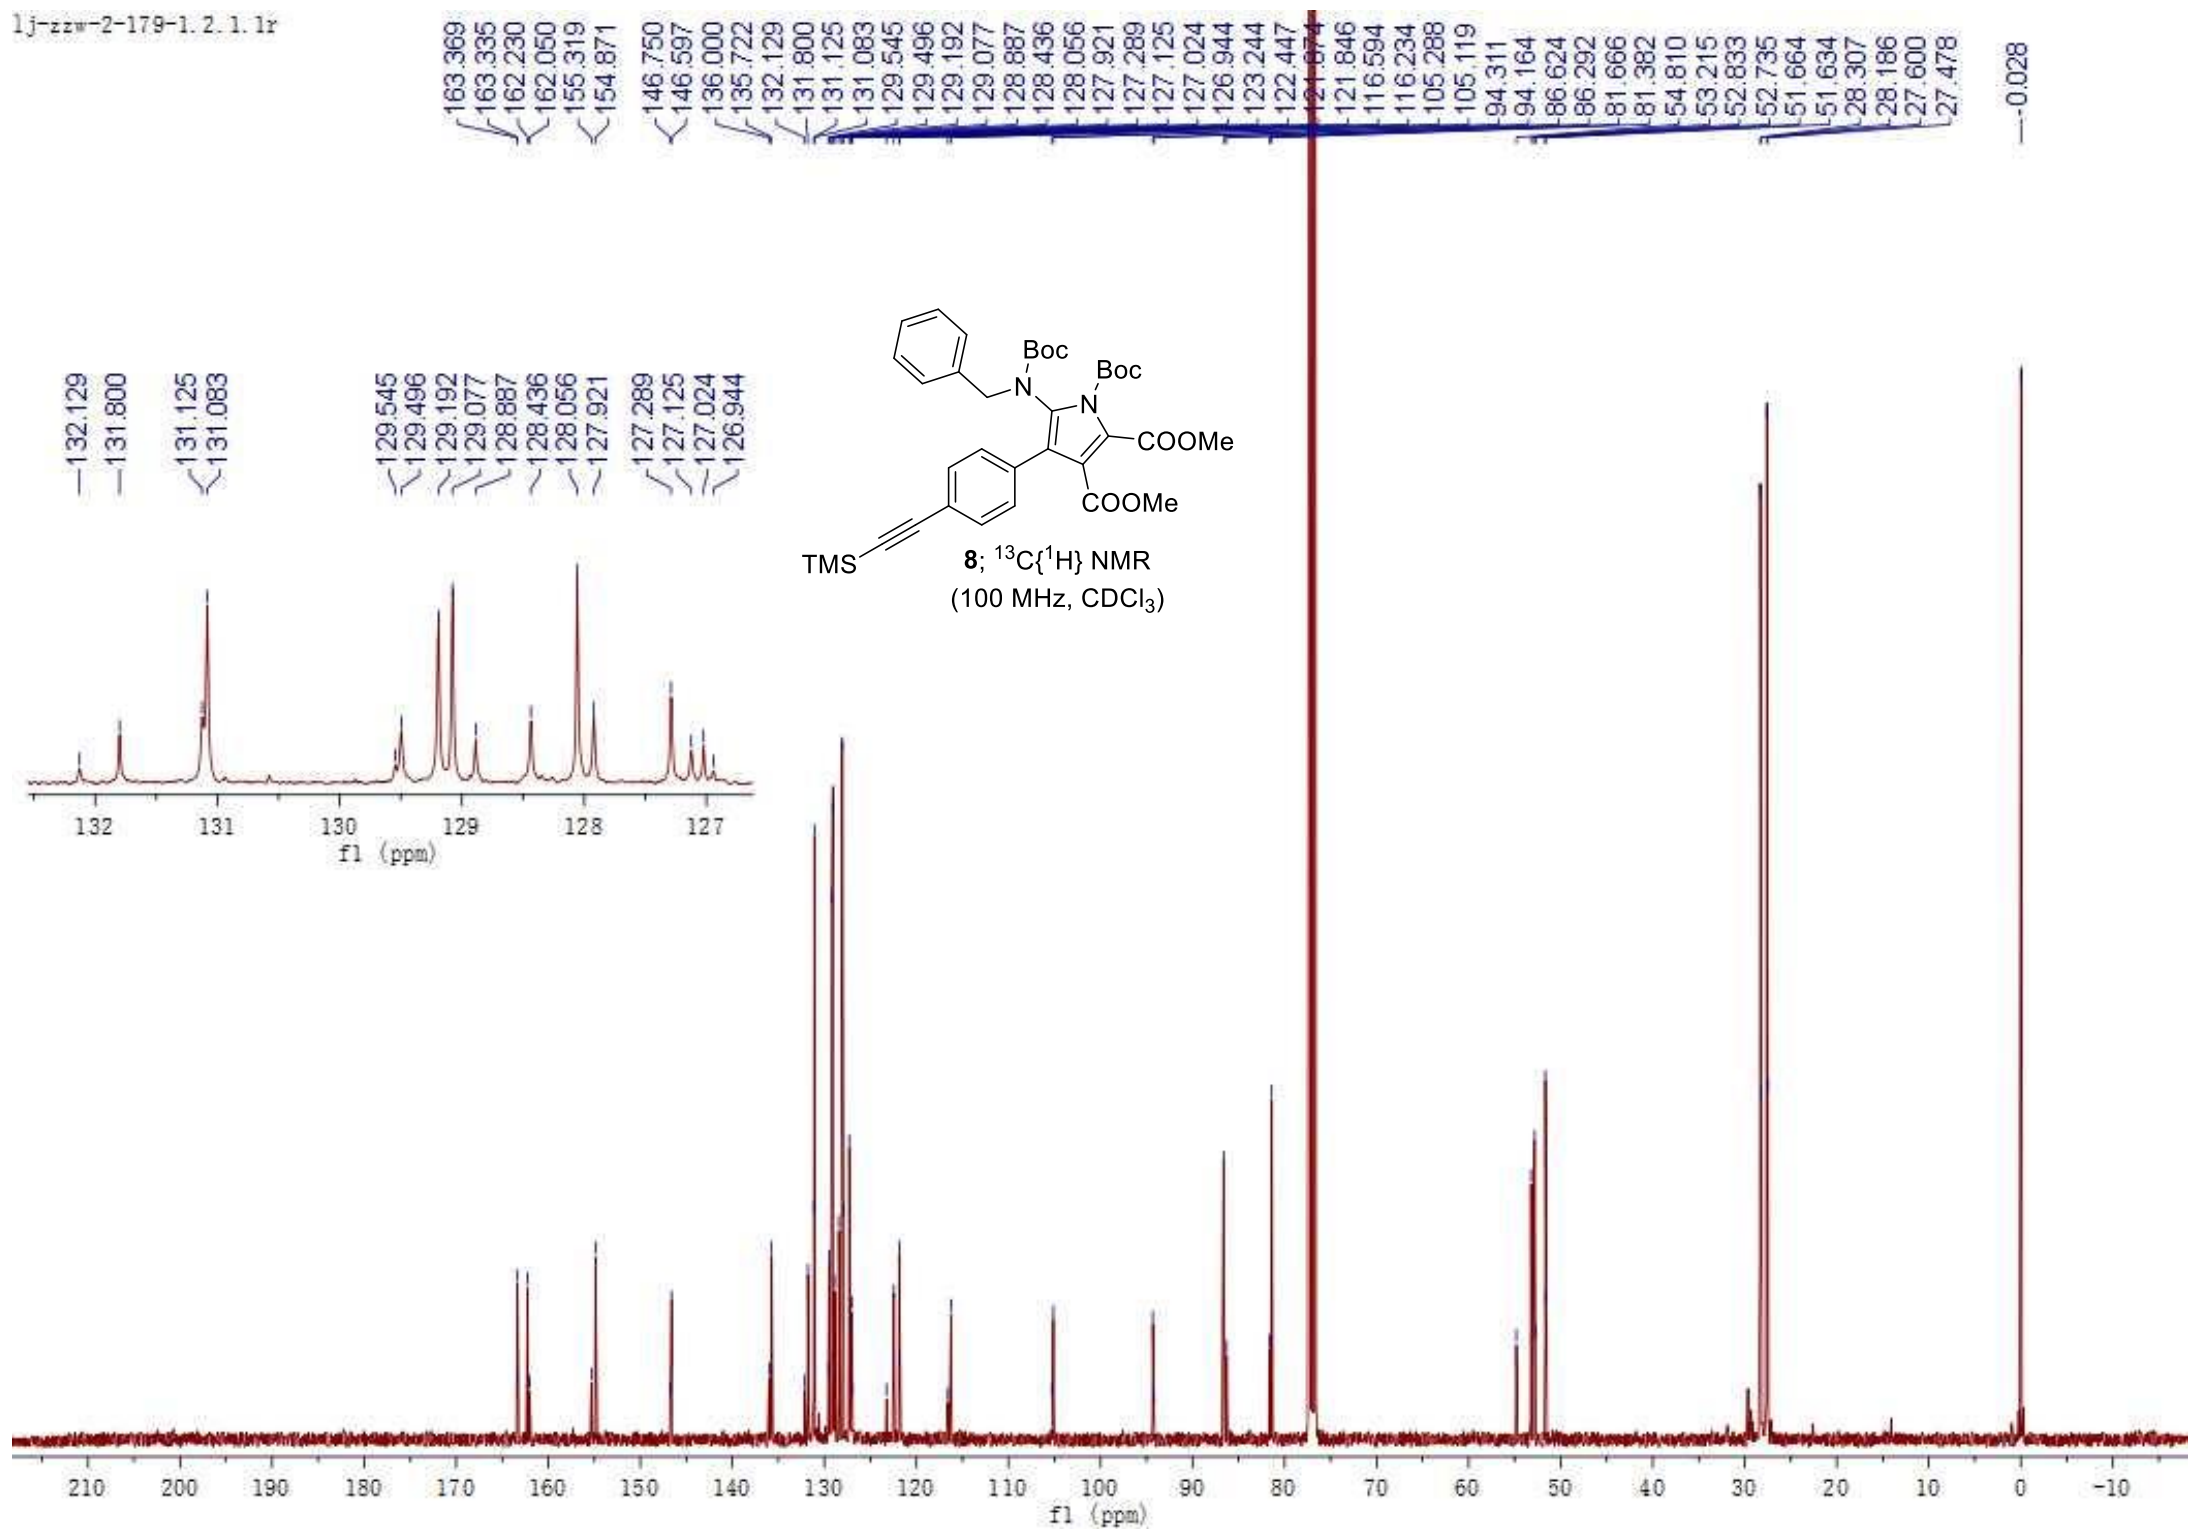

1j-zzw-2-172-1.1.1.1r

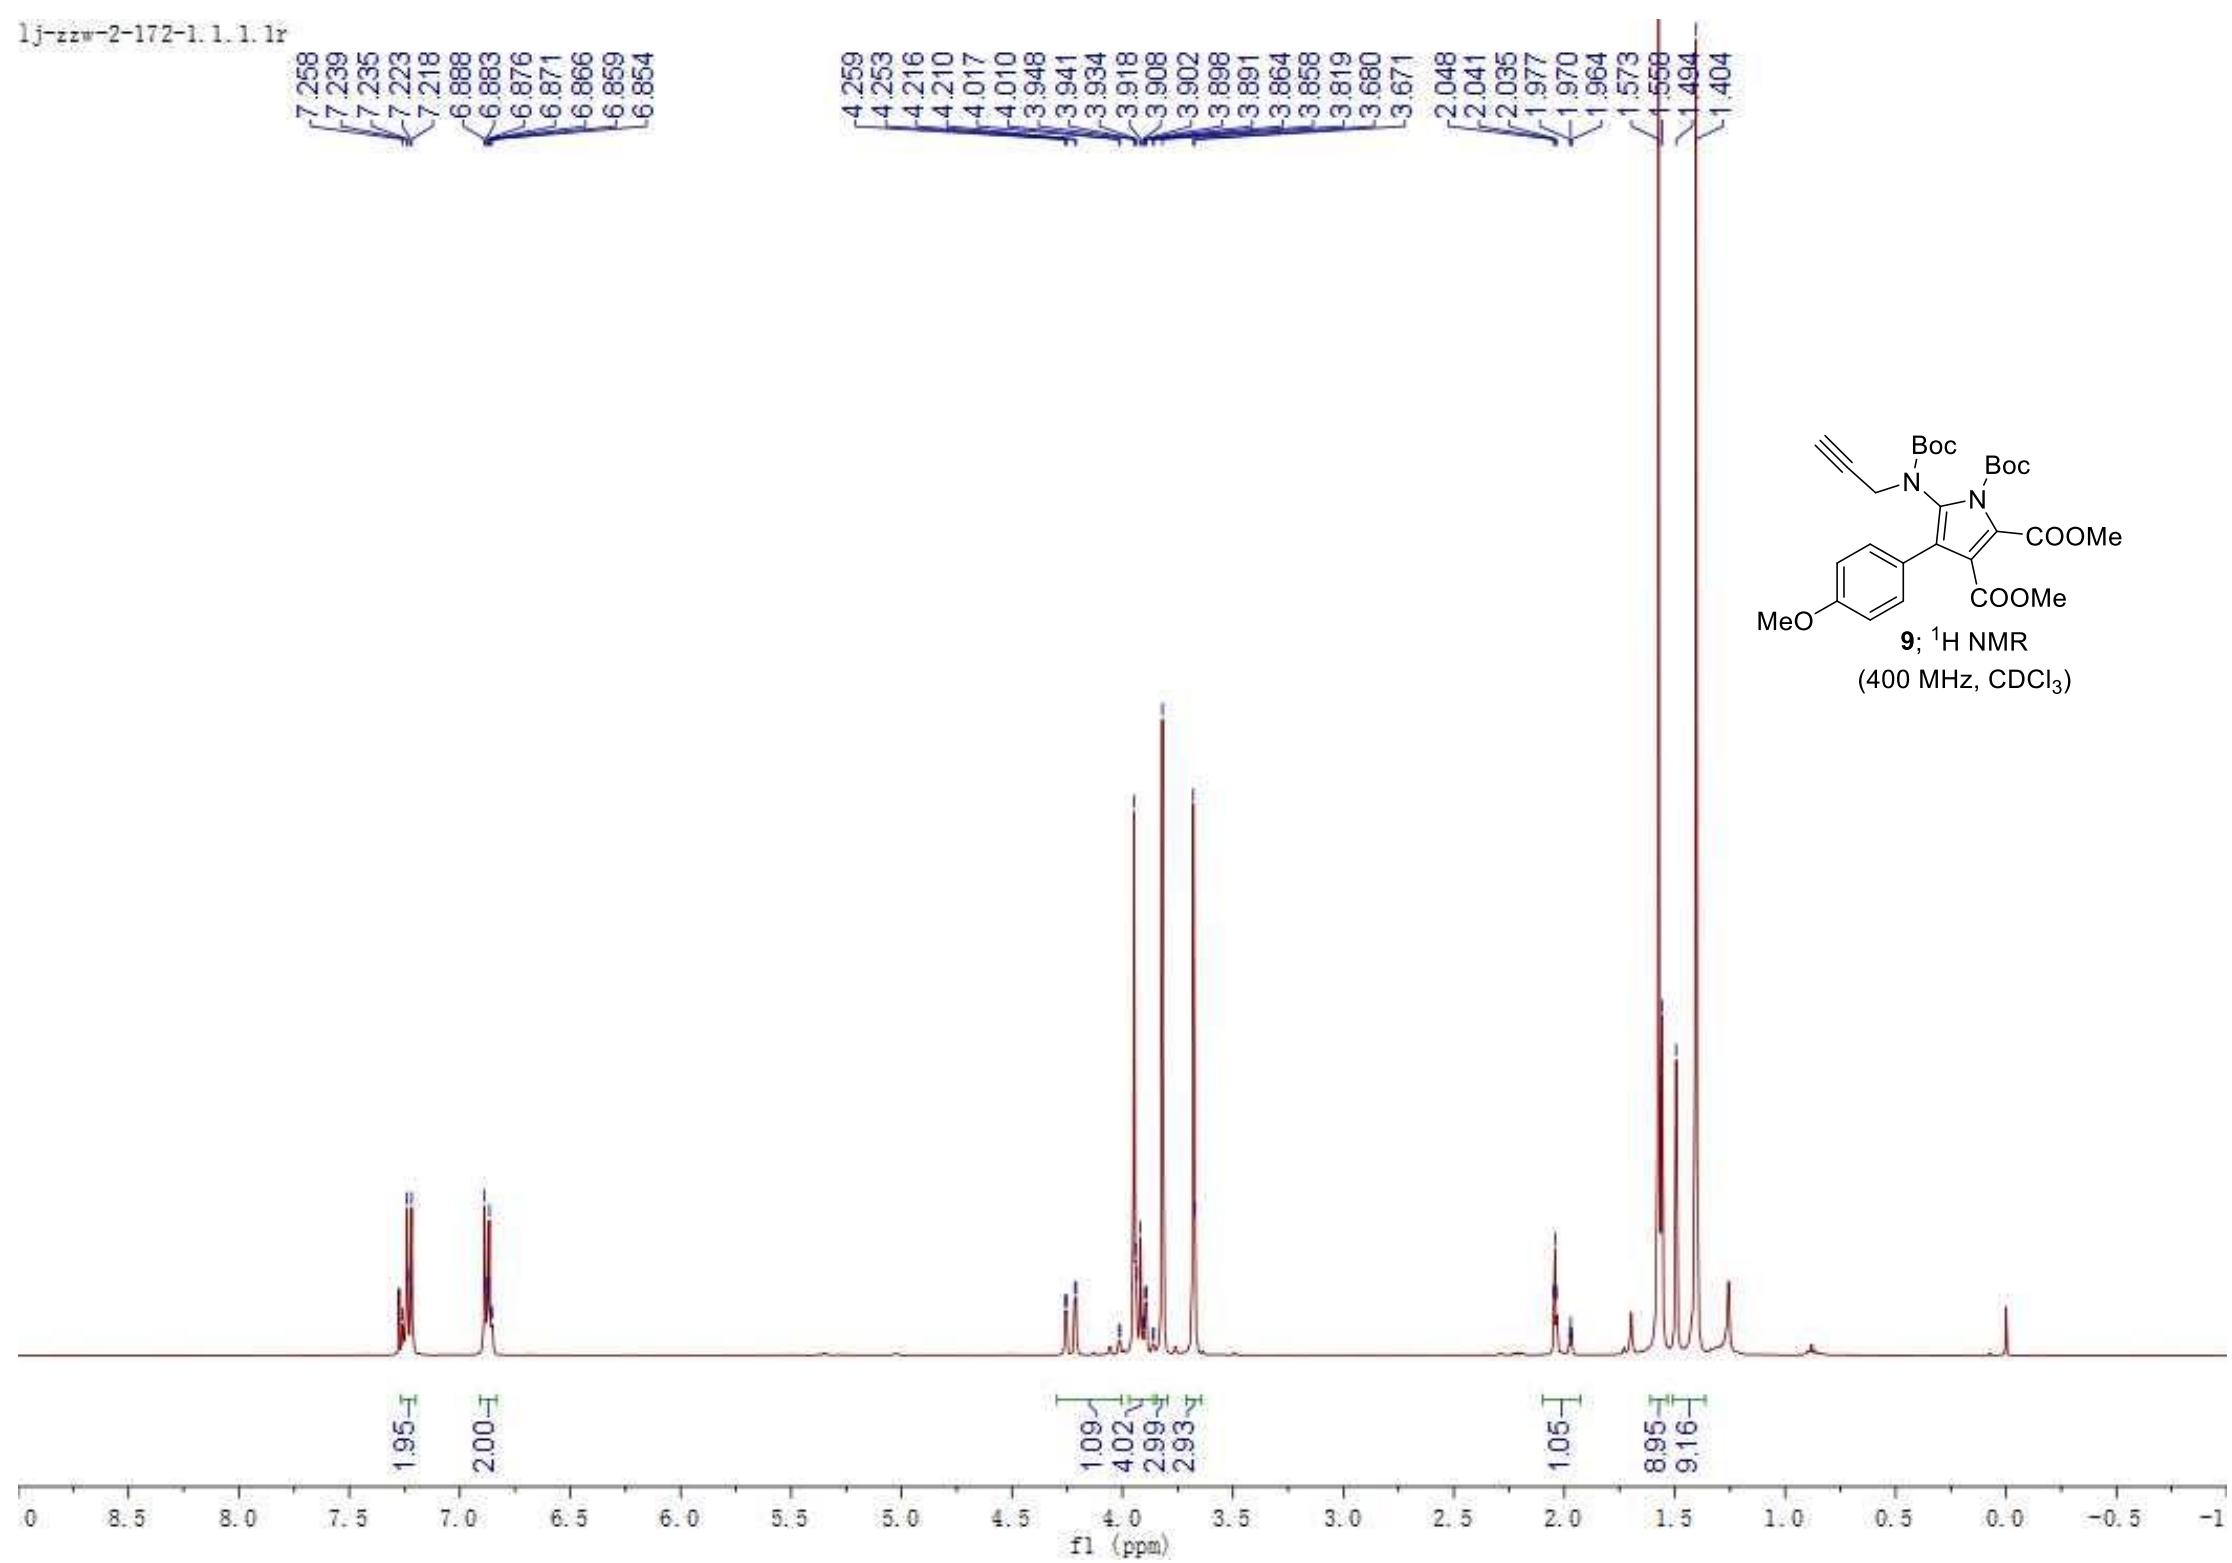



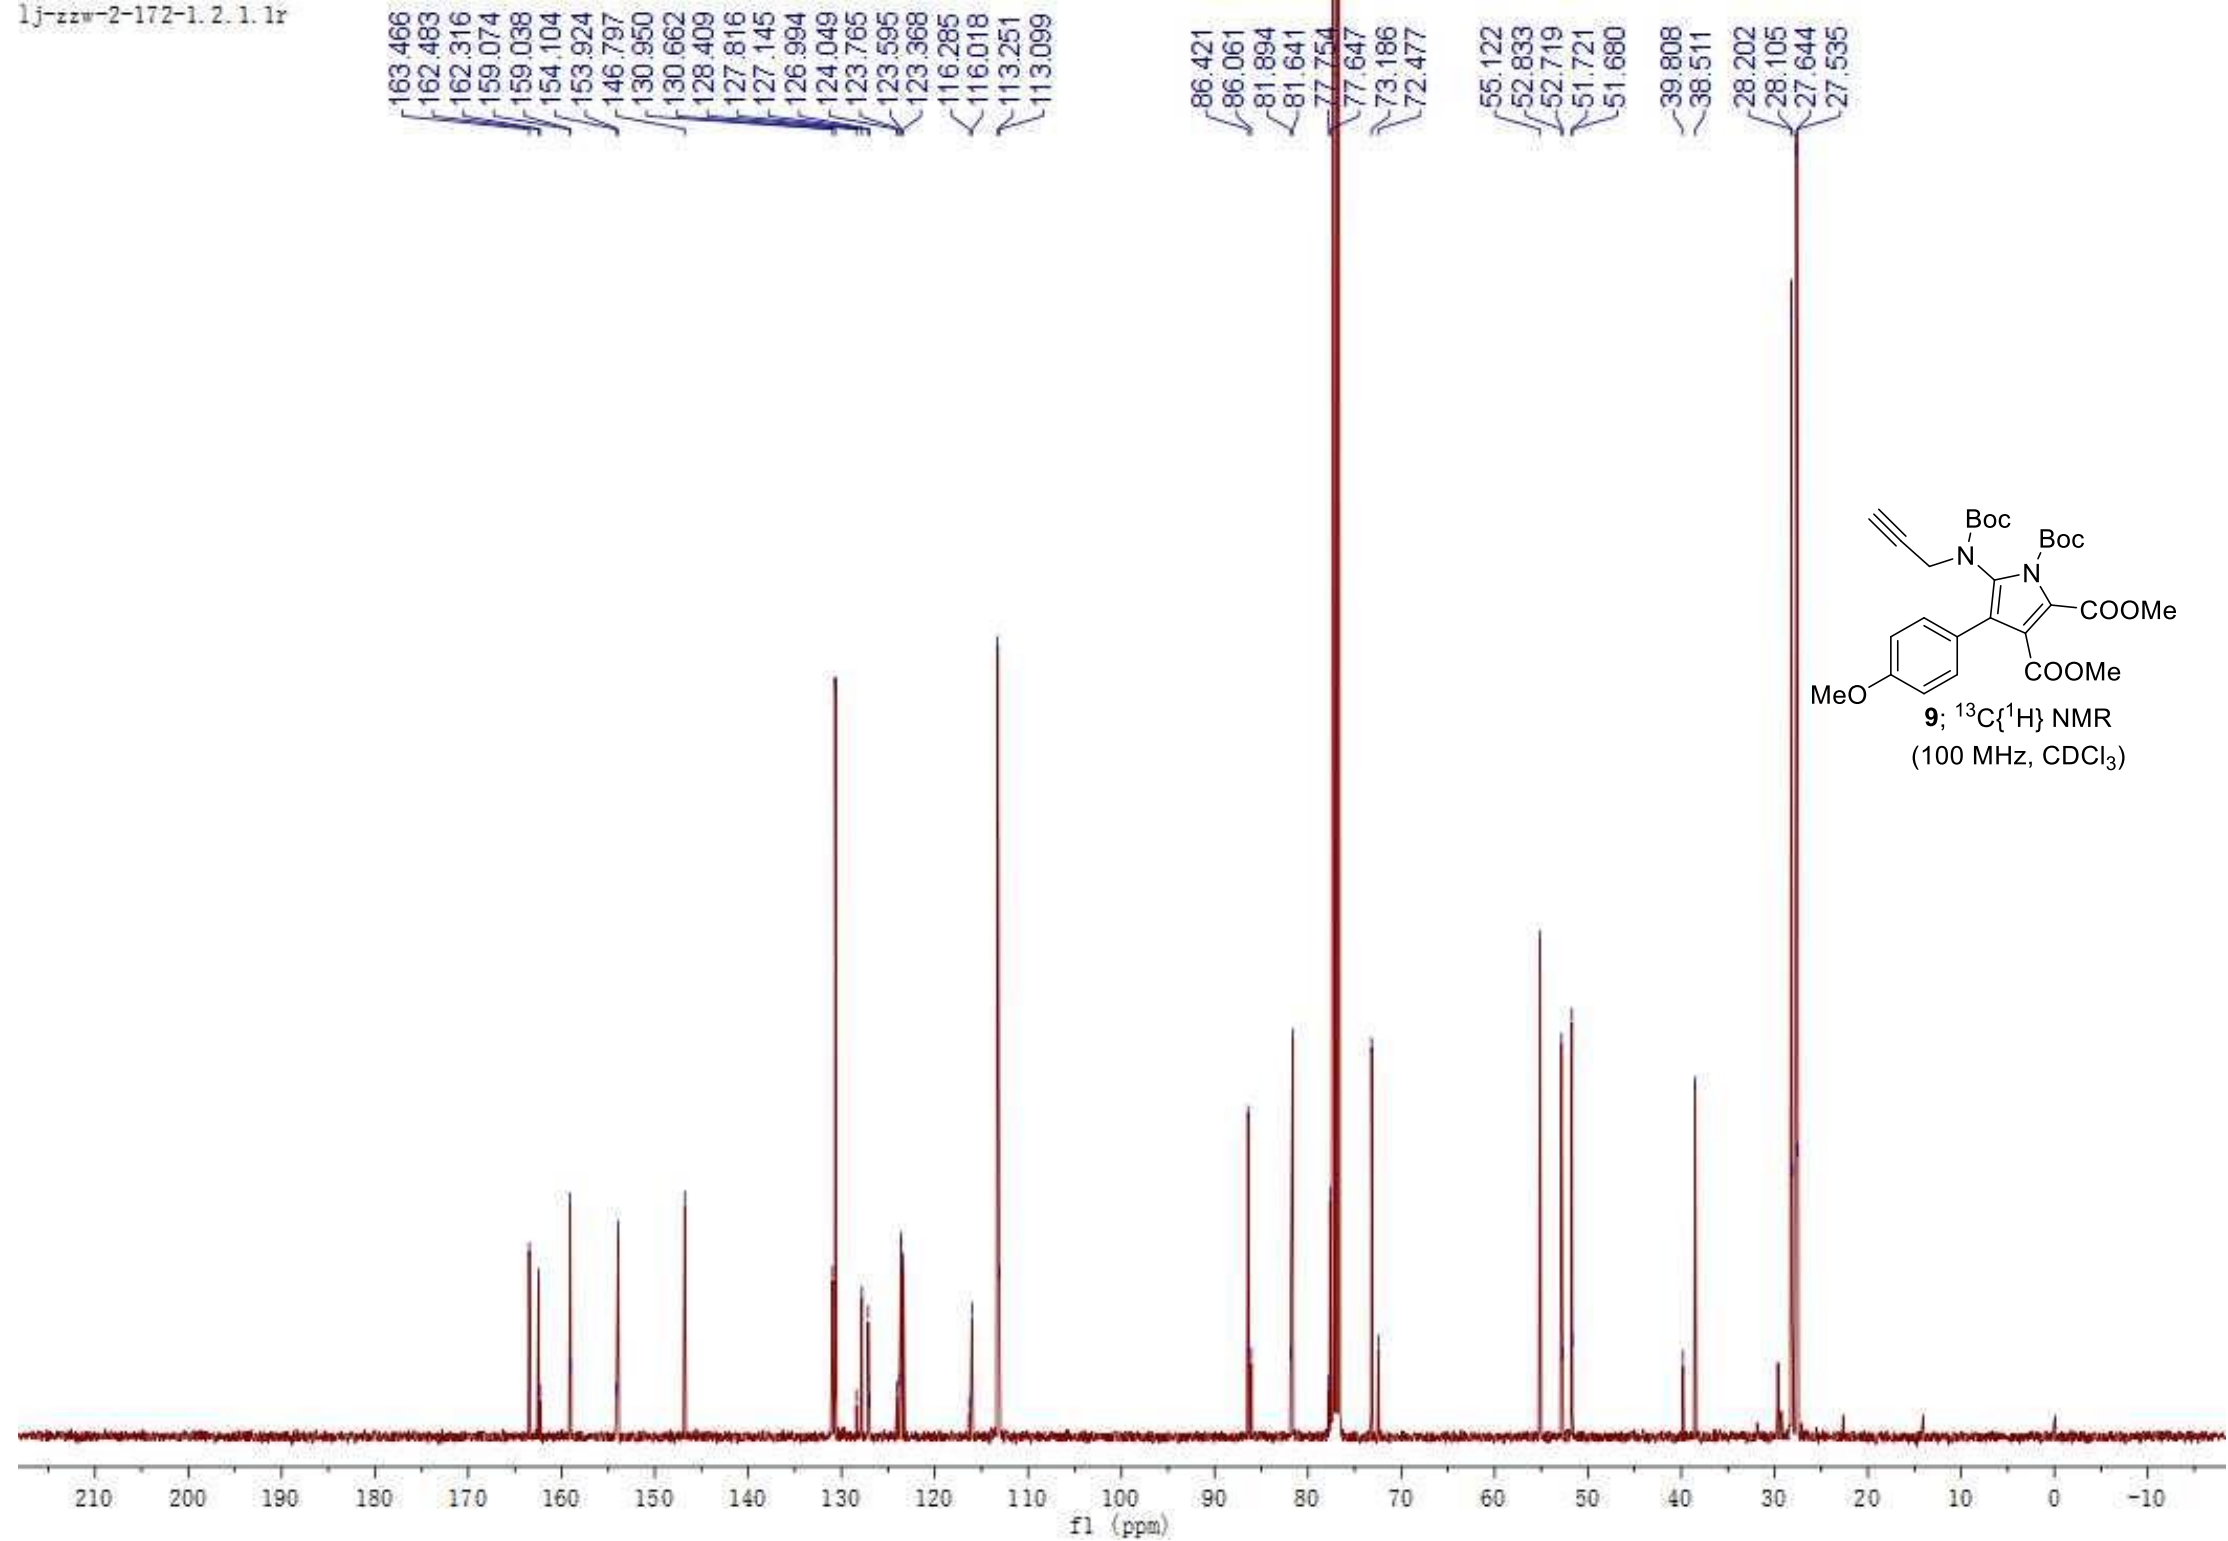

$$\begin{array}{r} 1.552 \\ - 1.436 \\ \hline 1.306 \end{array}$$
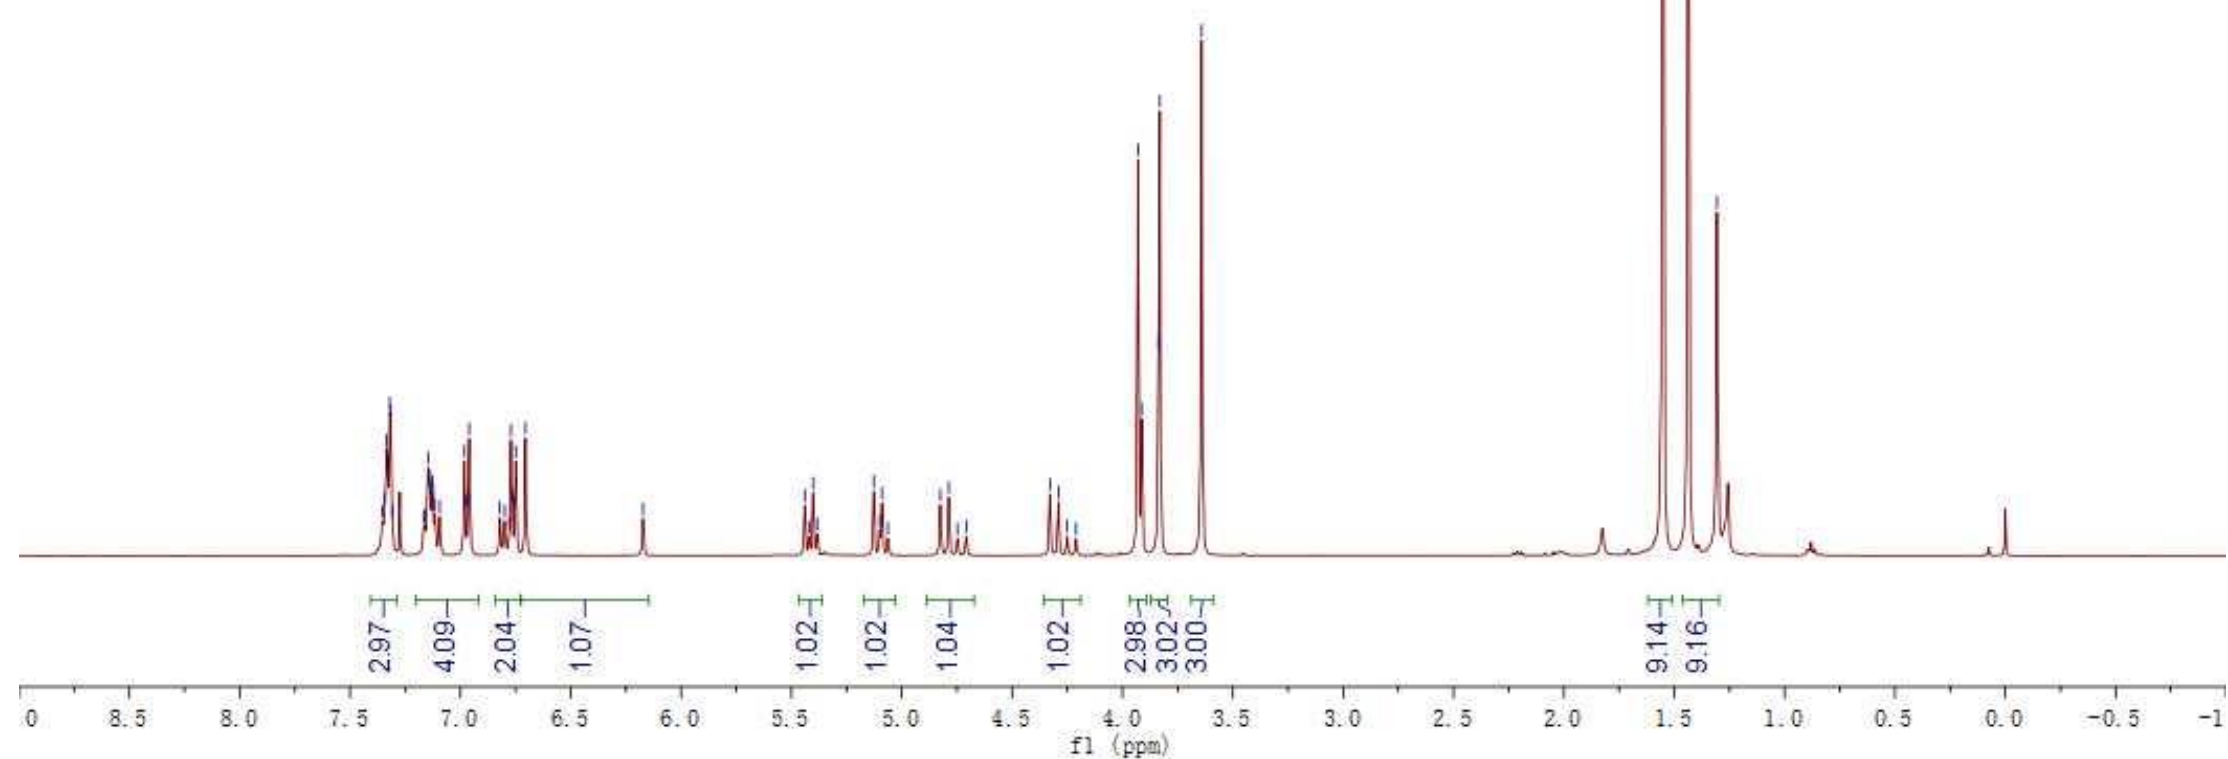

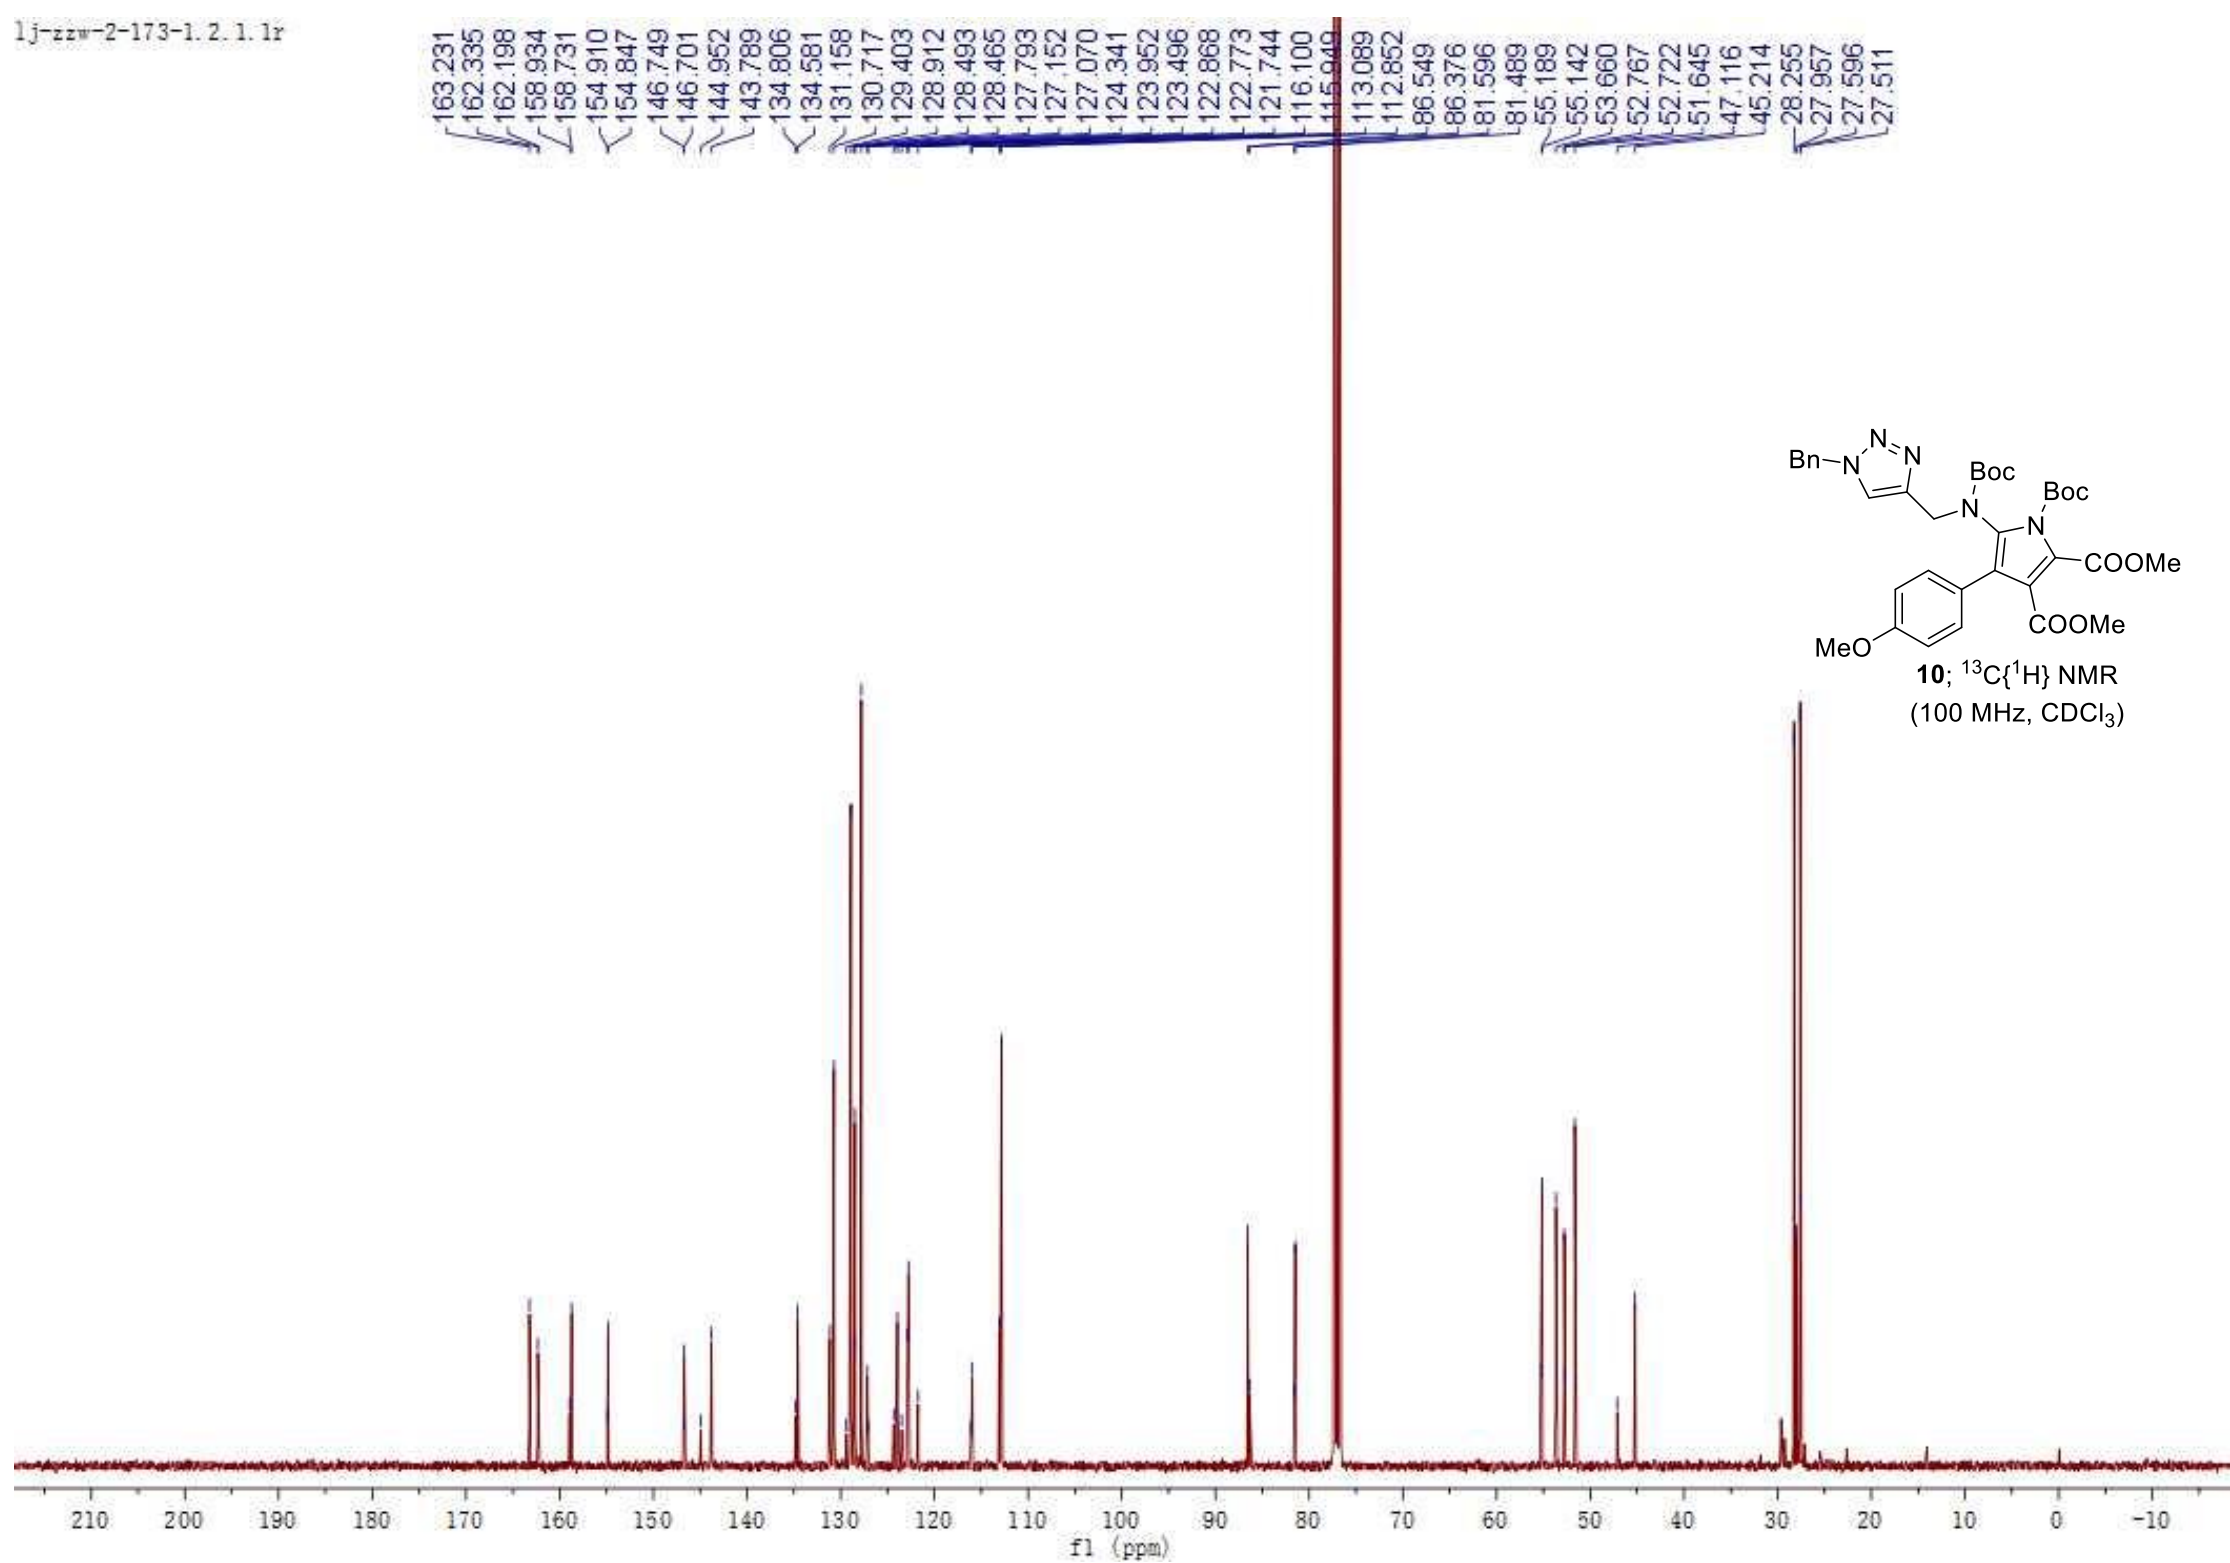



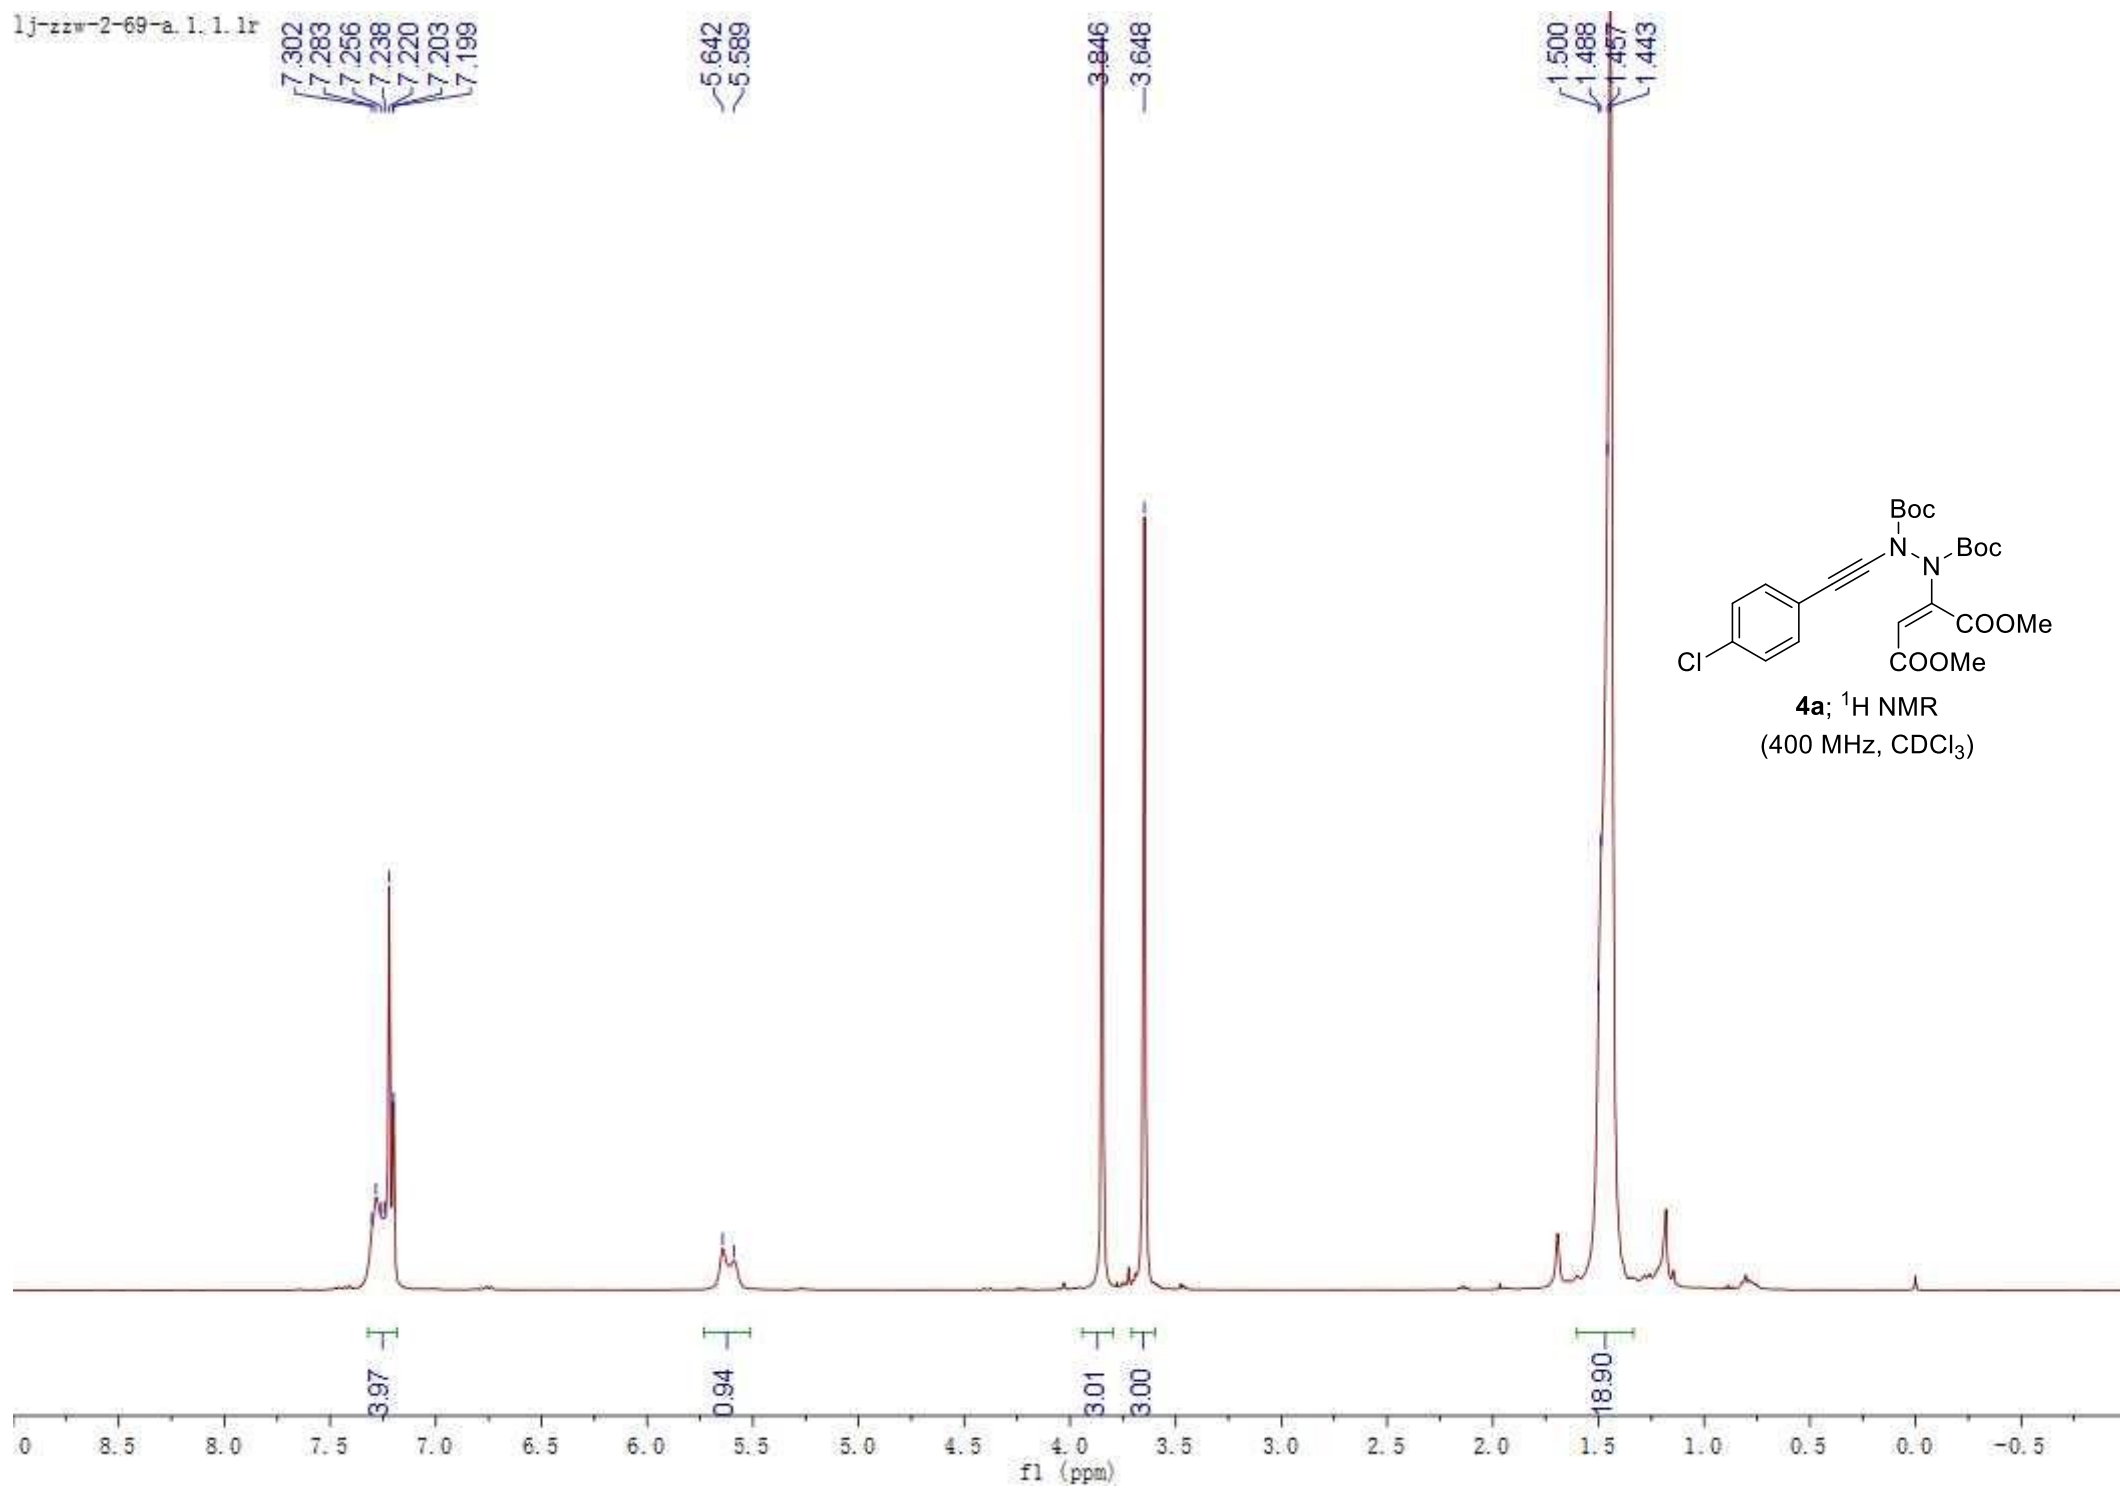

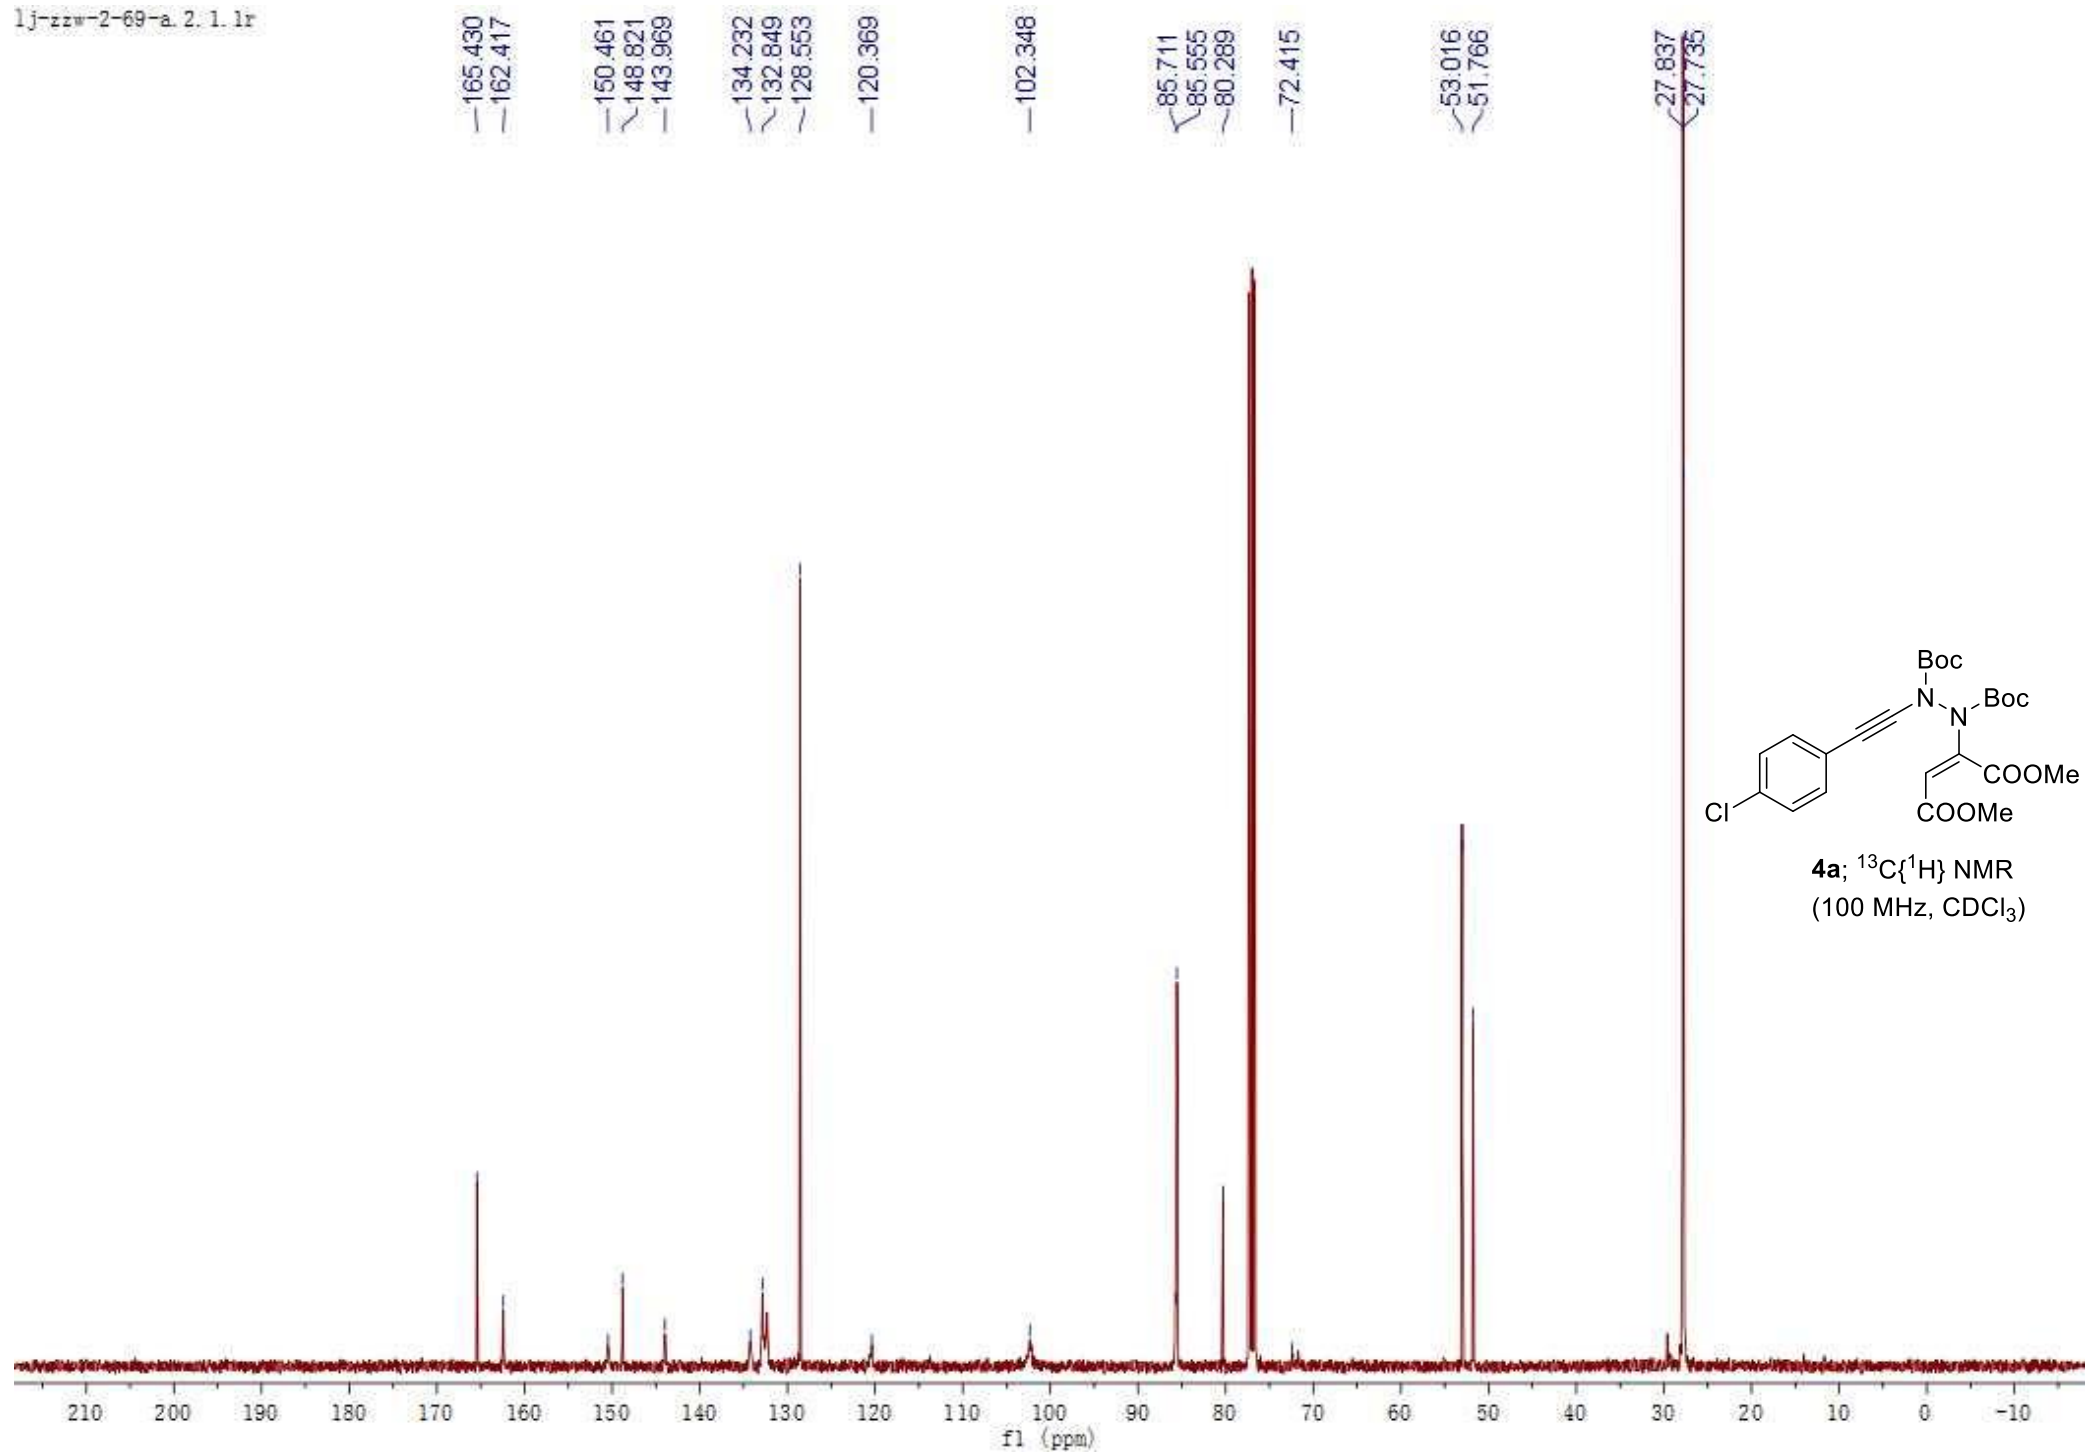

1j-zzw-2-160-1.1.1.1r

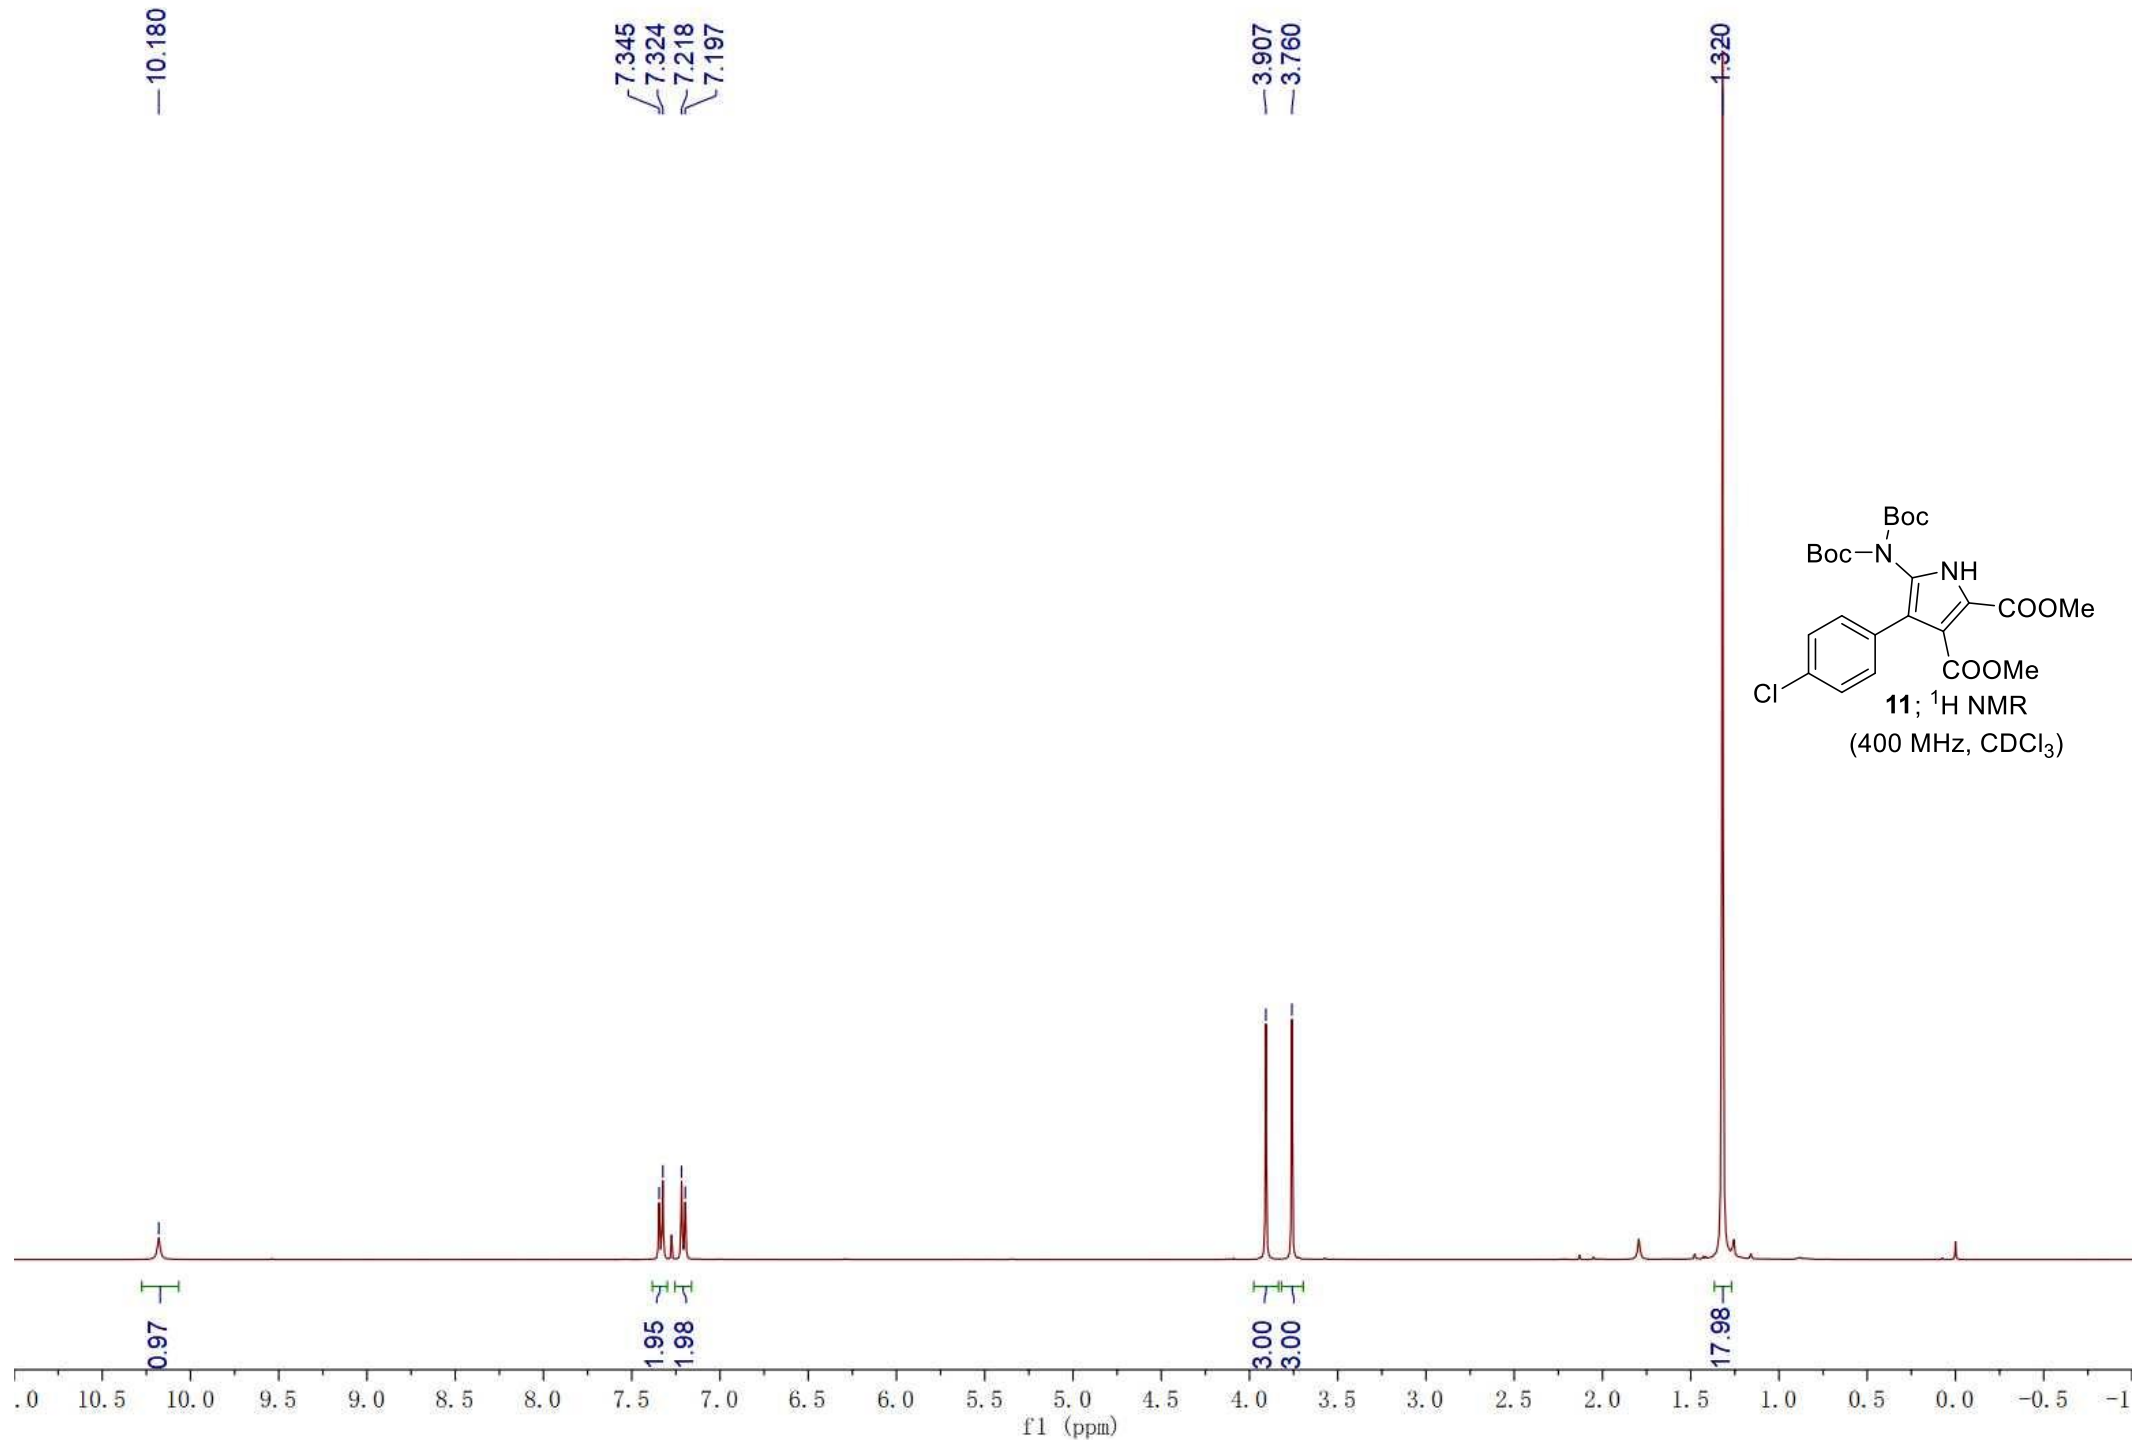

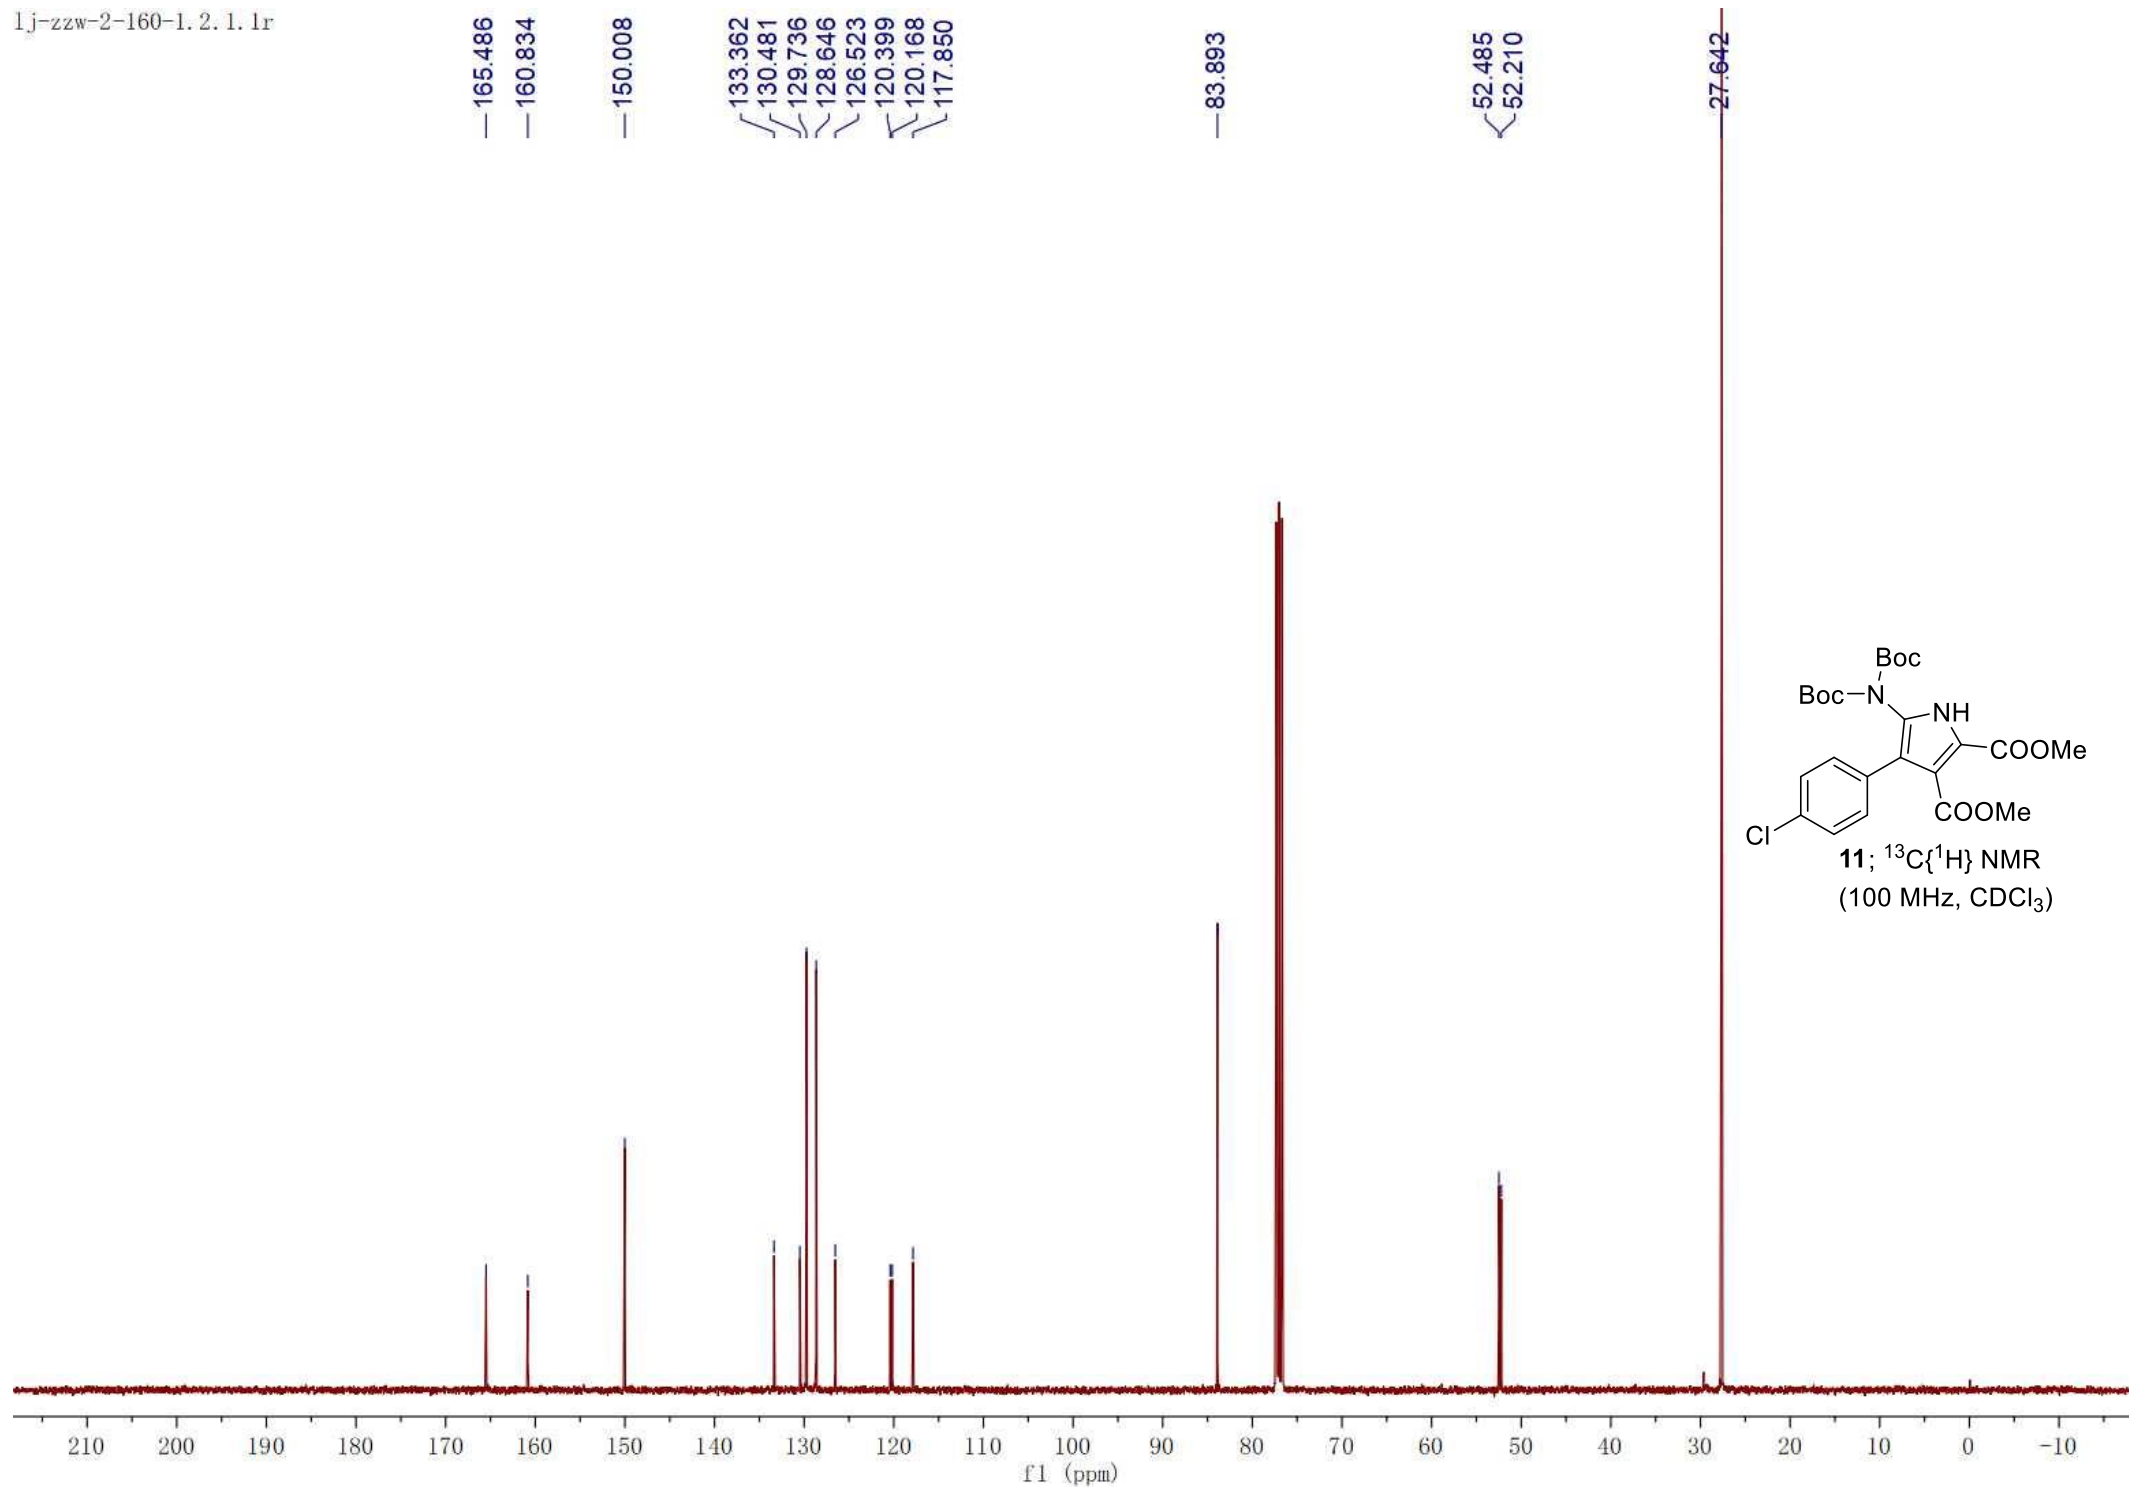

1j-zzw-2-163-1.1.1r

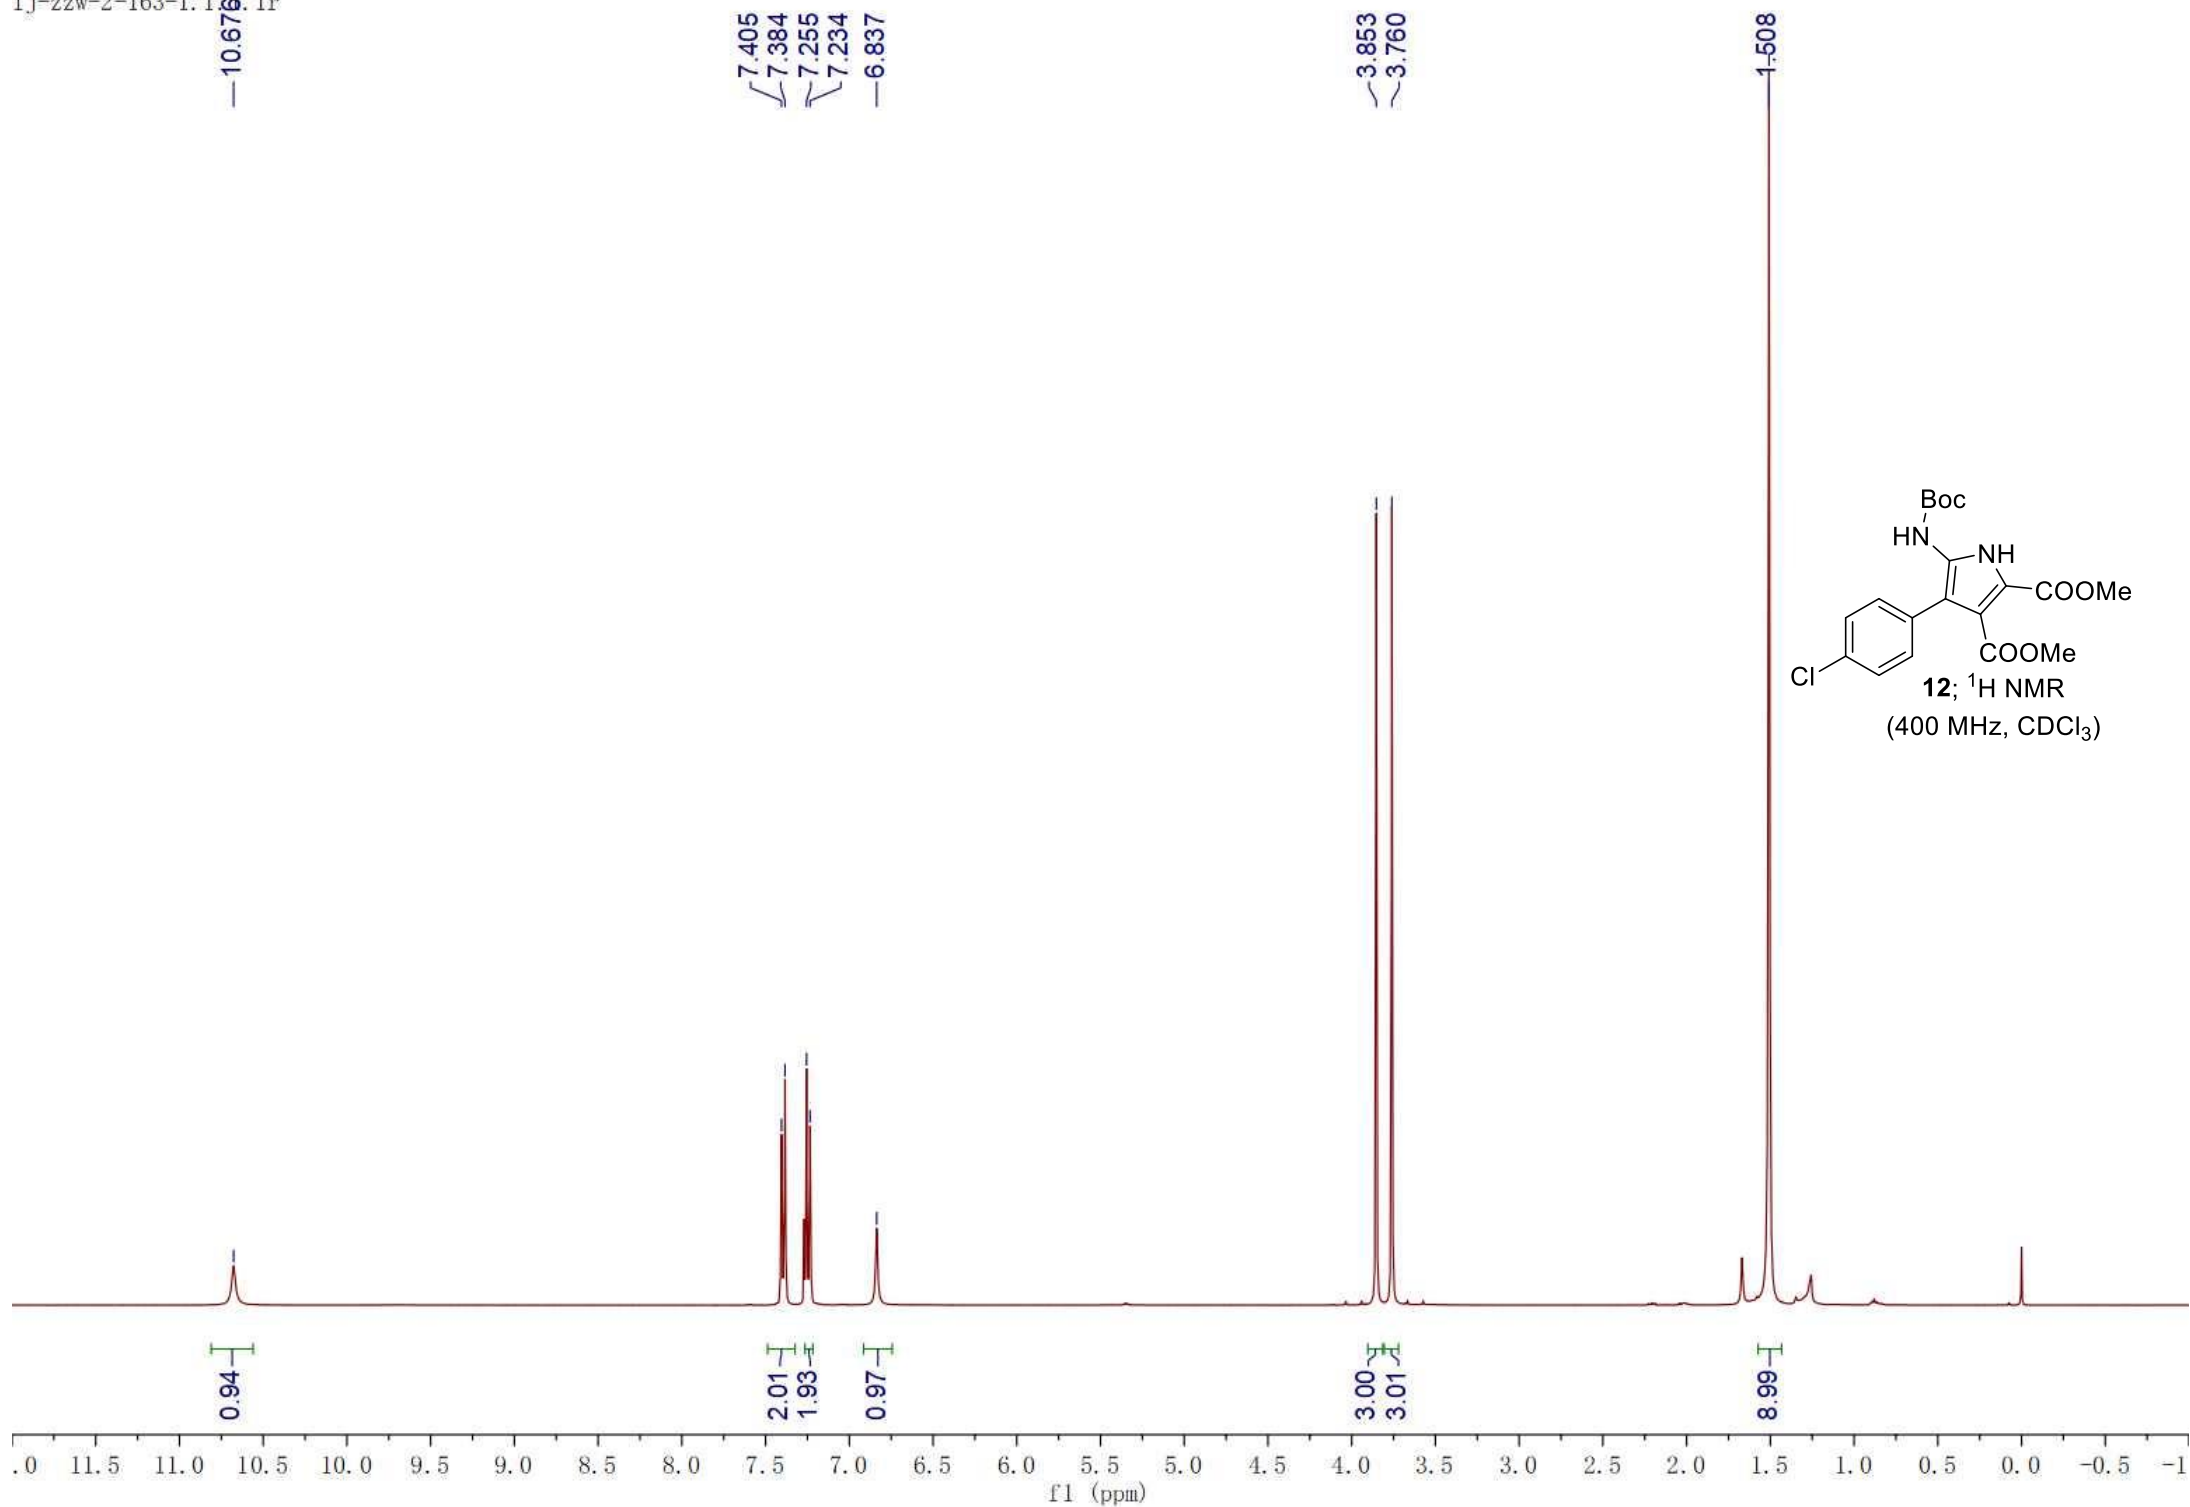

1j-zzw-2-163-1.2.1.1r

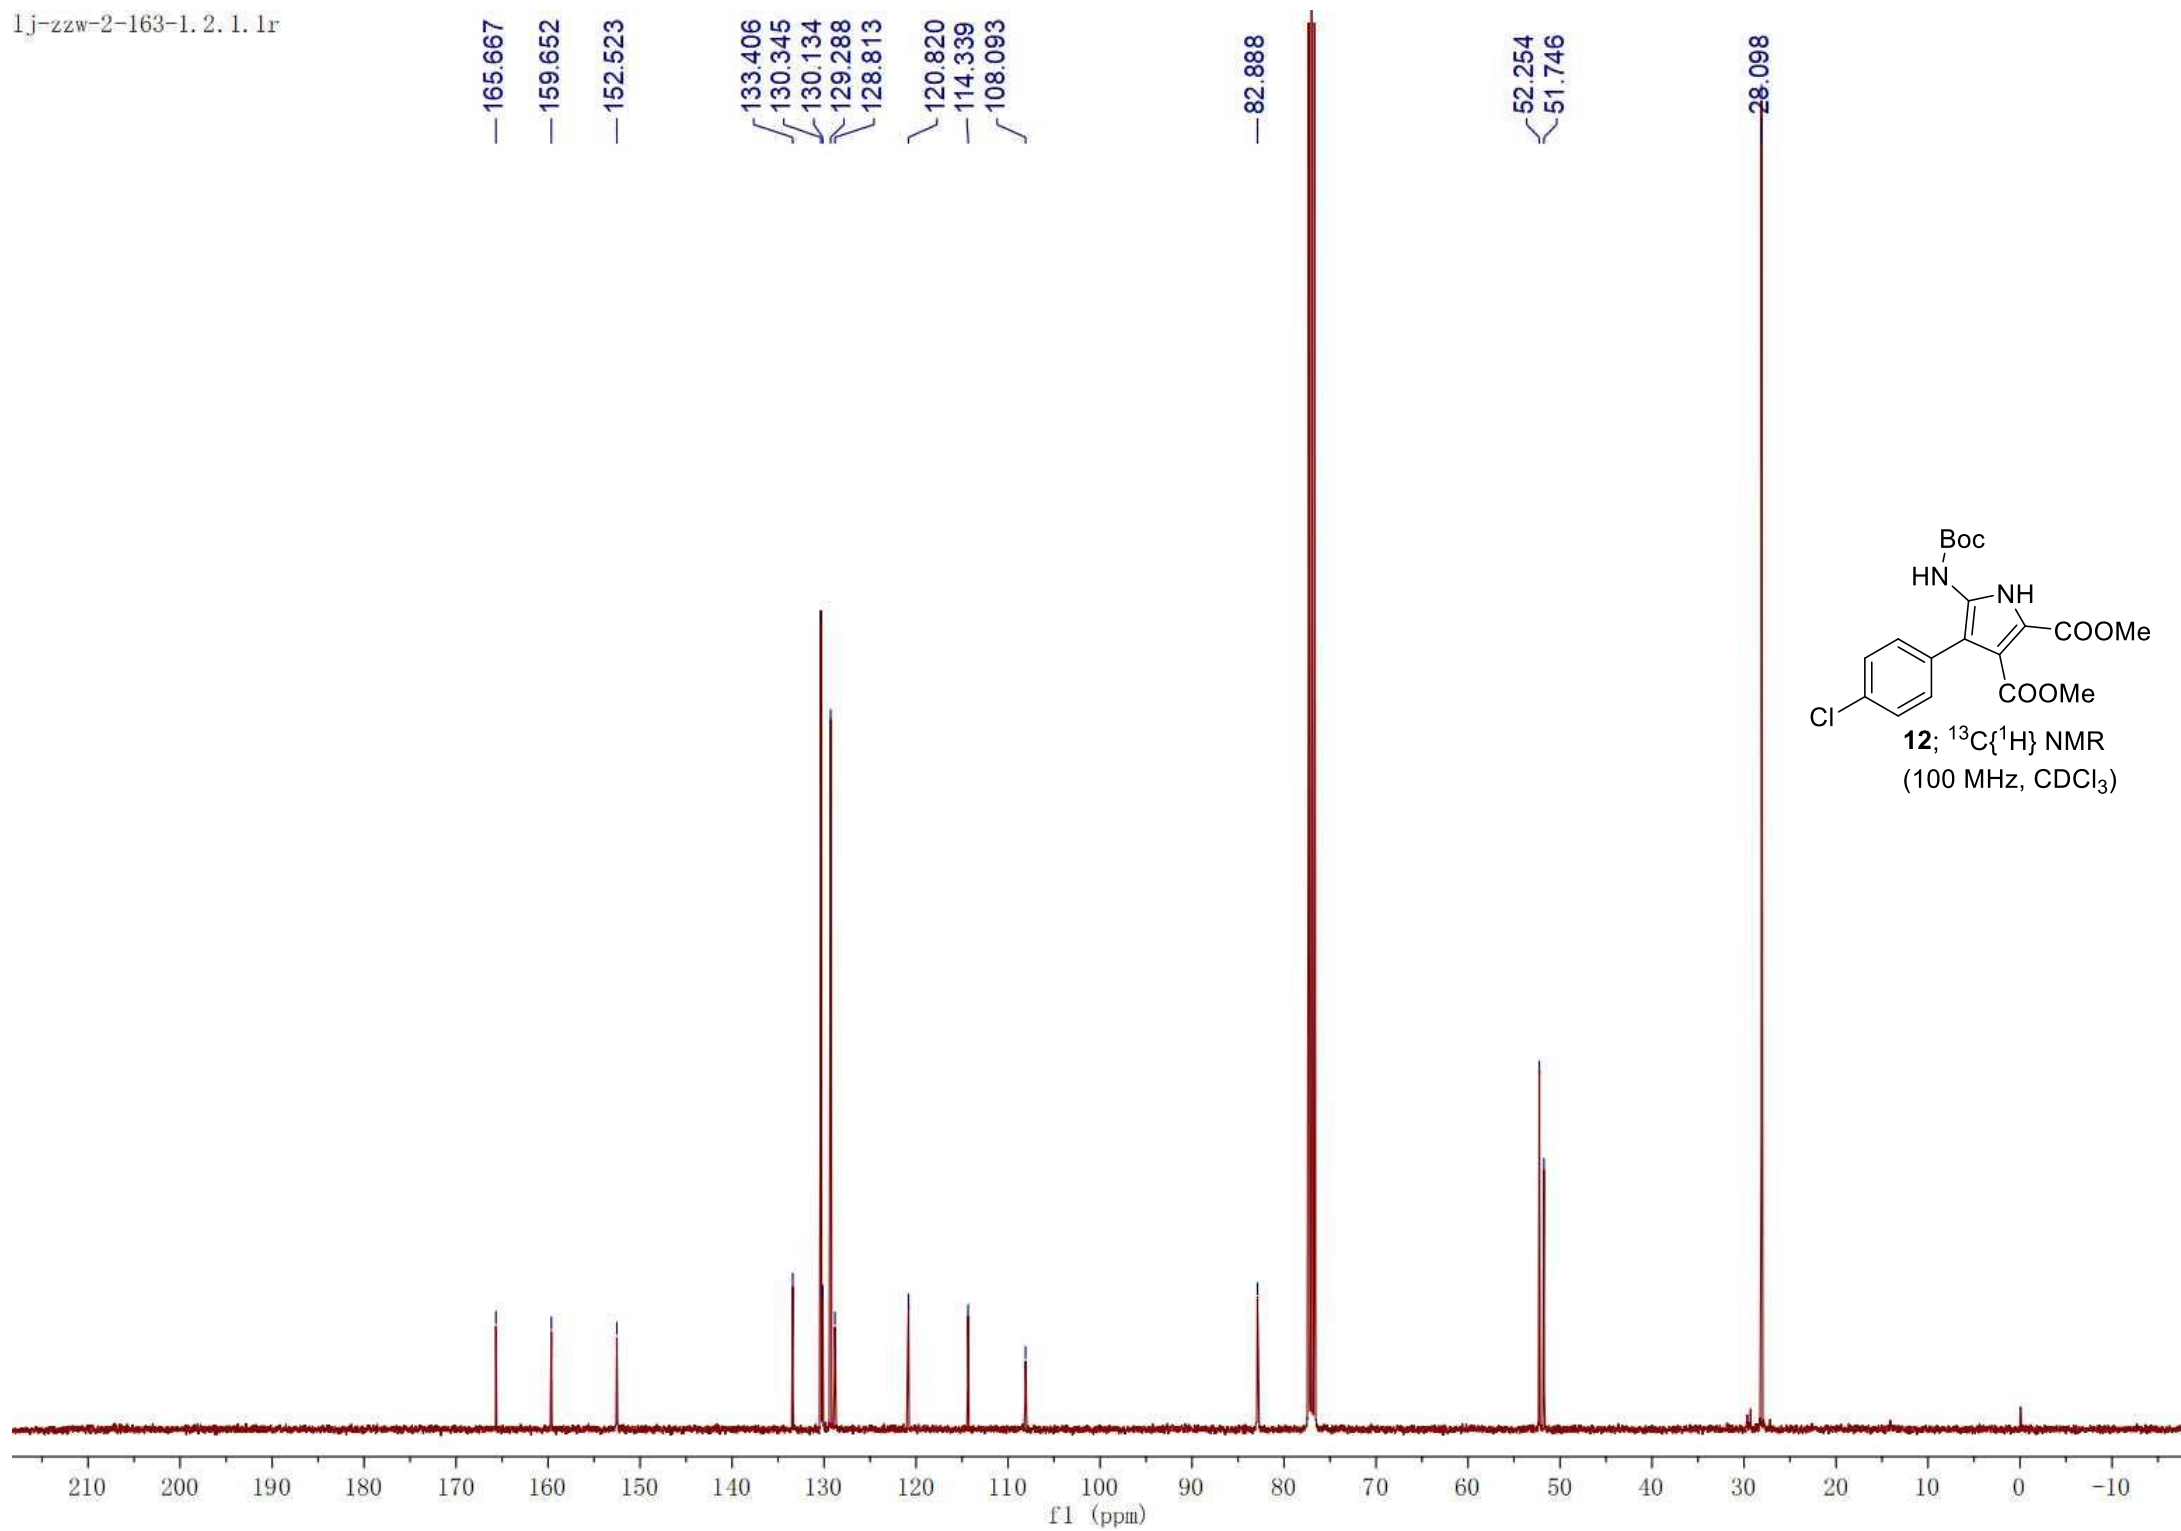

Supplement: d5ob01825k1.pdf [file d5ob01825k1.pdf]
